# Supplementary material
Source: Research Square preprint supplement (doi:10.21203/rs.3.rs-9529401/v1)
Supplement: Supplementary file 2 [file 07bdc4eccb5318b5547da427.docx]

**Supplemental information**

Text: Supplementary methods

Table S1: Children with neurodevelopmental regression and healthy controls

Table S2: Clinical characteristics of children with neurodevelopmental regression

Table S3: Bulk RNA sequencing pathway analysis

Table S4: Single-cell RNA seq pathway analysis – Cohort 1

Table S5: Single-cell RNA seq pathway analysis – Cohort 2

Table S6: Proteomics pathway analysis

Table S7: Bulk RNA and proteomics pathway analysis

Table S8: Phosphoproteomics pathway analysis

Table S9: ATAC sequencing pathway analysis

Table S10: Bulk RNA and ATAC sequencing pathway analysis

Table S11: *In vitro* givinostat pathways analysis

Figure S1: Study workflow

Figure S2: Bulk RNA seq

Figure S3: Single-cell RNA sequencing analysis – Cohort 1

Figure S4: Single-cell RNA sequencing analysis – Cohort 2

Figure S5: Proteomics analysis – Cohort 2

Figure S6: Bulk RNA and proteomics pathway analysis

Figure S7: Phosphoproteomics analysis – Cohort 2

Figure S8: ATAC sequencing pathway analysis

Figure S9: Bulk RNA and ATAC sequencing pathway analysis

Figure S10: *In vitro* givinostat pathway analysis
