# Supplementary material
Source: Research Square preprint supplement (doi:10.21203/rs.3.rs-9529401/v1)
Supplement: Supplementary file 3 [file 361bfb513a7b38fe97a30414.docx]

Proteomic, phosphoproteomic and database searching methodology

*Proteomic analysis of PBMCs*

The samples were thawed, benzonase treated, reduced, alkylated, precipitated and digested as described previously1. Approximately 90 µg of peptide from each sample was labelled with a TMTpro reagent and combined. A portion of the combined sample was fractionated by hydrophilic interaction liquid chromatography on a Vanquish Neo HPLC system (Thermo Fisher Scientific) with a 250 mm long and 1 mm inside diameter TSKgel Amide-80 column (Tosoh Biosciences). The HILIC gradient used 90% acetonitrile, 0.1% TFA (Buffer A) and a solution of 0.1% TFA (Buffer B). The flow rate was 50 μL/min. The gradient was from 100% Buffer A to 60% Buffer A in 35 min. Fractions were collected into a 96-well plate using an FC204 fraction collector (Gilson) at 1 min intervals, monitored by absorbance of UV at 214 nm. UV signal was used to combine select fractions into similar amounts of peptide. Fractions were dried and reconstituted in 0.1% formic acid. The LC-MS/MS was performed as described previously1 using a Dionex UltiMate 3000 RSLC nano system and Q Exactive Plus quadrupole-orbitrap mass spectrometer (Thermo Fisher Scientific).

*Phospoproteomic analysis of PBMCs*

For phosphoproteomics, LC-MS/MS was performed as for the proteomics except that gradient was from 1% buffer B to 5% buffer B in 1 min, to 25% buffer B in 74 min, to 35% buffer B in 8 min, to 99% buffer B in 1 min, held at 99% buffer B for 2 min, to 99% buffer A in 1 min and held for 8 min as the flow rate increased to 275 nL/min. The MS settings were the same as for proteomics except that maximum ion time was 115 ms and the normalized collision energy was 34.

*Database searching*

Proteomic and phosphoproteomic database searches were performed using MaxQuant (v1.6.7.0) with the following settings: variable modifications were oxidation (M), acetyl (protein N-terminus), deamidation (NQ) and phospho (STY); carbamidomethyl (C) was a fixed modification; digestion was set to trypsin/P with a maximum of 3 missed cleavages; the TMTpro correction factors were entered for lot XA340093; minimum reporter peptide ion faction was 0.6; the Homo sapiens reference proteome with canonical and isoform sequences downloaded Dec 6 2023 with 80,685 entries and 20,596 genes; the inbuilt contaminants fasta file was also used; minimum peptide length was 6 and maximum peptide mass was 6,000 Da; second peptides search and dependent peptides search were enabled; all modified peptides and counterpart non-modified peptides were excluded from protein quantification. All other settings were default.

*ATACseq library preparation*

Frozen PBMC aliquots from 8 patients and 6 controls were thawed rapidly in a 37 °C water bath, followed by washing with thawing medium consisting of RPMI-1640 supplemented with 10% FBS, 1% GlutaMAX™, and 1% HEPES. The cells were then incubated in culture medium (RPMI 1640 supplemented with 10% FBS and 1% GlutaMAX™) at 37 °C in a 5% CO2 atmosphere for 3 hours. Following the incubation, the cells were washed and stained with DAPI (1:100). Live cells (DAPI-negative) were sorted using a BD FACSAriaTM III Cell Sorter at the Westmead Cytometry Core Facility, Westmead Research Hub..

ATACseq libraries were generated from fluorescence-activated cell sorted (FACS)- isolated PBMCs (see method) using the ATAC-Seq Kit (Active Motif, Cat# 53150) according to the manufacturer’s instructions. The 14 samples were processed in three batches prior to library preparation, with patients and controls distributed across batches to minimise potential batch effects. Briefly, 500,000 cells per sample were pelleted and resuspended in transposition reaction mix containing 25 µL 2× TD reaction buffer and 10 µL Tn5 transposase in PBS supplemented with 1.0% digitonin and 10% Tween-20. The reaction was incubated at 37 °C for 30 min in a thermomixer at 800 rpm. The transposition reaction was immediately purified in 35 µL elution buffer using the supplied DNA purification column and stored at −20 °C until all samples were processed. Tagmented DNA fragments were amplified using 2.5 µL each of Nextera Index i7 and Nextera Index i5 primers, 10 µL 5× Q5 reaction buffer, 0.5 µL Q5 polymerase, and 1 µL 10 mM dNTPs. PCR amplification was performed under the following conditions: 72 °C for 5 min, 98 °C for 30 s, followed by 10 cycles of 98 °C for 10 s, 63 °C for 30 s, and 72 °C for 1 min. Amplified libraries were purified using SPRI beads according to the manufacturer’s instructions. All libraries were prepared simultaneously. Libraries were quantified using a Qubit fluorometer (Thermo Fisher Scientific) and fragment size distribution was assessed using an Agilent Bioanalyzer prior to sequencing. Fourteen libraries were multiplexed and sequenced across two runs on a NextSeq 2000 platform (Illumina) using P2 flow cells with the XLEAP-SBS 100-cycle reagent kit, generating 2 × 50 bp paired-end reads at an average depth of ~50 million paired-end reads per sample at the Australian Genome Research Facility (AGRF Ltd).

1. Tsang, E., Han, V.X., Flutter, C., Alshammery, S., Keating, B.A., Williams, T., Gloss, B.S., Graham, M.E., Aryamanesh, N., Pang, I., et al. (2024). Ketogenic diet modifies ribosomal protein dysregulation in KMT2D Kabuki syndrome. EBioMedicine *104*, 105156. 10.1016/j.ebiom.2024.105156.
