# Supplementary material
Source: Research Square preprint supplement (doi:10.21203/rs.3.rs-9529401/v1)
Supplement: Supplementary file 3 [file 2669f4169f40065c4a2c2575.xlsx]

## Sheet: GO_top10_blood
ONTOLOGY	ID	Description	GeneRatio	BgRatio	RichFactor	FoldEnrichment	zScore	pvalue	p.adjust	qvalue	geneID	Count	quadrant
CC	GO:0101002	ficolin-1-rich granule	7/94	185/19880	0.0378378	8.0023	6.59524	2.79131e-05	0.00633627	0.00549447	LAMP2/RHOA/HSPA6/ATG7/PGM1/ACLY/GNS	7	Q1 (UP_RNA, UP_Protein)
CC	GO:1904813	ficolin-1-rich granule lumen	5/94	124/19880	0.0403226	8.5278	5.79577	0.000306797	0.0244785	0.0212265	HSPA6/ATG7/PGM1/ACLY/GNS	5	Q1 (UP_RNA, UP_Protein)
CC	GO:0045335	phagocytic vesicle	5/94	145/19880	0.0344828	7.29274	5.24188	0.000628037	0.0244785	0.0212265	LAMP2/SYK/RAB11FIP1/NCF1/TLR2	5	Q1 (UP_RNA, UP_Protein)
CC	GO:0005766	primary lysosome	5/94	155/19880	0.0322581	6.82224	5.01568	0.000848608	0.0244785	0.0212265	LAMP2/PRKCD/MAN2B1/ACLY/GNS	5	Q1 (UP_RNA, UP_Protein)
CC	GO:0042582	azurophil granule	5/94	155/19880	0.0322581	6.82224	5.01568	0.000848608	0.0244785	0.0212265	LAMP2/PRKCD/MAN2B1/ACLY/GNS	5	Q1 (UP_RNA, UP_Protein)
CC	GO:0034774	secretory granule lumen	7/94	324/19880	0.0216049	4.56921	4.46465	0.000872209	0.0244785	0.0212265	ACTN4/PRKCD/HSPA6/MAN2B1/ATG7/ACLY/GNS	7	Q1 (UP_RNA, UP_Protein)
CC	GO:0035578	azurophil granule lumen	4/94	91/19880	0.043956	9.29624	5.46729	0.000914966	0.0244785	0.0212265	PRKCD/MAN2B1/ACLY/GNS	4	Q1 (UP_RNA, UP_Protein)
CC	GO:0060205	cytoplasmic vesicle lumen	7/94	329/19880	0.0212766	4.49977	4.412	0.00095355	0.0244785	0.0212265	ACTN4/PRKCD/HSPA6/MAN2B1/ATG7/ACLY/GNS	7	Q1 (UP_RNA, UP_Protein)
CC	GO:0031983	vesicle lumen	7/94	330/19880	0.0212121	4.48614	4.4016	0.000970514	0.0244785	0.0212265	ACTN4/PRKCD/HSPA6/MAN2B1/ATG7/ACLY/GNS	7	Q1 (UP_RNA, UP_Protein)
CC	GO:0036464	cytoplasmic ribonucleoprotein granule	6/94	261/19880	0.0229885	4.86182	4.32869	0.00150105	0.0324012	0.0280965	PCBP1/HNRNPK/TRIM25/CELF1/HELZ2/EDC4	6	Q1 (UP_RNA, UP_Protein)
CC	GO:0005793	endoplasmic reticulum-Golgi intermediate compartment	6/85	136/19880	0.0441176	10.3183	7.14528	2.57641e-05	0.00628644	0.0053969	PIEZO1/GALNT1/MYDGF/TMED10/LMAN1/ERP44	6	Q2 (DOWN_RNA, UP_Protein)
CC	GO:0000775	chromosome, centromeric region	7/85	265/19880	0.0264151	6.17802	5.5606	0.00014065	0.0171593	0.0147312	SMC6/UHRF2/CHMP2B/BRD7/NUP107/ACTL6A/FMR1	7	Q2 (DOWN_RNA, UP_Protein)
CC	GO:0098687	chromosomal region	8/85	408/19880	0.0196078	4.58593	4.79574	0.000356333	0.0245852	0.0211064	SMC6/UHRF2/CHMP2B/BRD7/NUP107/ACTL6A/THOC7/FMR1	8	Q2 (DOWN_RNA, UP_Protein)
CC	GO:0033116	endoplasmic reticulum-Golgi intermediate compartment membrane	4/85	81/19880	0.0493827	11.5497	6.23436	0.000403037	0.0245852	0.0211064	PIEZO1/GALNT1/TMED10/LMAN1	4	Q2 (DOWN_RNA, UP_Protein)
MF	GO:0070577	lysine-acetylated histone binding	3/85	23/18639	0.130435	28.602	8.96504	0.000151752	0.0248055	0.0236546	PHIP/BRD7/YEATS4	3	Q2 (DOWN_RNA, UP_Protein)
MF	GO:0140033	acetylation-dependent protein binding	3/85	24/18639	0.125	27.4103	8.76269	0.000172861	0.0248055	0.0236546	PHIP/BRD7/YEATS4	3	Q2 (DOWN_RNA, UP_Protein)
CC	GO:0034399	nuclear periphery	5/85	155/19880	0.0322581	7.54459	5.36005	0.000536352	0.026174	0.0224703	BRD7/ZNF326/NUP107/YEATS4/ACTL6A	5	Q2 (DOWN_RNA, UP_Protein)
BP	GO:0002181	cytoplasmic translation	34/181	169/18805	0.201183	20.902	25.6207	1.95977e-35	3.79607e-32	3.62866e-32	ZC3H15/SYNCRIP/NCK1/RPS11/EEF1D/RPL31/RPL37A/RPS8/RPL13/RPL24/RPL29/RPS23/FAU/RPS18/RPL26/RPS25/RPS7/RPS19/EIF3J/DENR/RPS3A/RPL3/RPL8/METTL3/RPS5/RPL9/RPL34/RPLP2/RPL10/RPL10A/RPL21/EIF2B5/EIF2B4/RPLP0	34	Q3 (DOWN_RNA, DOWN_Protein)
CC	GO:0022626	cytosolic ribosome	26/184	118/19880	0.220339	23.8062	24.0157	9.78835e-29	2.44709e-26	2.19465e-26	RPS11/RPL31/RPL37A/RPS8/RPL13/RPL24/ABCE1/RPL29/RPS23/FAU/RPS18/RPL26/RPS25/RPS7/RPS19/RPS3A/RPL3/RPL8/RPS5/RPL9/RPL34/RPLP2/RPL10/RPL10A/RPL21/RPLP0	26	Q3 (DOWN_RNA, DOWN_Protein)
CC	GO:0005840	ribosome	30/184	244/19880	0.122951	13.284	18.6606	4.00087e-25	5.00109e-23	4.48519e-23	DNAJC21/NCK1/RPS11/RPL31/RPL37A/RPS8/RPL13/RPL24/ABCE1/RPL29/RPS23/FAU/RPS18/RPL26/RPS25/MRPL3/RPS7/RPS19/RPS3A/RPL3/RPL8/RPS5/RPL9/RPL34/RPLP2/RPL10/RPL10A/MRPL27/RPL21/RPLP0	30	Q3 (DOWN_RNA, DOWN_Protein)
CC	GO:0044391	ribosomal subunit	27/184	186/19880	0.145161	15.6837	19.4466	1.19476e-24	9.95631e-23	8.92924e-23	RPS11/RPL31/RPL37A/RPS8/RPL13/RPL24/RPL29/RPS23/FAU/RPS18/RPL26/RPS25/MRPL3/RPS7/RPS19/RPS3A/RPL3/RPL8/RPS5/RPL9/RPL34/RPLP2/RPL10/RPL10A/MRPL27/RPL21/RPLP0	27	Q3 (DOWN_RNA, DOWN_Protein)
MF	GO:0003735	structural constituent of ribosome	27/189	175/18639	0.154286	15.2155	19.1228	2.43817e-24	9.65515e-22	8.4181e-22	RPS11/RPL31/RPL37A/RPS8/RPL13/RPL24/RPL29/RPS23/FAU/RPS18/RPL26/RPS25/MRPL3/RPS7/RPS19/RPS3A/RPL3/RPL8/RPS5/RPL9/RPL34/RPLP2/RPL10/RPL10A/MRPL27/RPL21/RPLP0	27	Q3 (DOWN_RNA, DOWN_Protein)
CC	GO:0022625	cytosolic large ribosomal subunit	15/184	57/19880	0.263158	28.4325	20.0463	2.76161e-18	1.72601e-16	1.54795e-16	RPL31/RPL37A/RPL13/RPL24/RPL29/RPL26/RPL3/RPL8/RPL9/RPL34/RPLP2/RPL10/RPL10A/RPL21/RPLP0	15	Q3 (DOWN_RNA, DOWN_Protein)
CC	GO:0015934	large ribosomal subunit	17/184	114/19880	0.149123	16.1117	15.6396	4.32292e-16	2.16146e-14	1.93849e-14	RPL31/RPL37A/RPL13/RPL24/RPL29/RPL26/MRPL3/RPL3/RPL8/RPL9/RPL34/RPLP2/RPL10/RPL10A/MRPL27/RPL21/RPLP0	17	Q3 (DOWN_RNA, DOWN_Protein)
CC	GO:0022627	cytosolic small ribosomal subunit	10/184	42/19880	0.238095	25.7246	15.5033	4.10781e-12	1.71159e-10	1.53503e-10	RPS11/RPS8/RPS23/FAU/RPS18/RPS25/RPS7/RPS19/RPS3A/RPS5	10	Q3 (DOWN_RNA, DOWN_Protein)
BP	GO:0022613	ribonucleoprotein complex biogenesis	26/181	494/18805	0.0526316	5.46816	9.9212	1.82111e-12	1.76375e-09	1.68597e-09	DNTTIP2/RPS11/DDX1/CLNS1A/RPS8/RPL24/BRIX1/EXOSC2/RPS23/FAU/DIMT1/RPL26/RPS25/RPS7/RPS19/EIF3J/DENR/RPS3A/RPS5/EMG1/DDX20/C1QBP/PIH1D1/RPLP0/MPHOSPH6/DDX18	26	Q3 (DOWN_RNA, DOWN_Protein)
BP	GO:0042254	ribosome biogenesis	21/181	317/18805	0.0662461	6.88264	10.4132	3.95839e-12	2.5558e-09	2.44309e-09	DNTTIP2/RPS11/RPS8/RPL24/BRIX1/EXOSC2/RPS23/FAU/DIMT1/RPL26/RPS25/RPS7/RPS19/RPS3A/RPS5/EMG1/C1QBP/PIH1D1/RPLP0/MPHOSPH6/DDX18	21	Q3 (DOWN_RNA, DOWN_Protein)
CC	GO:0070820	tertiary granule	12/180	164/19880	0.0731707	8.0813	8.70414	3.3311e-08	1.17921e-05	9.85305e-06	CD53/LTF/SPTAN1/CTSD/MMP9/SLC11A1/TSPAN14/AP2A2/DYNC1LI1/CAMP/HP/CD59	12	Q4 (UP_RNA, DOWN_Protein)
CC	GO:0042581	specific granule	11/180	160/19880	0.06875	7.59306	8.00375	2.38064e-07	4.21374e-05	3.52084e-05	ANXA11/CD53/LTF/SPTAN1/CTSD/LCN2/TSPAN14/HMOX2/CAMP/HP/CD59	11	Q4 (UP_RNA, DOWN_Protein)
CC	GO:0030139	endocytic vesicle	14/180	358/19880	0.0391061	4.31906	6.05751	5.05398e-06	0.000363486	0.000303716	RAC2/ANXA11/SH3KBP1/RIN3/DNM2/GAPVD1/HLA-A/LTF/STX12/SLC11A1/AP2A2/DYNC1LI1/BECN1/HP	14	Q4 (UP_RNA, DOWN_Protein)
CC	GO:0101002	ficolin-1-rich granule	10/180	185/19880	0.0540541	5.96997	6.49175	7.43521e-06	0.000363486	0.000303716	CAB39/PSMD11/CTSD/MMP9/AMPD3/SLC11A1/PGM2/PAFAH1B2/AP2A2/DYNC1LI1	10	Q4 (UP_RNA, DOWN_Protein)
CC	GO:0005925	focal adhesion	15/180	424/19880	0.0353774	3.90723	5.78411	7.725e-06	0.000363486	0.000303716	SDCBP/SSH2/RAC2/SH3KBP1/EZR/PDPK1/DNM2/TNS1/CD44/DCAF6/IL16/PABPC1/ARHGEF7/LPXN/CD59	15	Q4 (UP_RNA, DOWN_Protein)
CC	GO:0034774	secretory granule lumen	13/180	324/19880	0.0401235	4.43141	5.95259	8.44012e-06	0.000363486	0.000303716	SDCBP/AZU1/CAB39/LTF/SPTAN1/PSMD11/CTSD/LCN2/AMPD3/PGM2/PAFAH1B2/CAMP/HP	13	Q4 (UP_RNA, DOWN_Protein)
CC	GO:0060205	cytoplasmic vesicle lumen	13/180	329/19880	0.0395137	4.36407	5.88137	9.94103e-06	0.000363486	0.000303716	SDCBP/AZU1/CAB39/LTF/SPTAN1/PSMD11/CTSD/LCN2/AMPD3/PGM2/PAFAH1B2/CAMP/HP	13	Q4 (UP_RNA, DOWN_Protein)
CC	GO:1904724	tertiary granule lumen	6/180	55/19880	0.109091	12.0485	7.84292	1.01694e-05	0.000363486	0.000303716	LTF/SPTAN1/CTSD/MMP9/CAMP/HP	6	Q4 (UP_RNA, DOWN_Protein)
CC	GO:0030055	cell-substrate junction	15/180	434/19880	0.0345622	3.8172	5.67216	1.01908e-05	0.000363486	0.000303716	SDCBP/SSH2/RAC2/SH3KBP1/EZR/PDPK1/DNM2/TNS1/CD44/DCAF6/IL16/PABPC1/ARHGEF7/LPXN/CD59	15	Q4 (UP_RNA, DOWN_Protein)
CC	GO:0031983	vesicle lumen	13/180	330/19880	0.0393939	4.35084	5.86729	1.0268e-05	0.000363486	0.000303716	SDCBP/AZU1/CAB39/LTF/SPTAN1/PSMD11/CTSD/LCN2/AMPD3/PGM2/PAFAH1B2/CAMP/HP	13	Q4 (UP_RNA, DOWN_Protein)
