# Supplementary material
Source: Research Square preprint supplement (doi:10.21203/rs.3.rs-9529401/v1)
Supplement: Supplementary file 6 [file 5bd2654c2237ad0979e6b7dd.xlsx]

## Sheet: Sheet 1
ONTOLOGY	ID	Description	GeneRatio	BgRatio	RichFactor	FoldEnrichment	zScore	pvalue	p.adjust	qvalue	geneID	Count	Expression
CC	GO:0005840	ribosome	62/1033	244/19880	0.254098	4.8901	14.3138	3.25814e-26	1.94511e-23	1.64965e-23	DNAJC21/RPL36/MRPL54/MRPL50/RPL5/RPL7L1/RPS11/SERP1/MRPS22/RPL35A/RPS16/MRPS18C/LTN1/MRPL20/MRPS31/LARP4/MRPS33/PSMA6/RPS6/RPL31/ZCCHC17/RPL13/RPS20/RPS15A/RPL24/RPS27A/RPL6/RPL37/RPL29/RSL24D1/MRPL11/MRPS35/FAU/RPS29/FXR1/RPL39/RPS7/HBS1L/RPS19/RPS24/RPS3A/RPL8/MRPL43/MRPS14/MRPL36/MRPL48/RPL27/RPL30/MRPL24/RPLP2/MTG1/RPL23/RPL10A/RPLP1/MRPL52/RPL21/RPL18/RPL14/HSPA14/RPSA/CHCHD1/RPL23A	62	Down
MF	GO:0003735	structural constituent of ribosome	49/1034	175/18639	0.28	5.04731	13.0366	9.01246e-22	8.21937e-19	7.71277e-19	RPL36/MRPL54/RPL5/RPL7L1/RPS11/MRPS22/RPL35A/RPS16/MRPS18C/MRPL20/MRPS31/MRPS33/RPS6/RPL31/RPL13/RPS20/RPS15A/RPL24/RPS27A/RPL6/RPL37/RPL29/RSL24D1/MRPL11/MRPS35/FAU/RPS29/RPL39/RPS7/RPS19/RPS24/RPS3A/RPL8/MRPL43/MRPS14/MRPL36/RPL27/RPL30/MRPL24/RPLP2/RPL23/RPL10A/RPLP1/MRPL52/RPL21/RPL18/RPL14/RPSA/RPL23A	49	Down
BP	GO:0002181	cytoplasmic translation	44/999	169/18805	0.260355	4.90088	12.0657	4.70588e-19	2.06212e-15	2.02947e-15	RPL36/SYNCRIP/CNBP/RPL5/RPS11/RPL35A/RPS16/RPS6/RPL31/EIF2B1/RPL13/RPS20/RPS15A/RPL24/RPS27A/RPL6/RPL37/RPL29/FAU/RPS29/RPL39/RPS7/RPS19/RPS24/RPS3A/EIF3H/RPL8/RPL27/DHX36/DRG1/RPL30/RPLP2/RPL23/RBM4/RPL10A/RPLP1/EIF4B/RPL21/EIF2S2/EIF2B5/RPL18/RPL14/RPSA/RPL23A	44	Down
BP	GO:0042254	ribosome biogenesis	51/999	317/18805	0.160883	3.02844	8.62723	1.18597e-12	2.59845e-09	2.55732e-09	EIF1AX/USP16/WDR75/MAK16/DIS3/RPL5/RPL7L1/NGDN/RPS11/RPUSD4/KRR1/NOL8/RPL35A/RPS16/NVL/RPS6/XPO1/RPS15A/NOP58/RPL24/SBDS/RPS27A/TRMT61B/UTP18/EXOSC2/RSL24D1/FAU/PWP1/DIMT1/TMA16/RPF1/RPS7/RPS19/RAN/RPS24/DDX47/RPS3A/RIOK1/METTL18/MRTO4/RPS19BP1/RPL27/NOL11/EXOSC3/RBM34/TFB2M/RPL14/GTPBP10/RPSA/NPM1/DDX18	51	Down
BP	GO:0008380	RNA splicing	58/999	482/18805	0.120332	2.26511	6.66465	4.80491e-09	5.26377e-06	5.18045e-06	LUC7L3/TIA1/MBNL2/PRPF39/PPP4R2/SRSF3/THOC1/CDC40/SREK1/SRSF7/LSM8/RBM12B/SYNCRIP/AHNAK/PPIL3/FAM98B/RPUSD4/PLRG1/SREK1IP1/SRSF11/RBM39/LSM1/PPIG/REST/SUPT3H/SNRPD1/C2orf49/PRPF38B/SNRPF/PIK3R1/SRSF1/ENY2/SNRPG/MAGOHB/DHX35/SNRNP27/RBMXL1/GEMIN2/PPIH/DDX47/RBM41/RBM25/RBMX/UBL5/CWC22/SLU7/PTBP2/FASTK/TAF9/RBM4/PSIP1/SFPQ/PRPF40B/ZC3H10/DDX39B/ZCCHC8/RBM11/HNRNPA1	58	Down
CC	GO:0030684	preribosome	20/1033	106/19880	0.188679	3.63112	6.35875	4.71248e-07	2.81335e-05	2.386e-05	WDR75/MAK16/NGDN/RPS11/KRR1/RPS16/RPS6/RPS15A/NOP58/RPS27A/UTP18/DIMT1/RPF1/RPS7/RPS19/RPS24/RPS3A/RIOK1/MRTO4/RPS19BP1	20	Down
BP	GO:0006403	RNA localization	31/999	206/18805	0.150485	2.83271	6.26481	1.52222e-07	0.000111173	0.000109413	DCP2/SRSF3/THOC1/SRSF7/NUP54/TOMM20/EIF4E/CPSF6/SRSF1/ENY2/NUP107/CETN3/XPO1/NOP58/MAGOHB/FYTTD1/SSB/FXR1/PABPN1/RAN/TERF1/NDC1/DHX36/LRPPRC/CETN2/DDX39B/KIF5C/HHEX/G3BP2/CCT2/HNRNPA1	31	Down
BP	GO:0043161	proteasome-mediated ubiquitin-dependent protein catabolic process	49/999	467/18805	0.104925	1.97509	5.0542	4.35474e-06	0.00119265	0.00117377	BIRC2/PAQR3/SOCS4/UFL1/PCNP/RNF7/LTN1/BBS7/PSMA6/RNF139/BAG5/UBE2N/KLHL20/XPO1/KBTBD6/GLMN/BFAR/PSMD10/FBXO45/PSMC6/USP14/ANAPC16/ANAPC4/KBTBD8/SKP1/EIF3H/DERL1/FBXO3/CDC16/UBE2W/APC/TRIB2/TAF9/FBXO4/TRIM2/SMAD7/STYX/UBXN11/HFE/TRAF4/CDC26/ZNRF2/PSMA5/FBXO48/USP38/PSMB5/COMMD1/RBX1/PSMA1	49	Down
MF	GO:0043021	ribonucleoprotein complex binding	26/1034	177/18639	0.146893	2.6479	5.33852	5.22943e-06	0.00238462	0.00223765	USP16/RBM39/TTC5/SRP9/NVL/LETMD1/LTN1/SNRPD1/CPSF6/GUF1/SNRPG/SBDS/SERBP1/PPIH/FXR1/TMA16/PHF6/NAA15/RICTOR/DERL1/SRP72/MTIF3/RPLP1/EIF4B/RPSA/NPM1	26	Down
BP	GO:0042775	mitochondrial ATP synthesis coupled electron transport	16/999	101/18805	0.158416	2.98199	4.73064	8.08766e-05	0.013126	0.0129182	NDUFA1/UQCRC2/CYCS/COX7A2L/UQCRFS1/NDUFA12/NDUFV3/NDUFB8/DGUOK/COX7A2/COX6A1/UQCRQ/DNAJC15/COX7C/COX5B/NDUFV1	16	Down
MF	GO:0019843	rRNA binding	13/1034	65/18639	0.2	3.60522	5.09907	4.85031e-05	0.0147449	0.0138361	RPL5/RPS11/RPUSD4/MRPS18C/MRPL20/SBDS/RPL37/MRPL11/RPF1/RPL8/RPL23/NPM1/RPL23A	13	Down
MF	GO:0055105	ubiquitin-protein transferase inhibitor activity	6/1034	15/18639	0.4	7.21044	5.83141	9.32101e-05	0.0212519	0.0199421	RPL5/GLMN/RPS20/RPL37/RPS7/RPL23	6	Down
CC	GO:0070069	cytochrome complex	8/1033	41/19880	0.195122	3.75511	4.13425	0.00106798	0.0229126	0.0194322	UQCRC2/COX7A2L/UQCRFS1/COX7A2/COX6A1/UQCRQ/COX7C/COX5B	8	Down
BP	GO:0007005	mitochondrion organization	42/999	445/18805	0.094382	1.77663	3.9272	0.000227465	0.0284787	0.0280278	COX17/HIGD1A/TRMT10B/NDUFA1/AKT3/DNM1L/POLG2/NDUFAF4/TOMM20/MFN1/LETMD1/RAP1GDS1/MTX3/TIMMDC1/SLC30A9/COX7A2L/SLC25A36/TIMM8B/LYRM7/ATAD3B/PSMD10/VPS13C/UQCRFS1/NDUFA12/NDUFB8/RALA/TMEM126A/VPS54/COX7A2/DDHD1/TIMM13/COA4/TMEM14A/SLC35F6/ATG3/TIMM22/SIVA1/IFI6/NDUFAF5/SMIM20/HIGD2A/ATF2	42	Down
BP	GO:0050900	leukocyte migration	47/583	395/18805	0.118987	3.83801	10.1964	2.31611e-15	6.77091e-12	5.27132e-12	FFAR2/ALOX5/PREX1/SELPLG/C5AR1/PIK3CD/LYN/WDR1/NEDD9/TGFB1/CSF3R/RIN3/PECAM1/HCK/C5AR2/F11R/PTAFR/SYK/ABL2/STK10/CRKL/NLRP12/ST3GAL4/PTK2B/CXCL16/ADAM8/NINJ1/IL1B/FPR2/ITGB2/LGMN/TREM1/LYST/MYD88/DUSP1/LYVE1/PDE4B/ITGA9/ICAM1/CCR1/GOLPH3/ADTRP/FLT1/CAMK1D/FUT7/PADI2/CSF1R	47	Up
BP	GO:0002274	myeloid leukocyte activation	37/583	251/18805	0.14741	4.75481	10.7119	2.80311e-15	6.77091e-12	5.27132e-12	SPI1/PREX1/C5AR1/PIK3CD/LYN/GAB2/DOCK2/TGFB1/PRKCD/PTAFR/SYK/NDRG1/TLR2/STXBP2/RBPJ/UNC13D/PLCG2/LILRA2/LAT2/CRTC3/SBNO2/TGFBR2/LCP2/IFNGR2/PRKCE/FES/ITGB2/NR1D1/BPI/MYD88/SLC11A1/FCAR/LILRB4/LTBR/ITGAM/MMP8/CAMP	37	Up
CC	GO:0030667	secretory granule membrane	40/609	322/19880	0.124224	4.05512	9.82533	5.13946e-14	2.36415e-11	1.94217e-11	RAB7A/C5AR1/MGAM/DNAJC5/FCGR2A/PECAM1/PTAFR/ATP11A/ANPEP/STK10/RAB3D/TNFRSF1B/TLR2/PSAP/IGF2R/STX3/CEACAM3/APLP2/PLAUR/ITGAX/FPR1/NFAM1/ADAM8/MANBA/CD44/KCNAB2/FPR2/ITGB2/ITPR2/FCGR3B/CA4/LILRB2/SLC11A1/FCAR/DSC1/ITGAM/SIRPB1/AP2A2/CKAP4/CD59	40	Up
CC	GO:0098857	membrane microdomain	36/609	293/19880	0.122867	4.01083	9.22974	1.35082e-12	1.55345e-10	1.27617e-10	SDCBP/SELPLG/LYN/GAB2/PACSIN2/PECAM1/INPP5D/HCK/TNFRSF1A/TNFRSF1B/ENTPD1/TLR2/FLOT1/TPP1/PLCG2/LAT2/SLC9A1/FURIN/TGFBR2/NFAM1/LCP2/BEST1/KCNQ1/EPHB1/EFHD2/CTNNB1/ITGB2/CTSD/KCNE3/VCL/EFNB1/ICAM1/HK1/ITGAM/ADTRP/CORO1C	36	Up
BP	GO:0032496	response to lipopolysaccharide	41/583	357/18805	0.114846	3.70442	9.22774	4.92177e-13	7.9257e-10	6.17035e-10	MAPKAPK2/LYN/MPO/LITAF/CSF2RB/HCK/PTAFR/AKIRIN2/CTR9/RARA/TNFRSF1B/TLR2/CDK19/PLCG2/LILRA2/TAB2/FOSL2/TNIP1/MAPKAPK3/SBNO2/NOTCH1/IL1B/HDAC5/PPARD/PRKCE/IFNAR1/CEBPB/NR1D1/BPI/MMP9/LILRB2/TLR5/MYD88/SLC11A1/PDE4B/IRAK3/FCAR/MMP8/XIAP/CAMP/IL12RB2	41	Up
BP	GO:0030099	myeloid cell differentiation	45/583	455/18805	0.0989011	3.19011	8.45893	6.75334e-12	6.30257e-09	4.90671e-09	KLF13/ACTN1/SPI1/SRF/ADAR/PIK3CD/ZFP36L1/LYN/GAB2/WDR1/NEDD9/RASGRP4/TGFB1/CSF3R/HSPA1A/INPP5D/RASSF2/CTR9/IKZF1/RARA/TLR2/RBPJ/FOSL2/TOB2/PTK2B/SBNO2/TGFBR2/SNRK/KCNQ1/BCL6/CTNNB1/FES/CEBPB/FOXO3/PARP1/MMP9/MYD88/EPAS1/CCR1/LILRB4/LTBR/ZBTB7A/TESC/RIPK1/CSF1R	45	Up
BP	GO:0002768	immune response-regulating cell surface receptor signaling pathway	40/583	372/18805	0.107527	3.46834	8.60082	7.82766e-12	6.30257e-09	4.90671e-09	FFAR2/PRKCB/C5AR1/PIK3CD/LYN/FCGR2A/PRKCD/INPP5D/HCK/C5AR2/SYK/CREBBP/IKBKG/TLR2/CRKL/SPPL3/PLCG2/LILRA2/FCHO1/LAT2/FOSL2/FPR1/NFAM1/LCP2/THEMIS2/NINJ1/FPR2/PRKCE/NR1D1/FCGR3B/LILRB2/TLR5/MYD88/PDE4B/MNDA/FCAR/LILRB4/ITGAM/SH2B2/CLEC4E	40	Up
BP	GO:0006909	phagocytosis	31/583	238/18805	0.130252	4.20136	8.89023	1.44558e-11	9.97659e-09	7.76702e-09	RAB7A/LYN/DOCK2/TGFB1/FCGR2A/PECAM1/NCF2/NCF4/PRKCD/HCK/SYK/RARA/ICAM3/TLR2/UNC13D/PLCG2/CEACAM4/FPR2/PRKCE/ITGB2/GSN/LYST/ADORA2A/MYD88/SLC11A1/ITGAM/TGM2/SIRPB1/CAMK1D/CORO1C/MARCO	31	Up
BP	GO:0050727	regulation of inflammatory response	43/583	442/18805	0.0972851	3.13799	8.1359	3.45295e-11	2.08515e-08	1.62334e-08	FFAR2/ALOX5/LYN/TGFB1/PRKCD/HCK/SYK/TNFRSF1A/TNFRSF1B/TLR2/ALOX5AP/PLCG2/NLRP12/FURIN/NEAT1/TNIP1/SBNO2/HLA-E/ADAM8/NINJ1/IL1B/BCL6/PPARD/OSM/FPR2/EXTL3/CEBPB/NR1D1/DAGLB/ESR1/MMP9/NLRC4/ADORA2A/MYD88/CASP4/MGLL/LILRA5/VPS35/MMP8/XIAP/RIPK1/IER3/FUT7	43	Up
CC	GO:0005925	focal adhesion	39/609	424/19880	0.0919811	3.0026	7.40977	1.09004e-09	7.16315e-08	5.8846e-08	ACTN1/VASP/SDCBP/GNB2/PACSIN2/NEDD9/HSPA1A/ACTN4/HCK/PXN/PDLIM7/ARHGAP26/FLII/ARHGEF2/ANXA5/ANXA6/FLOT1/IGF2R/SLC9A1/PLAUR/PTK2B/ACTG1/TNS1/CD44/ITGA5/CTNNB1/LPP/FES/ITGB2/GSN/VCL/PABPC1/ICAM1/TGM2/ARHGAP31/EHD3/FLT1/CORO1C/CD59	39	Up
MF	GO:0140375	immune receptor activity	24/600	156/18639	0.153846	4.77923	8.64467	1.96461e-10	1.88406e-07	1.62959e-07	C5AR1/IL1R2/CSF3R/FCGR2A/CSF2RB/C5AR2/LILRA6/CSF2RA/LILRA2/FPR1/IL1RAP/IL13RA1/CD44/IFNGR2/FPR2/IFNAR1/FCGR3B/LILRB2/CCR1/LILRA5/FCAR/LILRA1/LILRB4/IL12RB2	24	Up
BP	GO:0002444	myeloid leukocyte mediated immunity	19/583	116/18805	0.163793	5.28324	8.27694	2.86337e-09	6.28771e-07	4.89514e-07	SPI1/PIK3CD/LYN/GAB2/WDR1/FCGR2A/PTAFR/SYK/STXBP2/UNC13D/LAT2/HLA-E/FES/ITGB2/TREM1/FCGR3B/MYD88/FCAR/ITGAM	19	Up
MF	GO:0001221	transcription coregulator binding	19/600	115/18639	0.165217	5.13248	8.10702	4.54851e-09	2.18101e-06	1.88644e-06	SP1/STAT6/TRERF1/RARA/CREBBP/RXRA/ATF7/BCL6/HDAC5/PBX1/PPARD/CTNNB1/CHD6/NR1D1/FOXO3/ESR1/EPAS1/SMARCA4/ZBTB7A	19	Up
BP	GO:0002833	positive regulation of response to biotic stimulus	37/583	425/18805	0.0870588	2.80813	6.74393	1.71181e-08	2.85097e-06	2.21955e-06	FFAR2/SPI1/MAPKAPK2/LYN/RASGRP4/ALPK1/HSPA1A/HCK/RBM47/AKIRIN2/SYK/CREBBP/TLR2/FLOT1/PLCG2/LILRA2/LATS2/TNIP1/MAPKAPK3/HLA-E/ADAM8/NINJ1/SLC19A1/FPR2/PRKCE/NR1D1/PARP1/ESR1/NLRC4/TLR5/MYD88/MNDA/EPG5/IRAK3/XIAP/PTPRS/CLEC4E	37	Up
BP	GO:0032675	regulation of interleukin-6 production	22/583	177/18805	0.124294	4.00917	7.19468	3.20627e-08	4.42556e-06	3.44541e-06	MAPKAPK2/TGFB1/INPP5D/C5AR2/PTAFR/AKIRIN2/SYK/ARHGEF2/TLR2/MBP/PLCG2/LILRA2/NLRP12/IL1RAP/IL1B/CEBPB/BPI/LILRB2/MYD88/IRAK3/LILRA5/LILRB4	22	Up
BP	GO:0042327	positive regulation of phosphorylation	37/583	437/18805	0.0846682	2.73102	6.54898	3.54445e-08	4.75645e-06	3.70302e-06	SDCBP/LYN/NEDD9/TGFB1/PECAM1/PRKCD/CSNK1D/RASSF2/SYK/DHX34/PIK3R5/LIMK2/ARHGEF2/CACUL1/FLOT1/CRKL/PLCG2/TGFA/TAB2/RAF1/PIM1/SLCO3A1/PLAUR/PTK2B/LCP2/IL1B/ITGA5/OSM/MMP9/ENPP2/LILRA5/RIPK1/ADTRP/FLT1/TNFRSF10B/CCNY/CSF1R	37	Up
BP	GO:0051090	regulation of DNA-binding transcription factor activity	28/583	332/18805	0.0843373	2.72035	5.6569	1.79333e-06	0.000108295	8.431e-05	SPI1/SRF/HSPA1A/HCK/SYK/ARHGEF2/IKBKG/TLR2/TRIM8/SUFU/PLCG2/NLRP12/BCL3/PIM1/SLCO3A1/DAP/IL1B/HDAC5/PBX1/ESR1/NLRC4/MYD88/IRAK3/SMARCA4/ZBTB7A/RIPK1/CAMK1D/PRKCZ	28	Up
CC	GO:0030027	lamellipodium	20/609	203/19880	0.0985222	3.21613	5.64179	4.61412e-06	0.000120506	9.89973e-05	VASP/NEDD9/CAPZB/PXN/MYO9B/PSTPIP1/FLOT1/STX3/SLC9A1/PTK2B/SSH1/CD44/CTNNB1/DBNL/GSN/ARAP3/PABPC1/TESC/ARHGAP31/CORO1C	20	Up
BP	GO:0032868	response to insulin	27/583	324/18805	0.0833333	2.68796	5.48194	3.43103e-06	0.000182146	0.000141805	GNAI2/SP1/PRKCB/ZFP36L1/LYN/SORL1/PRKCD/MAPKAP1/SRSF4/TLR2/SLC9A1/RAF1/KCNQ1/EPHB1/IL1B/HDAC5/CTSD/ADIPOR1/PARP1/PTPRE/WDTC1/ZDHHC7/SH2B2/FLT1/FUT7/PRKCZ/CSF1R	27	Up
BP	GO:0070661	leukocyte proliferation	28/583	344/18805	0.0813953	2.62545	5.44236	3.57037e-06	0.000183707	0.00014302	LYN/DOCK2/TGFB1/CSF2RB/TYK2/PRKCD/INPP5D/STAT6/SYK/TNFRSF1B/CSF2RA/RASSF5/FOSL2/TGFBR2/HLA-E/IL1B/BCL6/CTNNB1/CEBPB/CCDC88B/LILRB2/MYD88/SLC11A1/EFNB1/MNDA/LILRB4/BID/CSF1R	28	Up
BP	GO:0009895	negative regulation of catabolic process	29/583	368/18805	0.0788043	2.54188	5.34307	4.52975e-06	0.0002256	0.000175635	MAPKAPK2/SORL1/TIMP2/N4BP1/TBC1D14/RBM47/DHX34/TIMP1/SUFU/TAB2/FURIN/CRTC3/DAP/IL1B/FOXK1/BANP/CLEC16A/MYD88/SLC11A1/PABPC1/NBAS/QSOX1/IRAK3/ZDHHC7/VPS35/HMGCR/HCAR2/IER3/SECISBP2	29	Up
MF	GO:0140996	histone H3 kinase activity	30/600	357/18639	0.0840336	2.6105	5.60342	1.7881e-06	0.000407058	0.00035208	PRKCB/MAPKAPK2/LYN/ALPK1/MARK2/TYK2/PRKCD/HCK/CSNK1D/SYK/ABL2/STK10/LIMK2/ULK1/SIK3/LATS2/RAF1/PIM1/MAPKAPK3/PTK2B/STK40/SNRK/MAST3/EPHB1/FES/MINK1/RIPK1/NEK9/FLT1/CSF1R	30	Up
MF	GO:0035173	histone kinase activity	30/600	360/18639	0.0833333	2.58875	5.55136	2.12231e-06	0.000407058	0.00035208	PRKCB/MAPKAPK2/LYN/ALPK1/MARK2/TYK2/PRKCD/HCK/CSNK1D/SYK/ABL2/STK10/LIMK2/ULK1/SIK3/LATS2/RAF1/PIM1/MAPKAPK3/PTK2B/STK40/SNRK/MAST3/EPHB1/FES/MINK1/RIPK1/NEK9/FLT1/CSF1R	30	Up
CC	GO:0002102	podosome	8/609	41/19880	0.195122	6.3695	6.11814	2.89632e-05	0.000579263	0.000475871	WDR1/SH3GL1/FLII/DOCK5/ADAM8/DBNL/GSN/VCL	8	Up
BP	GO:1903829	positive regulation of protein localization	34/583	499/18805	0.0681363	2.19777	4.85054	1.6317e-05	0.000640902	0.000498958	FFAR2/NADK/PRKCB/NEDD9/TGFB1/SORL1/PECAM1/TYK2/PRKCD/LIMK2/CREBBP/TLR2/TRIM8/CRKL/NPEPPS/STX3/OAZ2/SSH1/ADAM8/BCAP31/IL1B/PPARD/PRKCE/ITGB2/PARP1/ADORA2A/EDEM1/ITGAM/VPS35/GOLPH3/HCAR2/PIAS1/PRKCZ/SREBF2	34	Up
MF	GO:0141003	histone H2AX kinase activity	29/600	354/18639	0.0819209	2.54487	5.352	4.38451e-06	0.000681127	0.000589131	MAPKAPK2/LYN/ALPK1/MARK2/TYK2/PRKCD/HCK/CSNK1D/SYK/ABL2/STK10/LIMK2/ULK1/SIK3/LATS2/RAF1/PIM1/MAPKAPK3/PTK2B/STK40/SNRK/MAST3/EPHB1/FES/MINK1/RIPK1/NEK9/FLT1/CSF1R	29	Up
MF	GO:0003712	transcription coregulator activity	36/600	495/18639	0.0727273	2.25927	5.17875	4.97173e-06	0.000681127	0.000589131	DNMT3A/HSPA1A/TLE3/ACTN4/BASP1/ARID1A/KDM3B/MAML3/AKIRIN2/TRERF1/CREBBP/TBL1X/TRIM8/SUFU/MED16/BCL3/CRTC3/TOB2/BCORL1/NOTCH1/ATF7IP/DNAJB1/CTNNB1/ZMIZ1/DTX1/MED15/KAT6B/KMT2C/RAD54L2/SMARCA4/NCOR2/HIRA/MED29/PIAS1/SSBP3/MED26	36	Up
BP	GO:0046849	bone remodeling	12/583	91/18805	0.131868	4.25348	5.56477	2.38343e-05	0.000828372	0.000644908	RAB7A/INPP5D/RASSF2/SYK/PLEKHM1/RAB3D/DOCK5/TPP1/PTK2B/ADAM8/CTNNB1/CSF1R	12	Up
CC	GO:0098685	Schaffer collateral - CA1 synapse	12/609	98/19880	0.122449	3.99719	5.28744	4.50904e-05	0.000829663	0.000681577	CAPZB/SNX27/FBXL20/STX3/NTNG2/PTK2B/ACTG1/NOTCH1/ABR/CTNNB1/PTPRS/PRKCZ	12	Up
MF	GO:0071889	14-3-3 protein binding	8/600	33/18639	0.242424	7.53091	6.84815	7.49585e-06	0.000898566	0.000777202	TBC1D22A/ZFP36L1/TMCC3/TBC1D22B/FOXK1/PRKCE/ESR1/PRKCZ	8	Up
BP	GO:0022604	regulation of cell morphogenesis	20/583	247/18805	0.0809717	2.61179	4.56092	9.32109e-05	0.00244729	0.00190528	AGO4/WDR1/MARK2/HCK/F11R/CAPZB/PLXNC1/NTNG2/PTK2B/CD44/CDC42EP4/RREB1/FES/ITGB2/DBN1/CDC42EP3/ENPP2/CUX2/CORO1C/CSF1R	20	Up
BP	GO:0016032	viral process	28/583	421/18805	0.0665083	2.14526	4.25097	0.00013587	0.00326562	0.00254236	RAB7A/SELPLG/SP1/ADAR/IFITM2/HSPA1A/N4BP1/F11R/ANPEP/TRIM8/IGF2R/FURIN/OAZ2/ST3GAL4/TNIP1/VPS37C/NOTCH1/CTDP1/ITGA5/JUN/APOBEC3A/ST6GALNAC2/PABPC1/ICAM1/ATG16L2/SMARCA4/CTSL/CSF1R	28	Up
BP	GO:0033619	membrane protein proteolysis	9/583	64/18805	0.140625	4.53594	5.06827	0.000149789	0.0035299	0.00274811	TGFB1/TIMP2/TNFRSF1B/TIMP1/SPPL3/FURIN/ADAM19/ADAM8/IL1B	9	Up
BP	GO:1901136	carbohydrate derivative catabolic process	20/583	258/18805	0.0775194	2.50043	4.34061	0.000168275	0.00392723	0.00305745	TGFB1/PRKCD/CDA/OGDH/HK2/PFKFB3/NPL/MANBA/CD44/CHIT1/FOXK1/AMPD3/LYVE1/PDE4B/EDEM1/HK1/ZBTB7A/IER3/CTSL/SAMHD1	20	Up
BP	GO:0140888	interferon-mediated signaling pathway	12/583	112/18805	0.107143	3.45595	4.66285	0.000185146	0.00417962	0.00325394	ADAR/IFITM2/TYK2/HCK/RBM47/RAF1/GIGYF2/IFNGR2/IFNAR1/MYD88/EPG5/SAMHD1	12	Up
CC	GO:0008305	integrin complex	6/609	31/19880	0.193548	6.31813	5.26774	0.000308751	0.00443829	0.0036461	LYN/ITGAX/ITGA5/ITGB2/ITGA9/ITGAM	6	Up
BP	GO:0045730	respiratory burst	7/583	40/18805	0.175	5.64473	5.2599	0.000203326	0.00448523	0.00349186	PIK3CD/MPO/NCF2/NCF4/HCK/SLC11A1/CAMK1D	7	Up
BP	GO:0050994	regulation of lipid catabolic process	9/583	67/18805	0.134328	4.33284	4.88823	0.000214179	0.00466081	0.00362855	SORL1/PRKCD/CRTC3/IL1B/PRKCE/ABHD5/DAGLB/MLYCD/HCAR2	9	Up
BP	GO:0022411	cellular component disassembly	29/583	456/18805	0.0635965	2.05134	4.06519	0.000222509	0.00479885	0.00373602	PRKCB/WDR1/NEDD9/TGFB1/ARID1A/SH3GL1/NFE2/PLXNC1/MAP1S/FLII/ARHGEF2/FLOT1/FURIN/MID1IP1/IQSEC1/GIGYF2/ADAM8/ASCC2/IL1B/GSN/CLEC16A/MMP9/EPG5/IRAK3/MAP1LC3B2/SMARCA4/ITGAM/MMP8/KLC1	29	Up
BP	GO:1904951	positive regulation of establishment of protein localization	23/583	331/18805	0.0694864	2.24132	4.07549	0.000283771	0.00583361	0.00454161	FFAR2/NADK/PRKCB/TGFB1/SORL1/PRKCD/TLR2/NPEPPS/OAZ2/ADAM8/BCAP31/IL1B/PPARD/PRKCE/ITGB2/ADORA2A/EDEM1/ITGAM/VPS35/GOLPH3/HCAR2/PRKCZ/SREBF2	23	Up
MF	GO:0001217	DNA-binding transcription repressor activity	22/600	278/18639	0.0791367	2.45838	4.46801	0.000102774	0.00616003	0.00532803	SPI1/MXD1/RARA/SKI/BACH2/KLF16/ATF7/BCL6/PPARD/PLAGL1/JUN/SATB1/FOXK1/CEBPB/NR1D1/FOXO3/NACC2/CUX2/ZBTB7A/ZBTB4/NFIL3/SREBF2	22	Up
MF	GO:0031267	small GTPase binding	22/600	283/18639	0.0777385	2.41495	4.37435	0.000133053	0.0073138	0.00632597	RAB7A/DOCK2/SORL1/RIN3/NCF2/MAPKAP1/MYO9B/TMEM127/RAB11FIP1/NDRG1/ARHGEF2/DOCK5/ULK1/UNC13D/EHD1/SYTL3/PICALM/CDC42EP4/CDC42EP3/BICD2/PLEKHG3/CORO1C	22	Up
CC	GO:0017053	transcription repressor complex	9/609	79/19880	0.113924	3.7189	4.30444	0.000683145	0.00849315	0.00697721	SP1/MXD1/AKIRIN2/SKI/TBL1X/RBPJ/CTNNB1/FOXO3/NCOR2	9	Up
BP	GO:0071887	leukocyte apoptotic process	12/583	124/18805	0.0967742	3.12151	4.23952	0.000477297	0.00865541	0.00673845	PIK3CD/LYN/PLEKHO2/CRKL/BCL3/CD27/ADAM8/BCL6/FCAR/RIPK1/HCAR2/CTSL	12	Up
BP	GO:1903054	negative regulation of extracellular matrix organization	5/583	22/18805	0.227273	7.33081	5.31434	0.000478368	0.00865541	0.00673845	TGFB1/TNFRSF1A/TNFRSF1B/NOTCH1/ADTRP	5	Up
MF	GO:0051019	mitogen-activated protein kinase binding	6/600	28/18639	0.214286	6.65679	5.46302	0.000223225	0.00990787	0.00856967	MAPKAPK2/PTAFR/TNIP1/MAPKAPK3/ATF7/DUSP1	6	Up
BP	GO:0002460	adaptive immune response based on somatic recombination of immune receptors built from immunoglobulin superfamily domains	25/583	396/18805	0.0631313	2.03634	3.72816	0.000657937	0.0108481	0.00844551	SECTM1/TGFB1/FCGR2A/CSF2RB/TYK2/PRKCD/INPP5D/STAT6/TNFRSF1B/BACH2/UNC13D/BCL3/HLA-E/CD27/NOTCH1/IL1B/BCL6/FCGR3B/MYD88/SLC11A1/ICAM1/LILRB4/CD7/FUT7/PRKCZ	25	Up
BP	GO:0042060	wound healing	27/583	450/18805	0.06	1.93533	3.59217	0.000880738	0.0132559	0.01032	SRF/ALOX5/LYN/TGFB1/PRKCD/F11R/LRG1/SYK/ENTPD1/ANXA5/TIMP1/PLCG2/RAF1/PLAUR/ST3GAL4/ACTG1/DGKG/PPARD/CD44/ITGA5/RREB1/PRKCE/VCL/ADORA2A/SLC11A1/ADTRP/CD59	27	Up
BP	GO:0150105	protein localization to cell-cell junction	5/583	25/18805	0.2	6.45111	4.8783	0.000893771	0.0132559	0.01032	PECAM1/F11R/ACTG1/VCL/ZDHHC7	5	Up
BP	GO:0046339	diacylglycerol metabolic process	5/583	26/18805	0.192308	6.203	4.7486	0.00107865	0.0150171	0.0116912	DGAT2/PGS1/DGKG/DAGLB/PLB1	5	Up
BP	GO:0060324	face development	7/583	53/18805	0.132075	4.26017	4.25124	0.00118791	0.0163965	0.0127651	SRF/TGFB1/CHD7/RARA/SKI/RAF1/CRISPLD2	7	Up
MF	GO:0005543	phospholipid binding	30/600	497/18639	0.0603622	1.87515	3.60651	0.000775204	0.0181646	0.0157112	PREX1/SDCBP/GAB2/PACSIN2/NCF4/PXK/PTAFR/SBF2/MAPKAP1/SNX27/ARHGAP26/FLII/PITPNA/ANXA5/ANXA6/PSAP/TPP1/SLC9A1/SYTL3/PICALM/KCNQ1/FES/GSN/ITPR2/ARAP3/FCGR3B/MAP1LC3B2/GOLPH3/GRAMD1B/TOM1L2	30	Up
MF	GO:0140823	histone H2BS36 kinase activity	18/600	245/18639	0.0734694	2.28233	3.68479	0.00101874	0.0181646	0.0157112	MAPKAPK2/ALPK1/MARK2/CSNK1D/STK10/LIMK2/ULK1/SIK3/LATS2/RAF1/PIM1/MAPKAPK3/STK40/SNRK/MAST3/MINK1/RIPK1/NEK9	18	Up
MF	GO:0140855	histone H3S57 kinase activity	18/600	245/18639	0.0734694	2.28233	3.68479	0.00101874	0.0181646	0.0157112	MAPKAPK2/ALPK1/MARK2/CSNK1D/STK10/LIMK2/ULK1/SIK3/LATS2/RAF1/PIM1/MAPKAPK3/STK40/SNRK/MAST3/MINK1/RIPK1/NEK9	18	Up
MF	GO:0140995	histone H2A kinase activity	18/600	245/18639	0.0734694	2.28233	3.68479	0.00101874	0.0181646	0.0157112	MAPKAPK2/ALPK1/MARK2/CSNK1D/STK10/LIMK2/ULK1/SIK3/LATS2/RAF1/PIM1/MAPKAPK3/STK40/SNRK/MAST3/MINK1/RIPK1/NEK9	18	Up
MF	GO:0140997	histone H4 kinase activity	18/600	245/18639	0.0734694	2.28233	3.68479	0.00101874	0.0181646	0.0157112	MAPKAPK2/ALPK1/MARK2/CSNK1D/STK10/LIMK2/ULK1/SIK3/LATS2/RAF1/PIM1/MAPKAPK3/STK40/SNRK/MAST3/MINK1/RIPK1/NEK9	18	Up
MF	GO:0140998	histone H2B kinase activity	18/600	245/18639	0.0734694	2.28233	3.68479	0.00101874	0.0181646	0.0157112	MAPKAPK2/ALPK1/MARK2/CSNK1D/STK10/LIMK2/ULK1/SIK3/LATS2/RAF1/PIM1/MAPKAPK3/STK40/SNRK/MAST3/MINK1/RIPK1/NEK9	18	Up
MF	GO:0140857	histone H3T45 kinase activity	18/600	246/18639	0.0731707	2.27305	3.66569	0.00106716	0.0181646	0.0157112	MAPKAPK2/ALPK1/MARK2/CSNK1D/STK10/LIMK2/ULK1/SIK3/LATS2/RAF1/PIM1/MAPKAPK3/STK40/SNRK/MAST3/MINK1/RIPK1/NEK9	18	Up
MF	GO:0038024	cargo receptor activity	8/600	65/18639	0.123077	3.82338	4.15856	0.00110407	0.0181646	0.0157112	SORL1/CXCL16/LGALS3BP/ITGB2/LYVE1/ENPP2/ITGAM/MARCO	8	Up
MF	GO:0140801	histone H2AXY142 kinase activity	11/600	115/18639	0.0956522	2.97143	3.86752	0.00121157	0.0187402	0.0162091	LYN/TYK2/PRKCD/HCK/SYK/ABL2/PTK2B/EPHB1/FES/FLT1/CSF1R	11	Up
MF	GO:0019865	immunoglobulin binding	5/600	26/18639	0.192308	5.97404	4.62867	0.00127541	0.0194146	0.0167924	FCGR2A/FCGRT/LILRA2/FCGR3B/FCAR	5	Up
BP	GO:0035821	modulation of process of another organism	11/583	123/18805	0.0894309	2.88464	3.75087	0.00155327	0.0200281	0.0155924	SP1/IFITM2/TRIM8/IGF2R/CTDP1/JUN/GSN/EPG5/SMARCA4/CAMP/CSF1R	11	Up
BP	GO:0035265	organ growth	14/583	181/18805	0.0773481	2.49491	3.61475	0.00157153	0.0200281	0.0155924	BASP1/RARA/SKI/RBPJ/PSAP/MIR548C/LATS2/PIM1/FOSL2/TGFBR2/NOTCH1/CTDP1/FES/ESR1	14	Up
MF	GO:0001540	amyloid-beta binding	9/600	83/18639	0.108434	3.36849	3.94401	0.00138004	0.0206431	0.017855	SORL1/ITM2B/TLR2/PICALM/FPR2/ITGB2/LILRB2/ITGAM/MARCO	9	Up
MF	GO:0005149	interleukin-1 receptor binding	4/600	16/18639	0.25	7.76625	4.93801	0.0014207	0.0206431	0.017855	IL1RN/IL1B/TLR5/MYD88	4	Up
CC	GO:0098636	protein complex involved in cell adhesion	7/609	58/19880	0.12069	3.93975	3.9857	0.00189814	0.0207311	0.0170308	LYN/PLAUR/ITGAX/ITGA5/ITGB2/ITGA9/ITGAM	7	Up
BP	GO:0006690	icosanoid metabolic process	11/583	124/18805	0.0887097	2.86138	3.7197	0.00165801	0.0208589	0.0162392	ALOX5/MAPKAPK2/SYK/TNFRSF1A/TLR2/ALOX5AP/TBXAS1/IL1B/DAGLB/NLRC4/MGLL	11	Up
BP	GO:0140895	cell surface toll-like receptor signaling pathway	8/583	72/18805	0.111111	3.58395	3.92924	0.00170199	0.0213567	0.0166267	LYN/TLR2/LILRA2/NINJ1/PRKCE/NR1D1/TLR5/MYD88	8	Up
BP	GO:0036294	cellular response to decreased oxygen levels	13/583	163/18805	0.0797546	2.57253	3.60668	0.00173541	0.0215878	0.0168067	ZFP36L1/DNMT3A/TGFB1/NDRG1/NPEPPS/SLC9A1/CPEB4/NOTCH1/ADAM8/PPARD/PRKCE/FOXO3/EPAS1	13	Up
BP	GO:0141193	nuclear receptor-mediated signaling pathway	14/583	183/18805	0.0765027	2.46764	3.56856	0.00174296	0.0215878	0.0168067	ACTN4/TRERF1/RARA/CRKL/RXRA/PIM1/ZMIZ1/PARP1/ESR1/SMARCA4/ZDHHC7/NCOR2/ZBTB7A/PADI2	14	Up
BP	GO:0031334	positive regulation of protein-containing complex assembly	15/583	205/18805	0.0731707	2.36016	3.50246	0.00188523	0.022712	0.0176819	VASP/TGFB1/HSPA1A/HCK/SYK/PLCG2/LATS2/PTK2B/CDC42EP4/PRKCE/FES/MYD88/CDC42EP3/CLIP1/BID	15	Up
BP	GO:2000136	regulation of cell proliferation involved in heart morphogenesis	4/583	18/18805	0.222222	7.16791	4.68281	0.00197843	0.023426	0.0182377	RBPJ/PIM1/NOTCH1/CTNNB1	4	Up
BP	GO:2000108	positive regulation of leukocyte apoptotic process	5/583	30/18805	0.166667	5.37593	4.29044	0.0021101	0.0244458	0.0190316	PIK3CD/LYN/ADAM8/FCAR/HCAR2	5	Up
BP	GO:0030278	regulation of ossification	11/583	128/18805	0.0859375	2.77196	3.59805	0.00213627	0.0245722	0.0191301	ALOX5/TGFB1/RBPJ/RXRA/TOB2/PTK2B/NOTCH1/PBX1/SLC8A1/CCR1/CHSY1	11	Up
CC	GO:0005938	cell cortex	20/609	325/19880	0.0615385	2.00884	3.25979	0.00258618	0.0253115	0.0207937	ACTN1/PRKCB/WDR1/NEDD9/ACTN4/CAPZB/PXN/MYO9B/FLOT1/PTK2B/CTNNB1/DBNL/GSN/DBN1/ITPR2/VCL/CLIP1/CYTIP/CORO1C/PRKCZ	20	Up
MF	GO:0005178	integrin binding	13/600	161/18639	0.0807453	2.50835	3.50556	0.00215996	0.0291747	0.0252343	ACTN1/LYN/ACTN4/F11R/SYK/ICAM3/ITGAX/IL1B/ITGA5/ITGB2/ITGA9/ICAM1/ITGAM	13	Up
BP	GO:0043171	peptide catabolic process	4/583	20/18805	0.2	6.45111	4.36271	0.00298235	0.0311341	0.0242387	CPQ/ANPEP/TPP1/NPEPPS	4	Up
BP	GO:0048703	embryonic viscerocranium morphogenesis	3/583	10/18805	0.3	9.67667	4.909	0.00302254	0.0311341	0.0242387	CHST11/NDST1/MTHFD1L	3	Up
BP	GO:1905874	regulation of postsynaptic density organization	4/583	21/18805	0.190476	6.14392	4.21863	0.00359485	0.0359097	0.0279566	PTK2B/IL1RAP/LILRB2/PTPRS	4	Up
MF	GO:0031490	chromatin DNA binding	11/600	128/18639	0.0859375	2.66965	3.45688	0.00285314	0.0369751	0.0319811	SRF/ACTN4/KDM3B/RARA/CREBBP/SBNO2/NOTCH1/BCL6/CEBPB/FOXO3/SMARCA4	11	Up
BP	GO:0002931	response to ischemia	7/583	65/18805	0.107692	3.47368	3.57336	0.00390192	0.0376251	0.029292	PPIF/CPEB4/PTK2B/HK2/ITGAM/MLYCD/CSF1R	7	Up
BP	GO:0060742	epithelial cell differentiation involved in prostate gland development	3/583	11/18805	0.272727	8.79697	4.62673	0.00406089	0.0382421	0.0297724	PSAP/NOTCH1/CTNNB1	3	Up
BP	GO:0098698	postsynaptic specialization assembly	5/583	36/18805	0.138889	4.47994	3.73821	0.00479299	0.0433613	0.0337579	CRKL/NTNG2/PTK2B/IL1RAP/PTPRS	5	Up
MF	GO:0042288	MHC class I protein binding	4/600	20/18639	0.2	6.213	4.25396	0.00341482	0.0436642	0.0377668	PILRA/HLA-E/BCAP31/LILRB2	4	Up
BP	GO:1990858	cellular response to lectin	4/583	23/18805	0.173913	5.60967	3.95661	0.00506458	0.0448936	0.0349507	LYN/SYK/CREBBP/PLCG2	4	Up
BP	GO:2000651	positive regulation of sodium ion transmembrane transporter activity	3/583	12/18805	0.25	8.06389	4.37823	0.00529083	0.0458887	0.0357255	ACTN4/SLC9A1/TESC	3	Up
MF	GO:0033293	monocarboxylic acid binding	8/600	79/18639	0.101266	3.14582	3.48568	0.00385844	0.0486874	0.0421115	RARA/ALOX5AP/PSAP/RXRA/IGF2R/STX3/PYGL/PPARD	8	Up
BP	GO:0046835	carbohydrate phosphorylation	4/583	24/18805	0.166667	5.37593	3.83688	0.00593079	0.0494708	0.0385143	FGGY/HK2/PFKFB3/HK1	4	Up
