# Supplementary material
Source: Research Square preprint supplement (doi:10.21203/rs.3.rs-9529401/v1)
Supplement: Supplementary file 8 [file 9159bc128d5a1b75e01b8b12.xlsx]

## Sheet: Bulk
unique_cluster	comparison	cluster	dir	ONTOLOGY	ID	Description	GeneRatio	BgRatio	RichFactor	FoldEnrichment	zScore	pvalue	p.adjust	qvalue	geneID	Count
celltypes.CD4 T cell.down	celltypes	CD4 T cell	down	BP	GO:0002250	adaptive immune response	144/2018	415/14457	0.346988	2.48583	12.37	2.10587e-27	1.18371e-23	8.79145e-24	JAK1/BRD4/HLA-F/RC3H2/EP300/CSK/DBNL/RC3H1/HLA-A/ZBTB1/NFKB2/STAT6/OPA1/BTN3A2/NSD2/HLA-B/CTNNBL1/RORA/NBN/BTN3A1/HLA-C/WAS/NCKAP1L/BTN3A3/DCLRE1C/HMGB1/BRD2/ADAM17/LIG4/TRAF6/SOCS5/ADCY7/GZMM/CYRIB/CD226/MR1/MYD88/RELB/SAMSN1/MARCHF8/CD84/TAP1/SLAMF1/MAD2L2/LAIR1/OTUD7B/BCL6/ZC3H12A/SPN/CD69/SANBR/RIPK3/TFRC/JAK2/DUSP22/PCYT1A/MICB/TGFB1/IL4R/AKIRIN2/SASH3/TAP2/STAT4/LGALS1/DENND1B/LAX1/PRKCD/PT…	144
celltypes.CD4 T cell.down	celltypes	CD4 T cell	down	BP	GO:0051249	regulation of lymphocyte activation	148/2018	465/14457	0.31828	2.28016	11.3017	8.9639e-24	2.5193e-20	1.8711e-20	BRD4/BLOC1S6/SELENOK/AP3D1/IL2RG/ZFP36L2/RC3H2/EP300/DLG1/LAPTM5/CSK/SMARCD2/RASAL3/RC3H1/HLA-A/CTNNB1/ZBTB1/SH3KBP1/PDPK1/BMI1/STAT6/AKT1/PRELID1/DOCK8/RHOA/OPA1/NSD2/SMARCE1/AP3B1/KAT5/CASP3/ARID1B/BRAF/SOS1/NCKAP1L/FBXO7/SCRIB/HMGB1/BRD2/PRNP/PCID2/TRAF6/SOCS5/CYRIB/CCDC88B/MYD88/SAMSN1/SOS2/CLPTM1/TCF3/RNF41/LGALS3/FOXO3/THEMIS2/SLAMF1/MAD2L2/ZNF335/BCL2/CARD11/CBLB/BCL6/ZC3H12A/SPN/ABL1/CD69…	148
celltypes.CD4 T cell.down	celltypes	CD4 T cell	down	BP	GO:0002429	immune response-activating cell surface receptor signaling pathway	105/2018	287/14457	0.365854	2.62098	11.1719	2.95271e-22	5.5324e-19	4.10893e-19	TAX1BP1/RC3H2/EP300/LAPTM5/CSK/ELF1/RC3H1/HLA-A/CREBBP/PDE4D/LIPA/PJA2/CRKL/RBCK1/NMI/BTN3A2/BTN2A1/PIK3R1/RAB29/BRAF/SOS1/BTN3A1/NCKAP1L/BTN3A3/PRNP/GRB2/TRAF6/CD226/MYD88/APPL1/UBR2/LGALS3/IRAK1/THEMIS2/SQSTM1/BCL2/CARD11/CBLB/ZC3H12A/ABL1/WDFY1/DUSP22/MICB/PTPRJ/DENND1B/IFI35/LAX1/ITPRIPL1/PRKCD/RFTN1/SLA2/PRKCB/BTN2A2/NFATC2/MAPK1/PDE4B/OAS1/TNFAIP3/RIPK2/CD81/CYBA/KLRK1/PLSCR1/EZR/MYO1G/LIMK…	105
celltypes.CD4 T cell.down	celltypes	CD4 T cell	down	BP	GO:1903131	mononuclear cell differentiation	147/2018	481/14457	0.305613	2.18942	10.6858	1.07271e-21	1.00495e-18	7.46382e-19	ITGA4/JAK1/BRD4/AP3D1/IL2RG/ZFP36L2/PDP2/LFNG/RC3H2/UCP2/EP300/RIPK1/SMARCD2/RC3H1/TUSC2/CTNNB1/ZBTB1/BMI1/STAT6/NFATC3/LIPA/L3MBTL3/PRELID1/QKI/RHOA/OPA1/HLA-B/SMARCE1/AP3B1/KAT5/RORA/PIK3R1/ARID1B/BRAF/SOS1/HDAC5/NCKAP1L/DCLRE1C/NR3C1/RBPJ/FBXO7/HMGB1/BRD2/ADAM17/MYH9/LIG4/PCID2/DOCK2/PARP1/JMJD6/TRAF6/ZBTB7A/SOCS5/MR1/MYD88/RELB/SLC39A7/SOS2/CLPTM1/TCF3/RNF41/FOXO3/SYVN1/SLAMF1/PTGER4/BCL2/CAR…	147
celltypes.CD4 T cell.down	celltypes	CD4 T cell	down	BP	GO:0042113	B cell activation	96/2018	255/14457	0.376471	2.69704	11.0124	1.78519e-21	1.43351e-18	1.06467e-18	ITGA4/IL2RG/ZFP36L2/LFNG/EP300/LAPTM5/RC3H1/ZBTB1/SH3KBP1/BMI1/STAT6/NSD2/PIK3R1/NBN/CASP3/HDAC5/NCKAP1L/DCLRE1C/RBPJ/ADAM17/LIG4/PCID2/ZBTB7A/SLC39A7/SAMSN1/TCF3/THEMIS2/SYVN1/MAD2L2/BCL2/CARD11/BCL6/ABL1/SANBR/TFRC/PCYT1A/TGFB1/AKIRIN2/SASH3/ZFP36L1/PTPRJ/LGALS1/LAX1/PRKCD/PTK2B/KLF6/PRKCB/NFATC2/IKZF3/TCIRG1/TNFAIP3/ITGB1/NOTCH2/BST2/CD81/CDKN1A/BCL3/CD38/INPP5D/CCR6/ID2/PAWR/TPD52/SLC15A4/KIT…	96
celltypes.CD4 T cell.down	celltypes	CD4 T cell	down	BP	GO:0002443	leukocyte mediated immunity	117/2018	360/14457	0.325	2.32831	10.2797	8.37221e-20	4.96465e-17	3.68726e-17	KIF5B/MAVS/HLA-F/LAMP1/HLA-A/TUSC2/ZBTB1/AP1G1/WDR1/SERPINB9/PDPK1/STAT6/BTN3A2/NSD2/HLA-B/VAMP8/STXBP2/PIK3R1/NBN/KMT2E/RIGI/HLA-C/WAS/NCKAP1L/BTN3A3/HMGB1/ADAM17/GRB2/LIG4/TRAF6/GZMM/CYRIB/CD226/MR1/MYD88/TUBB4B/CD84/SLAMF1/MAD2L2/HCST/SNAP23/BCL6/BCR/SPN/SANBR/RIPK3/TFRC/DUSP22/PCYT1A/TGFB1/IL4R/SASH3/TAP2/DENND1B/PRKCD/RNF19B/RFTN1/SLAMF6/CTSC/SLA2/TCIRG1/BST2/CD81/KLRK1/TNFRSF1B/CALHM6/BCL3/…	117
celltypes.CD4 T cell.down	celltypes	CD4 T cell	down	BP	GO:0002366	leukocyte activation involved in immune response	98/2018	276/14457	0.355072	2.54375	10.4296	8.83232e-20	4.96465e-17	3.68726e-17	JAK1/BRD4/HLA-F/PDP2/LFNG/RC3H2/LAMP1/EP300/RC3H1/AP1G1/PDPK1/STAT6/NMI/OPA1/NSD2/VAMP8/STXBP2/RORA/PIK3R1/NBN/NCKAP1L/HMGB1/BRD2/LIG4/DOCK2/SOCS5/MYD88/RELB/LGALS3/CD84/GRN/SLAMF1/MAD2L2/PTGER4/SNAP23/LCP1/BCL6/BCR/ZC3H12A/SPN/ABL1/ITGAL/CD69/SANBR/TFRC/PCYT1A/TGFB1/IL4R/STAT4/LGALS1/IFI35/PTK2B/SLAMF6/ANXA1/RIPK2/NOTCH2/CD81/BCL3/PIK3CG/SMAD7/CCR6/RAB27A/IL18R1/TBK1/PRKCE/FCER1G/SLC15A4/IRF4/KI…	98
celltypes.CD4 T cell.down	celltypes	CD4 T cell	down	BP	GO:0070661	leukocyte proliferation	100/2018	299/14457	0.334448	2.39599	9.8245	4.63218e-18	2.00288e-15	1.48755e-15	SELENOK/RC3H2/ALKBH5/DLG1/RASAL3/RC3H1/HLA-A/CTNNB1/BMI1/STAT6/LIPA/DOCK8/CASP3/SOS1/BTN3A1/NCKAP1L/SCRIB/HMGB1/PRNP/DOCK2/PSMB10/TRAF6/CCDC88B/MYD88/SOS2/TCF3/LGALS3/SLAMF1/ZNF335/BCL2/CARD11/ST6GAL1/CBLB/BCL6/SPN/ABL1/RIPK3/TFRC/JAK2/PCYT1A/NF1/TGFB1/MSN/ITCH/SASH3/CD151/PRKCD/GSTP1/BTN2A2/NFATC2/IKZF3/IRF1/PRKAR1A/TCIRG1/MAPK1/ANXA1/TNFAIP3/PPP3CA/RIPK2/BST2/CD81/ELF4/CDKN1A/TNFRSF1B/CD38/PIK3…	100
celltypes.CD4 T cell.down	celltypes	CD4 T cell	down	BP	GO:0046651	lymphocyte proliferation	89/2018	264/14457	0.337121	2.41514	9.34668	1.87438e-16	6.19758e-14	4.60296e-14	SELENOK/RC3H2/ALKBH5/DLG1/RASAL3/RC3H1/HLA-A/CTNNB1/BMI1/LIPA/DOCK8/CASP3/SOS1/BTN3A1/NCKAP1L/SCRIB/HMGB1/PRNP/DOCK2/PSMB10/TRAF6/CCDC88B/MYD88/SOS2/TCF3/LGALS3/SLAMF1/ZNF335/BCL2/CARD11/CBLB/BCL6/SPN/ABL1/RIPK3/TFRC/JAK2/PCYT1A/TGFB1/MSN/ITCH/SASH3/CD151/PRKCD/BTN2A2/NFATC2/IKZF3/IRF1/PRKAR1A/ANXA1/PPP3CA/RIPK2/CD81/ELF4/CDKN1A/TNFRSF1B/CD38/PIK3CG/INPP5D/TNFSF14/PAWR/PTPN22/FCRL3/FOSL2/CCL5/VAV…	89
celltypes.CD4 T cell.down	celltypes	CD4 T cell	down	BP	GO:0007159	leukocyte cell-cell adhesion	113/2018	376/14457	0.300532	2.15302	9.12442	2.51821e-16	7.86382e-14	5.84049e-14	ITGA4/BRD4/STK10/SELENOK/AP3D1/NFAT5/IL2RG/RC3H2/EP300/DLG1/LAPTM5/CSK/SMARCD2/RASAL3/RC3H1/HLA-A/ZBTB1/PDPK1/BMI1/AKT1/PPARA/DOCK8/RHOA/OPA1/SMARCE1/AP3B1/GOLPH3/KAT5/CASP3/ARID1B/ROCK1/NCKAP1L/SCRIB/HMGB1/BRD2/PRNP/FERMT3/TRAF6/SOCS5/CYRIB/CCDC88B/NT5E/LGALS3/IRAK1/FOXO3/TNIP1/SLAMF1/CARD11/F11R/CBLB/BCL6/ZC3H12A/SPN/ABL1/ITGAL/CD69/TFRC/JAK2/DUSP22/TGFB1/IL4R/MSN/ITCH/SASH3/LGALS1/LAX1/SMARCB1…	113
celltypes.CD4 T cell.down	celltypes	CD4 T cell	down	BP	GO:0046631	alpha-beta T cell activation	70/2018	184/14457	0.380435	2.72544	9.48733	2.76896e-16	8.19175e-14	6.08404e-14	JAK1/BRD4/AP3D1/IL2RG/PDP2/RC3H2/EP300/RASAL3/RC3H1/HLA-A/STAT6/RHOA/OPA1/AP3B1/RORA/PIK3R1/BRAF/NCKAP1L/HMGB1/BRD2/DOCK2/SOCS5/RELB/LGALS3/PTGER4/BCL2/CARD11/CBLB/BCL6/ZC3H12A/SPN/ABL1/CD69/CLEC2B/JAK2/IL4R/ITCH/SASH3/STAT4/LGALS1/SLAMF6/IRF1/TCIRG1/ANXA1/RIPK2/CD81/ELF4/TOX/BCL3/SMAD7/RUNX3/ZBTB16/IL18R1/TBK1/PRDM1/IRF4/FOSL2/CD300A/TBX21/CD83/EOMES/ZNF683/NKG7/KLRF1/HLA-DRA/HLA-DRB1/XCL1/WDFY4…	70
celltypes.CD4 T cell.down	celltypes	CD4 T cell	down	BP	GO:0002697	regulation of immune effector process	108/2018	362/14457	0.298343	2.13733	8.82676	2.0591e-15	5.03225e-13	3.73747e-13	BRD4/TMBIM6/IL2RG/MAVS/HLA-F/RC3H2/LAMP1/EP300/LAPTM5/RC3H1/HLA-A/ZBTB1/AP1G1/SERPINB9/PDPK1/STAT6/OPA1/NSD2/HLA-B/VAMP8/STXBP2/RIGI/HLA-C/WAS/NCKAP1L/HMGB1/BRD2/GRB2/TRAF6/SOCS5/CYRIB/CD226/MR1/MYD88/APPL1/LGALS3/CD84/DDX60/GRN/SLAMF1/MAD2L2/LITAF/BCL6/BCR/ZC3H12A/SPN/CD69/RIPK3/TFRC/DUSP22/UBE2J1/TGFB1/IL4R/SASH3/MAPKAPK2/TAP2/LGALS1/DENND1B/SLAMF6/ANXA1/RIPK2/CGAS/BST2/CD81/KLRK1/TNFRSF1B/CALH…	108
celltypes.CD4 T cell.down	celltypes	CD4 T cell	down	BP	GO:0070663	regulation of leukocyte proliferation	78/2018	234/14457	0.333333	2.38801	8.62177	2.78991e-14	6.03156e-12	4.47966e-12	SELENOK/DLG1/RASAL3/RC3H1/HLA-A/CTNNB1/BMI1/STAT6/CASP3/SOS1/NCKAP1L/SCRIB/HMGB1/PRNP/TRAF6/CCDC88B/MYD88/SOS2/TCF3/LGALS3/SLAMF1/ZNF335/BCL2/CARD11/ST6GAL1/CBLB/BCL6/SPN/RIPK3/TFRC/JAK2/NF1/TGFB1/ITCH/SASH3/GSTP1/BTN2A2/NFATC2/IKZF3/IRF1/PRKAR1A/MAPK1/ANXA1/TNFAIP3/PPP3CA/RIPK2/BST2/CD81/CDKN1A/TNFRSF1B/CD38/INPP5D/PAWR/PTPN22/KIT/FCRL3/CCL5/VAV3/CD74/HLA-DPB1/TNFRSF13C/CD300A/CD40/HLA-DMB/HLA-D…	78
celltypes.CD4 T cell.down	celltypes	CD4 T cell	down	BP	GO:1903037	regulation of leukocyte cell-cell adhesion	101/2018	344/14457	0.293605	2.10339	8.3424	5.29145e-14	1.06226e-11	7.88943e-12	ITGA4/BRD4/SELENOK/AP3D1/NFAT5/IL2RG/RC3H2/EP300/DLG1/LAPTM5/CSK/SMARCD2/RASAL3/RC3H1/HLA-A/ZBTB1/PDPK1/BMI1/AKT1/PPARA/DOCK8/RHOA/OPA1/SMARCE1/AP3B1/KAT5/CASP3/ARID1B/NCKAP1L/SCRIB/HMGB1/BRD2/PRNP/TRAF6/SOCS5/CYRIB/CCDC88B/LGALS3/IRAK1/FOXO3/SLAMF1/CARD11/CBLB/BCL6/ZC3H12A/SPN/ABL1/CD69/TFRC/JAK2/DUSP22/TGFB1/IL4R/ITCH/SASH3/LGALS1/LAX1/SMARCB1/BTN2A2/IRF1/PRKAR1A/ANXA1/PPP3CA/ZMIZ1/RIPK2/CD81/K…	101
celltypes.CD4 T cell.down	celltypes	CD4 T cell	down	BP	GO:0001909	leukocyte mediated cytotoxicity	53/2018	132/14457	0.401515	2.87646	8.72312	8.95046e-14	1.67702e-11	1.24553e-11	KIF5B/HLA-F/LAMP1/HLA-A/TUSC2/AP1G1/SERPINB9/HLA-B/STXBP2/PIK3R1/HLA-C/NCKAP1L/GRB2/GZMM/CYRIB/CD226/MR1/MYD88/TUBB4B/HCST/RIPK3/TGFB1/TAP2/RNF19B/SLAMF6/CTSC/KLRK1/INPP5D/RAB27A/STX7/KLRB1/LYST/TIGIT/CTSH/STAP1/KLRC3/ITGAM/IL18RAP/PRF1/KLRC2/NCR1/SLAMF7/KLRC1/KLRD1/NKG7/CX3CR1/TYROBP/HLA-DRA/GZMB/FCGR3A/HLA-DRB1/XCL1/LILRB1	53
celltypes.CD4 T cell.down	celltypes	CD4 T cell	down	BP	GO:0001906	cell killing	64/2018	181/14457	0.353591	2.53314	8.36004	2.81023e-13	5.09558e-11	3.78451e-11	KIF5B/HMGN2/HLA-F/GAPDH/LAMP1/HLA-A/TUSC2/AP1G1/SERPINB9/HLA-B/STXBP2/PIK3R1/HLA-C/NCKAP1L/GRB2/GZMM/CYRIB/CD226/MR1/MYD88/TUBB4B/GBP3/LGALS3/HCST/RIPK3/MICB/TGFB1/TAP2/H2BC12/RNF19B/SLAMF6/CTSC/APOL1/KLRK1/GBP5/INPP5D/RAB27A/STX7/KLRB1/LYST/TIGIT/CTSH/STAP1/KLRC3/ITGAM/IL18RAP/PRF1/KLRC2/GZMA/NCR1/SLAMF7/KLRC1/KLRD1/NKG7/CX3CR1/GNLY/TYROBP/HLA-DRA/GZMH/GZMB/FCGR3A/HLA-DRB1/XCL1/LILRB1	64
celltypes.CD4 T cell.down	celltypes	CD4 T cell	down	BP	GO:0019882	antigen processing and presentation	44/2018	101/14457	0.435644	3.12096	8.61526	3.81475e-13	6.70084e-11	4.97674e-11	PSMB8/AP3D1/HLA-F/HLA-A/RAB8B/DNM2/RAB6A/HLA-B/PIKFYVE/AP3B1/RAB35/HLA-C/WAS/PSME1/TAPBP/TRAF6/MR1/RELB/MARCHF8/TAP1/CTSD/TAPBPL/TAP2/RFTN1/CTSS/CD8A/RAB27A/FCER1G/HLA-DOA/CTSH/IFI30/CD74/HLA-DPB1/HLA-DMA/HLA-DMB/HLA-DPA1/HLA-DRA/HLA-DRB1/HLA-DQB1/WDFY4/HLA-DRB5/MARCHF1/HLA-DQA1/MPEG1	44
celltypes.CD4 T cell.down	celltypes	CD4 T cell	down	BP	GO:1902105	regulation of leukocyte differentiation	87/2018	295/14457	0.294915	2.11278	7.77768	2.33609e-12	3.75176e-10	2.78645e-10	BRD4/FBXW7/AP3D1/IL2RG/ZFP36L2/RC3H2/EP300/RIPK1/SMARCD2/RC3H1/CTNNB1/ZBTB1/PRELID1/QKI/RHOA/OPA1/HLA-B/SMARCE1/AP3B1/KAT5/PIK3R1/EVI2B/ARID1B/BRAF/SOS1/NCKAP1L/FBXO7/HMGB1/BRD2/PCID2/TRAF6/SOCS5/SOS2/CLPTM1/RNF41/FOXO3/CARD11/BCL6/ZC3H12A/ABL1/CD69/NF1/TOB2/TGFB1/KLF10/IL4R/NEDD9/PIAS3/SASH3/ZFP36L1/LGALS1/RASSF2/SMARCB1/RB1/BTN2A2/IKZF3/IRF1/ANXA1/PPP3CA/ZMIZ1/RIPK2/NOTCH2/TOX/INPP5D/SMAD7/RUNX…	87
celltypes.CD4 T cell.down	celltypes	CD4 T cell	down	BP	GO:0001819	positive regulation of cytokine production	115/2018	437/14457	0.263158	1.88527	7.56892	3.37419e-12	4.99114e-10	3.70694e-10	PARK7/XIAP/SELENOK/MAVS/HLA-F/GAPDH/LAPTM5/RIPK1/HLA-A/TUSC2/ZBTB20/TMED10/HSP90AA1/PDE4D/GSDMD/OPA1/ARNT/TRIM56/BTN3A2/FRMD8/RORA/PIK3R1/TMF1/LAMTOR5/HSPA1A/RIGI/BTN3A1/POU2F2/SCRIB/HMGB1/ADAM17/TRAF6/CYRIB/CD226/CCDC88B/MYD88/APPL1/SETD2/SMAD3/IRAK1/EIF2AK2/BSG/SLAMF1/PTGER4/TANK/CARD11/RIOK3/SPN/IFNGR1/KPNA2/ABL1/HIF1A/JAK2/IFIH1/TGFB1/IL4R/AKIRIN2/EIF2AK3/SASH3/MAPKAPK2/MBP/PTPRJ/DENND1B/BMPR…	115
celltypes.CD4 T cell.down	celltypes	CD4 T cell	down	BP	GO:0007264	small GTPase-mediated signal transduction	119/2018	458/14457	0.259825	1.86139	7.54533	3.52799e-12	5.08483e-10	3.77652e-10	GABARAP/PARK7/RALBP1/USO1/MAPKAP1/CFL1/RAB18/DENND4A/DBNL/RAC1/RASAL3/RAP1B/RAP2B/RRAGC/MFN2/LIPA/GNB1/CRKL/DOCK8/RALGAPA1/RHOA/GDI2/ARHGAP9/CUL3/MADD/GIT2/SHOC2/PHACTR4/RAB35/SOS1/ARHGAP19/RUFY1/SSX2IP/ROCK1/WAS/FAM13B/RAB4B/SRGAP2/ARAP1/GRB2/DOCK2/AKAP13/CYRIB/USP8/MAPRE2/SOS2/ARHGAP17/SIAH2/RGS19/RGL2/FARP2/RALGDS/ARF6/SQSTM1/GNA13/F11R/KSR1/BCL6/BCR/ABL1/RAP2C/ARHGAP25/RAP2A/MYO9B/TAX1BP3/RDX…	119
celltypes.CD4 T cell.down	celltypes	CD4 T cell	down	BP	GO:0045088	regulation of innate immune response	113/2018	429/14457	0.263403	1.88703	7.51207	4.90661e-12	6.72684e-10	4.99605e-10	TAX1BP1/PPP2CA/XIAP/ATG12/MAVS/HEXIM1/HLA-F/LAMP1/EP300/HLA-A/STAT2/CREBBP/PARP9/AP1G1/HSP90AA1/SERPINB9/PDPK1/AKT1/PJA2/NMI/TRIM56/HLA-B/AP3B1/KAT5/PIK3R1/NEK7/BIRC3/HSPA1A/PTPN1/RIGI/RNF115/HMGB1/OTULIN/GRB2/PARP1/TRAF6/CD226/MYD88/APPL1/GPR108/ABHD17A/NAGK/SIRT2/IRAK1/EIF2AK2/DDX60/TNIP1/GRN/YWHAZ/SQSTM1/RIOK3/WDFY1/IFIH1/TGFB1/AKIRIN2/ITCH/MAPKAPK2/IFI35/CPT1A/IFI16/CASP1/RFTN1/SLAMF6/GRAMD4/…	113
celltypes.CD4 T cell.down	celltypes	CD4 T cell	down	BP	GO:0050870	positive regulation of T cell activation	72/2018	236/14457	0.305085	2.18563	7.39663	3.28948e-11	3.77351e-09	2.8026e-09	BRD4/SELENOK/AP3D1/IL2RG/EP300/CSK/SMARCD2/RASAL3/HLA-A/ZBTB1/PDPK1/BMI1/AKT1/DOCK8/RHOA/OPA1/SMARCE1/AP3B1/KAT5/ARID1B/NCKAP1L/HMGB1/BRD2/TRAF6/SOCS5/CYRIB/CCDC88B/FOXO3/SLAMF1/CARD11/BCL6/SPN/ABL1/TFRC/JAK2/TGFB1/IL4R/SASH3/LGALS1/SMARCB1/BTN2A2/ANXA1/PPP3CA/ZMIZ1/RIPK2/CD81/KLRK1/RUNX3/ZBTB16/TNFSF14/HLA-DOA/DUSP10/ADAM8/MAP3K8/CCL5/CD74/HLA-DPB1/TNFRSF13C/HLA-DMA/HLA-DMB/CD83/HLA-DPA1/HLA-DRA…	72
celltypes.CD4 T cell.down	celltypes	CD4 T cell	down	BP	GO:0016050	vesicle organization	98/2018	364/14457	0.269231	1.92878	7.22856	3.47144e-11	3.86928e-09	2.87373e-09	VTI1B/USO1/RAB22A/HOOK3/BLOC1S6/ATP6V1E1/AP3D1/SAR1A/CSNK1D/CHMP4B/PAFAH1B1/CHMP4A/VPS4B/AP2M1/TMED9/UBR4/VPS36/ATP6AP1/TMED10/TRAPPC8/AP1G1/RAB14/CHMP1B/HPS1/VPS33A/DNM2/TRAPPC1/CUL3/CLCN3/PIKFYVE/ATP6V1D/AP3B1/VAMP8/GOLPH3/SEC24C/TMF1/RAB29/STX8/SNX3/RUFY1/RAB4B/SURF4/PLEKHA3/TSG101/VPS41/STAM2/ZFYVE16/ATP6V0C/SAMD9/BLOC1S1/USP8/PIP4K2A/ATP6V0B/BLOC1S2/IRAG2/SNX11/PI4K2A/CHMP1A/TRAPPC2/RAB8A/VP…	98
celltypes.CD4 T cell.down	celltypes	CD4 T cell	down	BP	GO:0010506	regulation of autophagy	94/2018	346/14457	0.271676	1.9463	7.17592	5.13102e-11	5.2439e-09	3.89466e-09	ATP6V0E1/EIF4G2/PARK7/FBXW7/HUWE1/STUB1/TMEM59/ATG12/RB1CC1/ATP6V1E1/GNAI3/OPTN/GAPDH/GOLGA2/PAFAH1B2/EP300/CSNK2A1/CHMP4B/VPS13C/UBR4/HERC1/RRAGC/AKT1/GSK3B/RAB3GAP2/ATP6V1D/VHL/KAT5/CASP3/HTRA2/DAPK3/ROCK1/HTT/WDR45/MTMR9/VDAC1/FBXO7/SNX5/VPS26A/FYCO1/HMGB1/ZMPSTE24/ATG2A/KDM4A/ATP6V0C/PIP4K2A/SETD2/SIRT2/RNF41/ATP6V0B/SNX30/FOXO3/RAB8A/SH3GLB1/CAPNS1/KEAP1/SQSTM1/BCL2/RMC1/PSAP/ZC3H12A/TBC1D25…	94
celltypes.CD4 T cell.down	celltypes	CD4 T cell	down	BP	GO:0031349	positive regulation of defense response	115/2018	456/14457	0.252193	1.80672	7.05043	6.28875e-11	6.20159e-09	4.60595e-09	PARK7/TAX1BP1/NEAT1/PPP2CA/XIAP/OPTN/MAVS/HEXIM1/HLA-F/LAMP1/EP300/RIPK1/CREBBP/PARP9/AP1G1/HSP90AA1/PDPK1/AKT1/PJA2/GSDMD/NMI/TRIM56/AP3B1/VAMP8/KAT5/PIK3R1/NEK7/BIRC3/CASP3/HSPA1A/RIGI/RNF115/HMGB1/OTULIN/PARP1/TRAF6/CD226/MYD88/APPL1/GPR108/ABHD17A/NAGK/GBP3/SIRT2/IRAK1/EIF2AK2/DDX60/TNIP1/GRN/PTGER4/SQSTM1/CASP4/RIOK3/WDFY1/ALOX5AP/IFIH1/TGFB1/AKIRIN2/ITCH/MAPKAPK2/LGALS1/IFI35/CPT1A/CAMK2N1/…	115
celltypes.CD4 T cell.down	celltypes	CD4 T cell	down	BP	GO:0016032	viral process	99/2018	384/14457	0.257812	1.84697	6.7754	3.82246e-10	3.3572e-08	2.4934e-08	P4HB/BRD4/DDX6/CFL1/ATG12/VCP/MAVS/HEXIM1/LAMP1/MGAT1/EP300/CHMP4B/GRK2/USF2/CHMP4A/VPS4B/DEK/PARP9/CHMP1B/MGAT2/CDK9/MON1B/FMR1/LARP7/GSK3B/ZFP36/PIKFYVE/ZBED1/VAMP8/LAMTOR5/HSPA1A/ATG16L2/EDEM2/WWP2/FAM111A/HMGB1/MYH9/LIG4/MGAT5/TSG101/ISG20/GALNT1/OAZ1/OAZ2/IGF2R/ST3GAL2/EIF2AK2/CHMP1A/TNIP1/BSG/RAB1B/VPS18/SLAMF1/TRIM38/SP100/BCL2/SRPK2/ST6GAL1/F11R/ZC3H12A/KPNA2/TFRC/UVRAG/IFIH1/ITCH/LGALS1/…	99
celltypes.CD4 T cell.down	celltypes	CD4 T cell	down	BP	GO:0002819	regulation of adaptive immune response	61/2018	196/14457	0.311224	2.22962	6.98097	4.3175e-10	3.73364e-08	2.77299e-08	BRD4/HLA-F/RC3H2/EP300/RC3H1/HLA-A/ZBTB1/STAT6/OPA1/NSD2/HLA-B/HLA-C/WAS/NCKAP1L/HMGB1/BRD2/TRAF6/SOCS5/ADCY7/CYRIB/CD226/MR1/SAMSN1/SLAMF1/MAD2L2/BCL6/ZC3H12A/SPN/CD69/RIPK3/TFRC/JAK2/DUSP22/TGFB1/IL4R/AKIRIN2/SASH3/TAP2/LGALS1/DENND1B/IRF1/ANXA1/TNFAIP3/RIPK2/CD81/TNFRSF1B/SMAD7/STX7/IL18R1/DUSP10/SLC15A4/CD40/TBX21/KLRC1/KLRD1/HLA-DRA/HLA-DRB1/BTK/MEF2C/XCL1/LILRB1	61
celltypes.CD4 T cell.down	celltypes	CD4 T cell	down	BP	GO:0002833	positive regulation of response to biotic stimulus	97/2018	376/14457	0.257979	1.84817	6.71197	5.55332e-10	4.59047e-08	3.40936e-08	TAX1BP1/PPP2CA/XIAP/MAVS/HEXIM1/HLA-F/LAMP1/EP300/CREBBP/PARP9/AP1G1/HSP90AA1/PDPK1/AKT1/PJA2/NMI/TRIM56/AP3B1/KAT5/PIK3R1/NEK7/BIRC3/HSPA1A/RIGI/RNF115/HMGB1/OTULIN/PARP1/TRAF6/CD226/MR1/MYD88/APPL1/GPR108/ABHD17A/NAGK/SIRT2/IRAK1/EIF2AK2/DDX60/TNIP1/GRN/SQSTM1/RIOK3/WDFY1/IFIH1/AKIRIN2/ITCH/MAPKAPK2/IFI35/CPT1A/IFI16/CASP1/RFTN1/SLAMF6/GRAMD4/CTSS/IRF1/OAS1/GFI1/TNFAIP3/RIPK2/CGAS/CYBA/KLRK1/PL…	97
celltypes.CD4 T cell.down	celltypes	CD4 T cell	down	BP	GO:0016236	macroautophagy	94/2018	364/14457	0.258242	1.85005	6.61585	9.71758e-10	7.69331e-08	5.71385e-08	ATP6V0E1/GABARAP/VTI1B/FBXW7/HUWE1/RAB2A/AUP1/STUB1/ATG4B/ATG12/RB1CC1/ATP6V1E1/GNAI3/VCP/OPTN/GAPDH/PAFAH1B2/CSNK2A1/CHMP4B/VPS13C/CHMP4A/VPS4B/VPS36/CHMP1B/MFN2/AKT1/RAB3GAP2/VPS33A/SNX14/PIKFYVE/ATP6V1D/VAMP8/KAT5/RNF213/CASP3/HTRA2/ATG16L2/HTT/WDR45/VDAC1/FBXO7/SNX5/VPS26A/FYCO1/ILRUN/TSG101/VPS41/ATG2A/STAM2/TRAF6/ATP6V0C/PIP4K2A/RNF41/ATP6V0B/SNX30/CHMP1A/RAB1B/SH3GLB1/CAPNS1/SQSTM1/CTSD/MA…	94
celltypes.CD4 T cell.down	celltypes	CD4 T cell	down	BP	GO:0050900	leukocyte migration	86/2018	323/14457	0.266254	1.90745	6.64329	1.01719e-09	7.94111e-08	5.89789e-08	ITGA4/STK10/SELENOK/PAFAH1B1/RAC1/WDR1/AKT1/CRKL/DOCK8/RHOA/ADAM10/PIKFYVE/GOLPH3/PIK3R1/CAMK1D/SOS1/ROCK1/NCKAP1L/CKLF/HMGB1/ADAM17/MYH9/MYD88/LGALS3/BSG/SLC12A2/SLAMF1/DUSP1/PTGER4/LRCH1/F11R/BCR/SPN/ABL1/ITGAL/CD69/RIPK3/NF1/CD9/TGFB1/NEDD9/MSN/STK39/PTPRJ/CD99/PTK2B/MAPK1/PDE4B/ANXA1/ITGB1/CD81/KLRK1/PREX1/MYO1G/PIK3CG/PLCB1/CCR6/B4GALT1/CXCR4/LYST/TNFSF14/CHST2/FCER1G/CD200/ADAM8/ITGA1/KIT/C…	86
celltypes.CD4 T cell.down	celltypes	CD4 T cell	down	BP	GO:0043065	positive regulation of apoptotic process	118/2018	493/14457	0.239351	1.71472	6.50345	1.12314e-09	8.64817e-08	6.42303e-08	ITGA4/STK4/PARK7/RBM5/APC/FBXW7/STUB1/RNPS1/RIPK1/CTNNB1/RAD9A/APAF1/BAG1/MFN2/NFATC3/DNAJA1/GSK3B/PRELID1/DNM2/RBCK1/CTNNBL1/BTG1/CAMK1D/CASP3/MTCH2/HTRA2/PTPN1/UBE2M/DAPK3/HTT/VDAC1/NR3C1/SCRIB/HMGB1/PRNP/CAMK2D/TXNIP/NCOA1/SIRT2/IGF2R/PPP1CA/FOXO3/GRN/C3orf38/BARD1/SQSTM1/CASP4/CTSD/TSC22D1/BCL2/SRPK2/GADD45B/BCL6/ZC3H12A/CFLAR/UBB/ABL1/RIPK3/JAK2/NF1/PLEKHF1/TGFB1/RAPGEF2/NHERF1/CDK19/LGALS1/…	118
celltypes.CD4 T cell.down	celltypes	CD4 T cell	down	BP	GO:0007015	actin filament organization	104/2018	419/14457	0.24821	1.77818	6.5107	1.36537e-09	9.83939e-08	7.30775e-08	ARPC5/TPM3/CFL1/CORO1B/BLOC1S6/CAP1/DIAPH1/DLG1/DSTN/RAC1/SH3KBP1/WDR1/ARPC2/WASHC2C/DNM2/RHOA/ACTR2/ABI1/ARF1/CUL3/ARPC3/PIK3R1/SSH2/BRAF/ACTR3/ROCK1/WAS/NCKAP1L/FCHSD1/ARAP1/ADD1/GRB2/CYRIB/IQGAP2/ARPC4/WIPF1/VASP/TPM4/SMAD3/ARHGAP17/CAPZA1/TRIOBP/MAD2L2/ARF6/FCHSD2/PTGER4/BCL2/HIP1R/F11R/LCP1/ABL1/TAGLN2/ARHGAP25/JAK2/RDX/MYO5A/NEDD9/TESK1/ARPC5L/INPPL1/GPR65/LUZP1/SSH1/PRKCD/PTK2B/RHOBTB2/CLA…	104
celltypes.CD4 T cell.down	celltypes	CD4 T cell	down	BP	GO:0002228	natural killer cell mediated immunity	34/2018	84/14457	0.404762	2.89972	7.03313	1.90079e-09	1.28727e-07	9.56058e-08	KIF5B/HLA-F/LAMP1/HLA-A/AP1G1/SERPINB9/HLA-B/PIK3R1/GRB2/CD226/TUBB4B/HCST/TGFB1/RNF19B/SLAMF6/KLRK1/CALHM6/INPP5D/RAB27A/KLRB1/LYST/TIGIT/KLRC3/IL18RAP/KLRC2/NCR1/SLAMF7/KLRC1/KLRD1/NKG7/SH2D1B/GZMB/FCGR3A/LILRB1	34
celltypes.CD4 T cell.down	celltypes	CD4 T cell	down	BP	GO:0009615	response to virus	94/2018	371/14457	0.253369	1.81514	6.40647	2.79945e-09	1.82973e-07	1.35895e-07	JAK1/TRIM44/AUP1/CFL1/ATG12/RB1CC1/HNRNPUL1/SELENOK/MAVS/SEC11A/STAT2/PARP9/HSP90AA1/NT5C2/FMR1/NMI/ARF1/ZMYND11/TRIM56/VAMP8/LAMTOR5/NPC2/RIGI/HERC5/POU2F2/IRF2/UBE2W/ILRUN/ZMPSTE24/ISG20/TRAF6/MYD88/GBP3/SETD2/SMAD3/EIF2AK2/DDX60/TRIM38/NCBP3/EXOSC4/TRIM26/TANK/BCL2/RIOK3/DTX3L/ZC3H12A/SPN/IFNGR1/TRIM22/RIPK3/ODC1/HIF1A/JAK2/IFIH1/MICB/TGFB1/ITCH/IFI16/CASP1/IRF1/OAS1/TNFAIP3/SLFN11/CGAS/BST2/I…	94
celltypes.CD4 T cell.down	celltypes	CD4 T cell	down	BP	GO:0016197	endosomal transport	76/2018	279/14457	0.272401	1.95149	6.46384	3.2054e-09	2.04745e-07	1.52065e-07	USP7/VTI1B/HOOK3/AP3D1/VCP/CLTC/ITSN2/CHMP4B/CHMP4A/VPS4B/TMEM50A/VPS36/ATP6AP1/AP1G1/RAB14/CHMP1B/GRIPAP1/UBE2O/RAB8B/MAP2K1/WASHC2C/RAB6A/ARL1/PIKFYVE/RAB29/RAB35/STX8/SNX3/RUFY1/MAP2K2/WAS/DCTN1/RAB4B/SCRIB/SNX5/VPS26A/PLEKHA3/TSG101/STAM2/AP5B1/ZFYVE16/DYNC1LI1/BLOC1S1/RGP1/BLOC1S2/SNX30/EHD1/CHMP1A/RAB8A/EPS15L1/ARF6/SQSTM1/RAB11FIP4/CMTM6/RDX/MSN/DENND1B/BAIAP3/SNX18/PICALM/ARFIP1/SNX2/RAB9…	76
celltypes.CD4 T cell.down	celltypes	CD4 T cell	down	BP	GO:0001910	regulation of leukocyte mediated cytotoxicity	35/2018	90/14457	0.388889	2.78601	6.84564	3.90983e-09	2.44191e-07	1.81361e-07	HLA-F/LAMP1/HLA-A/AP1G1/SERPINB9/HLA-B/HLA-C/NCKAP1L/GRB2/CYRIB/CD226/MR1/RIPK3/TGFB1/TAP2/SLAMF6/KLRK1/INPP5D/STX7/KLRB1/TIGIT/STAP1/KLRC3/ITGAM/IL18RAP/KLRC2/NCR1/KLRC1/KLRD1/CX3CR1/TYROBP/HLA-DRA/HLA-DRB1/XCL1/LILRB1	35
celltypes.CD4 T cell.down	celltypes	CD4 T cell	down	BP	GO:0043254	regulation of protein-containing complex assembly	98/2018	398/14457	0.246231	1.76401	6.22519	6.39079e-09	3.82156e-07	2.83829e-07	ARPC5/PARK7/UBLCP1/PPP2CA/STUB1/SAR1A/VCP/MAVS/MECP2/EP300/CLIP1/DLG1/RAC1/H3-3A/RAP1B/HSP90AA1/ARPC2/WASHC2C/GSK3B/VPS33A/RHOA/H3-3B/ARPC3/AKAP9/NEK7/HSPA1A/CDK5RAP2/SSH2/TFIP11/NCKAP1L/DCTN1/FCHSD1/ADD1/HMGB1/GAK/GRB2/JMJD6/VPS41/CYRIB/SLF1/MYD88/ZNF827/ABHD17A/VASP/SIRT2/CAPZA1/LGALS3/EIF2AK2/TRIOBP/MED25/NAPB/SH3GLB1/VPS18/FARP2/ARF6/FCHSD2/PTGER4/WARS1/PIEZO1/RIOK3/HIP1R/LCP1/ABL1/TFRC/RDX/T…	98
celltypes.CD4 T cell.down	celltypes	CD4 T cell	down	BP	GO:0002274	myeloid leukocyte activation	61/2018	212/14457	0.287736	2.06135	6.27026	1.25831e-08	7.44522e-07	5.52959e-07	FAM76B/PDPK1/PJA2/NMI/ADAM10/VAMP8/STXBP2/RORA/KMT2E/RBPJ/HMGB1/DOCK2/JMJD6/TRAF6/CD226/MYD88/RELB/CD84/GRN/SLAMF1/SNAP23/BCR/ZC3H12A/IFNGR1/JAK2/TGFB1/IL4R/STK39/IFI35/PRKCD/CTSC/ANXA1/NOTCH2/TMEM106A/PLSCR1/PREX1/CALHM2/PIK3CG/SYT11/PRKCE/FCER1G/CD200/IRF4/KIT/STAP1/CCL5/CD74/ITGAM/CD300A/IL18RAP/PTGDR/LAT2/CX3CR1/CST7/PLCG2/TYROBP/FCGR3A/BTK/LYN/SYK/CNR2	61
celltypes.CD4 T cell.down	celltypes	CD4 T cell	down	BP	GO:0031341	regulation of cell killing	36/2018	98/14457	0.367347	2.63168	6.52797	1.39977e-08	8.11142e-07	6.02438e-07	HLA-F/LAMP1/HLA-A/AP1G1/SERPINB9/HLA-B/HLA-C/NCKAP1L/GRB2/CYRIB/CD226/MR1/RIPK3/TGFB1/TAP2/SLAMF6/KLRK1/INPP5D/STX7/KLRB1/TIGIT/STAP1/KLRC3/ITGAM/IL18RAP/PRF1/KLRC2/NCR1/KLRC1/KLRD1/CX3CR1/TYROBP/HLA-DRA/HLA-DRB1/XCL1/LILRB1	36
celltypes.CD4 T cell.down	celltypes	CD4 T cell	down	BP	GO:0051656	establishment of organelle localization	108/2018	459/14457	0.235294	1.68565	6.0127	1.5504e-08	8.89268e-07	6.60462e-07	ITGA4/HNRNPU/KIF5B/SUN2/APC/HOOK3/CFL1/CCDC186/BLOC1S6/XPO1/AP3D1/SAR1A/KPNB1/CSNK1D/LAMP1/MECP2/CHMP4B/PAFAH1B1/DLG1/CHMP4A/NUP88/VPS4B/TMED9/CTNNB1/TMED10/TRAPPC8/AP1G1/TTL/EXOC5/CHMP1B/PDPK1/DNM2/TRAPPC1/RAB6A/OPA1/DYNC1H1/CUL3/ABRAXAS2/MCPH1/AP3B1/VAMP8/STXBP2/KAT5/CDK5RAP2/BORCS6/KIF3B/HTT/DCTN1/SCRIB/FYCO1/FBXW11/MYH9/TSG101/SYNE2/EIF6/BLOC1S1/SIRT2/BLOC1S2/IRAG2/FAM91A1/KAT2B/CD84/CHMP1A/T…	108
celltypes.CD4 T cell.down	celltypes	CD4 T cell	down	BP	GO:0002501	peptide antigen assembly with MHC protein complex	13/2018	18/14457	0.722222	5.17402	7.13697	3.17807e-08	1.70133e-06	1.26358e-06	HLA-A/TAPBP/TAPBPL/HLA-DOA/HLA-DPB1/HLA-DMA/HLA-DMB/HLA-DPA1/HLA-DRA/HLA-DRB1/HLA-DQB1/HLA-DRB5/HLA-DQA1	13
celltypes.CD4 T cell.down	celltypes	CD4 T cell	down	BP	GO:0031348	negative regulation of defense response	64/2018	232/14457	0.275862	1.97628	6.03789	3.3008e-08	1.75036e-06	1.3e-06	ASH1L/ATG12/MAVS/NR1D2/HLA-F/HLA-A/STAT2/NT5C2/SERPINB9/FAM76B/PPARA/NMI/ARNT/ZFP36/HLA-B/RORA/ILRUN/OTULIN/GRB2/PARP1/SOCS5/SELENOS/SMAD3/NT5E/GRN/YWHAZ/TRIM38/PTGER4/BCR/SPN/MICB/TGFB1/ITCH/EXTL3/PRKCD/IFI16/RB1/GSTP1/LYAR/OAS1/TNFAIP3/FURIN/PARP14/IL10RA/ELF4/TNFRSF1B/INPP5D/SYT11/ACP5/RHBDF2/TIGIT/CD200/DUSP10/AOAH/DTX4/METRNL/ALOX5/KLRC1/KLRD1/CST7/HLA-DRB1/LYN/LILRB1/SYK	64
celltypes.CD4 T cell.down	celltypes	CD4 T cell	down	BP	GO:0010720	positive regulation of cell development	94/2018	389/14457	0.241645	1.73115	5.88787	3.47805e-08	1.82711e-06	1.357e-06	EIF4G2/BRD4/NRDC/AP3D1/IL2RG/MECP2/EP300/PAFAH1B1/PPP1CC/RIPK1/SMARCD2/CTNNB1/ZBTB1/DICER1/MAP2K1/FMR1/GOLGA4/QKI/RHOA/OPA1/SMARCE1/AP3B1/NUMB/KAT5/NPTN/EVI2B/ARID1B/BRAF/MAP2K2/SPEN/NCKAP1L/ADD1/HMGB1/BRD2/LIG4/PCID2/TRPV2/TRAF6/SOCS5/SIRT2/SLC30A1/FOXO3/ZNF335/MEGF8/BCL2/F11R/MACF1/BCL6/HIF1A/TGFB1/KLF10/IL4R/NEDD9/SASH3/ZFP36L1/SKIL/SMARCB1/RB1/RUFY3/EPHA4/BTN2A2/ANXA1/PLXNC1/PPP3CA/ZMIZ1/ITGB…	94
celltypes.CD4 T cell.down	celltypes	CD4 T cell	down	BP	GO:0002456	T cell mediated immunity	40/2018	119/14457	0.336134	2.40808	6.21222	4.07739e-08	2.08355e-06	1.54746e-06	HLA-F/HLA-A/ZBTB1/BTN3A2/HLA-B/HLA-C/WAS/NCKAP1L/BTN3A3/HMGB1/TRAF6/GZMM/CYRIB/MR1/SLAMF1/SPN/RIPK3/DUSP22/SASH3/TAP2/DENND1B/RFTN1/CTSC/CD81/TNFRSF1B/MYO1G/SMAD7/CD8A/RAB27A/STX7/IL18R1/CTSH/TBX21/PRF1/KLRC1/KLRD1/HLA-DRA/HLA-DRB1/XCL1/LILRB1	40
celltypes.CD4 T cell.down	celltypes	CD4 T cell	down	BP	GO:0060627	regulation of vesicle-mediated transport	109/2018	473/14457	0.230444	1.65091	5.79729	4.32116e-08	2.18822e-06	1.6252e-06	HNRNPK/PARK7/USP7/MIB1/PPP3R1/IL2RG/GNAI2/HLA-F/LAMP1/VPS4B/CSK/AP2M1/RAC1/RAP1B/DNAJC5/AP1G1/PDPK1/GRIPAP1/LMAN2/MAP2K1/FMR1/RABEP1/ARF1/VAMP8/STXBP2/NUMB/ARPC3/CAMK1D/CASP3/RAB29/BRAF/PTPN1/MDM2/SNX3/RUFY1/ROCK1/MAP2K2/NCKAP1L/RAB4B/SCRIB/HMGB1/NSF/DOCK2/TSG101/ZFYVE16/APPL1/DYNC1LI1/LGALS3/CD84/EHD1/DGKD/VPS18/SLAMF1/ARF6/HIP1R/CBLB/ANKRD13A/BCR/ABL1/AHI1/NEDD4L/RDX/TGFB1/IL4R/MSN/DTNBP1/CD151…	109
celltypes.CD4 T cell.down	celltypes	CD4 T cell	down	BP	GO:2000401	regulation of lymphocyte migration	26/2018	62/14457	0.419355	3.00427	6.36998	6.37504e-08	3.14334e-06	2.33457e-06	ITGA4/STK10/SELENOK/AKT1/CRKL/DOCK8/RHOA/ADAM10/ADAM17/LRCH1/SPN/ABL1/CD69/RIPK3/NEDD9/MSN/STK39/PTK2B/KLRK1/CCR6/TNFSF14/CD200/ADAM8/CCL5/CCL4/XCL1	26
celltypes.CD4 T cell.down	celltypes	CD4 T cell	down	BP	GO:0071216	cellular response to biotic stimulus	58/2018	210/14457	0.27619	1.97864	5.75388	1.37484e-07	6.13332e-06	4.55524e-06	PABPN1/PAF1/APAF1/AKT1/TMCO1/GSK3B/RHOA/ZFP36/HDAC5/HMGB1/ZMPSTE24/TXNIP/TRAF6/CYRIB/MYD88/GBP3/SELENOS/NFKBIB/IRAK1/TNIP1/LITAF/CARD16/BCR/ZC3H12A/ABL1/JAK2/EIF2AK3/CDK19/MAP2K3/CASP1/CASP7/GSTP1/CAPN2/MAPK1/PDE4B/GFI1/TNFAIP3/RIPK2/NOTCH2/KLRK1/GBP5/TNFRSF1B/IRAK2/PRKCE/PTPN22/STAP1/CD40/CCR5/CX3CR1/PLCG2/IRF8/BTK/MEF2C/LYN/LILRB1/SYK/LY86/TLR10	58
celltypes.CD4 T cell.down	celltypes	CD4 T cell	down	BP	GO:0007034	vacuolar transport	48/2018	162/14457	0.296296	2.12267	5.78777	1.66082e-07	7.35076e-06	5.45944e-06	VTI1B/HOOK3/AP3D1/VCP/LAMP1/CHMP4B/VPS13C/CHMP4A/LAPTM5/VPS4B/M6PR/TMEM50A/VPS36/AP1G1/CHMP1B/MON1B/LIPA/VPS33A/AP3B1/HSPA1A/GAK/TSG101/VPS41/STAM2/ZFYVE16/IGF2R/CHMP1A/GRN/VPS18/SQSTM1/DTX3L/PSAP/HGSNAT/GNPTAB/PLEKHM1/PLEKHF1/ATP6V0D1/SLC30A4/PLEKHF2/VPS37B/UEVLD/TRAK1/LYST/NPC1/RHOB/EHD3/DENND3/ADRB2	48
celltypes.CD4 T cell.down	celltypes	CD4 T cell	down	BP	GO:0072659	protein localization to plasma membrane	70/2018	273/14457	0.25641	1.83693	5.62293	1.8019e-07	7.85153e-06	5.83136e-06	KIF5B/VTI1B/TMEM59/EFR3A/OPTN/CLTC/CIB1/DLG1/CSK/AP2M1/ATP6AP1/EXOC5/PDPK1/GRIPAP1/AKT1/GOLGA4/VAMP8/FRMD8/NUMB/GOLPH3/PIK3R1/TTC7A/STX8/ROCK1/SCRIB/GAK/NSF/PRNP/CAMK2D/ATP1B3/APPL1/SCP2/LGALS3/EHD1/BSG/RAB8A/ZDHHC7/ARF6/PPP2R5A/SQSTM1/F11R/MACF1/RAP2A/RDX/AFDN/PLEKHF1/TGFB1/MYO5A/HYCC1/RAPGEF2/NHERF1/ATP2B4/PICALM/PPP1R9B/PTCH1/ITGB1/FLNA/CD81/EZR/RHOQ/STX7/FCHO2/GGA2/RHBDF2/PRKCE/TSPAN33/EHD3/A…	70
celltypes.CD4 T cell.down	celltypes	CD4 T cell	down	BP	GO:0032606	type I interferon production	39/2018	121/14457	0.322314	2.30907	5.82414	2.12671e-07	9.12537e-06	6.77744e-06	XIAP/ATG12/MAVS/GAPDH/ZBTB20/HSP90AA1/QKI/NMI/TRIM56/CUL3/RIGI/ILRUN/TRAF6/MYD88/RELB/SETD2/IRAK1/TRIM38/TANK/RIOK3/KPNA2/IFIH1/ITCH/IRF1/OAS1/XAF1/RIPK2/CGAS/TBK1/PTPN22/REL/RNF135/DTX4/IRF5/PLCG2/TYROBP/IRF8/LILRB1/SYK	39
celltypes.CD4 T cell.down	celltypes	CD4 T cell	down	BP	GO:0001776	leukocyte homeostasis	35/2018	104/14457	0.336538	2.41097	5.81641	2.72961e-07	1.15362e-05	8.56798e-06	PPP2CA/RC3H2/RC3H1/AKT1/LIPA/CASP3/SOS1/NCKAP1L/HMGB1/ADAM17/SOS2/BCL2/ABL1/RIPK3/HIF1A/NF1/TGFB1/SASH3/SH2B3/SKIL/BCL2L11/TCIRG1/PDE4B/ANXA1/TNFAIP3/TNFSF14/PMAIP1/SLC15A4/CD74/F2R/GAPT/BTK/MEF2C/LYN/TNFRSF13B	35
celltypes.CD4 T cell.down	celltypes	CD4 T cell	down	BP	GO:0070201	regulation of establishment of protein localization	106/2018	478/14457	0.221757	1.58867	5.27161	5.00477e-07	1.98133e-05	1.47154e-05	PRP4K/TMEM30A/PARK7/USP7/OS9/FBXW7/HUWE1/XPO1/SELENOK/NPEPPS/MAVS/KIF20B/ARIH2/UCP2/EP300/CIB1/EMD/CSK/UBE2L3/TMED10/ENSA/HSP90AA1/RBM22/FAM76B/GRIPAP1/DNAJA1/GSK3B/NSD2/GOLPH3/PIK3R1/RAB29/UHMK1/HTRA2/PTPN1/MDM2/SNX3/EDEM2/WWP2/PPM1A/PFKL/PRNP/CPAP/TSG101/SIRT7/OAZ1/SMAD3/OAZ2/BSG/BARD1/SLC12A2/RAB8A/SH3GLB1/ARF6/ACSL4/CTSD/SP100/RAB11FIP5/LCP1/ZC3H12A/TCAF1/ABAT/PFKFB2/HIF1A/JAK2/UBE2J1/NF1/TGF…	106
celltypes.CD4 T cell.down	celltypes	CD4 T cell	down	BP	GO:0031623	receptor internalization	39/2018	125/14457	0.312	2.23518	5.58627	5.4831e-07	2.09663e-05	1.55718e-05	PPP3R1/CLTC/GRK2/AP2M1/AP2B1/FMR1/RABEP1/DNM2/ARF1/NUMB/MDM2/SCRIB/GRB2/LMBRD1/CBLB/ANKRD13A/AHI1/NEDD4L/TFRC/CD9/DTNBP1/ITCH/RALB/PICALM/EPS15/TBC1D5/ITGB1/ANXA2/CD81/SYNE1/EZR/GRK3/HIP1/FCER1G/CD63/PLCG2/RAB31/LILRB1/SYK	39
celltypes.CD4 T cell.down	celltypes	CD4 T cell	down	BP	GO:1990868	response to chemokine	25/2018	64/14457	0.390625	2.79845	5.8077	5.82137e-07	2.15276e-05	1.59886e-05	CIB1/DOCK8/RHOA/WBP1L/SLC12A2/DUSP1/LRCH1/ZC3H12A/HIF1A/JAK2/STK39/SH2B3/PTK2B/RIPOR1/CCR6/CXCR4/CXCR3/CXCR5/CXCR6/CCL5/CCR5/CX3CR1/CCL4/XCL1/LYN	25
celltypes.CD4 T cell.down	celltypes	CD4 T cell	down	BP	GO:1990869	cellular response to chemokine	25/2018	64/14457	0.390625	2.79845	5.8077	5.82137e-07	2.15276e-05	1.59886e-05	CIB1/DOCK8/RHOA/WBP1L/SLC12A2/DUSP1/LRCH1/ZC3H12A/HIF1A/JAK2/STK39/SH2B3/PTK2B/RIPOR1/CCR6/CXCR4/CXCR3/CXCR5/CXCR6/CCL5/CCR5/CX3CR1/CCL4/XCL1/LYN	25
celltypes.CD4 T cell.down	celltypes	CD4 T cell	down	BP	GO:0051607	defense response to virus	70/2018	282/14457	0.248227	1.7783	5.31623	6.72845e-07	2.44004e-05	1.81223e-05	TRIM44/ATG12/RB1CC1/SELENOK/MAVS/STAT2/PARP9/HSP90AA1/NT5C2/ZMYND11/TRIM56/VAMP8/RIGI/HERC5/IRF2/UBE2W/ILRUN/ZMPSTE24/ISG20/TRAF6/MYD88/GBP3/SETD2/EIF2AK2/DDX60/TRIM38/NCBP3/EXOSC4/TRIM26/TANK/BCL2/RIOK3/DTX3L/ZC3H12A/SPN/IFNGR1/TRIM22/RIPK3/IFIH1/MICB/ITCH/IFI16/CASP1/IRF1/OAS1/TNFAIP3/SLFN11/CGAS/BST2/IFIT3/PLSCR1/GBP5/IFIT2/LYST/PMAIP1/TBK1/APOBEC3D/TBKBP1/APOBEC3F/SLFN13/APOBEC3C/ZBP1/RNF135/…	70
celltypes.CD4 T cell.down	celltypes	CD4 T cell	down	BP	GO:0051336	regulation of hydrolase activity	69/2018	278/14457	0.248201	1.77812	5.27641	8.10108e-07	2.86391e-05	2.12704e-05	RALBP1/TMBIM6/PSMB8/NRDC/VCP/GAPDH/EGLN1/SERPINB1/SERPINB9/PDPK1/AKT1/SERPINB6/GSK3B/RAB3GAP2/PRELID1/DOCK8/RALGAPA1/RHOA/HSPA1A/ROCK1/MTMR9/SRGAP2/ARAP1/SCRIB/HMGB1/GNB5/MAPRE2/RGP1/GRN/LRCH1/TANK/PSAP/BCR/DVL3/TAX1BP3/RDX/NF1/CHP1/RAPGEF2/ABR/MBP/GPR65/PRKCD/SNX18/EPHA4/OAS1/RAPGEF1/ITGB1/FURIN/RIPOR1/KLRK1/SERPINI1/CORO1C/USP6NL/SIPA1L1/EVI5/CD200/RGS2/RHOC/CTSH/CCL5/VAV3/F2R/GZMA/CST7/FGD2/PL…	69
celltypes.CD4 T cell.down	celltypes	CD4 T cell	down	BP	GO:0000209	protein polyubiquitination	64/2018	252/14457	0.253968	1.81943	5.2855	8.59645e-07	3.00128e-05	2.22906e-05	GABARAP/TRIM44/WSB1/HUWE1/XIAP/UBE2H/STUB1/TNKS2/UBE2R2/TCF25/NPEPPS/ARIH2/RC3H2/MKRN1/UBR4/RC3H1/UBE2L3/CTNNB1/NT5C2/UBE2O/CDC27/RBCK1/ZFP91/NMI/TRIM56/CUL3/UBE2L6/RNF6/RNF213/NBN/MDM2/WWP2/RNF115/FBXO7/UBE2W/FBXW11/RNF167/TRAF6/RNF166/RNF146/RNF41/UBR2/MARCHF8/BARD1/SYVN1/TRIM38/UBE2E3/WSB2/TRIM26/BCL2/DTX3L/TRIM22/NEDD4L/AMFR/UBE2J1/UBE2A/AXIN1/ITCH/TNFAIP3/RIPK2/PTPN22/RNF135/DTX4/MARCHF1	64
celltypes.CD4 T cell.down	celltypes	CD4 T cell	down	BP	GO:0006898	receptor-mediated endocytosis	61/2018	237/14457	0.257384	1.8439	5.27606	9.52354e-07	3.28416e-05	2.43916e-05	ITGA4/HNRNPK/RALBP1/CAP1/PPP3R1/CLTC/ITSN2/GRK2/AP2M1/M6PR/AP2B1/RAC1/FMR1/RABEP1/DNM2/ARF1/PIKFYVE/NUMB/MDM2/SCRIB/GAK/GRB2/LMBRD1/IGF2R/DGKD/ARF6/FCHSD2/HIP1R/CBLB/ANKRD13A/AHI1/NEDD4L/TFRC/CD9/DTNBP1/ITCH/BMP2K/CCDC32/BICD1/RALB/PICALM/EPS15/TBC1D5/ITGB1/ANXA2/CD81/SYNE1/EZR/ABCA2/GRK3/FCHO2/HIP1/FCER1G/CD63/ADRB2/ITGAM/GAS7/PLCG2/RAB31/LILRB1/SYK	61
celltypes.CD4 T cell.down	celltypes	CD4 T cell	down	BP	GO:0051223	regulation of protein transport	88/2018	383/14457	0.229765	1.64604	5.16111	9.89646e-07	3.37139e-05	2.50395e-05	PRP4K/TMEM30A/PARK7/OS9/XPO1/SELENOK/MAVS/KIF20B/UCP2/EP300/EMD/CSK/TMED10/ENSA/HSP90AA1/RBM22/FAM76B/GRIPAP1/DNAJA1/GSK3B/GOLPH3/PIK3R1/RAB29/UHMK1/PTPN1/MDM2/SNX3/EDEM2/WWP2/PPM1A/PFKL/TSG101/SIRT7/OAZ1/SMAD3/OAZ2/BSG/BARD1/SLC12A2/RAB8A/ARF6/ACSL4/SP100/RAB11FIP5/LCP1/ZC3H12A/ABAT/PFKFB2/HIF1A/JAK2/UBE2J1/NF1/TGFB1/NEO1/CHP1/CPT1A/PRKCD/BAIAP3/MIDN/SIDT2/RUFY3/ITPR1/PRKCB/ARFIP1/NADK/PRKAR1A/T…	88
celltypes.CD4 T cell.down	celltypes	CD4 T cell	down	BP	GO:0002237	response to molecule of bacterial origin	72/2018	296/14457	0.243243	1.7426	5.19931	1.06056e-06	3.58804e-05	2.66485e-05	HNRNPA0/XIAP/PABPN1/PAF1/NFKB2/AKT1/RHOA/ZFP36/CASP3/HDAC5/HMGB1/ADAM17/WDR83/TRAF6/CYRIB/MYD88/GBP3/SELENOS/NFKBIB/IRAK1/TNIP1/PTGER4/LITAF/CARD16/BCR/ZC3H12A/ABL1/JAK2/AKIRIN2/MAPKAPK2/TAP2/CDK19/MAP2K3/CASP1/CASP7/GSTP1/CAPN2/MAPK1/PDE4B/GFI1/TNFAIP3/RIPK2/IL10RA/KLRK1/GBP5/TNFRSF1B/IRAK2/ACP5/FOS/PRKCE/PTPN22/DUSP10/PTGER2/STAP1/FOSL2/NR4A1/IRF5/F2R/CD40/CCR5/FASLG/CX3CR1/PLCG2/IRF8/BTK/MEF2C…	72
celltypes.CD4 T cell.down	celltypes	CD4 T cell	down	BP	GO:0051345	positive regulation of hydrolase activity	46/2018	162/14457	0.283951	2.03423	5.3318	1.13702e-06	3.73754e-05	2.77588e-05	RALBP1/VCP/PDPK1/AKT1/GSK3B/PRELID1/DOCK8/RALGAPA1/RHOA/HSPA1A/ROCK1/MTMR9/SRGAP2/ARAP1/SCRIB/GNB5/MAPRE2/RGP1/GRN/TANK/PSAP/BCR/DVL3/TAX1BP3/NF1/RAPGEF2/ABR/MBP/GPR65/PRKCD/SNX18/EPHA4/RAPGEF1/ITGB1/CORO1C/USP6NL/SIPA1L1/EVI5/CD200/RHOC/CTSH/CCL5/F2R/PLEK/MEF2C/LYN	46
celltypes.CD4 T cell.down	celltypes	CD4 T cell	down	BP	GO:0070482	response to oxygen levels	73/2018	302/14457	0.241722	1.7317	5.17576	1.1508e-06	3.75057e-05	2.78556e-05	MT-CYB/MT-ND4/MT-ND2/MT-CO2/MT-ATP6/P4HB/TMBIM6/BNIP2/MT-ND1/NPEPPS/ALKBH5/MT-ND5/EGLN1/MECP2/UCP2/EP300/ATP6AP1/CREBBP/MT-CO1/APAF1/AKT1/PPARA/ARNT/VHL/ITPR2/RORA/CASP3/VMA22/PTPN1/MDM2/ACAA2/CAT/ADAM17/WDR83/ADO/SMAD3/SIRT2/CPEB4/IRAK1/FOXO3/BCL2/CFLAR/ABAT/TFRC/HIF1A/NF1/TGFB1/CYB5R4/ZFP36L1/CPT1A/ATP6V0D1/PTK2B/ITPR1/EPHA4/LIMD1/CAPN2/ATP6V1A/CDKN1A/NR4A2/CD38/LMNA/CXCR4/SLC2A1/FOS/PMAIP1/PRK…	73
celltypes.CD4 T cell.down	celltypes	CD4 T cell	down	BP	GO:0032386	regulation of intracellular transport	64/2018	254/14457	0.251969	1.80511	5.21402	1.15433e-06	3.75057e-05	2.78556e-05	PRP4K/TMEM30A/PARK7/USP7/NEAT1/OS9/XPO1/MAVS/KIF20B/ALKBH5/LAMP1/MECP2/EP300/PPP1CC/EMD/HSP90AA1/RBM22/FAM76B/GRIPAP1/MAP2K1/GSK3B/DYNC1H1/PIK3R1/RAB29/UHMK1/PTPN1/MDM2/SNX3/MAP2K2/EDEM2/PPM1A/SIRT7/OAZ1/SCP2/SETD2/SMAD3/PPP1R12A/OAZ2/EHD1/BARD1/SP100/LCP1/ZC3H12A/JAK2/UBE2J1/RDX/NF1/TGFB1/MSN/CHP1/PRKCD/RUFY3/REEP5/ARFIP1/MAPK1/ANXA2/FLNA/CD81/RIPOR1/EZR/ABCA2/PKIG/PRR5L/AKAP5	64
celltypes.CD4 T cell.down	celltypes	CD4 T cell	down	BP	GO:0051338	regulation of transferase activity	94/2018	419/14457	0.224344	1.6072	5.0802	1.3024e-06	4.16814e-05	3.09569e-05	HNRNPU/CALM2/APC/PPP2CA/FBXW7/TAOK3/TAF7/PABPN1/UBE2I/CDK12/CIB1/RAP2B/UBE2L3/PDPK1/SYAP1/BMI1/AKT1/MAP2K1/DNAJA1/GSK3B/RHOA/ABI1/ZFP91/ZFP36/HIPK3/DBI/NBN/PTPN1/PILRB/MAP2K2/HERC5/TAOK2/ADAM17/SOCS4/TSG101/TRAF6/SOCS5/TINF2/ARRDC3/CDKN2D/KAT2B/DIPK2A/DUSP1/MAD2L2/WARS1/DTX3L/KSR1/BLM/ABL1/RAP2C/RFC2/RIPK3/UVRAG/ERN1/JAK2/NEDD9/PLAAT4/TESK1/AXIN1/CHP1/RAPGEF2/NHERF1/PTPRJ/RASSF2/MAP2K3/PRKCD/LMO4…	94
celltypes.CD4 T cell.down	celltypes	CD4 T cell	down	BP	GO:0002440	production of molecular mediator of immune response	55/2018	208/14457	0.264423	1.89433	5.23276	1.30509e-06	4.16814e-05	3.09569e-05	TMBIM6/IL2RG/MAVS/HLA-F/LAPTM5/HLA-A/STAT6/NSD2/CTNNBL1/NBN/RIGI/LIG4/TRAF6/CD226/MYD88/TCF3/SLAMF1/MAD2L2/LITAF/BCL6/SANBR/TFRC/UBE2J1/PCYT1A/TGFB1/IL4R/SASH3/MAPKAPK2/DENND1B/RIPK2/CGAS/BST2/CD81/TNFRSF1B/CALHM6/LACC1/SMAD7/CCR6/ACP5/IL18R1/SLC15A4/KIT/FCRL3/SWAP70/CD74/IRF5/CD40/TBX21/CD22/PLCG2/BTK/XCL1/LILRB1/SYK/CD244	55
celltypes.CD4 T cell.down	celltypes	CD4 T cell	down	BP	GO:0034504	protein localization to nucleus	73/2018	303/14457	0.240924	1.72599	5.14401	1.3131e-06	4.17001e-05	3.09708e-05	STK4/HNRNPU/JAK1/CTDNEP1/PARK7/SUN2/XPO1/PPP3R1/MAVS/KPNB1/MARK3/ELAVL1/EP300/TOR1AIP2/KPNA1/NUP88/KPNA4/PAF1/CREBBP/PARP9/HSP90AA1/RBM22/FAM76B/AKT1/NFATC3/LARP7/GSK3B/PIKFYVE/PIK3R1/LAMTOR5/MDM2/ILRUN/PARP1/EIF4ENIF1/TXNIP/DNAJB6/ZBTB7A/APPL1/SMAD3/BARD1/YWHAZ/SQSTM1/SP100/OTUD7B/DTX3L/CBLB/SPG11/ZC3H12A/KPNA2/TFRC/JAK2/NF1/TGFB1/AKIRIN2/TESK1/EIF2AK3/CHP1/PRKCD/SESN2/PPP3CA/FLNA/CDKN1A/SYNE1/B…	73
celltypes.CD4 T cell.down	celltypes	CD4 T cell	down	BP	GO:1903076	regulation of protein localization to plasma membrane	34/2018	106/14457	0.320755	2.29789	5.40186	1.42019e-06	4.48476e-05	3.33085e-05	KIF5B/VTI1B/TMEM59/CLTC/CIB1/DLG1/CSK/AP2M1/PDPK1/GRIPAP1/AKT1/VAMP8/NUMB/PIK3R1/STX8/PRNP/CAMK2D/APPL1/LGALS3/ZDHHC7/ARF6/PPP2R5A/SQSTM1/TGFB1/ATP2B4/PICALM/PPP1R9B/ITGB1/EZR/RHOQ/STX7/PRKCE/ABI3/AKAP5	34
celltypes.CD4 T cell.down	celltypes	CD4 T cell	down	BP	GO:0050868	negative regulation of T cell activation	36/2018	117/14457	0.307692	2.20432	5.26806	2.13109e-06	6.35468e-05	4.71965e-05	RC3H2/DLG1/LAPTM5/RC3H1/CASP3/SCRIB/HMGB1/PRNP/SOCS5/LGALS3/CBLB/BCL6/ZC3H12A/SPN/CD69/DUSP22/TGFB1/IL4R/ITCH/LGALS1/LAX1/BTN2A2/IRF1/PRKAR1A/ANXA1/SMAD7/RUNX3/PAWR/TIGIT/PTPN22/CD74/CD300A/TBX21/HLA-DRB1/XCL1/LILRB1	36
celltypes.CD4 T cell.down	celltypes	CD4 T cell	down	BP	GO:1990858	cellular response to lectin	12/2018	20/14457	0.6	4.29841	5.9453	2.244e-06	6.5355e-05	4.85394e-05	EP300/CREBBP/TRAF6/KLRK1/KLRC3/KLRC2/KLRC1/KLRD1/PLCG2/TYROBP/LYN/SYK	12
celltypes.CD4 T cell.down	celltypes	CD4 T cell	down	BP	GO:0006909	phagocytosis	54/2018	208/14457	0.259615	1.85989	5.03124	2.9704e-06	8.43264e-05	6.26295e-05	IL2RG/CSK/TUSC2/RAB14/LMAN2/DNM2/CLCN3/PIKFYVE/CAMK1D/SNX3/NCKAP1L/HMGB1/MYH9/DOCK2/JMJD6/MYD88/APPL1/SLAMF1/SPG11/BCR/ABL1/ITGAL/ARHGAP25/TGFB1/PTPRJ/PRKCD/LYAR/ANXA1/ITGB1/CYBA/PLSCR1/RUBCN/MYO1G/LIMK1/CORO1C/SYT11/RAB27A/LYST/PRKCE/FCER1G/STAP1/GSN/NCF4/IL2RB/VAV3/ITGAM/CD300A/PLCG2/TYROBP/IRF8/BTK/RAB31/LYN/SYK	54
celltypes.CD4 T cell.down	celltypes	CD4 T cell	down	BP	GO:0072593	reactive oxygen species metabolic process	53/2018	205/14457	0.258537	1.85216	4.94941	4.1745e-06	0.000116163	8.62744e-05	MT-ND2/PARK7/GNAI2/UCP2/ELAVL1/RIPK1/RAC1/TUSC2/LIPA/PPARA/RHOA/CLCN3/PIKFYVE/CAT/VDAC1/GRB2/EIF6/PRDX5/SIRT2/RNF41/FOXO3/PRCP/BCL2/BCR/ZC3H12A/CFLAR/RIPK3/HIF1A/TGFB1/CYB5R4/PRKCD/PTK2B/G6PD/GSTP1/SESN2/CYBA/CDKN1A/PREX1/RAB27A/ACP5/PMAIP1/PRKCE/HVCN1/NCF4/HBA1/HBB/HBA2/ITGAM/ALOX5/PLCG2/TYROBP/CYBB/SYK	53
celltypes.CD4 T cell.down	celltypes	CD4 T cell	down	BP	GO:0032102	negative regulation of response to external stimulus	79/2018	346/14457	0.228324	1.63572	4.82075	4.5127e-06	0.000124343	9.23497e-05	ASH1L/ATG12/CORO1B/MAVS/NR1D2/HLA-F/HLA-A/STAT2/NT5C2/SERPINB9/FAM76B/TMX1/PPARA/NMI/ARNT/ZFP36/HLA-B/RORA/ILRUN/OTULIN/GRB2/PARP1/SOCS5/SELENOS/SMAD3/NT5E/GRN/SLC12A2/YWHAZ/DUSP1/TRIM38/PTGER4/CARD16/ST6GAL1/BCR/SPN/CD9/MICB/TGFB1/NEO1/ITCH/EXTL3/SH2B3/PRKCD/IFI16/RB1/CLASP1/EPHA4/GSTP1/LYAR/OAS1/TNFAIP3/FURIN/ANXA2/PARP14/IL10RA/ELF4/KLRK1/TNFRSF1B/INPP5D/SYT11/ACP5/RHBDF2/TIGIT/CD200/DUSP10/AO…	79
celltypes.CD4 T cell.down	celltypes	CD4 T cell	down	BP	GO:2000377	regulation of reactive oxygen species metabolic process	39/2018	135/14457	0.288889	2.06961	5.02899	4.59872e-06	0.000124542	9.24976e-05	PARK7/GNAI2/ELAVL1/RIPK1/RAC1/TUSC2/PPARA/RHOA/CLCN3/PIKFYVE/VDAC1/GRB2/EIF6/SIRT2/RNF41/FOXO3/PRCP/BCL2/BCR/ZC3H12A/CFLAR/RIPK3/HIF1A/TGFB1/PRKCD/PTK2B/G6PD/GSTP1/CYBA/CDKN1A/RAB27A/ACP5/PRKCE/HVCN1/ITGAM/ALOX5/PLCG2/TYROBP/SYK	39
celltypes.CD4 T cell.down	celltypes	CD4 T cell	down	BP	GO:0044092	negative regulation of molecular function	102/2018	477/14457	0.213836	1.53193	4.7583	4.62405e-06	0.000124542	9.24976e-05	ITGA4/HNRNPU/CALM2/UBLCP1/USP7/TAX1BP1/APC/TMBIM6/TAF7/GNAI3/GNAI2/GAPDH/EGLN1/GOLGA2/SERPINB1/SYMPK/PSME3IP1/PARP9/SERPINB9/PDPK1/AKT1/FMR1/SERPINB6/DNAJA1/GSK3B/PPARA/RBCK1/ZFP36/HIPK3/PTPN1/ROCK1/WWP2/ILRUN/OTULIN/PRNP/SOCS4/TSG101/CAMK2D/DNAJB2/GNB5/SOCS5/PRDX5/TINF2/PPP1R12A/IRAK1/DUSP1/MAD2L2/LRCH1/SP100/WARS1/DTX3L/CARD16/ZC3H12A/ABL1/NEDD4L/RDX/TESK1/ITCH/CHP1/STK39/PTPRJ/ID3/IFI16/RALB/M…	102
celltypes.CD4 T cell.down	celltypes	CD4 T cell	down	BP	GO:0001701	in utero embryonic development	82/2018	363/14457	0.225895	1.61832	4.80553	4.63071e-06	0.000124542	9.24976e-05	STK4/MT-ND4/RBBP6/TBL1XR1/MBNL1/CIR1/MIB1/NASP/RTF1/EGLN1/MGAT1/PPP1CC/CTNNB1/RIC8A/BMI1/MFN2/AKT1/MAP2K1/ARNT/ADAM10/CUL3/SEC24C/NBN/CERT1/BIRC6/RBPJ/MYH9/GRB2/LIG4/DNAJB6/TRAF6/NCOA1/SETD2/SMAD3/WDTC1/SLC30A1/HS6ST1/ZNF335/KEAP1/BPTF/OTUD7B/GNA13/BCOR/RUNDC1/HIF1A/PTPN18/AXIN1/SLC25A20/ZFP36L1/SKIL/BMPR1A/HEG1/SMARCB1/BCL2L11/RDH10/ELL/MAFF/CAPN2/MAPK1/PTCH1/ZMIZ1/ITGB1/FURIN/VASH1/CHST11/NOTCH…	82
celltypes.CD4 T cell.down	celltypes	CD4 T cell	down	BP	GO:0110053	regulation of actin filament organization	60/2018	243/14457	0.246914	1.76889	4.8686	4.95162e-06	0.000132538	9.84367e-05	ARPC5/CORO1B/DLG1/DSTN/RAC1/WDR1/ARPC2/WASHC2C/RHOA/ARF1/ARPC3/PIK3R1/SSH2/BRAF/ROCK1/WAS/NCKAP1L/FCHSD1/ARAP1/ADD1/GRB2/CYRIB/VASP/SMAD3/CAPZA1/TRIOBP/ARF6/FCHSD2/PTGER4/HIP1R/F11R/ABL1/RDX/TESK1/ARPC5L/INPPL1/GPR65/SSH1/PRKCD/PTK2B/CLASP1/MTPN/GBA2/ARFIP1/ARHGAP35/CDC42EP3/FLNA/TGFBR1/PREX1/CAPG/LIMK1/ARHGAP18/MTSS1/PRKCE/RHOC/PHLDB2/GSN/SWAP70/CYRIA/PLEK	60
celltypes.CD4 T cell.down	celltypes	CD4 T cell	down	BP	GO:0002709	regulation of T cell mediated immunity	30/2018	93/14457	0.322581	2.31098	5.10846	5.10301e-06	0.000135943	0.000100966	HLA-F/HLA-A/ZBTB1/HLA-B/HLA-C/WAS/NCKAP1L/HMGB1/TRAF6/CYRIB/MR1/SLAMF1/SPN/RIPK3/DUSP22/SASH3/TAP2/DENND1B/CD81/TNFRSF1B/SMAD7/STX7/IL18R1/TBX21/KLRC1/KLRD1/HLA-DRA/HLA-DRB1/XCL1/LILRB1	30
celltypes.CD4 T cell.down	celltypes	CD4 T cell	down	BP	GO:0050792	regulation of viral process	38/2018	131/14457	0.290076	2.07811	4.99263	5.4506e-06	0.000141842	0.000105346	P4HB/ATG12/MAVS/HEXIM1/FMR1/LARP7/ZFP36/FAM111A/HMGB1/TSG101/ISG20/EIF2AK2/TNIP1/BSG/TRIM38/SP100/BCL2/SRPK2/KPNA2/IFIH1/LGALS1/IFI16/OAS1/FURIN/VPS37B/BST2/PLSCR1/CXCR4/STOM/APOBEC3D/APOBEC3F/APOBEC3C/OASL/CCL5/APOBEC3G/CD74/APOBEC3H/HLA-DRB1	38
celltypes.CD4 T cell.down	celltypes	CD4 T cell	down	BP	GO:0040013	negative regulation of locomotion	70/2018	298/14457	0.234899	1.68282	4.79725	5.57279e-06	0.000143236	0.000106382	CORO1B/MECP2/RAC1/SERPINB1/ADIPOR1/RAP2B/AKT1/GSK3B/RHOA/RBBP7/BRAF/PTPN1/HDAC5/WAS/SRGAP2/HMGB1/ARRDC3/SUDS3/RNF41/FOXO3/DUSP1/PTGER4/LRCH1/SP100/GNA13/BCL2/ST6GAL1/BCR/TCAF1/RAP2C/CD69/RAP2A/DUSP22/NF1/AFDN/TGFB1/NEDD9/NHERF1/ABHD6/ABHD2/PTPRJ/BMPR1A/VCL/SAP30/CLASP1/ATP2B4/EPHA4/TP53INP1/VASH1/BST2/TGFBR1/KLRK1/GNA12/CORO1C/SMAD7/PLCB1/CTNNA1/RHOB/CD200/DUSP10/PHLDB2/CLIC4/TGFBR3/STAP1/CD74/CD…	70
celltypes.CD4 T cell.down	celltypes	CD4 T cell	down	BP	GO:0002700	regulation of production of molecular mediator of immune response	47/2018	176/14457	0.267045	1.91312	4.90904	5.63158e-06	0.000143236	0.000106382	TMBIM6/IL2RG/MAVS/HLA-F/LAPTM5/HLA-A/STAT6/NSD2/RIGI/TRAF6/CD226/MYD88/SLAMF1/MAD2L2/LITAF/BCL6/TFRC/UBE2J1/TGFB1/IL4R/SASH3/MAPKAPK2/DENND1B/RIPK2/CGAS/BST2/CD81/TNFRSF1B/CALHM6/LACC1/SMAD7/ACP5/IL18R1/SLC15A4/KIT/FCRL3/CD74/IRF5/CD40/TBX21/CD22/PLCG2/BTK/XCL1/LILRB1/SYK/CD244	47
celltypes.CD4 T cell.down	celltypes	CD4 T cell	down	BP	GO:0051924	regulation of calcium ion transport	52/2018	202/14457	0.257426	1.8442	4.86667	5.85982e-06	0.000147473	0.000109529	CALM2/TMBIM6/PPP3R1/GNAI2/DIAPH1/UCP2/CTNNB1/PDPK1/PDE4D/FMR1/TMX1/HTT/VDAC1/PRNP/TRPV2/CAMK2D/GNB5/STIM2/LGALS3/CD84/SLC30A1/BCL2/SPG11/ABL1/TGFB1/PTK2B/TMEM38A/ATP2B1/G6PD/PDE4B/PPP3CA/CYBA/PIK3CG/SESTD1/CXCR4/AHNAK/PRKCE/P2RX5/RGS9/CXCR3/FCRL3/CCL5/F2R/CD19/AKAP5/CCL4/TSPAN13/MS4A1/XCL1/LYN/DMD/LILRB1	52
celltypes.CD4 T cell.down	celltypes	CD4 T cell	down	BP	GO:0032801	receptor catabolic process	14/2018	28/14457	0.5	3.58201	5.50822	5.95357e-06	0.000148733	0.000110465	LAPTM5/PTPN1/SH3GLB1/DTX3L/NEDD4L/UVRAG/TGFB1/CAPN1/ITCH/FURIN/ANXA2/SNX25/ABCA2/MYLIP	14
celltypes.CD4 T cell.down	celltypes	CD4 T cell	down	BP	GO:0002367	cytokine production involved in immune response	34/2018	113/14457	0.300885	2.15555	4.96688	6.9961e-06	0.000171725	0.000127541	MAVS/HLA-F/LAPTM5/HLA-A/RIGI/TRAF6/CD226/MYD88/SLAMF1/LITAF/BCL6/UBE2J1/TGFB1/SASH3/MAPKAPK2/DENND1B/RIPK2/BST2/CD81/TNFRSF1B/CALHM6/LACC1/SMAD7/ACP5/IL18R1/KIT/CD74/IRF5/TBX21/PLCG2/BTK/XCL1/LILRB1/SYK	34
celltypes.CD4 T cell.down	celltypes	CD4 T cell	down	BP	GO:0032970	regulation of actin filament-based process	79/2018	350/14457	0.225714	1.61702	4.70663	7.10102e-06	0.000173543	0.000128891	ARPC5/CORO1B/DLG1/DSTN/RAC1/WDR1/PDE4D/ARPC2/WASHC2C/RHOA/ARF1/ARPC3/AKAP9/PIK3R1/SSH2/BRAF/DAPK3/ROCK1/WAS/NCKAP1L/FCHSD1/ARAP1/ADD1/TAOK2/MYH9/GRB2/AKAP13/CAMK2D/CYRIB/IQGAP2/VASP/SMAD3/ARHGAP17/CAPZA1/TRIOBP/ARF6/FCHSD2/PTGER4/HIP1R/F11R/ABL1/DVL3/RDX/TGFB1/NEDD9/TESK1/ARPC5L/INPPL1/GPR65/SSH1/PRKCD/PTK2B/RHOBTB2/CLASP1/MTPN/GBA2/ARFIP1/ARHGAP35/CDC42EP3/PDE4B/FLNA/BST2/TGFBR1/PREX1/CAPG/LIMK1…	79
celltypes.CD4 T cell.down	celltypes	CD4 T cell	down	BP	GO:0044089	positive regulation of cellular component biogenesis	99/2018	465/14457	0.212903	1.52524	4.63702	7.73837e-06	0.000186684	0.000138651	PARK7/APC/PPP2CA/STUB1/VCP/MAVS/MECP2/CLIP1/DLG1/VPS4B/CCP110/RAC1/RAP1B/CLSTN1/HSP90AA1/ARPC2/FMR1/WASHC2C/GSK3B/RAB3GAP2/RHOA/ACTR2/DYNC1H1/AKAP9/PIK3R1/NEK7/HSPA1A/CDK5RAP2/BRAF/ACTR3/ROCK1/HTT/WDR45/NCKAP1L/DCTN1/FCHSD1/ARAP1/GRB2/CPAP/TSG101/ATG2A/KCTD17/SLF1/MYD88/VASP/PIP4K2A/SMAD3/SNX30/LGALS3/MED25/SH3GLB1/MAD2L2/MIEN1/ARF6/FCHSD2/WARS1/PIEZO1/HIP1R/LCP1/ABL1/TFRC/PLEKHM1/TGFB1/MSN/TESK1…	99
celltypes.CD4 T cell.down	celltypes	CD4 T cell	down	BP	GO:0051648	vesicle localization	54/2018	215/14457	0.251163	1.79934	4.75615	8.53529e-06	0.000204157	0.000151628	ITGA4/KIF5B/USO1/CCDC186/BLOC1S6/AP3D1/SAR1A/CSNK1D/MECP2/PAFAH1B1/VPS4B/TMED9/CTNNB1/TMED10/TRAPPC8/AP1G1/EXOC5/VPS33A/DNM2/TRAPPC1/CUL3/AP3B1/STXBP2/KIF3B/HTT/DCTN1/SCRIB/FYCO1/FBXW11/TSG101/BLOC1S1/BLOC1S2/IRAG2/FAM91A1/TRAPPC2/KIF1B/ARFGAP3/SNAP23/SPG11/MYO5A/TESK1/DTNBP1/WIPI1/BAIAP3/CLASP1/STARD3NL/PICALM/WDR11/TCIRG1/PIK3CG/ACTN4/SYT11/RAB27A/TRAK1	54
celltypes.CD4 T cell.down	celltypes	CD4 T cell	down	BP	GO:0043299	leukocyte degranulation	24/2018	69/14457	0.347826	2.49183	5.00307	1.05124e-05	0.000244174	0.000181349	HLA-F/LAMP1/AP1G1/PDPK1/VAMP8/STXBP2/NCKAP1L/CD84/SNAP23/BCR/IL4R/PIK3CG/RAB27A/KIT/ITGAM/CD300A/KLRC2/PTGDR/LAT2/NKG7/FCGR3A/BTK/LYN/SYK	24
celltypes.CD4 T cell.down	celltypes	CD4 T cell	down	BP	GO:0045730	respiratory burst	15/2018	33/14457	0.454545	3.25637	5.22658	1.2185e-05	0.000273967	0.000203476	SELENOK/RAC1/LIPA/CAMK1D/CD52/CYBC1/GRN/BCR/CYBA/PIK3CG/DUSP10/NCF4/JCHAIN/CYBB/CD24	15
celltypes.CD4 T cell.down	celltypes	CD4 T cell	down	BP	GO:0060759	regulation of response to cytokine stimulus	44/2018	166/14457	0.26506	1.8989	4.69164	1.35704e-05	0.000302695	0.000224813	TRIM44/XIAP/MAVS/PAFAH1B1/LAPTM5/RIPK1/STAT2/PARP9/DICER1/TRIM56/HSPA1A/PTPN1/RIGI/SPPL2B/ADAM17/OTULIN/IRAK1/CASP4/TANK/CARD16/SPPL2A/HIF1A/IFIH1/PIAS3/MAPKAPK2/SH2B3/CASP1/GSTP1/OAS1/GFI1/VRK2/TNFAIP3/RIPK2/PARP14/IRAK2/CXCR4/TBK1/ZBP1/STAP1/CCL5/CD74/CD40/SYK/CD24	44
celltypes.CD4 T cell.down	celltypes	CD4 T cell	down	BP	GO:0007163	establishment or maintenance of cell polarity	53/2018	214/14457	0.247664	1.77427	4.5961	1.57815e-05	0.000344804	0.000256087	CAP1/KIF20B/PAFAH1B1/DLG1/RAC1/RAP1B/WDR1/GSK3B/CRKL/DOCK8/RHOA/ACTR2/MCPH1/GOLPH3/KAT5/CDK5RAP2/ACTR3/ROCK1/HTT/NCKAP1L/DCTN1/SCRIB/FBXW11/MYH9/DOCK2/CYRIB/ARF6/MAP4/ILK/SPN/ABL1/MSN/NHERF1/INPPL1/GPSM2/RHOBTB2/CLASP1/RUFY3/LLGL2/ARHGAP35/TCIRG1/ITGB1/CYTH3/SIPA1L3/DLG3/LMNA/RHOQ/CTNNA1/PLEKHG3/PHLDB2/CLIC4/GSN/CCL4	53
celltypes.CD4 T cell.down	celltypes	CD4 T cell	down	BP	GO:1903169	regulation of calcium ion transmembrane transport	38/2018	137/14457	0.277372	1.9871	4.67566	1.70187e-05	0.000366523	0.000272218	CALM2/TMBIM6/PPP3R1/DIAPH1/UCP2/PDPK1/PDE4D/FMR1/HTT/VDAC1/PRNP/CAMK2D/GNB5/STIM2/BCL2/ABL1/TGFB1/PTK2B/TMEM38A/G6PD/PDE4B/PPP3CA/CYBA/PIK3CG/SESTD1/AHNAK/PRKCE/P2RX5/RGS9/CXCR3/F2R/CD19/AKAP5/TSPAN13/MS4A1/XCL1/LYN/DMD	38
celltypes.CD4 T cell.down	celltypes	CD4 T cell	down	BP	GO:0071887	leukocyte apoptotic process	32/2018	108/14457	0.296296	2.12267	4.71679	1.8242e-05	0.000389956	0.000289622	RIPK1/AKT1/LIPA/CRKL/PRELID1/DOCK8/CASP3/ADAM17/SELENOS/LGALS3/BCL2/ST6GAL1/BCL6/RIPK3/HIF1A/NF1/RAPGEF2/CASP7/BCL2L11/ANXA1/PLEKHO2/BCL3/HSH2D/ADAM8/CCL5/CD74/CCR5/FASLG/BTK/MEF2C/LYN/LILRB1	32
celltypes.CD4 T cell.down	celltypes	CD4 T cell	down	BP	GO:0043112	receptor metabolic process	24/2018	71/14457	0.338028	2.42164	4.83661	1.82456e-05	0.000389956	0.000289622	OPTN/LAPTM5/USP9X/RAB29/PTPN1/ARAP1/SCRIB/NSF/PLEKHA3/SH3GLB1/CTSD/DTX3L/NEDD4L/UVRAG/TGFB1/CAPN1/ITCH/EPS15/FURIN/ANXA2/SNX25/ABCA2/MYLIP/EHD3	24
celltypes.CD4 T cell.down	celltypes	CD4 T cell	down	BP	GO:0008360	regulation of cell shape	36/2018	128/14457	0.28125	2.01488	4.6452	2.01854e-05	0.000428158	0.000317995	PRPF40A/MYL12B/DIAPH1/DLG1/RAC1/SH3KBP1/WDR1/BRWD3/DAPK3/ARAP1/TAOK2/MYH9/ZMPSTE24/FMNL3/FMNL1/GNA13/F11R/RDX/MSN/NHERF1/SEPTIN7/PTK2B/RHOBTB2/LIMD1/ARHGAP35/CDC42EP3/ANXA1/PLXNC1/EZR/GNA12/RHOQ/ARHGAP18/PLXND1/PALM2AKAP2/KIT/FGD2	36
celltypes.CD4 T cell.down	celltypes	CD4 T cell	down	BP	GO:0060816	random inactivation of X chromosome	9/2018	14/14457	0.642857	4.60544	5.43608	2.03672e-05	0.000430392	0.000319653	HNRNPU/HNRNPK/LBR/XIST/SPEN/PCGF5/PCGF3/JARID2/CDYL	9
celltypes.CD4 T cell.down	celltypes	CD4 T cell	down	BP	GO:0045936	negative regulation of phosphate metabolic process	58/2018	243/14457	0.238683	1.70993	4.49525	2.09704e-05	0.000436574	0.000324245	HNRNPU/CALM2/PARK7/APC/PPP2CA/TAF7/CIB1/PDPK1/PDE4D/AKT1/DNAJA1/CRKL/PPARA/HIPK3/PTPN1/NCOR1/DNAJC10/PRNP/SOCS4/PARP1/TSG101/SOCS5/SAMSN1/SIRT2/CDKN2D/DUSP1/WARS1/DYNLL1/ZC3H12A/ABL1/TESK1/CHP1/PTPRJ/RASSF2/PRKCD/MIDN/HEG1/RB1/GSTP1/PARP14/CDKN1A/PREX1/IQGAP1/ABCA2/LPCAT1/CORO1C/ZFYVE28/NIBAN1/PTPN22/DUSP10/RGS2/STAP1/PRR5L/CD300A/HHEX/PLEK/LYN/DMD	58
celltypes.CD4 T cell.down	celltypes	CD4 T cell	down	BP	GO:0031647	regulation of protein stability	75/2018	338/14457	0.221893	1.58965	4.41817	2.24617e-05	0.000460793	0.000342232	STK4/DAZAP2/TRIM44/PARK7/USP7/DDOST/FBXW7/SEL1L/STUB1/USP48/TMC6/GAPDH/LAMP1/EP300/CSNK2A1/USP34/UBR4/CREBBP/HSP90AA1/USP9X/BAG1/POLR2E/CUL3/VHL/PIK3R1/USP24/CASP3/HSPA1A/MCM8/MDM2/HTT/DDI2/MTMR9/FBXO7/FBXW11/PRNP/ATP1B3/USP12/USP8/HDAC8/SMAD3/TADA3/GRN/YWHAZ/SH3GLB1/SYVN1/BCL2/HIP1R/CTSA/DERL1/DVL3/NEDD4L/CMTM6/CHP1/RASSF2/PRKCD/QRSL1/EPHA4/MAPK1/FLNA/B4GALT5/CD81/SAV1/SMAD7/LMNA/MYLIP/RASSF1/US…	75
celltypes.CD4 T cell.down	celltypes	CD4 T cell	down	BP	GO:0016311	dephosphorylation	41/2018	154/14457	0.266234	1.90731	4.55924	2.35152e-05	0.00047891	0.000355688	CTDNEP1/PPP2CA/PPP1CC/PPTC7/SSH2/PTPN1/ROCK1/MTMR9/SGPP1/PPM1A/FBXW11/SACM1L/PPM1D/SBF1/PLPP5/PPP1R12A/PPP1CA/DUSP1/CTDSP1/PTPN7/PTPN18/CHP1/INPPL1/NT5C/PTPRJ/SSH1/PTPN4/FIG4/PPP3CA/PTPRE/IQGAP1/INPP5D/PTPN12/DUSP2/PTPN22/DUSP10/DAPP1/DUSP5/DUSP4/PLEK/MEF2C	41
celltypes.CD4 T cell.down	celltypes	CD4 T cell	down	BP	GO:0030595	leukocyte chemotaxis	46/2018	180/14457	0.255556	1.83081	4.51762	2.41538e-05	0.000488377	0.000362719	RAC1/ADAM10/PIKFYVE/CAMK1D/NCKAP1L/CKLF/HMGB1/ADAM17/LGALS3/BSG/SLC12A2/SLAMF1/DUSP1/NEDD9/STK39/PTPRJ/PTK2B/MAPK1/PDE4B/ANXA1/KLRK1/PREX1/PIK3CG/CCR6/CXCR4/LYST/TNFSF14/FCER1G/ADAM8/ITGA1/KIT/STAP1/CXCR5/SWAP70/CCL5/VAV3/CD74/DAPK2/ALOX5/CCR5/CX3CR1/CCL4/XCL1/LYN/SYK/CNR2	46
celltypes.CD4 T cell.down	celltypes	CD4 T cell	down	BP	GO:0051051	negative regulation of transport	77/2018	351/14457	0.219373	1.57159	4.36648	2.66985e-05	0.000534065	0.000396652	CALM2/PARK7/OS9/TMBIM6/PPP3R1/GNAI2/HLA-F/UCP2/VPS4B/CSK/RAC1/RAP1B/FAM76B/AKT1/FMR1/VAMP8/BRAF/SNX3/NCKAP1L/WWP2/VDAC1/PFKL/HMGB1/CAMK2D/GNB5/APPL1/SELENOS/OAZ2/LGALS3/CD84/SLC30A1/BARD1/ARF6/ACSL4/SP100/RAB11FIP5/BCL2/ANKRD13A/BCR/ABAT/NEDD4L/UBE2J1/NF1/TGFB1/NEO1/CHP1/NHERF1/STK39/YWHAQ/PTK2B/MIDN/FABP5/PRKCB/PICALM/ARFIP1/PXK/PEA15/ANXA1/PPP3CA/ANXA2/RAB11FIP1/PLSCR1/TNFRSF1B/RUBCN/ABCA2/SYT1…	77
celltypes.CD4 T cell.down	celltypes	CD4 T cell	down	BP	GO:1901873	regulation of post-translational protein modification	56/2018	235/14457	0.238298	1.70717	4.40221	3.03316e-05	0.000591992	0.000439675	GABARAP/TRIM44/PARK7/FBXW7/HUWE1/XIAP/STUB1/TCF25/VCP/LAPTM5/UBE2L3/CTNNB1/HSP90AA1/BMI1/AKT1/DNAJA1/GSK3B/NMI/ARNT/CUL3/BIRC3/HSPA1A/WBP1L/DNAJB2/TRAF6/SIRT7/HDAC8/ARRDC3/SIAH2/TNIP1/MAD2L2/SQSTM1/TANK/DTX3L/CBLB/ZC3H12A/UBB/ABL1/DERL1/HIF1A/PIAS3/AXIN1/ITCH/CHP1/CEP78/TNFAIP3/RIPK2/TGFBR1/LIMK1/ABCA2/RASSF1/HERPUD1/SPOPL/PRKCE/PTPN22/EGR1	56
celltypes.CD4 T cell.down	celltypes	CD4 T cell	down	BP	GO:0031346	positive regulation of cell projection organization	73/2018	330/14457	0.221212	1.58477	4.32821	3.20185e-05	0.00061732	0.000458486	TMEM30A/EIF4G2/APC/CORO1B/NRDC/EP300/PAFAH1B1/CCP110/RAC1/HSP90AA1/RAB8B/ARPC2/MAP2K1/FMR1/GOLGA4/GSK3B/ACTR2/CBFA2T2/NPTN/PIK3R1/CAMK1D/SHOC2/BRAF/ACTR3/SETX/SNX3/MAP2K2/HTT/ARAP1/TRPV2/CPAP/KCTD17/KAT2B/EHD1/SLC30A1/GRN/MIEN1/ARF6/MEGF8/MACF1/CFLAR/ABL1/DVL3/PLEKHM1/NEDD9/RAPGEF2/DEF8/SEPTIN7/SKIL/BMPR1A/PTK2B/FIG4/RUFY3/EPHA4/ARHGAP35/CDC42EP3/RAPGEF1/PLXNC1/FLNA/TGFBR1/TOX/LIMK1/SERPINI1/CORO…	73
celltypes.CD4 T cell.down	celltypes	CD4 T cell	down	BP	GO:0140895	cell surface toll-like receptor signaling pathway	21/2018	60/14457	0.35	2.50741	4.71262	3.32057e-05	0.000632709	0.000469915	TAX1BP1/PJA2/NMI/PIK3R1/TRAF6/MYD88/APPL1/IRAK1/SQSTM1/WDFY1/IFI35/OAS1/TNFAIP3/RIPK2/CYBA/IRAK2/TBK1/PRKCE/PTPN22/PIK3AP1/LYN	21
celltypes.CD4 T cell.down	celltypes	CD4 T cell	down	BP	GO:0030865	cortical cytoskeleton organization	20/2018	56/14457	0.357143	2.55858	4.70672	3.6392e-05	0.000681864	0.000506423	PAFAH1B1/DLG1/RAC1/WDR1/ROCK1/NCKAP1L/IQGAP2/FMNL3/FMNL1/TLN1/ARF6/LCP1/PTK2B/RHOBTB2/LLGL2/EZR/IQGAP1/RHOQ/KIF21A/PLEK	20
celltypes.CD4 T cell.down	celltypes	CD4 T cell	down	BP	GO:0007033	vacuole organization	54/2018	226/14457	0.238938	1.71176	4.34371	3.85759e-05	0.000720383	0.000535031	GABARAP/ATG4B/HOOK3/ATG12/RB1CC1/LAMP1/CHMP4B/CHMP4A/LAPTM5/VPS4B/ATP6AP1/RAB14/CHMP1B/MFN2/LIPA/HPS1/RAB3GAP2/VPS33A/PIKFYVE/ATP6V1D/AP3B1/VMA22/TPP1/ATG16L2/WDR45/HEXA/ATG2A/TRAF6/ATP6V0C/PIP4K2A/ATP6V0B/TMEM165/SNX30/CHMP1A/GRN/RAB1B/SH3GLB1/VPS18/CTSD/MAP1LC3B/SPG11/GNPTAB/ATG4D/WIPI1/FEZ2/FIG4/RALB/SNX18/TP53INP1/TCIRG1/ATP6V1A/ANXA2/GABARAPL1/TFEB	54
celltypes.CD4 T cell.down	celltypes	CD4 T cell	down	BP	GO:2001233	regulation of apoptotic signaling pathway	76/2018	350/14457	0.217143	1.55562	4.23822	4.32209e-05	0.000788782	0.000585831	STK4/HNRNPK/PARK7/P4HB/TMBIM6/GHITM/FBXW7/RB1CC1/GNAI2/CSNK2A1/RIPK1/CTNNB1/RAD9A/APAF1/BMI1/AKT1/DNAJA1/GSK3B/PRELID1/RBCK1/OPA1/ZMYND11/MADD/HSPA1A/HTRA2/PTPN1/MDM2/BIRC6/ACAA2/HTT/FBXO7/PARP1/GCLM/SELENOS/SIAH2/PSME3/CDKN2D/LGALS3/PPP1CA/SYVN1/SP100/BCL2/CFLAR/UBB/RIPK3/HIF1A/JAK2/NF1/PLEKHF1/EIF2AK3/NHERF1/SKIL/PRKCD/CTSC/RRM2B/BCL2L11/RB1/ITM2C/GSTP1/SLC25A4/PEA15/TNFAIP3/TGFBR1/NR4A2/ACSL5/…	76
celltypes.CD4 T cell.down	celltypes	CD4 T cell	down	BP	GO:1901136	carbohydrate derivative catabolic process	55/2018	233/14457	0.236052	1.69108	4.28338	4.70136e-05	0.000852463	0.000633127	PPP2CA/GAPDH/MGAT1/UCP2/EP300/M6PR/NUDT3/ADPGK/ZBTB20/TPI1/LDHA/NT5C2/PDE4D/LIPA/GNS/PPARA/OGA/ARNT/PGAM1/OGDH/NCOR1/EDEM2/PFKL/HEXA/MANBA/MBD4/EIF6/ZBTB7A/NEU1/NAGK/PFKP/NUDT16/NT5E/KAT2B/PRXL2C/SUMF1/HGSNAT/PFKFB2/HIF1A/TGFB1/IDS/DHTKD1/NT5C/PRKCD/FUCA1/GBA2/PDE4B/MAN1A1/ENPP4/GM2A/PDE4A/AOAH/APOBEC3C/APOBEC3G/BTK	55
celltypes.CD4 T cell.down	celltypes	CD4 T cell	down	BP	GO:0032418	lysosome localization	24/2018	75/14457	0.32	2.29249	4.52001	5.06208e-05	0.000906177	0.000673021	KIF5B/PDPK1/VPS33A/VAMP8/STXBP2/BORCS6/MYH9/RNF167/BLOC1S1/BLOC1S2/CD84/SNAP23/PLEKHM1/IL4R/DEF8/PIK3CG/TFEB/KIT/CD300A/PTGDR/LAT2/BTK/LYN/SYK	24
celltypes.CD4 T cell.down	celltypes	CD4 T cell	down	BP	GO:0033059	cellular pigmentation	21/2018	62/14457	0.33871	2.42652	4.53379	5.79255e-05	0.00101263	0.000752084	BLOC1S6/AP3D1/AP1G1/HPS1/VPS33A/PIKFYVE/AP3B1/RAB29/DCTN1/BLOC1S1/BLOC1S2/BCL2/MYO5A/HPS3/DTNBP1/AP1B1/RAB27A/LYST/AP1S3/CD63/ZEB2	21
celltypes.CD4 T cell.down	celltypes	CD4 T cell	down	BP	GO:0070059	intrinsic apoptotic signaling pathway in response to endoplasmic reticulum stress	21/2018	62/14457	0.33871	2.42652	4.53379	5.79255e-05	0.00101263	0.000752084	PARK7/TMBIM6/SELENOK/APAF1/OPA1/PPP1R15A/HSPA1A/PTPN1/DNAJC10/SELENOS/SYVN1/CASP4/BCL2/ERN1/EIF2AK3/BCL2L11/ITPR1/MAP3K5/ATP2A3/HERPUD1/PMAIP1	21
celltypes.CD4 T cell.down	celltypes	CD4 T cell	down	BP	GO:0034976	response to endoplasmic reticulum stress	61/2018	268/14457	0.227612	1.63062	4.1971	5.87293e-05	0.00101263	0.000752084	UBXN4/PARK7/P4HB/OS9/TMBIM6/AUP1/SEL1L/STUB1/SELENOK/VCP/PDIA6/SEC61B/UGGT1/APAF1/AKT1/TMCO1/GSK3B/TMX1/ATF6B/OPA1/PPP1R15A/PIK3R1/HSPA1A/PTPN1/CERT1/MAN1A2/ECPAS/EDEM2/ERP44/DNAJC10/DNAJB2/RNF121/SELENOS/AKT3/EIF2AK2/SYVN1/CASP4/BCL2/HERPUD2/ABL1/DERL1/ERN1/AMFR/UBE2J1/EIF2AK3/PARP8/CREB3L2/BCL2L11/ITPR1/SESN2/MAP3K5/JUN/ATP2A3/ERMP1/MAN1A1/HERPUD1/PMAIP1/NIBAN1/MAP3K20/ALOX5/MARCKS	61
celltypes.CD4 T cell.down	celltypes	CD4 T cell	down	BP	GO:0032535	regulation of cellular component size	72/2018	331/14457	0.217523	1.55834	4.13898	6.41134e-05	0.00108223	0.000803774	EIF4G2/ARPC5/RAB22A/RB1CC1/PAFAH1B1/DLG1/DSTN/AP2M1/RAC1/TTL/HSP90AA1/WDR1/ARPC2/GOLGA4/WASHC2C/GSK3B/DNM2/RHOA/CLCN3/RNF6/ARPC3/LAMTOR5/BORCS6/SSH2/WAS/NCKAP1L/FCHSD1/ADD1/GRB2/TRPV2/CYRIB/BLOC1S1/VASP/AKT3/BLOC1S2/WDTC1/CAPZA1/TRIOBP/SLC12A2/ARF6/FCHSD2/MEGF8/HIP1R/MACF1/ABL1/CLCN6/RDX/MSN/ARPC5L/NHERF1/STK39/SSH1/PRKCD/PTK2B/RUFY3/MTPN/PICALM/GBA2/ARHGAP35/CDC42EP3/PREX1/EZR/CAPG/LIMK1/ARHGAP1…	72
celltypes.CD4 T cell.down	celltypes	CD4 T cell	down	BP	GO:1990849	vacuolar localization	24/2018	76/14457	0.315789	2.26232	4.44401	6.43061e-05	0.00108223	0.000803776	KIF5B/PDPK1/VPS33A/VAMP8/STXBP2/BORCS6/MYH9/RNF167/BLOC1S1/BLOC1S2/CD84/SNAP23/PLEKHM1/IL4R/DEF8/PIK3CG/TFEB/KIT/CD300A/PTGDR/LAT2/BTK/LYN/SYK	24
celltypes.CD4 T cell.down	celltypes	CD4 T cell	down	BP	GO:0022411	cellular component disassembly	87/2018	420/14457	0.207143	1.48398	4.05418	7.6974e-05	0.00128009	0.000950729	KIF5B/GABARAP/CTDNEP1/APC/CFL1/ATG12/SUPT16H/TCF25/VCP/CLTC/GOLGA2/CIB1/CHMP4B/PAFAH1B1/CHMP4A/DSTN/VPS4B/SMARCD2/WDR1/ATAD2B/APAF1/CHMP1B/DICER1/WASHC2C/GSK3B/VPS33A/SNX14/ADAM10/SMARCE1/VAMP8/KAT5/PIK3R1/SETX/TFIP11/DNASE2/DCTN1/FYCO1/ADD1/GAK/NSF/ZMPSTE24/TSG101/KDM4A/MAPRE2/PLIN3/CAPZA1/TRIOBP/CHMP1A/NAPB/CKAP2/ARF6/MAP4/MTRF1L/MAP1LC3B/LCP1/TBC1D25/UVRAG/RDX/TGFB1/NEDD9/IQSEC1/SMARCB1/CLASP1…	87
celltypes.CD4 T cell.down	celltypes	CD4 T cell	down	BP	GO:0006470	protein dephosphorylation	27/2018	91/14457	0.296703	2.12559	4.33835	7.79916e-05	0.00129299	0.000960309	CTDNEP1/PPP2CA/PPP1CC/PPTC7/SSH2/PTPN1/PPM1A/FBXW11/PPM1D/SBF1/PPP1R12A/PPP1CA/DUSP1/CTDSP1/PTPN7/PTPN18/PTPRJ/SSH1/PTPN4/PPP3CA/PTPRE/PTPN12/DUSP2/PTPN22/DUSP10/DAPP1/DUSP5	27
celltypes.CD4 T cell.down	celltypes	CD4 T cell	down	BP	GO:0045859	regulation of protein kinase activity	72/2018	335/14457	0.214925	1.53973	4.02572	9.55492e-05	0.00151291	0.00112364	CALM2/APC/PPP2CA/FBXW7/TAOK3/TAF7/CDK12/CIB1/RAP2B/PDPK1/SYAP1/AKT1/MAP2K1/DNAJA1/RHOA/ABI1/ZFP91/HIPK3/PTPN1/PILRB/MAP2K2/HERC5/TAOK2/ADAM17/SOCS4/TSG101/TRAF6/SOCS5/CDKN2D/DIPK2A/DUSP1/WARS1/KSR1/BLM/ABL1/RAP2C/RIPK3/UVRAG/ERN1/JAK2/NEDD9/TESK1/AXIN1/CHP1/RAPGEF2/NHERF1/PTPRJ/RASSF2/MAP2K3/PRKCD/PTK2B/RALB/HEG1/RB1/EPHA4/GSTP1/MAP3K5/TRAF4/CDKN1A/PREX1/IQGAP1/PIK3CG/CORO1C/ZFYVE28/PTPN22/DUSP10…	72
celltypes.CD4 T cell.down	celltypes	CD4 T cell	down	BP	GO:0034612	response to tumor necrosis factor	48/2018	201/14457	0.238806	1.71081	4.08739	0.000102808	0.00162327	0.00120561	XIAP/ZFP36L2/CIB1/LAPTM5/RIPK1/DICER1/AKT1/ADAM10/ZFP36/RORA/NUB1/BIRC3/CASP3/HSPA1A/SPPL2B/ADAM17/OTULIN/ZFAND6/ASAH1/GBP3/FOXO3/CASP4/TANK/ILK/CARD16/ZC3H12A/SPPL2A/JAK2/PIAS3/MAPKAPK2/ZFP36L1/CASP1/PTK2B/GSTP1/MAP3K5/MAPK1/TNFAIP3/TNFRSF1B/ACTN4/FOS/YBX3/CD58/AFF3/CCL5/TNFRSF13C/CD40/CX3CR1/SYK	48
celltypes.CD4 T cell.down	celltypes	CD4 T cell	down	BP	GO:0141060	disruption of anatomical structure in another organism	20/2018	60/14457	0.333333	2.38801	4.33934	0.000111282	0.00173754	0.00129048	HMGN2/USP7/GAPDH/CSNK2A1/TUSC2/GZMM/MYD88/GBP3/LGALS3/MICB/H2BC12/APOL1/GBP5/PRF1/GZMA/NKG7/GNLY/GZMH/GZMB/XCL1	20
celltypes.CD4 T cell.down	celltypes	CD4 T cell	down	BP	GO:0061028	establishment of endothelial barrier	16/2018	43/14457	0.372093	2.66568	4.40582	0.000123433	0.00189051	0.00140409	RAP1B/PDE4D/ROCK1/ADD1/MYD88/F11R/RAP2C/RDX/AFDN/MSN/RAPGEF2/VCL/RAPGEF1/EZR/PPP1R16B/PLCB1	16
celltypes.CD4 T cell.down	celltypes	CD4 T cell	down	BP	GO:1902903	regulation of supramolecular fiber organization	76/2018	362/14457	0.209945	1.50405	3.91189	0.000137183	0.00207286	0.00153952	ARPC5/PARK7/APC/CORO1B/MECP2/CIB1/CLIP1/DLG1/DSTN/RAC1/WDR1/ARPC2/WASHC2C/RHOA/ARF1/ARPC3/AKAP9/PIK3R1/HSPA1A/CDK5RAP2/SSH2/BRAF/DAPK3/ROCK1/WAS/NCKAP1L/DCTN1/FCHSD1/ARAP1/ADD1/GRB2/AKAP13/CYRIB/USP8/VASP/SMAD3/CAPZA1/TRIOBP/CKAP2/ARF6/FCHSD2/PTGER4/HIP1R/F11R/ABL1/RDX/TESK1/ARPC5L/INPPL1/GPR65/SSH1/PRKCD/TBCD/PTK2B/RB1/CLASP1/MTPN/GBA2/ARFIP1/ARHGAP35/CDC42EP3/FLNA/TGFBR1/PREX1/CAPG/LIMK1/KIF21A…	76
celltypes.CD4 T cell.down	celltypes	CD4 T cell	down	BP	GO:0045937	positive regulation of phosphate metabolic process	89/2018	440/14457	0.202273	1.44909	3.85319	0.000154111	0.00230387	0.00171109	STK4/CALM2/PARK7/RALBP1/PPP2CA/FBXW7/TAOK3/VCP/MAVS/CSNK1D/CIB1/RIPK1/RAC1/ZBTB20/PARP9/PDPK1/SYAP1/AKT1/MAP2K1/CRKL/PPARA/RHOA/KCTD20/ABI1/ZFP91/ARNT/AKAP9/NPTN/NBN/BRAF/PTPN1/PILRB/ROCK1/MAP2K2/MTMR9/TAOK2/ADAM17/PRNP/TRAF6/KAT2B/PRXL2C/DIPK2A/MAD2L2/ABL1/DVL3/RAP2A/RIPK3/TFRC/HIF1A/ERN1/JAK2/TGFB1/NEDD9/TESK1/AXIN1/CHP1/RAPGEF2/PTPRJ/RASSF2/MAP2K3/PRKCD/LMO4/PTK2B/RALB/EPHA4/CAPN2/MAP3K5/MAPK1…	89
celltypes.CD4 T cell.down	celltypes	CD4 T cell	down	BP	GO:0009611	response to wounding	99/2018	500/14457	0.198	1.41848	3.83577	0.000155189	0.00231384	0.00171849	CORO1B/BLOC1S6/ZFP36L2/CHMP4B/CHMP4A/VPS4B/RAC1/RAP2B/CHMP1B/MAP2K1/TMX1/PPARA/RHOA/ZFP36/AP3B1/CASP3/BRAF/MAP2K2/WAS/JMJD1C/FIBP/SCRIB/ADAM17/MYH9/WDR83/FERMT3/ADIPOR2/SMAD3/CHMP1A/GRN/DGKD/SLC12A2/PRCP/TLN1/GNA13/ILK/BCL2/F11R/MACF1/CFLAR/HIF1A/JAK2/NF1/CD9/TGFB1/ITPK1/NEO1/DTNBP1/ZFP36L1/CD151/ABHD2/PTPRJ/EXTL3/SH2B3/PRKCD/VCL/CASP7/CLASP1/EPHA4/ARHGAP35/ANXA5/ANXA1/TNFAIP3/PPP3CA/ITGB1/VASH1/…	99
celltypes.CD4 T cell.down	celltypes	CD4 T cell	down	BP	GO:0043434	response to peptide hormone	85/2018	417/14457	0.203837	1.46029	3.84158	0.000164273	0.00242153	0.00179848	MT-CYB/JAK1/TRIM44/USO1/MAPKAP1/APC/PTPRA/GNAI2/UCP2/VPS13C/ZNF106/CSK/ADIPOR1/STAT2/CYC1/PDPK1/SYAP1/STAT6/EIF4EBP2/AKT1/GSK3B/PPARA/CUL3/PIK3R1/SHOC2/ARID1B/BRAF/PTPN1/MDM2/BTG2/SOS1/HDAC5/ROCK1/CAT/SNX5/GRB2/PARP1/EIF6/APPL1/NCOA1/LTA4H/SELENOS/PIP4K2A/SOS2/SMAD3/WDTC1/KAT2B/BSG/RAB8A/NCOA2/ZDHHC7/CTSD/SIK2/FOXO4/CFLAR/JAK2/TGFB1/MYO5A/STAT4/INPPL1/ZFP36L1/PTPRJ/PRKCD/RB1/ATP2B1/PRKCB/EPHA4/SE…	85
celltypes.CD4 T cell.down	celltypes	CD4 T cell	down	BP	GO:0035967	cellular response to topologically incorrect protein	30/2018	110/14457	0.272727	1.95382	4.04461	0.000175716	0.00253908	0.00188578	OS9/TMBIM6/DNAJB14/STUB1/VCP/OPTN/UBR4/AKT1/ATF6B/CUL3/PPP1R15A/PIK3R1/HSPA1A/PTPN1/EDEM2/UBE2W/DNAJC10/SELENOS/AKT3/EIF2AK2/HERPUD2/DERL1/ERN1/AMFR/AKIRIN2/EIF2AK3/PARP8/BCL2L11/ERMP1/HERPUD1	30
celltypes.CD4 T cell.down	celltypes	CD4 T cell	down	BP	GO:0097352	autophagosome maturation	20/2018	62/14457	0.322581	2.31098	4.16655	0.000185109	0.00265433	0.00197138	GABARAP/ATG12/VCP/CHMP4B/CHMP4A/VPS4B/CHMP1B/VPS33A/SNX14/VAMP8/FYCO1/TSG101/CHMP1A/MAP1LC3B/TBC1D25/UVRAG/RUBCN/GABARAPL1/ADRB2/RUBCNL	20
celltypes.CD4 T cell.down	celltypes	CD4 T cell	down	BP	GO:0001771	immunological synapse formation	8/2018	14/14457	0.571429	4.09373	4.66455	0.000194436	0.00275296	0.00204463	DLG1/DOCK8/DOCK2/LGALS3/NEDD9/MSN/CD81/PRF1	8
celltypes.CD4 T cell.down	celltypes	CD4 T cell	down	BP	GO:0036446	myofibroblast differentiation	7/2018	11/14457	0.636364	4.55892	4.75591	0.000201249	0.00280005	0.00207961	PARP1/TGFB1/RB1/TP53INP1/TGFBR1/FOSL2/ZEB2	7
celltypes.CD4 T cell.down	celltypes	CD4 T cell	down	BP	GO:0043320	natural killer cell degranulation	7/2018	11/14457	0.636364	4.55892	4.75591	0.000201249	0.00280005	0.00207961	HLA-F/LAMP1/AP1G1/RAB27A/KLRC2/NKG7/FCGR3A	7
celltypes.CD4 T cell.down	celltypes	CD4 T cell	down	BP	GO:0150116	regulation of cell-substrate junction organization	21/2018	67/14457	0.313433	2.24544	4.11549	0.000203368	0.00280867	0.00208601	PTPRA/RAC1/RHOA/SLK/PIK3R1/DAPK3/ROCK1/MAPRE2/SMAD3/TLN1/ARF6/MACF1/ABL1/PEAK1/DUSP22/PTPRJ/IQSEC1/VCL/CLASP1/CORO1C/PHLDB2	21
celltypes.CD4 T cell.down	celltypes	CD4 T cell	down	BP	GO:0007030	Golgi organization	36/2018	142/14457	0.253521	1.81623	3.93689	0.000210188	0.00287461	0.00213499	VTI1B/USO1/HUWE1/RAB2A/OPTN/CSNK1D/GOLGA2/TMED9/SEC23IP/TMED10/TRAPPC8/MAP2K1/VCPIP1/ARL1/GOLPH3/AKAP9/RAB29/TMED5/MAP2K2/HTT/ATL3/SURF4/GAK/GOLGB1/PI4K2A/TANGO2/RAB1B/RAB8A/YWHAZ/DYNC2H1/CLASP1/MAPK1/SYNE1/RAB30/USP6NL/EHD3	36
celltypes.CD4 T cell.down	celltypes	CD4 T cell	down	BP	GO:0098760	response to interleukin-7	10/2018	21/14457	0.47619	3.41144	4.45404	0.000222023	0.00300721	0.00223347	ATP5F1B/JAK1/P4HB/IL2RG/CRKL/STIP1/RAD23B/LSP1/FOSL2/BTK	10
celltypes.CD4 T cell.down	celltypes	CD4 T cell	down	BP	GO:0035966	response to topologically incorrect protein	38/2018	153/14457	0.248366	1.7793	3.90313	0.000224006	0.00302677	0.00224799	UBXN4/OS9/TMBIM6/DNAJB14/STUB1/VCP/OPTN/UBR4/HSP90AA1/MFN2/AKT1/DNAJA1/ATF6B/CUL3/PPP1R15A/PIK3R1/HSPA1A/PTPN1/HSPA4/EDEM2/ERP44/UBE2W/DNAJC10/DNAJB2/SELENOS/AKT3/EIF2AK2/HERPUD2/DERL1/ERN1/AMFR/AKIRIN2/EIF2AK3/PARP8/CREB3L2/BCL2L11/ERMP1/HERPUD1	38
celltypes.CD4 T cell.down	celltypes	CD4 T cell	down	BP	GO:0097305	response to alcohol	50/2018	219/14457	0.228311	1.63562	3.81758	0.000242373	0.00323606	0.00240343	MT-CYB/MT-ND4/XRN1/MECP2/CTNNB1/H6PD/AKT1/LIPA/GNB1/PPARA/GOLPH3/ITPR2/PSMD14/MDM2/BTG2/CAT/FECH/PARP1/ADCY7/MYD88/SDF4/FOXO3/RGS19/PTGER4/ST6GAL1/BLM/ABAT/TGFB1/STK39/CPT1A/GNG2/PTK2B/PRKCB/G6PD/PPP1R9B/SPIDR/TP53INP1/PTCH1/TGFBR1/CDKN1A/ABCA2/FOS/CTNNA1/PRKCE/RGS2/PTGER2/TGFBR3/CCR5/PTGDR/CYBB	50
celltypes.CD4 T cell.down	celltypes	CD4 T cell	down	BP	GO:0044090	positive regulation of vacuole organization	11/2018	25/14457	0.44	3.15217	4.33786	0.00025697	0.00339067	0.00251826	RAB3GAP2/WDR45/ATG2A/PIP4K2A/SNX30/GRN/SH3GLB1/WIPI1/RALB/SNX18/ANXA2	11
celltypes.CD4 T cell.down	celltypes	CD4 T cell	down	BP	GO:0010761	fibroblast migration	17/2018	50/14457	0.34	2.43577	4.09614	0.000273353	0.00356462	0.00264745	RAC1/AKT1/BRAF/APPL1/GNA13/ILK/TGFB1/NHERF1/SGPL1/ITGB1/ARID5B/IQGAP1/GNA12/CORO1C/PRKCE/PRR5L/ZEB2	17
celltypes.CD4 T cell.down	celltypes	CD4 T cell	down	BP	GO:1990090	cellular response to nerve growth factor stimulus	16/2018	46/14457	0.347826	2.49183	4.08173	0.000305636	0.00391339	0.00290649	CSNK1D/CIB1/AKT1/ARPC3/SHOC2/BRAF/RAB35/PTPN1/PARP1/USP8/EHD1/FOXO3/ARF6/BPTF/RAPGEF2/RAPGEF1	16
celltypes.CD4 T cell.down	celltypes	CD4 T cell	down	BP	GO:0045453	bone resorption	18/2018	55/14457	0.327273	2.34459	4.02394	0.000313255	0.00399276	0.00296544	CSK/CTNNB1/TPP1/TRAF6/TFRC/PLEKHM1/NF1/DEF8/PTK2B/TCIRG1/TNFAIP3/CD38/INPP5D/ACP5/SNX10/ADAM8/ADRB2/SYK	18
celltypes.CD4 T cell.down	celltypes	CD4 T cell	down	BP	GO:0075294	positive regulation by symbiont of entry into host	8/2018	15/14457	0.533333	3.82081	4.40249	0.000365686	0.00458821	0.00340768	P4HB/HMGB1/BSG/TRIM38/LGALS1/FURIN/CD74/HLA-DRB1	8
celltypes.CD4 T cell.down	celltypes	CD4 T cell	down	BP	GO:0090066	regulation of anatomical structure size	87/2018	440/14457	0.197727	1.41652	3.57379	0.0003982	0.00496293	0.00368599	ITGA4/EIF4G2/ARPC5/RAB22A/STUB1/RB1CC1/BLOC1S6/PAFAH1B1/DLG1/DSTN/AP2M1/RAC1/TTL/HSP90AA1/WDR1/ARPC2/GOLGA4/WASHC2C/GSK3B/DNM2/RHOA/CLCN3/RNF6/ARPC3/LAMTOR5/BORCS6/SSH2/ROCK1/WAS/NCKAP1L/FCHSD1/ADD1/GRB2/TRPV2/CYRIB/BLOC1S1/GCLM/VASP/AKT3/BLOC1S2/WDTC1/CAPZA1/KAT2B/TRIOBP/SCPEP1/SLC12A2/ARF6/FCHSD2/MEGF8/HIP1R/MACF1/ABL1/CLCN6/RDX/MSN/ARPC5L/NHERF1/STK39/SSH1/PRKCD/PTK2B/RUFY3/ATP2B1/MTPN/PICALM/…	87
celltypes.CD4 T cell.down	celltypes	CD4 T cell	down	BP	GO:0031640	killing of cells of another organism	18/2018	56/14457	0.321429	2.30272	3.93406	0.000402149	0.00496909	0.00369056	HMGN2/GAPDH/TUSC2/GZMM/MYD88/GBP3/LGALS3/MICB/H2BC12/APOL1/GBP5/PRF1/GZMA/NKG7/GNLY/GZMH/GZMB/XCL1	18
celltypes.CD4 T cell.down	celltypes	CD4 T cell	down	BP	GO:0141061	disruption of cell in another organism	18/2018	56/14457	0.321429	2.30272	3.93406	0.000402149	0.00496909	0.00369056	HMGN2/GAPDH/TUSC2/GZMM/MYD88/GBP3/LGALS3/MICB/H2BC12/APOL1/GBP5/PRF1/GZMA/NKG7/GNLY/GZMH/GZMB/XCL1	18
celltypes.CD4 T cell.down	celltypes	CD4 T cell	down	BP	GO:0006968	cellular defense response	16/2018	47/14457	0.340426	2.43882	3.97937	0.000403998	0.00496909	0.00369056	VEZF1/LSP1/SPN/PTK2B/TCIRG1/ITGB1/CCR6/KLRG1/KLRC3/PRF1/KLRC2/CCR5/NCR1/CX3CR1/GNLY/TYROBP	16
celltypes.CD4 T cell.down	celltypes	CD4 T cell	down	BP	GO:1990089	response to nerve growth factor	16/2018	47/14457	0.340426	2.43882	3.97937	0.000403998	0.00496909	0.00369056	CSNK1D/CIB1/AKT1/ARPC3/SHOC2/BRAF/RAB35/PTPN1/PARP1/USP8/EHD1/FOXO3/ARF6/BPTF/RAPGEF2/RAPGEF1	16
celltypes.CD4 T cell.down	celltypes	CD4 T cell	down	BP	GO:0002832	negative regulation of response to biotic stimulus	31/2018	121/14457	0.256198	1.83541	3.71681	0.000461311	0.00554066	0.00411507	ATG12/MAVS/HLA-F/HLA-A/STAT2/NT5C2/SERPINB9/NMI/HLA-B/ILRUN/GRB2/PARP1/GRN/YWHAZ/TRIM38/CARD16/MICB/TGFB1/ITCH/IFI16/LYAR/OAS1/TNFAIP3/PARP14/INPP5D/TIGIT/DUSP10/DTX4/KLRC1/KLRD1/LILRB1	31
celltypes.CD4 T cell.down	celltypes	CD4 T cell	down	BP	GO:0051452	intracellular pH reduction	17/2018	52/14457	0.326923	2.34208	3.90496	0.000462657	0.00554498	0.00411827	ATP6V0E1/LAMP1/ATP6AP1/CLCN3/ATP6V1D/VMA22/ATP6V0C/ATP6V0B/GRN/BCL2/DMXL1/ATP6V0D1/TCIRG1/ATP6V1A/SLC9A7/CLIC4/FASLG	17
celltypes.CD4 T cell.down	celltypes	CD4 T cell	down	BP	GO:0051090	regulation of DNA-binding transcription factor activity	61/2018	288/14457	0.211806	1.51738	3.57214	0.000472701	0.00562935	0.00418094	USP7/TAX1BP1/MAVS/EGLN1/EP300/CIB1/RIPK1/KDM5A/AKT1/RBCK1/CAMK1D/LAMTOR5/HSPA1A/HDAC5/WWP2/OTULIN/PRNP/TRAF6/ZBTB7A/MYD88/SMAD3/TCF3/IRAK1/EIF2AK2/MAD2L2/TRIM38/TRIM26/SP100/CARD11/CARD16/ZC3H12A/TRIM22/CFLAR/RIPK3/TFRC/ITCH/CHP1/ID3/SMARCB1/RB1/MTPN/GFI1/TNFAIP3/PTCH1/RIPK2/FLNA/ARID5B/BCL3/IRAK2/ID2/IL18R1/CD200/ANXA4/KIT/BHLHE40/IL18RAP/EOMES/PLCG2/BTK/XCL1/SYK	61
celltypes.CD4 T cell.down	celltypes	CD4 T cell	down	BP	GO:0039531	regulation of cytoplasmic pattern recognition receptor signaling pathway	30/2018	116/14457	0.258621	1.85276	3.71416	0.000476505	0.00566265	0.00420567	TAX1BP1/PPP2CA/XIAP/MAVS/AKT1/NEK7/BIRC3/HSPA1A/HMGB1/PARP1/MYD88/ABHD17A/NAGK/SIRT2/EIF2AK2/DDX60/RIOK3/WDFY1/ITCH/IFI16/GRAMD4/TNFAIP3/CGAS/GBP5/PTPN22/SLC15A4/OASL/FCRL3/PLCG2/BTK	30
celltypes.CD4 T cell.down	celltypes	CD4 T cell	down	BP	GO:0001892	embryonic placenta development	21/2018	71/14457	0.295775	2.11894	3.80677	0.000492145	0.00581165	0.00431633	STK4/EGLN1/AKT1/MAP2K1/ARNT/BIRC6/RBPJ/GRB2/DNAJB6/NCOA1/SETD2/HS6ST1/BPTF/HIF1A/ZFP36L1/MAPK1/VASH1/TFEB/PRDM1/EOMES/ST14	21
celltypes.CD4 T cell.down	celltypes	CD4 T cell	down	BP	GO:0090174	organelle membrane fusion	31/2018	122/14457	0.254098	1.82037	3.66506	0.000537254	0.00622469	0.0046231	VTI1B/USO1/CHMP4B/CHMP4A/RAB14/CHMP1B/VCPIP1/VPS33A/PIKFYVE/VAMP8/STX8/RUFY1/RAB4B/VPS41/SAMD9/PIP4K2A/IRAG2/CHMP1A/RAB8A/VPS18/SLAMF1/SNAP23/SPG11/UVRAG/PLEKHM1/ANXA1/ANXA2/SYT11/STX7/VAV3/RUBCNL	31
celltypes.CD4 T cell.down	celltypes	CD4 T cell	down	BP	GO:0051653	spindle localization	19/2018	62/14457	0.306452	2.19543	3.79931	0.000551964	0.00631936	0.00469341	CFL1/KPNB1/PAFAH1B1/ACTR2/DYNC1H1/MCPH1/KAT5/CDK5RAP2/ACTR3/HTT/DCTN1/FBXW11/MYH9/MAP4/INPPL1/GPSM2/CLASP1/LLGL2/ITGB1	19
celltypes.CD4 T cell.down	celltypes	CD4 T cell	down	BP	GO:0033028	myeloid cell apoptotic process	12/2018	31/14457	0.387097	2.77317	3.98062	0.000566772	0.00646213	0.00479944	LIPA/ADAM17/SELENOS/ARF6/BCL2/ST6GAL1/NF1/ANXA1/PLEKHO2/CCL5/CCR5/MEF2C	12
celltypes.CD4 T cell.down	celltypes	CD4 T cell	down	BP	GO:0034341	response to type II interferon	29/2018	112/14457	0.258929	1.85497	3.65849	0.000574958	0.00651687	0.00484011	KIF5B/JAK1/GAPDH/PARP9/ACTR2/NUB1/ACTR3/STX8/DAPK3/WAS/GBP3/SP100/IFNGR1/GBP4/JAK2/CASP1/IRF1/PARP14/BST2/GBP5/CD58/GSN/CCL5/CD74/CD40/HLA-DPA1/CIITA/FASLG/IRF8	29
celltypes.CD4 T cell.down	celltypes	CD4 T cell	down	BP	GO:0000910	cytokinesis	41/2018	177/14457	0.231638	1.65946	3.55554	0.00061871	0.00692783	0.00514533	PRPF40A/CALM2/SEPTIN2/SON/APC/CFL1/KIF20B/CHMP4B/CHMP4A/VPS4B/CCP110/EXOC5/CHMP1B/RHOA/ACTR2/ARF1/CUL3/RAB35/KIF3B/ACTR3/BIRC6/ROCK1/MYH9/IQGAP2/USP8/SETD2/SEPTIN11/CHMP1A/CKAP2/SH3GLB1/ARF6/RAB11FIP4/UVRAG/SEPTIN7/LUZP1/SNX18/IQGAP1/RHOB/PRKCE/RHOC/CXCR5	41
celltypes.CD4 T cell.down	celltypes	CD4 T cell	down	BP	GO:0009100	glycoprotein metabolic process	71/2018	350/14457	0.202857	1.45327	3.45755	0.000630574	0.00703228	0.0052229	DDOST/TMEM59/MGAT1/GOLGA2/UGGT1/CTNNB1/MGAT2/GNS/FAM20B/OGA/TM9SF2/GOLPH3/MAN2A2/GXYLT1/MAN1A2/EDEM2/ERP44/CHPF2/HEXA/SLC35B2/MGAT5/MANBA/GALNT1/TMEM165/ST3GAL2/BPNT2/TNIP1/RAB1B/SYVN1/HS6ST1/BCL2/ST6GAL1/GALNT11/HGSNAT/GNPTAB/HIF1A/AMFR/CHSY1/UBE2J1/GALNT10/IDS/CHP1/CHST14/ST3GAL5/UGDH/EXTL3/B3GNT2/ST8SIA4/FUT11/ST6GALNAC6/ITM2C/TET2/CHST11/B4GALT5/TMEM106A/DPY19L1/GALNT6/DSE/ABCA2/MAN1A1/PLCB1/…	71
celltypes.CD4 T cell.down	celltypes	CD4 T cell	down	BP	GO:0010721	negative regulation of cell development	50/2018	229/14457	0.218341	1.5642	3.46632	0.000724856	0.00797341	0.00592188	FBXW7/HOOK3/RC3H2/MECP2/RC3H1/CTNNB1/DICER1/DNAJB11/GSK3B/QKI/SKI/RNF6/PIK3R1/BTG2/FBXO7/HMGB1/KDM4A/SOCS5/SIRT2/TSC22D1/BCL6/ZC3H12A/CTDSP1/CD69/NF1/TOB2/TGFB1/IL4R/PIAS3/RAPGEF2/LGALS1/BMPR1A/RB1/RUFY3/YWHAH/IRF1/ANXA1/PPP3CA/INPP5D/SMAD7/RUNX3/ID2/CTNNA1/DUSP10/BCL11A/GPR68/CD74/TBX21/LYN/LILRB1	50
celltypes.CD4 T cell.down	celltypes	CD4 T cell	down	BP	GO:0048545	response to steroid hormone	59/2018	281/14457	0.209964	1.50419	3.43766	0.00072912	0.00799953	0.00594128	HNRNPU/PARK7/TAF7/ZFP36L2/UCP2/EP300/PDCD7/UBE2L3/CALCOCO1/KMT2D/BMI1/DNAJA1/PPARA/RHOA/ZFP36/RNF6/RBBP7/TMF1/CASP3/HSPA1A/MDM2/NCOR1/NR3C1/FECH/PARP1/TXNIP/ZBTB7A/NCOA1/USP8/JUND/TADA3/FOXO3/VPS18/NCOA2/ZDHHC7/BCL2/CFLAR/JAK2/TGFB1/STK39/ZFP36L1/ABHD2/BCL2L11/PMEPA1/PPP1R9B/YWHAH/MAPK1/JUN/ANXA1/ZMIZ1/CDKN1A/ABCA2/CD38/RXRA/NPC1/FOS/PTGER2/FOSL2/CYBB	59
celltypes.CD4 T cell.down	celltypes	CD4 T cell	down	BP	GO:0043473	pigmentation	26/2018	98/14457	0.265306	1.90066	3.60332	0.000730076	0.00799953	0.00594128	BLOC1S6/AP3D1/AP1G1/HPS1/VPS33A/PIKFYVE/AP3B1/RAB29/DCTN1/BLOC1S1/BLOC1S2/BCL2/NF1/MYO5A/HPS3/DTNBP1/FIG4/BCL2L11/AP1B1/RAB27A/LYST/AP1S3/CD63/KIT/ZEB2/MEF2C	26
celltypes.CD4 T cell.down	celltypes	CD4 T cell	down	BP	GO:0010762	regulation of fibroblast migration	13/2018	36/14457	0.361111	2.58701	3.83994	0.000735851	0.00801593	0.00595346	RAC1/AKT1/BRAF/APPL1/GNA13/TGFB1/NHERF1/ITGB1/GNA12/CORO1C/PRKCE/PRR5L/ZEB2	13
celltypes.CD4 T cell.down	celltypes	CD4 T cell	down	BP	GO:0001841	neural tube formation	25/2018	93/14457	0.268817	1.92581	3.6076	0.000742999	0.00807814	0.00599966	STK4/MIB1/KIF20B/APAF1/OPA1/SKI/CASP3/PHACTR4/SCRIB/BRD2/WDR83/TRAF6/VASP/SETD2/IFT57/KDM2B/ABL1/HIF1A/TGFB1/LUZP1/LMO4/ARHGAP35/PTCH1/TCTN1/ST14	25
celltypes.CD4 T cell.down	celltypes	CD4 T cell	down	BP	GO:0098761	cellular response to interleukin-7	9/2018	20/14457	0.45	3.22381	4.00836	0.000773501	0.00829742	0.00616253	ATP5F1B/JAK1/P4HB/IL2RG/CRKL/STIP1/RAD23B/LSP1/BTK	9
celltypes.CD4 T cell.down	celltypes	CD4 T cell	down	BP	GO:2000786	positive regulation of autophagosome assembly	9/2018	20/14457	0.45	3.22381	4.00836	0.000773501	0.00829742	0.00616253	RAB3GAP2/WDR45/ATG2A/PIP4K2A/SNX30/SH3GLB1/WIPI1/RALB/SNX18	9
celltypes.CD4 T cell.down	celltypes	CD4 T cell	down	BP	GO:0002467	germinal center formation	7/2018	13/14457	0.538462	3.85755	4.15158	0.000809395	0.008568	0.00636348	RC3H1/NFKB2/ADAM17/BCL6/TNFAIP3/BCL3/MEF2C	7
celltypes.CD4 T cell.down	celltypes	CD4 T cell	down	BP	GO:0036344	platelet morphogenesis	10/2018	24/14457	0.416667	2.98501	3.91996	0.000828742	0.00870722	0.00646688	EP300/CIB1/WDR1/VPS33A/CASP3/MYH9/TPM4/PTPRJ/NBEAL2/MEF2C	10
celltypes.CD4 T cell.down	celltypes	CD4 T cell	down	BP	GO:0045732	positive regulation of protein catabolic process	45/2018	202/14457	0.222772	1.59595	3.43551	0.00083957	0.00880452	0.00653915	ELOB/GABARAP/APC/FBXW7/HECTD1/STUB1/NRDC/VCP/CSNK1D/CSNK2A1/HSP90AA1/AKT1/FMR1/GSK3B/TMX1/NUB1/HSPA1A/MDM2/NSF/SOCS4/DNAJB2/SOCS5/OAZ1/SIRT2/RNF41/OAZ2/BARD1/KEAP1/CBLB/NEDD4L/RDX/MSN/AXIN1/ITCH/TNFAIP3/FURIN/CD81/EZR/TNFRSF1B/ABCA2/LPCAT1/SMAD7/MYLIP/HERPUD1/ADAM8	45
celltypes.CD4 T cell.down	celltypes	CD4 T cell	down	BP	GO:0002090	regulation of receptor internalization	19/2018	64/14457	0.296875	2.12682	3.63882	0.00085284	0.0088939	0.00660553	PPP3R1/AP2M1/FMR1/RABEP1/ARF1/NUMB/MDM2/SCRIB/CBLB/ANKRD13A/AHI1/DTNBP1/TBC1D5/ANXA2/SYNE1/HIP1/CD63/PLCG2/SYK	19
celltypes.CD4 T cell.down	celltypes	CD4 T cell	down	BP	GO:0031122	cytoplasmic microtubule organization	19/2018	64/14457	0.296875	2.12682	3.63882	0.00085284	0.0088939	0.00660553	HOOK3/KPNB1/CIB1/PAFAH1B1/CLIP1/DLG1/RHOA/SLK/DYNC1H1/TBCB/CPAP/CCDC88B/TLN1/AXIN1/CHP1/CLASP1/CEP126/EZR/KIF21A	19
celltypes.CD4 T cell.down	celltypes	CD4 T cell	down	BP	GO:0034109	homotypic cell-cell adhesion	25/2018	94/14457	0.265957	1.90533	3.54681	0.000880346	0.00909637	0.0067559	JAK1/RAP2B/TMX1/FIBP/MYH9/FERMT3/TLN1/ILK/F11R/JAK2/RDX/CD9/SH2B3/CD99/PRKCD/VCL/FLNA/PIK3CG/CLIC1/CCL5/HBB/PLEK/LYN/DSP/SYK	25
celltypes.CD4 T cell.down	celltypes	CD4 T cell	down	BP	GO:1902806	regulation of cell cycle G1/S phase transition	39/2018	169/14457	0.230769	1.65324	3.44049	0.000894496	0.00922561	0.0068519	APC/PPP2CA/FBXW7/DLG1/SMARCD2/PAF1/DPF2/AKT1/INO80/SMARCE1/ARID1B/KMT2E/MDM2/PSME1/FBXO7/ADAM17/CPAP/APPL1/TCF3/PSME3/CDKN2D/BCL2/CTDSP1/LSM10/RDX/MNAT1/SMARCB1/RB1/ATP2B4/KLF11/BTN2A2/ANXA1/SLFN11/CDKN1A/PLCB1/RASSF1/ID2/BCL7A/PLCG2	39
celltypes.CD4 T cell.down	celltypes	CD4 T cell	down	BP	GO:2001057	reactive nitrogen species metabolic process	22/2018	79/14457	0.278481	1.99504	3.5719	0.000905322	0.00932017	0.00692213	RAC1/HSP90AA1/AKT1/NFATC3/PPARA/RORA/CYB5B/PRDX5/SELENOS/SMAD3/CYB5R3/ZC3H12A/JAK2/ASL/PTK2B/ATP2B4/TMEM106A/DDAH2/KLRK1/ACP5/HBB/CX3CR1	22
celltypes.CD4 T cell.down	celltypes	CD4 T cell	down	BP	GO:0070673	response to interleukin-18	6/2018	10/14457	0.6	4.29841	4.20251	0.000930515	0.00950986	0.00706301	AKT1/PIK3R1/CASP4/RIPK2/IL18R1/IL18RAP	6
celltypes.CD4 T cell.down	celltypes	CD4 T cell	down	BP	GO:0061025	membrane fusion	38/2018	164/14457	0.231707	1.65996	3.42348	0.000953596	0.00972807	0.00722507	VTI1B/USO1/HUWE1/BLOC1S6/CHMP4B/CHMP4A/RAB14/CHMP1B/RABEP1/VCPIP1/VPS33A/OPA1/PIKFYVE/VAMP8/STX8/RUFY1/RAB4B/NSF/VPS41/SAMD9/PIP4K2A/IRAG2/CHMP1A/RAB8A/VPS18/SLAMF1/SNAP23/SPG11/UVRAG/PLEKHM1/CD9/CHP1/ANXA1/ANXA2/SYT11/STX7/VAV3/RUBCNL	38
celltypes.CD4 T cell.down	celltypes	CD4 T cell	down	BP	GO:0071385	cellular response to glucocorticoid stimulus	15/2018	46/14457	0.326087	2.33609	3.65562	0.00101333	0.0102444	0.00760858	HNRNPU/ZFP36L2/UBE2L3/BMI1/ZFP36/NR3C1/FECH/USP8/FOXO3/CFLAR/JAK2/TGFB1/ZFP36L1/BCL2L11/ANXA1	15
celltypes.CD4 T cell.down	celltypes	CD4 T cell	down	BP	GO:1903729	regulation of plasma membrane organization	8/2018	17/14457	0.470588	3.37131	3.94022	0.00106508	0.0106717	0.00792592	DNM2/MYH9/SH3GLB1/CASP7/ANXA2/AHNAK/GSN/FASLG	8
celltypes.CD4 T cell.down	celltypes	CD4 T cell	down	BP	GO:0031507	heterochromatin formation	34/2018	143/14457	0.237762	1.70333	3.40441	0.00107352	0.0107104	0.00795468	HNRNPU/HNRNPK/LBR/XIST/ATF7IP/SPTY2D1/RESF1/MECP2/H3-3A/TASOR/ATRX/KMT2D/KDM5A/BAZ2A/BMI1/H3-3B/MBD2/LRIF1/SPEN/ARB2A/H2AC6/HMGB1/PPM1D/PCGF5/HDAC8/SIRT2/PCGF3/UBR2/EHMT1/BCL6/JARID2/RB1/CDYL/LMNA	34
celltypes.CD4 T cell.down	celltypes	CD4 T cell	down	BP	GO:0070527	platelet aggregation	20/2018	70/14457	0.285714	2.04686	3.53628	0.00107466	0.0107104	0.00795468	RAP2B/TMX1/FIBP/MYH9/FERMT3/TLN1/ILK/F11R/JAK2/CD9/SH2B3/PRKCD/VCL/FLNA/PIK3CG/CLIC1/HBB/PLEK/LYN/SYK	20
celltypes.CD4 T cell.down	celltypes	CD4 T cell	down	BP	GO:0046718	symbiont entry into host cell	30/2018	122/14457	0.245902	1.76165	3.40272	0.00116277	0.0114612	0.00851226	P4HB/LAMP1/GRK2/PIKFYVE/VAMP8/HSPA1A/WWP2/HMGB1/MYH9/BSG/VPS18/SLAMF1/TRIM38/F11R/TFRC/UVRAG/ITCH/LGALS1/SLC1A5/EPS15/ITGB1/FURIN/CD81/PLSCR1/CXCR4/NPC1/CD74/CCR5/NCAM1/HLA-DRB1	30
celltypes.CD4 T cell.down	celltypes	CD4 T cell	down	BP	GO:0030970	retrograde protein transport, ER to cytosol	11/2018	29/14457	0.37931	2.71739	3.72869	0.00116834	0.0114612	0.00851226	OS9/AUP1/SEL1L/VCP/SEC61B/EDEM2/SELENOS/SYVN1/DERL1/UBE2J1/HERPUD1	11
celltypes.CD4 T cell.down	celltypes	CD4 T cell	down	BP	GO:0071404	cellular response to low-density lipoprotein particle stimulus	11/2018	29/14457	0.37931	2.71739	3.72869	0.00116834	0.0114612	0.00851226	AKT1/TXNIP/SOCS5/MYD88/CD9/TGFB1/ITGB1/CD81/NPC1/FCER1G/SYK	11
celltypes.CD4 T cell.down	celltypes	CD4 T cell	down	BP	GO:0080135	regulation of cellular response to stress	94/2018	498/14457	0.188755	1.35225	3.22199	0.00117324	0.0114692	0.0085182	HNRNPK/PARK7/BRD4/MAPKAP1/TMBIM6/FBXW7/STUB1/TAOK3/TAF7/PPP4R3A/EP300/CSNK2A1/SMARCD2/CREBBP/DEK/RAD9A/DPF2/CDK9/AKT1/MAP2K1/DNAJA1/GSK3B/TMX1/ACTR2/ATF6B/INO80/OPA1/NSD2/SMARCE1/TAF12/VHL/KAT5/PPP1R15A/PIK3R1/NBN/POLH/HSPA1A/ARID1B/BRAF/PTPN1/MDM2/TFIP11/MAP2K2/WAS/HAPSTR1/TAOK2/HMGB1/ZMPSTE24/PARP1/DNAJB6/RNF169/CCDC117/SIRT7/SLF1/SELENOS/SETD2/PNPLA8/AKT3/SPRING1/TADA3/CDKN2D/EIF2AK2/KAT2B/GRN…	94
celltypes.CD4 T cell.down	celltypes	CD4 T cell	down	BP	GO:0006925	inflammatory cell apoptotic process	9/2018	21/14457	0.428571	3.0703	3.82394	0.00118711	0.0115645	0.00858903	ZMPSTE24/SELENOS/ST6GAL1/ANXA1/PLEKHO2/CCL5/CCR5/FASLG/MEF2C	9
celltypes.CD4 T cell.down	celltypes	CD4 T cell	down	BP	GO:0042542	response to hydrogen peroxide	24/2018	91/14457	0.263736	1.88941	3.42806	0.0012547	0.0121389	0.00901559	PARK7/MT-ND5/RIPK1/STAT6/MT-ND6/CASP3/MDM2/SETX/CAT/TXNIP/BCL2/ABL1/RIPK3/ERN1/PRKCD/PTK2B/CAPN2/MAP3K5/TNFAIP3/RHOB/HBA1/HBB/HBA2/IL18RAP	24
celltypes.CD4 T cell.down	celltypes	CD4 T cell	down	BP	GO:0071375	cellular response to peptide hormone stimulus	64/2018	317/14457	0.201893	1.44636	3.23658	0.00128841	0.0124435	0.00924185	JAK1/USO1/MAPKAP1/APC/PTPRA/GNAI2/UCP2/ZNF106/CSK/ADIPOR1/PDPK1/SYAP1/STAT6/EIF4EBP2/AKT1/GSK3B/CUL3/PIK3R1/SHOC2/ARID1B/PTPN1/MDM2/SOS1/HDAC5/ROCK1/SNX5/GRB2/PARP1/APPL1/NCOA1/SELENOS/PIP4K2A/SOS2/WDTC1/KAT2B/RAB8A/NCOA2/ZDHHC7/CTSD/SIK2/FOXO4/CFLAR/JAK2/TGFB1/MYO5A/ZFP36L1/PTPRJ/PRKCD/RB1/ATP2B1/PRKCB/EPHA4/PRKAR1A/MAPK1/PPP3CA/PTPRE/NR4A2/RHOQ/PLCB1/FOS/KIT/NR4A1/RAB31/LYN	64
celltypes.CD4 T cell.down	celltypes	CD4 T cell	down	BP	GO:0051283	negative regulation of sequestering of calcium ion	27/2018	107/14457	0.252336	1.80774	3.37778	0.00133041	0.0127615	0.00947803	CALM2/GHITM/DIAPH1/PDPK1/PDE4D/ITPR2/HTT/CAMK2D/ANXA6/ABL1/TGFB1/PTK2B/TMEM38A/ITPR1/FLNA/CYBA/PLCB1/PRKCE/CXCR3/F2R/CCR5/FASLG/PLCG2/CD19/XCL1/LYN/DMD	27
celltypes.CD4 T cell.down	celltypes	CD4 T cell	down	BP	GO:0051402	neuron apoptotic process	57/2018	276/14457	0.206522	1.47953	3.23971	0.00133749	0.0128075	0.00951218	PARK7/TMBIM6/FBXW7/XIAP/GAPDH/EGLN1/MECP2/UCP2/RIPK1/DNAJC5/CTNNB1/APAF1/GSK3B/RHOA/CASP3/BRAF/HTRA2/BTG2/UBE2M/ROCK1/NR3C1/FBXO7/PRNP/LIG4/PARP1/GCLM/CPEB4/FOXO3/GRN/CASP4/KDM2B/BCL2/SRPK2/SPG11/CFLAR/UBB/ABL1/HIF1A/JAK2/NF1/TGFB1/PTK2B/CASP7/BCL2L11/RB1/G6PD/EPHA4/MAP3K5/NR4A2/PLXND1/ADAM8/ITGA1/F2R/EGR1/FASLG/CX3CR1/MEF2C	57
celltypes.CD4 T cell.down	celltypes	CD4 T cell	down	BP	GO:0150115	cell-substrate junction organization	26/2018	102/14457	0.254902	1.82612	3.37237	0.00138309	0.0131616	0.00977516	PTPRA/RAC1/RAB8B/RHOA/SLK/PIK3R1/DAPK3/ROCK1/TAOK2/MAPRE2/SMAD3/TLN1/ARF6/BCL2/MACF1/BCR/ABL1/PEAK1/DUSP22/PTPRJ/IQSEC1/PTK2B/VCL/CLASP1/CORO1C/PHLDB2	26
celltypes.CD4 T cell.down	celltypes	CD4 T cell	down	BP	GO:0006816	calcium ion transport	72/2018	366/14457	0.196721	1.40932	3.19463	0.00139544	0.0132496	0.00984055	CALM2/TMBIM6/GHITM/PPP3R1/SELENOK/MICU2/GNAI2/DIAPH1/UCP2/CTNNB1/PDPK1/PDE4D/FMR1/TMCO1/TMX1/ITPR2/HTT/VDAC1/PRNP/ZMPSTE24/TRPV2/CAMK2D/GNB5/STIM2/ANXA6/TMEM165/LGALS3/CD84/SLC30A1/BCL2/SPG11/ABL1/TGFB1/PTK2B/TMEM38A/ITPR1/ATP2B4/ATP2B1/PRKCB/G6PD/PDE4B/PPP3CA/ORAI3/ATP2A3/FLNA/CYBA/CALHM2/PIK3CG/PLCB1/SESTD1/CXCR4/AHNAK/PRKCE/P2RX5/ORAI2/RGS9/CXCR3/FCRL3/CCL5/F2R/CCR5/FASLG/PLCG2/CD19/AKAP5/CCL4…	72
celltypes.CD4 T cell.down	celltypes	CD4 T cell	down	BP	GO:0009179	purine ribonucleoside diphosphate metabolic process	28/2018	113/14457	0.247788	1.77516	3.33185	0.0014743	0.0137301	0.0101974	PPP2CA/GAPDH/UCP2/EP300/DLG1/ADPGK/ZBTB20/TPI1/LDHA/GUK1/LIPA/PPARA/ARNT/PGAM1/OGDH/NCOR1/PFKL/EIF6/ZBTB7A/PFKP/NT5E/KAT2B/PRXL2C/CARD11/PFKFB2/HIF1A/AK1/DHTKD1	28
celltypes.CD4 T cell.down	celltypes	CD4 T cell	down	BP	GO:0051293	establishment of spindle localization	17/2018	57/14457	0.298246	2.13664	3.46314	0.00148268	0.0137301	0.0101974	CFL1/KPNB1/PAFAH1B1/DYNC1H1/MCPH1/KAT5/CDK5RAP2/HTT/DCTN1/FBXW11/MYH9/MAP4/INPPL1/GPSM2/CLASP1/LLGL2/ITGB1	17
celltypes.CD4 T cell.down	celltypes	CD4 T cell	down	BP	GO:1900024	regulation of substrate adhesion-dependent cell spreading	17/2018	57/14457	0.298246	2.13664	3.46314	0.00148268	0.0137301	0.0101974	P4HB/CIB1/RAC1/ARPC2/WASHC2C/CRKL/BRAF/TRIOBP/ILK/ST6GAL1/ABL1/NEDD9/TESK1/FLNA/PREX1/CORO1C/ACTN4	17
celltypes.CD4 T cell.down	celltypes	CD4 T cell	down	BP	GO:0043303	mast cell degranulation	14/2018	43/14457	0.325581	2.33247	3.52446	0.00150332	0.0138983	0.0103223	PDPK1/VAMP8/STXBP2/CD84/SNAP23/IL4R/PIK3CG/KIT/CD300A/PTGDR/LAT2/BTK/LYN/SYK	14
celltypes.CD4 T cell.down	celltypes	CD4 T cell	down	BP	GO:0009154	purine ribonucleotide catabolic process	30/2018	124/14457	0.241935	1.73323	3.30275	0.00153245	0.0140646	0.0104458	PPP2CA/GAPDH/UCP2/EP300/NUDT3/ADPGK/ZBTB20/TPI1/LDHA/NT5C2/PDE4D/LIPA/PPARA/ARNT/PGAM1/OGDH/NCOR1/PFKL/EIF6/ZBTB7A/PFKP/NT5E/KAT2B/PRXL2C/PFKFB2/HIF1A/DHTKD1/NT5C/PDE4B/PDE4A	30
celltypes.CD4 T cell.down	celltypes	CD4 T cell	down	BP	GO:1904019	epithelial cell apoptotic process	19/2018	67/14457	0.283582	2.03159	3.40883	0.00156234	0.0142123	0.0105555	STK4/EXOC5/PPARA/ZFP36/TMF1/CASP3/ARF6/BCL2/CFLAR/ABL1/JAK2/ZFP36L1/CAST/RB1/ANXA2/PIK3CG/SAV1/NPC1/GSN	19
celltypes.CD4 T cell.down	celltypes	CD4 T cell	down	BP	GO:0043161	proteasome-mediated ubiquitin-dependent protein catabolic process	82/2018	429/14457	0.191142	1.36935	3.12793	0.00162546	0.0146422	0.0108748	KLHL24/PSMB1/ELOB/GABARAP/PARK7/USP7/TBL1XR1/PSMD2/APC/FBXW7/HUWE1/HECTD1/PSMB8/UBE2H/STUB1/XPO1/VCP/CSNK1D/ARIH2/PSMA4/CSNK2A1/UBR1/PSMB3/UBR4/CTNNB1/USP9X/AKT1/CDC27/PJA2/GSK3B/FBXW5/RBCK1/UBXN7/SH3BGRL/PSMB2/CUL3/VHL/KAT5/NUB1/HSPA1A/SMURF2/PSMD14/MDM2/KLHL5/WWP2/ADRM1/FBXO7/UBE2W/FBXW11/SOCS4/KCTD5/DNAJB2/KCTD17/PSMB10/ZSWIM8/PPP2R5C/SOCS5/SIRT2/SIAH2/UBR2/RAD23B/SYVN1/TRIM38/KEAP1/TRIM26/DER…	82
celltypes.CD4 T cell.down	celltypes	CD4 T cell	down	BP	GO:0000422	autophagy of mitochondrion	28/2018	114/14457	0.245614	1.75958	3.27945	0.00169924	0.0150653	0.0111891	GABARAP/PARK7/FBXW7/HUWE1/STUB1/ATG4B/ATG12/RB1CC1/OPTN/VPS13C/MFN2/HTRA2/HTT/WDR45/VDAC1/FBXO7/ATG2A/RNF41/SNX30/SQSTM1/MAP1LC3B/HIF1A/UBE2A/ATG4D/WIPI1/SLC25A4/ARHGAP26/GABARAPL1	28
celltypes.CD4 T cell.down	celltypes	CD4 T cell	down	BP	GO:0032878	regulation of establishment or maintenance of cell polarity	10/2018	26/14457	0.384615	2.75539	3.60832	0.00172265	0.0152274	0.0113095	KIF20B/RAP1B/DOCK8/ROCK1/CYRIB/ABL1/RUFY3/LLGL2/PLEKHG3/GSN	10
celltypes.CD4 T cell.down	celltypes	CD4 T cell	down	BP	GO:0007520	myoblast fusion	13/2018	39/14457	0.333333	2.38801	3.49594	0.00172565	0.0152274	0.0113095	CD53/MYH9/DOCK2/EHD1/CFLAR/CD9/IL4R/NEO1/NFATC2/CAPN2/ITGB1/CD81/TNFSF14	13
celltypes.CD4 T cell.down	celltypes	CD4 T cell	down	BP	GO:0046328	regulation of JNK cascade	30/2018	125/14457	0.24	1.71937	3.25344	0.00175265	0.0154173	0.0114505	XIAP/TAOK3/RB1CC1/PAFAH1B1/RIPK1/DNAJA1/PJA2/ZMYND11/HIPK3/NCOR1/RNF13/TAOK2/HMGB1/MYD88/SLAMF1/GADD45B/DVL3/RAP2A/DUSP22/AXIN1/ITCH/RASSF2/PTK2B/GSTP1/MAP3K5/RIPK2/TRAF4/PLCB1/PTPN22/DUSP10	30
celltypes.CD4 T cell.down	celltypes	CD4 T cell	down	BP	GO:0006401	RNA catabolic process	60/2018	297/14457	0.20202	1.44728	3.13701	0.00176489	0.0155007	0.0115124	HNRNPU/TRIR/HNRNPA0/ELOB/NEAT1/XIST/XRN1/SMG1/ZCCHC17/THRAP3/RNPS1/ZFP36L2/ZC3H18/RC3H2/ALKBH5/ELAVL1/CARHSP1/LSM7/RC3H1/RBM38/RBM8A/FAM76B/UPF2/DICER1/AKT1/FMR1/ZCCHC7/QKI/SAMD4B/ZFP36/HSPA1A/GTPBP1/BTG2/ROCK1/MEX3D/PCID2/EIF4ENIF1/ZSWIM8/ISG20/MYD88/NUDT16/TUT7/ZHX2/EXOSC4/ZC3H12A/ERN1/TESK1/MAPKAPK2/ZFP36L1/PRKCD/SIDT2/CTIF/AGO4/PATL2/TNFRSF1B/TENT5A/YBX3/TENT5C/SLFN13/PRR5L	60
celltypes.CD4 T cell.down	celltypes	CD4 T cell	down	BP	GO:2000045	regulation of G1/S transition of mitotic cell cycle	34/2018	147/14457	0.231293	1.65699	3.22468	0.00177263	0.0155202	0.0115269	APC/PPP2CA/DLG1/SMARCD2/DPF2/AKT1/INO80/SMARCE1/ARID1B/KMT2E/MDM2/PSME1/FBXO7/ADAM17/CPAP/APPL1/TCF3/PSME3/CDKN2D/BCL2/CTDSP1/LSM10/RDX/MNAT1/SMARCB1/RB1/KLF11/BTN2A2/ANXA1/SLFN11/CDKN1A/PLCB1/ID2/BCL7A	34
celltypes.CD4 T cell.down	celltypes	CD4 T cell	down	BP	GO:0006873	intracellular monoatomic ion homeostasis	85/2018	449/14457	0.18931	1.35622	3.08847	0.00180465	0.0156628	0.0116328	ATP6V0E1/CALM2/ATP5F1B/TMBIM6/GHITM/TMC6/SELENOK/MICU2/DIAPH1/FTH1/LAMP1/EGLN1/ATP6AP1/PDPK1/PDE4D/TMCO1/VPS33A/ARF1/CLCN3/ATP6V1D/AP3B1/ITPR2/NPTN/TTC7A/VMA22/HTT/PRNP/CAMK2D/KCTD17/PDZD8/STIM2/ATP1B3/ATP6V0C/ANXA6/SLC39A7/ATP6V0B/TMEM165/RMDN3/SLC30A1/GRN/SLC12A2/BCL2/ABL1/TFRC/HIF1A/TGFB1/DMXL1/NEO1/CHP1/STK39/CYB561A3/ATP6V0D1/PTK2B/TMEM38A/ITPR1/ATP2B4/ATP2B1/PRKCB/PICALM/CYB561/TCIRG1/ATP6V…	85
celltypes.CD4 T cell.down	celltypes	CD4 T cell	down	BP	GO:0061723	glycophagy	6/2018	11/14457	0.545455	3.90765	3.88559	0.00180563	0.0156628	0.0116328	ATG12/RB1CC1/WDR45/ATG2A/WIPI1/GABARAPL1	6
celltypes.CD4 T cell.down	celltypes	CD4 T cell	down	BP	GO:0072594	establishment of protein localization to organelle	83/2018	437/14457	0.189931	1.36067	3.0837	0.00184353	0.015869	0.011786	STK4/USP7/FBXW7/HUWE1/PPP3R1/AP3D1/NIPBL/NPEPPS/MAVS/KPNB1/ARIH2/LAMP1/ELAVL1/EP300/CHMP4B/VPS13C/KPNA1/CHMP4A/LAPTM5/NUP88/KPNA4/M6PR/SEC61B/VPS36/UBE2L3/HSP90AA1/RBM22/USP9X/MFN2/AKT1/MON1B/RAB8B/NFATC3/DNAJA1/RAB3GAP2/SPCS2/AP3B1/GOLPH3/PIK3R1/MTCH2/HTRA2/HSPA4/FBXO7/ZFAND6/TSG101/EIF4ENIF1/VPS41/TXNIP/STAM2/ZFYVE16/APPL1/ZNF827/SMAD3/SH3GLB1/SQSTM1/CBLB/SPG11/ZC3H12A/KPNA2/NABP2/GNPTAB/JAK2/N…	83
celltypes.CD4 T cell.down	celltypes	CD4 T cell	down	BP	GO:2000177	regulation of neural precursor cell proliferation	21/2018	78/14457	0.269231	1.92878	3.31273	0.00186521	0.0160066	0.0118882	GNAI2/CTNNB1/RHOA/SHOC2/BTG2/SIRT2/FOXO3/ZNF335/KDM2B/ILK/HIF1A/NF1/TGFB1/ITGB1/FLNA/TOX/ID2/CTNNA1/CX3CR1/ADGRG1/LYN	21
celltypes.CD4 T cell.down	celltypes	CD4 T cell	down	BP	GO:0052547	regulation of peptidase activity	18/2018	63/14457	0.285714	2.04686	3.35399	0.001872	0.0160404	0.0119132	PSMB8/NRDC/VCP/GAPDH/SERPINB1/SERPINB9/AKT1/SERPINB6/PRELID1/GRN/TANK/MBP/EPHA4/FURIN/SERPINI1/CTSH/CST7/LYN	18
celltypes.CD4 T cell.down	celltypes	CD4 T cell	down	BP	GO:0042742	defense response to bacterium	44/2018	204/14457	0.215686	1.54518	3.1586	0.00188261	0.0160813	0.0119436	XIAP/OPTN/MAVS/HLA-A/TUSC2/RAB14/RBCK1/GSDMD/RNF213/TMF1/RBPJ/ADAM17/MR1/MYD88/NAGK/GBP3/SLC30A1/GRN/CASP4/SPN/GBP4/AKIRIN2/H2BC12/PRKCD/CASP1/CASP7/OAS1/RIPK2/NOTCH2/CYBA/KLRK1/GBP5/BCL3/SYT11/TFEB/ACP5/LYST/TBK1/FCER1G/GNLY/JCHAIN/IRF8/SYK/MPEG1	44
celltypes.CD4 T cell.down	celltypes	CD4 T cell	down	BP	GO:0071402	cellular response to lipoprotein particle stimulus	12/2018	35/14457	0.342857	2.45624	3.47412	0.00195923	0.0166106	0.0123367	AKT1/ADAM17/TXNIP/SOCS5/MYD88/CD9/TGFB1/ITGB1/CD81/NPC1/FCER1G/SYK	12
celltypes.CD4 T cell.down	celltypes	CD4 T cell	down	BP	GO:0016579	protein deubiquitination	24/2018	94/14457	0.255319	1.82911	3.24823	0.00202452	0.0170868	0.0126905	PARK7/USP7/USP48/VCP/USP34/JOSD1/USP9X/VCPIP1/ABRAXAS2/USP11/USP24/PSMD14/OTULIN/DNAJB2/USP12/USP8/TNIP1/OTUD7B/TANK/ZC3H12A/SHMT2/ITCH/TNFAIP3/USP28	24
celltypes.CD4 T cell.down	celltypes	CD4 T cell	down	BP	GO:0010586	miRNA metabolic process	25/2018	100/14457	0.25	1.79101	3.19698	0.00225913	0.0188127	0.0139723	ELOB/NEAT1/XIST/RC3H2/RC3H1/DICER1/NFATC3/POU2F1/PPARA/QKI/NCOR1/NR3C1/ZSWIM8/SMAD3/FOXO3/TUT7/ZC3H12A/HIF1A/TGFB1/BMPR1A/AGO4/JUN/NOTCH2/FOS/EGR1	25
celltypes.CD4 T cell.down	celltypes	CD4 T cell	down	BP	GO:0001573	ganglioside metabolic process	10/2018	27/14457	0.37037	2.65334	3.46341	0.00239771	0.0196466	0.0145916	HEXA/NEU1/ST3GAL2/ST3GAL5/ST8SIA4/ST6GALNAC6/B4GALT5/ABCA2/GM2A/ST8SIA6	10
celltypes.CD4 T cell.down	celltypes	CD4 T cell	down	BP	GO:0001778	plasma membrane repair	10/2018	27/14457	0.37037	2.65334	3.46341	0.00239771	0.0196466	0.0145916	CHMP4B/CHMP4A/VPS4B/CHMP1B/MYH9/CHMP1A/CASP7/ANXA2/SYT11/AHNAK	10
celltypes.CD4 T cell.down	celltypes	CD4 T cell	down	BP	GO:0060544	regulation of necroptotic process	10/2018	27/14457	0.37037	2.65334	3.46341	0.00239771	0.0196466	0.0145916	RIPK1/RBCK1/BIRC3/PARP1/CFLAR/RIPK3/ITCH/SLC25A4/YBX3/ZBP1	10
celltypes.CD4 T cell.down	celltypes	CD4 T cell	down	BP	GO:0030307	positive regulation of cell growth	34/2018	150/14457	0.226667	1.62385	3.09343	0.00252865	0.0205453	0.0152591	EIF4G2/MAPKAP1/ITSN2/MECP2/CSNK2A1/CIB1/PAFAH1B1/H3-3A/AKT1/GOLGA4/INO80/ADAM10/H3-3B/ADAM17/TRPV2/PRR5/RPS6KA1/ACSL4/EXOSC4/MEGF8/KDM2B/BCL2/MACF1/NEDD4L/EXTL3/PTK2B/RUFY3/MTPN/TGFBR1/LIMK1/CD38/SMAD7/CXCR4/BCL11A	34
celltypes.CD4 T cell.down	celltypes	CD4 T cell	down	BP	GO:0009791	post-embryonic development	22/2018	85/14457	0.258824	1.85422	3.18135	0.00253753	0.0205453	0.0152591	ASH1L/RC3H2/MECP2/ATRX/ACADM/IGF2R/BPNT2/BCL2/ABL1/JAK2/CSRNP1/ASL/INPPL1/SGPL1/HEG1/BCL2L11/ITPR1/CHST11/TGFBR1/ARID5B/NR4A2/PRDM1	22
celltypes.CD4 T cell.down	celltypes	CD4 T cell	down	BP	GO:0035902	response to immobilization stress	8/2018	19/14457	0.421053	3.01643	3.54241	0.00255597	0.0205538	0.0152654	MDM2/FOXO3/FOXO4/GLTP/TGFB1/PTK2B/PPP1R9B/FOS	8
celltypes.CD4 T cell.down	celltypes	CD4 T cell	down	BP	GO:0070269	pyroptotic inflammatory response	12/2018	36/14457	0.333333	2.38801	3.35844	0.00257091	0.020615	0.0153108	GSDMD/CASP3/DPP9/GBP3/CASP4/CASP1/GBP5/MAP3K20/ZBP1/ZEB2/GZMA/GZMB	12
celltypes.CD4 T cell.down	celltypes	CD4 T cell	down	BP	GO:0043534	blood vessel endothelial cell migration	27/2018	112/14457	0.241071	1.72704	3.11107	0.00270762	0.021588	0.0160335	ATP5F1B/FBXW7/MECP2/CIB1/PDPK1/AKT1/RHOA/HDAC5/HMGB1/ADAM17/MYH9/AKT3/PRCP/ABL1/HIF1A/NF1/TGFB1/MAP2K3/PTK2B/ATP2B4/ANXA1/ITGB1/VASH1/TGFBR3/NR4A1/CD40/MEF2C	27
celltypes.CD4 T cell.down	celltypes	CD4 T cell	down	BP	GO:0006885	regulation of pH	24/2018	96/14457	0.25	1.79101	3.13195	0.00273604	0.0217101	0.0161242	ATP6V0E1/ATP5F1B/LAMP1/ATP6AP1/VPS33A/CLCN3/ATP6V1D/VMA22/ATP6V0C/ATP6V0B/TMEM165/GRN/BCL2/DMXL1/CHP1/ATP6V0D1/TCIRG1/ATP6V1A/MAPK1/LACC1/SLC9A7/HVCN1/CLIC4/FASLG	24
celltypes.CD4 T cell.down	celltypes	CD4 T cell	down	BP	GO:0021762	substantia nigra development	13/2018	41/14457	0.317073	2.27152	3.28386	0.00286059	0.022647	0.01682	CALM2/MAPKAP1/LDHA/RHOA/SIRT2/SUDS3/DYNLL1/MBP/YWHAQ/G6PD/YWHAH/GNB4/BASP1	13
celltypes.CD4 T cell.down	celltypes	CD4 T cell	down	BP	GO:0071763	nuclear membrane organization	14/2018	46/14457	0.304348	2.18036	3.22951	0.00306727	0.0238797	0.0177355	CTDNEP1/UBE2I/CHMP4B/PAFAH1B1/CHMP4A/EMD/VPS4B/CHMP1B/DCTN1/BROX/SIRT2/CHMP1A/TMEM43/PRKCB	14
celltypes.CD4 T cell.down	celltypes	CD4 T cell	down	BP	GO:0045927	positive regulation of growth	46/2018	221/14457	0.208145	1.49115	2.96355	0.0031563	0.0243696	0.0180994	EIF4G2/MAPKAP1/NIPBL/ITSN2/MECP2/CSNK2A1/CIB1/PAFAH1B1/H3-3A/AKT1/GOLGA4/INO80/ADAM10/H3-3B/RBPJ/ADAM17/TRPV2/PRR5/RPS6KA1/ACSL4/EXOSC4/MEGF8/KDM2B/BCL2/MACF1/NEDD4L/SASH3/EXTL3/BMPR1A/PTK2B/RFTN1/RUFY3/MTPN/TGFBR1/EZR/LIMK1/CD38/SMAD7/PLCB1/CXCR4/YBX3/BCL11A/TGFBR3/HOPX/MEF2C/BASP1	46
celltypes.CD4 T cell.down	celltypes	CD4 T cell	down	BP	GO:0046849	bone remodeling	20/2018	76/14457	0.263158	1.88527	3.11659	0.00316404	0.0243696	0.0180994	CSK/CTNNB1/TPP1/TRAF6/TFRC/PLEKHM1/NF1/DEF8/RASSF2/PTK2B/TCIRG1/TNFAIP3/NOTCH2/CD38/INPP5D/ACP5/SNX10/ADAM8/ADRB2/SYK	20
celltypes.CD4 T cell.down	celltypes	CD4 T cell	down	BP	GO:0001768	establishment of T cell polarity	6/2018	12/14457	0.5	3.58201	3.60398	0.00318656	0.0243696	0.0180994	DOCK8/SCRIB/MYH9/DOCK2/ABL1/GSN	6
celltypes.CD4 T cell.down	celltypes	CD4 T cell	down	BP	GO:0001921	positive regulation of receptor recycling	6/2018	12/14457	0.5	3.58201	3.60398	0.00318656	0.0243696	0.0180994	RAB29/ARAP1/SCRIB/NSF/EPS15/ANXA2	6
celltypes.CD4 T cell.down	celltypes	CD4 T cell	down	BP	GO:0071888	macrophage apoptotic process	6/2018	12/14457	0.5	3.58201	3.60398	0.00318656	0.0243696	0.0180994	SELENOS/ST6GAL1/PLEKHO2/CCL5/CCR5/MEF2C	6
celltypes.CD4 T cell.down	celltypes	CD4 T cell	down	BP	GO:0010611	regulation of cardiac muscle hypertrophy	15/2018	51/14457	0.294118	2.10707	3.18991	0.00320175	0.0244525	0.018161	STUB1/NFATC3/PPARA/ROCK1/PARP1/CAMK2D/SMAD3/JARID2/ATP2B4/MTPN/G6PD/PPP3CA/TNFRSF1B/LMNA/RGS2	15
celltypes.CD4 T cell.down	celltypes	CD4 T cell	down	BP	GO:0007097	nuclear migration	10/2018	28/14457	0.357143	2.55858	3.32493	0.00326939	0.0248341	0.0184444	SUN2/HOOK3/PAFAH1B1/DYNC1H1/DCTN1/FBXW11/SYNE2/TACC1/NHERF1/LMNA	10
celltypes.CD4 T cell.down	celltypes	CD4 T cell	down	BP	GO:1902850	microtubule cytoskeleton organization involved in mitosis	36/2018	164/14457	0.219512	1.57259	2.97027	0.00341498	0.0258005	0.0191622	HNRNPU/SMC3/SUN2/VCP/KPNB1/CLTC/GOLGA2/CHMP4B/PAFAH1B1/CHMP4A/VPS4B/CHMP1B/RHOA/DYNC1H1/ABRAXAS2/MCPH1/KAT5/HSPA1A/CDK5RAP2/CEP192/KIF3B/HTT/DCTN1/FBXW11/CPAP/SETD2/CHMP1A/TACC1/MAP4/ILK/INPPL1/GPSM2/CLASP1/CEP126/ITGB1/FLNA	36
celltypes.CD4 T cell.down	celltypes	CD4 T cell	down	BP	GO:1904035	regulation of epithelial cell apoptotic process	13/2018	42/14457	0.309524	2.21744	3.1824	0.0036225	0.0270054	0.020057	STK4/PPARA/ZFP36/TMF1/BCL2/CFLAR/JAK2/ZFP36L1/CAST/RB1/SAV1/NPC1/GSN	13
celltypes.CD4 T cell.down	celltypes	CD4 T cell	down	BP	GO:0033238	regulation of amine metabolic process	7/2018	16/14457	0.4375	3.13426	3.44033	0.0036796	0.0272503	0.0202389	PARK7/ABAT/PAOX/ATP2B4/NR4A2/ALDH2/ITGAM	7
celltypes.CD4 T cell.down	celltypes	CD4 T cell	down	BP	GO:0051014	actin filament severing	7/2018	16/14457	0.4375	3.13426	3.44033	0.0036796	0.0272503	0.0202389	CFL1/DSTN/SRGAP2/MYH9/FMNL1/CAPG/GSN	7
celltypes.CD4 T cell.down	celltypes	CD4 T cell	down	BP	GO:0019377	glycolipid catabolic process	8/2018	20/14457	0.4	2.86561	3.36271	0.00374428	0.0276202	0.0205136	M6PR/HEXA/NEU1/SUMF1/PRKCD/FUCA1/GBA2/GM2A	8
celltypes.CD4 T cell.down	celltypes	CD4 T cell	down	BP	GO:0003158	endothelium development	28/2018	120/14457	0.233333	1.67161	2.97555	0.00376621	0.0277456	0.0206067	BLOC1S6/RAP1B/CTNNB1/PDE4D/LIPA/RHOA/VEZF1/BTG1/ROCK1/RBPJ/ADD1/MYD88/BSG/F11R/RAP2C/RDX/AFDN/MSN/RAPGEF2/VCL/HEG1/RAPGEF1/EZR/PPP1R16B/PLCB1/CXCR4/RHOB/CLIC4	28
celltypes.CD4 T cell.down	celltypes	CD4 T cell	down	BP	GO:0006096	glycolytic process	23/2018	93/14457	0.247312	1.77175	3.00726	0.00383573	0.0280358	0.0208223	PPP2CA/GAPDH/UCP2/EP300/ADPGK/ZBTB20/TPI1/LDHA/LIPA/PPARA/ARNT/PGAM1/OGDH/NCOR1/PFKL/EIF6/ZBTB7A/PFKP/KAT2B/PRXL2C/PFKFB2/HIF1A/DHTKD1	23
celltypes.CD4 T cell.down	celltypes	CD4 T cell	down	BP	GO:0051647	nucleus localization	11/2018	33/14457	0.333333	2.38801	3.21513	0.00384052	0.0280358	0.0208223	SUN2/HOOK3/PAFAH1B1/CDK9/DYNC1H1/DCTN1/FBXW11/SYNE2/TACC1/NHERF1/LMNA	11
celltypes.CD4 T cell.down	celltypes	CD4 T cell	down	BP	GO:0098884	postsynaptic neurotransmitter receptor internalization	11/2018	33/14457	0.333333	2.38801	3.21513	0.00384052	0.0280358	0.0208223	PPP3R1/AP2M1/AP2B1/RABEP1/NUMB/MDM2/SCRIB/CBLB/EPS15/SYNE1/HIP1	11
celltypes.CD4 T cell.down	celltypes	CD4 T cell	down	BP	GO:0014743	regulation of muscle hypertrophy	15/2018	52/14457	0.288462	2.06655	3.10325	0.00392998	0.0285736	0.0212217	STUB1/NFATC3/PPARA/ROCK1/PARP1/CAMK2D/SMAD3/JARID2/ATP2B4/MTPN/G6PD/PPP3CA/TNFRSF1B/LMNA/RGS2	15
celltypes.CD4 T cell.down	celltypes	CD4 T cell	down	BP	GO:0051893	regulation of focal adhesion assembly	17/2018	62/14457	0.274194	1.96433	3.06484	0.00396662	0.0285736	0.0212217	PTPRA/RAC1/RHOA/SLK/DAPK3/ROCK1/SMAD3/TLN1/MACF1/ABL1/PEAK1/DUSP22/PTPRJ/VCL/CLASP1/CORO1C/PHLDB2	17
celltypes.CD4 T cell.down	celltypes	CD4 T cell	down	BP	GO:0045005	DNA-templated DNA replication maintenance of fidelity	16/2018	57/14457	0.280702	2.01095	3.0802	0.00397519	0.0285736	0.0212217	RECQL/POLG/ATRX/CDK9/BOD1L1/NBN/MCM8/FAM111A/PARP1/BARD1/DYNLL1/BLM/SLFN11/TIMELESS/RBBP8/GEN1	16
celltypes.CD4 T cell.down	celltypes	CD4 T cell	down	BP	GO:0048857	neural nucleus development	16/2018	57/14457	0.280702	2.01095	3.0802	0.00397519	0.0285736	0.0212217	CALM2/MAPKAP1/MECP2/LDHA/RHOA/SCRIB/SIRT2/SUDS3/BCL2/DYNLL1/MBP/YWHAQ/G6PD/YWHAH/GNB4/BASP1	16
celltypes.CD4 T cell.down	celltypes	CD4 T cell	down	BP	GO:0097306	cellular response to alcohol	22/2018	88/14457	0.25	1.79101	2.99778	0.00402034	0.0287877	0.0213807	XRN1/CTNNB1/AKT1/GNB1/GOLPH3/ITPR2/MDM2/BTG2/ADCY7/FOXO3/PTGER4/BLM/GNG2/SPIDR/TP53INP1/PTCH1/FOS/CTNNA1/PRKCE/PTGER2/PTGDR/CYBB	22
celltypes.CD4 T cell.down	celltypes	CD4 T cell	down	BP	GO:2000628	regulation of miRNA metabolic process	21/2018	83/14457	0.253012	1.81258	2.99027	0.00419873	0.0300268	0.022301	NEAT1/XIST/RC3H2/RC3H1/NFATC3/POU2F1/PPARA/QKI/NCOR1/NR3C1/ZSWIM8/SMAD3/FOXO3/ZC3H12A/HIF1A/TGFB1/BMPR1A/JUN/NOTCH2/FOS/EGR1	21
celltypes.CD4 T cell.down	celltypes	CD4 T cell	down	BP	GO:0099563	modification of synaptic structure	12/2018	38/14457	0.315789	2.26232	3.13824	0.00425822	0.0304136	0.0225883	KIF5B/CAP1/EGLN1/RAP1B/GRIPAP1/RHOA/DLGAP4/ABL1/EPHA4/RHOB/ABI3/AGAP1	12
celltypes.CD4 T cell.down	celltypes	CD4 T cell	down	BP	GO:0099170	postsynaptic modulation of chemical synaptic transmission	10/2018	29/14457	0.344828	2.47035	3.19234	0.00437521	0.0310911	0.0230915	PPP3R1/SNX14/BRAF/MDM2/USP8/RNF19A/PTK2B/PPP3CA/PLCB1/TRIO	10
celltypes.CD4 T cell.down	celltypes	CD4 T cell	down	BP	GO:0006935	chemotaxis	68/2018	358/14457	0.189944	1.36076	2.78396	0.00451313	0.0318254	0.0236368	RALBP1/CORO1B/RAC1/MAP2K1/CRKL/RHOA/ADAM10/PIKFYVE/CAMK1D/NCKAP1L/CKLF/SCRIB/HMGB1/ADAM17/DOCK2/CYRIB/SMAD3/LGALS3/BSG/SLC12A2/SLAMF1/DUSP1/LSP1/MEGF8/ST6GAL1/SPN/TGFB1/NEDD9/STK39/PTPRJ/PRKCD/PTK2B/S100A4/PLP2/MAPK1/PDE4B/ANXA1/KLRK1/PREX1/PIK3CG/KIF21A/CCR6/CXCR4/LYST/TNFSF14/FCER1G/ADAM8/ITGA1/SEMA4B/KIT/CXCR3/STAP1/CXCR5/CXCR6/SWAP70/CCL5/VAV3/NR4A1/CD74/DAPK2/ALOX5/CCR5/CX3CR1/CCL4/XCL1/LYN/…	68
celltypes.CD4 T cell.down	celltypes	CD4 T cell	down	BP	GO:0007492	endoderm development	19/2018	73/14457	0.260274	1.86461	2.98286	0.00451765	0.0318254	0.0236368	ITGA4/RTF1/PAF1/CTNNB1/MAP2K1/SSBP3/MYH9/GRB2/SETD2/SMAD3/DUSP1/BPTF/TGFB1/ZFP36L1/BMPR1A/DUSP2/DUSP5/DUSP4/EOMES	19
celltypes.CD4 T cell.down	celltypes	CD4 T cell	down	BP	GO:0010038	response to metal ion	58/2018	297/14457	0.195286	1.39903	2.79866	0.00453879	0.0318254	0.0236368	MT-CYB/CALM2/PARK7/PPP2CA/MICU2/MECP2/UCP2/MT-CO1/NEK7/CASP3/BRAF/MDM2/CAT/ADD1/PRNP/LIG4/FECH/PARP1/CAMK2D/TXNIP/CRIP1/ADCY7/CPNE3/LTA4H/SETD2/JUND/SLC30A1/PPP1CA/BSG/SLC12A2/BCL2/ABAT/TFRC/ALOX5AP/HIF1A/MNAT1/EIF2AK3/STK39/SLC30A4/PTK2B/G6PD/NFATC2/PAM/TCIRG1/PPP3CA/PLSCR1/IQGAP1/SLC25A24/NPC1/FOS/P2RX5/CPNE7/HVCN1/KIT/CLIC4/PLCG2/MEF2C/CYBB	58
celltypes.CD4 T cell.down	celltypes	CD4 T cell	down	BP	GO:0016049	cell growth	82/2018	445/14457	0.18427	1.32011	2.76264	0.00455535	0.0318875	0.0236829	ITGA4/EIF4G2/MAPKAP1/ARIH2/ITSN2/MECP2/CSNK2A1/CIB1/PAFAH1B1/ADIPOR1/H3-3A/CTNNB1/CLSTN1/TTL/KMT2D/USP9X/AKT1/SERTAD2/GOLGA4/GSK3B/CRKL/PPARA/DNM2/INO80/ADAM10/RNF6/H3-3B/BTG1/RBBP7/HSPA1A/NME6/TAOK2/ADAM17/TRPV2/TSG101/CAMK2D/DNAJB2/PRR5/SMAD3/OSGIN2/CDKN2D/MAD2L2/RPS6KA1/ACSL4/EXOSC4/MEGF8/KDM2B/BCL2/MACF1/SPG11/BCL6/ABL1/NEDD4L/MEX3C/TGFB1/ITCH/PTPRJ/EXTL3/PTK2B/VCL/RB1/RUFY3/MTPN/G6PD/PPP1R9B…	82
celltypes.CD4 T cell.down	celltypes	CD4 T cell	down	BP	GO:0042552	myelination	32/2018	144/14457	0.222222	1.59201	2.87563	0.00457529	0.0319872	0.023757	PPP3R1/NRDC/DEGS1/DLG1/CTNNB1/DICER1/AKT1/MAP2K1/QKI/SKI/PIKFYVE/SOS1/MAP2K2/HEXA/GRB2/SIRT2/ILK/NF1/CD9/TGFB1/HYCC1/EIF2AK3/MBP/FIG4/CTSC/MAPK1/B4GALT5/TNFRSF1B/ABCA2/CXCR4/TSPAN2/CST7	32
celltypes.CD4 T cell.down	celltypes	CD4 T cell	down	BP	GO:0019216	regulation of lipid metabolic process	55/2018	279/14457	0.197133	1.41226	2.80066	0.00458668	0.032027	0.0237866	CTDNEP1/TBL1XR1/FBXW7/STUB1/KPNB1/NR1D2/UBR4/ADIPOR1/ZBTB20/H6PD/AKT1/TMX1/PPARA/QKI/KAT5/RORA/RNF213/LACTB/NPC2/NCOR1/MTMR9/NR3C1/ZMPSTE24/ASAH1/EIF6/SCP2/SIRT2/WDTC1/KAT2B/ACADVL/NCOA2/PSAP/STARD4/CHP1/ABHD6/CPT1A/PRKCD/FABP5/RDH10/CAPN2/MAPK1/GFI1/ABCA2/PIK3CG/LPCAT1/CLSTN3/ID2/CHLSN/PRKCE/LPGAT1/KIT/CD74/EGR1/PLCG2/RUBCNL	55
celltypes.CD4 T cell.down	celltypes	CD4 T cell	down	BP	GO:0016052	carbohydrate catabolic process	36/2018	167/14457	0.215569	1.54434	2.84974	0.00466385	0.0325254	0.0241568	PPP2CA/ATG12/RB1CC1/GAPDH/UCP2/EP300/ADPGK/ZBTB20/TPI1/LDHA/LIPA/PPARA/ARNT/PGAM1/OGDH/NCOR1/WDR45/PFKL/MANBA/ATG2A/EIF6/ZBTB7A/NEU1/PFKP/PPP1R3D/KAT2B/PPP1CA/PRXL2C/PFKFB2/HIF1A/DHTKD1/WIPI1/GPD2/GK5/GABARAPL1/GM2A	36
celltypes.CD4 T cell.down	celltypes	CD4 T cell	down	BP	GO:0001503	ossification	69/2018	365/14457	0.189041	1.35429	2.76132	0.00477517	0.0331033	0.024586	HNRNPU/ATP5F1B/SNRNP200/NIPBL/CLTC/H3-3A/CTNNB1/AKT1/TMCO1/GSK3B/RHOA/SKI/H3-3B/CAT/RBPJ/ALYREF/ZMPSTE24/TRAF6/SIRT7/TPM4/SETD2/SMAD3/JUND/BPNT2/PTGER4/RRBP1/HSD17B4/ILK/BCL2/HIRA/BCOR/HIF1A/CHSY1/NF1/TOB2/TGFB1/KLF10/EIF2AK3/INPPL1/ID3/RASSF2/BMP2K/BMPR1A/PTK2B/OSTF1/MEF2D/ATP2B1/LIMD1/TCIRG1/MAPK1/PPP3CA/PTCH1/SMAD7/RUNX3/RXRA/TENT5A/SRGN/ZBTB16/RRAS2/SNX10/CLIC1/SMAD5/CRIM1/FOSL2/ADRB2/CEBPD/T…	69
celltypes.CD4 T cell.down	celltypes	CD4 T cell	down	BP	GO:0006979	response to oxidative stress	69/2018	365/14457	0.189041	1.35429	2.76132	0.00477517	0.0331033	0.024586	PARK7/MAPKAP1/MT-ND1/SELENOK/MT-ND5/UCP2/RIPK1/PRDX6/UBR4/MT-CO1/STAT6/AKT1/GSR/MT-ND6/ARNT/CUL3/CASP3/CYB5B/HSPA1A/HTRA2/MDM2/SETX/CAT/PRNP/PARP1/TXNIP/PRDX5/GCLM/SELENOS/PNPLA8/SIRT2/KAT2B/FOXO3/KEAP1/BCL2/FOXO4/ZC3H12A/ABL1/RIPK3/HIF1A/ERN1/JAK2/MICB/AGAP3/PRKCD/PTK2B/RRM2B/G6PD/GSTP1/SESN2/CAPN2/MAP3K5/TP53INP1/VRK2/TNFAIP3/NR4A2/SLC25A24/ERMP1/CD38/PAWR/FOS/RHOB/HBA1/HBB/HBA2/PRR5L/IL18RAP/A…	69
celltypes.CD4 T cell.down	celltypes	CD4 T cell	down	BP	GO:0045190	isotype switching	15/2018	53/14457	0.283019	2.02755	3.01851	0.00478794	0.0331033	0.024586	STAT6/NSD2/NBN/LIG4/MAD2L2/BCL6/SANBR/TFRC/PCYT1A/TGFB1/CCR6/SLC15A4/SWAP70/CD40/TBX21	15
celltypes.CD4 T cell.down	celltypes	CD4 T cell	down	BP	GO:0048041	focal adhesion assembly	21/2018	84/14457	0.25	1.79101	2.92845	0.00487837	0.0335014	0.0248816	PTPRA/RAC1/RHOA/SLK/DAPK3/ROCK1/TAOK2/SMAD3/TLN1/BCL2/MACF1/BCR/ABL1/PEAK1/DUSP22/PTPRJ/PTK2B/VCL/CLASP1/CORO1C/PHLDB2	21
celltypes.CD4 T cell.down	celltypes	CD4 T cell	down	BP	GO:0033032	regulation of myeloid cell apoptotic process	9/2018	25/14457	0.36	2.57905	3.18269	0.0048932	0.0335014	0.0248816	ADAM17/SELENOS/BCL2/ST6GAL1/NF1/ANXA1/CCL5/CCR5/MEF2C	9
celltypes.CD4 T cell.down	celltypes	CD4 T cell	down	BP	GO:0034446	substrate adhesion-dependent cell spreading	23/2018	95/14457	0.242105	1.73445	2.89273	0.00508207	0.0346258	0.0257167	ITGA4/P4HB/CIB1/RAC1/ARPC2/WASHC2C/CRKL/RHOA/PIK3R1/BRAF/SRGAP2/FERMT3/TRIOBP/ILK/ST6GAL1/ABL1/PEAK1/NEDD9/TESK1/FLNA/PREX1/CORO1C/ACTN4	23
celltypes.CD4 T cell.down	celltypes	CD4 T cell	down	BP	GO:0141188	nucleic acid catabolic process	62/2018	323/14457	0.19195	1.37514	2.74632	0.00511254	0.0347492	0.0258084	HNRNPU/TRIR/HNRNPA0/ELOB/NEAT1/XIST/XRN1/SMG1/ZCCHC17/THRAP3/RNPS1/ZFP36L2/ZC3H18/RC3H2/ALKBH5/ELAVL1/CARHSP1/LSM7/RC3H1/RBM38/RBM8A/APAF1/FAM76B/UPF2/DICER1/AKT1/FMR1/ZCCHC7/QKI/SAMD4B/ZFP36/HSPA1A/GTPBP1/BTG2/ROCK1/DNASE2/MEX3D/PCID2/EIF4ENIF1/ZSWIM8/ISG20/MYD88/NUDT16/TUT7/ZHX2/EXOSC4/ZC3H12A/ERN1/TESK1/MAPKAPK2/ZFP36L1/PRKCD/SIDT2/CTIF/AGO4/PATL2/TNFRSF1B/TENT5A/YBX3/TENT5C/SLFN13/PRR5L	62
celltypes.CD4 T cell.down	celltypes	CD4 T cell	down	BP	GO:0045006	DNA deamination	6/2018	13/14457	0.461538	3.30647	3.35095	0.00522414	0.0352367	0.0261705	EXOSC4/APOBEC3D/APOBEC3F/APOBEC3C/APOBEC3G/APOBEC3H	6
celltypes.CD4 T cell.down	celltypes	CD4 T cell	down	BP	GO:0035592	establishment of protein localization to extracellular region	59/2018	305/14457	0.193443	1.38583	2.743	0.00522815	0.0352367	0.0261705	PARK7/SEL1L/CCDC186/BLOC1S6/UCP2/PAFAH1B1/M6PR/TMED10/AP1G1/ENSA/GSDMD/GOLPH3/PFKL/TANGO2/BSG/SLC12A2/ARF6/ACSL4/RAB11FIP5/ARFGAP3/SELENOT/ABAT/GNPTAB/PFKFB2/HIF1A/JAK2/TGFB1/CYB5R4/NEO1/CPT1A/BAIAP3/MIDN/SIDT2/ITPR1/PRKCB/ARFIP1/NADK/PRKAR1A/TCIRG1/DNAJC1/PPP3CA/AP1B1/RAB11FIP1/CD38/CLSTN3/PLCB1/RAB27A/RHBDF2/PRKCE/CD200/ADAM8/GPR68/CCL5/BLK/F2R/PRF1/ALOX5/PLEK/HLA-DRB1	59
celltypes.CD4 T cell.down	celltypes	CD4 T cell	down	BP	GO:1905244	regulation of modification of synaptic structure	8/2018	21/14457	0.380952	2.72915	3.19383	0.00531792	0.035756	0.0265561	KIF5B/EGLN1/GRIPAP1/RHOA/ABL1/EPHA4/RHOB/AGAP1	8
celltypes.CD4 T cell.down	celltypes	CD4 T cell	down	BP	GO:0006809	nitric oxide biosynthetic process	18/2018	69/14457	0.26087	1.86888	2.9139	0.00548287	0.036608	0.0271889	RAC1/HSP90AA1/AKT1/NFATC3/RORA/CYB5B/SMAD3/CYB5R3/ZC3H12A/JAK2/ASL/PTK2B/ATP2B4/DDAH2/KLRK1/ACP5/HBB/CX3CR1	18
celltypes.CD4 T cell.down	celltypes	CD4 T cell	down	BP	GO:0010324	membrane invagination	16/2018	59/14457	0.271186	1.94279	2.92267	0.00574209	0.0377942	0.0280699	CHMP4A/RHOA/ARF1/CLCN3/SNX3/NCKAP1L/MYH9/ARHGAP25/SNX18/FCHO2/STAP1/GSN/ITGAM/CD300A/PLCG2/RAB31	16
celltypes.CD4 T cell.down	celltypes	CD4 T cell	down	BP	GO:0045428	regulation of nitric oxide biosynthetic process	15/2018	54/14457	0.277778	1.99001	2.93562	0.00579175	0.0378992	0.0281479	RAC1/HSP90AA1/AKT1/NFATC3/SMAD3/ZC3H12A/JAK2/ASL/PTK2B/ATP2B4/DDAH2/KLRK1/ACP5/HBB/CX3CR1	15
celltypes.CD4 T cell.down	celltypes	CD4 T cell	down	BP	GO:0030278	regulation of ossification	25/2018	107/14457	0.233645	1.67384	2.81782	0.00586363	0.0381917	0.0283651	NIPBL/RBPJ/ZMPSTE24/SETD2/SMAD3/PTGER4/BCL2/BCOR/HIF1A/CHSY1/TOB2/TGFB1/BMP2K/BMPR1A/PTK2B/ATP2B1/MAPK1/SMAD7/RXRA/TENT5A/SRGN/ZBTB16/ADRB2/ALOX5/MEF2C	25
celltypes.CD4 T cell.down	celltypes	CD4 T cell	down	BP	GO:0141193	nuclear receptor-mediated signaling pathway	34/2018	158/14457	0.21519	1.54163	2.75719	0.00601345	0.0391222	0.0290562	PARK7/HUWE1/STUB1/TAF7/EP300/CALCOCO1/KMT2D/DNAJA1/CRKL/PPARA/RHOA/RNF6/TMF1/NCOR1/NR3C1/PARP1/ZBTB7A/NCOA3/NCOA1/TADA3/PRCP/VPS18/NCOA2/ZDHHC7/SP100/JAK2/FABP5/PMEPA1/YWHAH/MAPK1/ZMIZ1/ACTN4/RXRA/CTBP2	34
celltypes.CD4 T cell.down	celltypes	CD4 T cell	down	BP	GO:0010639	negative regulation of organelle organization	65/2018	344/14457	0.188953	1.35367	2.67397	0.00609759	0.0396238	0.0294287	HNRNPU/PRP4K/APC/GHITM/HUWE1/XRN1/CORO1B/TNKS2/VAT1/BAZ1B/CIB1/CCP110/H3-3A/ATRX/AKT1/WASHC2C/PRELID1/GDI2/OPA1/H3-3B/PIK3R1/NBN/HSPA1A/CDK5RAP2/SSH2/ACAA2/NME6/WAS/ARAP1/ADD1/PCID2/PARP1/CYRIB/TINF2/DYNC1LI1/NAA10/CAPZA1/KAT2B/TRIOBP/ZWILCH/CKAP2/DUSP1/MAD2L2/MAP4/HIP1R/F11R/TFRC/RDX/TESK1/FEZ2/LUZP1/SSH1/PRKCD/TBCD/CLASP1/MTPN/SLC25A4/CAPG/PATL2/CLSTN3/LMNA/GEN1/PHLDB2/GSN/SWAP70	65
celltypes.CD4 T cell.down	celltypes	CD4 T cell	down	BP	GO:0150076	neuroinflammatory response	18/2018	70/14457	0.257143	1.84218	2.84485	0.00643968	0.0413685	0.0307245	NR3C1/GRN/IFNGR1/JAK2/CTSC/ITGB1/TNFRSF1B/CALHM2/SYT11/CD200/STAP1/ITGAM/ZEB2/CX3CR1/CST7/PLCG2/TYROBP/LYN	18
celltypes.CD4 T cell.down	celltypes	CD4 T cell	down	BP	GO:0031667	response to nutrient levels	81/2018	445/14457	0.182022	1.30401	2.6237	0.00659707	0.0421388	0.0312966	MT-CYB/GABARAP/TBL1XR1/MAPKAP1/BNIP2/SAR1A/GNAI2/PDP2/UCP2/EP300/USF2/CREBBP/H6PD/ENSA/APAF1/RRAGC/AKT1/LIPA/PPARA/ZFP36/KAT5/MBD2/PTPN1/MDM2/CAT/ACADM/WDR45/VPS41/PPM1D/KDM4A/RNF167/NCOA3/PRR5/NCOA1/GCLM/SIRT2/CPEB4/PLIN3/CDKN2D/EIF2AK2/KAT2B/FOXO3/YWHAZ/SH3GLB1/ACSL1/BCL2/YARS1/MAP1LC3B/FOXO4/ZC3H12A/TFRC/CHSY1/TGFB1/FADS1/KLF10/ASL/EIF2AK3/WIPI1/STK39/CPT1A/IFI16/RALB/PRKCB/G6PD/SESN2/MAP3K5/M…	81
celltypes.CD4 T cell.down	celltypes	CD4 T cell	down	BP	GO:0035821	modulation of process of another organism	25/2018	108/14457	0.231481	1.65834	2.76594	0.006643	0.0422983	0.0314151	BRD4/CFL1/EP300/CDK9/FMR1/PPARA/ZBED1/RAB29/SNX3/IGF2R/TRIM26/ZC3H12A/LY6E/SMARCB1/JUN/SMC6/STOM/GSN/CCL5/CD74/APOBEC3H/PRF1/CIITA/CX3CR1/CCL4	25
celltypes.CD4 T cell.down	celltypes	CD4 T cell	down	BP	GO:0070266	necroptotic process	12/2018	40/14457	0.3	2.14921	2.93145	0.00673347	0.0426226	0.0316559	RIPK1/RBCK1/BIRC3/PARP1/CFLAR/RIPK3/ITPK1/ITCH/SLC25A4/YBX3/ZBP1/FASLG	12
celltypes.CD4 T cell.down	celltypes	CD4 T cell	down	BP	GO:0017148	negative regulation of translation	28/2018	125/14457	0.224	1.60474	2.73504	0.0068319	0.0431876	0.0320756	XRN1/DDX6/GAPDH/CSNK2A1/PURB/EIF4EBP2/FMR1/QKI/SAMD4B/ZFP36/BTG2/DAPK3/SCRIB/EIF4ENIF1/EIF6/CPEB4/EIF2AK2/EIF2AK3/EPHA4/LIMD1/SESN2/AGO4/EIF4EBP1/PATL2/RGS2/MAP3K20/GZMB/BANK1	28
celltypes.CD4 T cell.down	celltypes	CD4 T cell	down	BP	GO:0090148	membrane fission	13/2018	45/14457	0.288889	2.06961	2.89441	0.0069355	0.0434125	0.0322426	CHMP4B/CHMP4A/VPS4B/VPS36/EXOC5/CHMP1B/DNM2/TSG101/STAM2/CHMP1A/SH3GLB1/VPS37B/CORO1C	13
celltypes.CD4 T cell.down	celltypes	CD4 T cell	down	BP	GO:0140894	endolysosomal toll-like receptor signaling pathway	13/2018	45/14457	0.288889	2.06961	2.89441	0.0069355	0.0434125	0.0322426	HMGB1/TRAF6/MYD88/IRAK1/WDFY1/RFTN1/GRAMD4/OAS1/TNFAIP3/PTPN22/SLC15A4/FCRL3/PIK3AP1	13
celltypes.CD4 T cell.down	celltypes	CD4 T cell	down	BP	GO:0140253	cell-cell fusion	14/2018	50/14457	0.28	2.00593	2.86983	0.00699967	0.0435716	0.0323608	CD53/MYH9/DOCK2/EHD1/CFLAR/CD9/IL4R/NEO1/NFATC2/CAPN2/ITGB1/CD81/TNFSF14/TYROBP	14
celltypes.CD4 T cell.down	celltypes	CD4 T cell	down	BP	GO:0072711	cellular response to hydroxyurea	5/2018	10/14457	0.5	3.58201	3.28974	0.00721111	0.0445425	0.0330819	ATRX/DDI2/BLM/SPIDR/TIMELESS	5
celltypes.CD4 T cell.down	celltypes	CD4 T cell	down	BP	GO:0071692	protein localization to extracellular region	59/2018	310/14457	0.190323	1.36348	2.60565	0.00743831	0.0456844	0.0339299	PARK7/SEL1L/CCDC186/BLOC1S6/UCP2/PAFAH1B1/M6PR/TMED10/AP1G1/ENSA/GSDMD/GOLPH3/PFKL/TANGO2/BSG/SLC12A2/ARF6/ACSL4/RAB11FIP5/ARFGAP3/SELENOT/ABAT/GNPTAB/PFKFB2/HIF1A/JAK2/TGFB1/CYB5R4/NEO1/CPT1A/BAIAP3/MIDN/SIDT2/ITPR1/PRKCB/ARFIP1/NADK/PRKAR1A/TCIRG1/DNAJC1/PPP3CA/AP1B1/RAB11FIP1/CD38/CLSTN3/PLCB1/RAB27A/RHBDF2/PRKCE/CD200/ADAM8/GPR68/CCL5/BLK/F2R/PRF1/ALOX5/PLEK/HLA-DRB1	59
celltypes.CD4 T cell.down	celltypes	CD4 T cell	down	BP	GO:0007064	mitotic sister chromatid cohesion	10/2018	31/14457	0.322581	2.31098	2.94303	0.00745287	0.0456844	0.0339299	SMC3/NIPBL/POGZ/ATRX/PDS5B/SLF1/HDAC8/NAA10/RB1/NAA50	10
celltypes.CD4 T cell.down	celltypes	CD4 T cell	down	BP	GO:0071479	cellular response to ionizing radiation	18/2018	71/14457	0.253521	1.81623	2.77693	0.00752771	0.0458432	0.0340479	NIPBL/RAD9A/INO80/MDM2/TMEM109/ZMPSTE24/GRB2/LIG4/BARD1/TANK/BLM/TGFB1/IFI16/SPIDR/CDKN1A/RHOB/MAP3K20/EGR1	18
celltypes.CD4 T cell.down	celltypes	CD4 T cell	down	BP	GO:0072523	purine-containing compound catabolic process	32/2018	149/14457	0.214765	1.53858	2.66163	0.00776189	0.0471671	0.0350312	PPP2CA/GAPDH/UCP2/EP300/NUDT3/ADPGK/ZBTB20/TPI1/LDHA/NT5C2/PDE4D/LIPA/PPARA/ARNT/PGAM1/OGDH/NCOR1/PFKL/EIF6/ZBTB7A/PFKP/NUDT16/NT5E/KAT2B/PRXL2C/PFKFB2/HIF1A/DHTKD1/NT5C/PDE4B/ENPP4/PDE4A	32
celltypes.CD4 T cell.down	celltypes	CD4 T cell	down	BP	GO:0097401	synaptic vesicle lumen acidification	7/2018	18/14457	0.388889	2.78601	3.05382	0.00794428	0.0477592	0.0354709	ATP6V1E1/ATP6AP1/CLCN3/ATP6V1D/ATP6V0C/ATP6V0D1/ATP6V1A	7
celltypes.CD4 T cell.down	celltypes	CD4 T cell	down	BP	GO:0120034	positive regulation of plasma membrane bounded cell projection assembly	24/2018	104/14457	0.230769	1.65324	2.69282	0.00803277	0.0478732	0.0355556	APC/CCP110/RAC1/HSP90AA1/ARPC2/FMR1/GSK3B/ACTR2/PIK3R1/ACTR3/HTT/ARAP1/CPAP/KCTD17/MIEN1/PLEKHM1/DEF8/SEPTIN7/ARHGAP35/CDC42EP3/TGFBR1/RHOQ/AUTS2/KIT	24
celltypes.CD4 T cell.down	celltypes	CD4 T cell	down	BP	GO:1901203	positive regulation of extracellular matrix assembly	6/2018	14/14457	0.428571	3.0703	3.12147	0.00807398	0.0478732	0.0355556	SMAD3/MAD2L2/TGFB1/CLASP1/TGFBR1/PHLDB2	6
celltypes.CD4 T cell.down	celltypes	CD4 T cell	down	BP	GO:0070588	calcium ion transmembrane transport	55/2018	287/14457	0.191638	1.3729	2.57002	0.00827558	0.0489138	0.0363284	CALM2/TMBIM6/GHITM/PPP3R1/MICU2/DIAPH1/UCP2/PDPK1/PDE4D/FMR1/TMCO1/ITPR2/HTT/VDAC1/PRNP/TRPV2/CAMK2D/GNB5/STIM2/TMEM165/BCL2/ABL1/TGFB1/PTK2B/TMEM38A/ITPR1/ATP2B4/ATP2B1/G6PD/PDE4B/PPP3CA/ORAI3/ATP2A3/FLNA/CYBA/PIK3CG/PLCB1/SESTD1/AHNAK/PRKCE/P2RX5/ORAI2/RGS9/CXCR3/F2R/CCR5/FASLG/PLCG2/CD19/AKAP5/TSPAN13/MS4A1/XCL1/LYN/DMD	55
celltypes.CD4 T cell.down	celltypes	CD4 T cell	down	BP	GO:0008347	glial cell migration	15/2018	56/14457	0.267857	1.91893	2.77507	0.00830583	0.0490411	0.036423	SUN2/PAFAH1B1/CTNNB1/CRKL/SRGAP2/SCRIB/SYNE2/NF1/CD9/EPHA4/ZMIZ1/RRAS2/STAP1/CX3CR1/ADGRG1	15
celltypes.CD4 T cell.down	celltypes	CD4 T cell	down	BP	GO:0060606	tube closure	20/2018	83/14457	0.240964	1.72627	2.67264	0.00908819	0.0529375	0.0393169	KIF20B/APAF1/OPA1/SKI/CASP3/PHACTR4/SCRIB/BRD2/WDR83/TRAF6/VASP/SETD2/IFT57/KDM2B/ABL1/TGFB1/LMO4/ARHGAP35/PTCH1/ST14	20
celltypes.CD4 T cell.down	celltypes	CD4 T cell	down	BP	GO:0061008	hepaticobiliary system development	28/2018	128/14457	0.21875	1.56713	2.5958	0.00950675	0.0548445	0.0407332	FBXW7/RB1CC1/NIPBL/UCP2/UPF2/LIPA/CUL3/ACADM/ZMPSTE24/SMAD3/IGF2R/RPS6KA1/ARF6/CFLAR/NF1/TGFB1/JARID2/GUCD1/CPT1A/RCBTB2/SMARCB1/TNFAIP3/PTCH1/NOTCH2/ARID5B/NPC1/MPST/TGFBR3	28
celltypes.CD4 T cell.down	celltypes	CD4 T cell	down	BP	GO:0045661	regulation of myoblast differentiation	16/2018	62/14457	0.258065	1.84878	2.6976	0.00953265	0.0548445	0.0407332	HIF1AN/SMARCD2/SMARCE1/KAT5/BTG1/ARID1B/SRA1/TGFB1/ZFP36L1/ID3/MBNL3/SMARCB1/MAP3K5/PLCB1/TNFSF14/MEF2C	16
celltypes.CD4 T cell.down	celltypes	CD4 T cell	down	BP	GO:0051604	protein maturation	86/2018	484/14457	0.177686	1.27295	2.46007	0.00988204	0.0563451	0.0418477	AHSA1/ANP32E/P4HB/DNAJB14/STUB1/ATG4B/FKBP2/PDIA6/SEC11A/EP300/CSNK2A1/UGGT1/DNAJC5/CREBBP/PIGX/HSP90AA1/CDC123/BAG1/RIC8A/DNAJB11/AKT1/DNAJA1/SPCS2/TBCB/ADAM10/CPD/CASP3/HSPA1A/HTRA2/MDM2/HSPA4/DDI2/ERP44/DNAJC10/FAM111A/ADAM17/MYH9/GAK/PRNP/ZMPSTE24/PARP1/UNC45A/DNAJB2/TAPBP/DNAJB6/GZMM/WIPF1/WDR83OS/NAA10/KAT2B/GRN/PRCP/DISP1/CASP4/RCE1/PIGB/DYNC2H1/TXNDC5/ATG4D/TBCD/RP2/CASP1/CASP7/QSOX1/CAPN…	86
celltypes.CD4 T cell.down	celltypes	CD4 T cell	down	BP	GO:0042092	type 2 immune response	11/2018	37/14457	0.297297	2.12984	2.77159	0.010004	0.0563451	0.0418477	STAT6/SOCS5/BCL6/IL4R/DENND1B/ANXA1/CD81/BCL3/CD74/TBX21/XCL1	11
celltypes.CD4 T cell.down	celltypes	CD4 T cell	down	BP	GO:0014044	Schwann cell development	12/2018	42/14457	0.285714	2.04686	2.73653	0.0102215	0.0571121	0.0424174	PPP3R1/DICER1/AKT1/MAP2K1/SKI/SOS1/MAP2K2/GRB2/SIRT2/ILK/NF1/MAPK1	12
celltypes.CD4 T cell.down	celltypes	CD4 T cell	down	BP	GO:0031641	regulation of myelination	12/2018	42/14457	0.285714	2.04686	2.73653	0.0102215	0.0571121	0.0424174	NRDC/DLG1/CTNNB1/DICER1/AKT1/QKI/SIRT2/EIF2AK3/FIG4/CTSC/TNFRSF1B/CST7	12
celltypes.CD4 T cell.down	celltypes	CD4 T cell	down	BP	GO:0060236	regulation of mitotic spindle organization	12/2018	42/14457	0.285714	2.04686	2.73653	0.0102215	0.0571121	0.0424174	HNRNPU/CLTC/CHMP4B/CHMP4A/VPS4B/CHMP1B/DYNC1H1/HSPA1A/DCTN1/CPAP/CHMP1A/GPSM2	12
celltypes.CD4 T cell.down	celltypes	CD4 T cell	down	BP	GO:0071453	cellular response to oxygen levels	31/2018	146/14457	0.212329	1.52113	2.54905	0.0102467	0.0571303	0.0424309	P4HB/TMBIM6/NPEPPS/EGLN1/ATP6AP1/AKT1/VHL/RORA/VMA22/PTPN1/MDM2/ACAA2/ADO/SIRT2/CPEB4/IRAK1/FOXO3/BCL2/CFLAR/HIF1A/TGFB1/ZFP36L1/ATP6V0D1/EPHA4/ATP6V1A/LMNA/FOS/PMAIP1/PRKCE/ADAM8/CYBB	31
celltypes.CD4 T cell.down	celltypes	CD4 T cell	down	BP	GO:0044772	mitotic cell cycle phase transition	75/2018	415/14457	0.180723	1.2947	2.4535	0.0103082	0.057369	0.0426081	CALM2/PRP4K/BRD4/APC/PPP2CA/TAOK3/ZFP36L2/CHMP4B/DLG1/VPS4B/SMARCD2/ENSA/DPF2/AKT1/CDC27/DNM2/INO80/CUL3/SMARCE1/CCNG2/NBN/ARID1B/CDK5RAP2/KMT2E/MDM2/PSME1/FBXO7/TAOK2/ADAM17/PCID2/CPAP/PPM1D/APPL1/DYNC1LI1/SIRT2/TCF3/PSME3/CDKN2D/ARPP19/ZWILCH/BARD1/DUSP1/MAD2L2/BCL2/FOXO4/BLM/CTDSP1/NABP2/LSM10/RDX/UBE2A/TGFB1/MNAT1/ZFP36L1/SMARCB1/RRM2B/RB1/CLASP1/KLF11/PPP1R9B/BTN2A2/ANXA1/EIF4EBP1/PPP3CA/ITG…	75
celltypes.CD4 T cell.down	celltypes	CD4 T cell	down	BP	GO:0048145	regulation of fibroblast proliferation	20/2018	84/14457	0.238095	1.70572	2.6127	0.0104038	0.0577861	0.0429179	FTH1/EMD/CTNNB1/BMI1/SKI/ZMPSTE24/LIG4/MED25/ABL1/NF1/TGFB1/GSTP1/TP53INP1/ZMIZ1/CDKN1A/PAWR/FOSL2/IFI30/CD74/CD300A	20
celltypes.CD4 T cell.down	celltypes	CD4 T cell	down	BP	GO:0097581	lamellipodium organization	20/2018	84/14457	0.238095	1.70572	2.6127	0.0104038	0.0577861	0.0429179	CORO1B/RAC1/HSP90AA1/ARPC2/ACTR2/ABI1/GOLPH3/PIK3R1/ACTR3/WAS/SRGAP2/MYO9B/VCL/SNX2/ITGB1/CORO1C/ABI3/AUTS2/KIT/VAV3	20
celltypes.CD4 T cell.down	celltypes	CD4 T cell	down	BP	GO:0062197	cellular response to chemical stress	55/2018	291/14457	0.189003	1.35403	2.45725	0.0109047	0.0603894	0.0448514	PARK7/MAPKAP1/NFAT5/RIPK1/STAT6/SERPINB6/DNAJA1/GSR/ARNT/CUL3/CASP3/HSPA1A/HTRA2/MDM2/SETX/CAT/PARP1/PRDX5/RELB/SELENOS/PNPLA8/SIRT2/KAT2B/FOXO3/KEAP1/ZC3H12A/ABL1/RIPK3/HIF1A/ERN1/AGAP3/EIF2AK3/STK39/ZFP36L1/PRKCD/CASP1/G6PD/SESN2/MAP3K5/TP53INP1/RCSD1/VRK2/TNFAIP3/NR4A2/SLC25A24/ERMP1/SLC2A1/PAWR/FOS/RHOB/YBX3/PRR5L/IL18RAP/ALOX5/BTK	55
celltypes.CD4 T cell.down	celltypes	CD4 T cell	down	BP	GO:0051851	host-mediated perturbation of symbiont process	23/2018	101/14457	0.227723	1.63141	2.56477	0.0109655	0.0605662	0.0449827	BRD4/CFL1/EP300/CDK9/FMR1/ZBED1/RAB29/SNX3/IGF2R/TRIM26/ZC3H12A/LY6E/SMARCB1/JUN/SMC6/STOM/GSN/CCL5/CD74/APOBEC3H/CIITA/CX3CR1/CCL4	23
celltypes.CD4 T cell.down	celltypes	CD4 T cell	down	BP	GO:0060964	regulation of miRNA-mediated gene silencing	9/2018	28/14457	0.321429	2.30272	2.7791	0.0112116	0.060948	0.0452663	ELOB/MECP2/ELAVL1/RIPK1/FMR1/ZFP36/ZMPSTE24/ZSWIM8/TGFB1	9
celltypes.CD4 T cell.down	celltypes	CD4 T cell	down	BP	GO:0030216	keratinocyte differentiation	24/2018	107/14457	0.224299	1.60688	2.53784	0.0114725	0.0623061	0.046275	STK4/MAP2K1/ZFP36/CASP3/ROCK1/RBPJ/SGPP1/TSG101/TXNIP/ASAH1/NCOA3/BCR/PLAAT4/ZFP36L1/EXTL3/ANXA1/PPP3CA/CDKN1A/SAV1/PALLD/CLIC4/FOSL2/DSP/ST14	24
celltypes.CD4 T cell.down	celltypes	CD4 T cell	down	BP	GO:0016554	cytidine to uridine editing	5/2018	11/14457	0.454545	3.25637	3.01527	0.0117157	0.0630784	0.0468486	APOBEC3D/APOBEC3F/APOBEC3C/APOBEC3G/APOBEC3H	5
celltypes.CD4 T cell.down	celltypes	CD4 T cell	down	BP	GO:0072710	response to hydroxyurea	5/2018	11/14457	0.454545	3.25637	3.01527	0.0117157	0.0630784	0.0468486	ATRX/DDI2/BLM/SPIDR/TIMELESS	5
celltypes.CD4 T cell.down	celltypes	CD4 T cell	down	BP	GO:0010975	regulation of neuron projection development	74/2018	411/14457	0.180049	1.28987	2.40129	0.0117411	0.0631549	0.0469054	TMEM30A/EIF4G2/CFL1/NRDC/EP300/CIB1/PAFAH1B1/AKT1/MAP2K1/GOLGA4/GSK3B/CRKL/RHOA/CBFA2T2/RNF6/NPTN/CAMK1D/SHOC2/RAB29/BRAF/PTPN1/MDM2/SETX/SNX3/MAP2K2/FBXO7/GAK/TRPV2/KIF13B/KAT2B/EHD1/SLC30A1/GRN/ARF6/MEGF8/MACF1/CFLAR/ABL1/RAP2A/NEDD4L/NEO1/DTNBP1/RAPGEF2/SKIL/BMPR1A/PTK2B/FIG4/RUFY3/ITM2C/EPHA4/ARHGAP35/YWHAH/GFI1/RAPGEF1/PLXNC1/PPP3CA/NTNG2/FLNA/PREX1/SYNE1/TOX/LIMK1/CD38/SERPINI1/MYLIP/KIF21A…	74
celltypes.CD4 T cell.down	celltypes	CD4 T cell	down	BP	GO:0044843	cell cycle G1/S phase transition	45/2018	231/14457	0.194805	1.39559	2.44119	0.0118814	0.0632162	0.0469509	APC/PPP2CA/FBXW7/DLG1/SMARCD2/PAF1/DPF2/AKT1/INO80/CUL3/SMARCE1/CCNG2/ARID1B/KMT2E/MDM2/PSME1/FBXO7/ADAM17/CPAP/APPL1/TCF3/PSME3/CDKN2D/BCL2/CTDSP1/LSM10/RDX/MNAT1/SMARCB1/RB1/ATP2B4/KLF11/BTN2A2/ANXA1/EIF4EBP1/PPP3CA/ITGB1/SLFN11/CDKN1A/PLCB1/RASSF1/ID2/RBBP8/BCL7A/PLCG2	45
celltypes.CD4 T cell.down	celltypes	CD4 T cell	down	BP	GO:0002679	respiratory burst involved in defense response	6/2018	15/14457	0.4	2.86561	2.91169	0.0118895	0.0632162	0.0469509	SELENOK/LIPA/CYBC1/GRN/PIK3CG/DUSP10	6
celltypes.CD4 T cell.down	celltypes	CD4 T cell	down	BP	GO:0060263	regulation of respiratory burst	6/2018	15/14457	0.4	2.86561	2.91169	0.0118895	0.0632162	0.0469509	RAC1/CAMK1D/GRN/BCR/DUSP10/JCHAIN	6
celltypes.CD4 T cell.down	celltypes	CD4 T cell	down	BP	GO:1903358	regulation of Golgi organization	6/2018	15/14457	0.4	2.86561	2.91169	0.0118895	0.0632162	0.0469509	MAP2K1/AKAP9/MAP2K2/MAPK1/USP6NL/EHD3	6
celltypes.CD4 T cell.down	celltypes	CD4 T cell	down	BP	GO:1903978	regulation of microglial cell activation	6/2018	15/14457	0.4	2.86561	2.91169	0.0118895	0.0632162	0.0469509	GRN/CTSC/CALHM2/SYT11/STAP1/CST7	6
celltypes.CD4 T cell.down	celltypes	CD4 T cell	down	BP	GO:0099072	regulation of postsynaptic membrane neurotransmitter receptor levels	25/2018	113/14457	0.221239	1.58496	2.51433	0.0119245	0.0632162	0.0469509	GABARAP/PPP3R1/DLG1/AP2M1/AP2B1/CLSTN1/HSP90AA1/GRIPAP1/RABEP1/ADAM10/NUMB/MDM2/SCRIB/TRAF6/CLPTM1/RAB8A/CBLB/RAP2A/TFRC/AGAP3/GPSM2/EPS15/SYNE1/DLG3/HIP1	25
celltypes.CD4 T cell.down	celltypes	CD4 T cell	down	BP	GO:0042149	cellular response to glucose starvation	13/2018	48/14457	0.270833	1.94026	2.6281	0.0122859	0.0645492	0.0479409	KAT5/CPEB4/PLIN3/FOXO3/YWHAZ/SH3GLB1/BCL2/ZC3H12A/EIF2AK3/IFI16/SESN2/SLC2A1/PMAIP1	13
celltypes.CD4 T cell.down	celltypes	CD4 T cell	down	BP	GO:0050921	positive regulation of chemotaxis	26/2018	119/14457	0.218487	1.56525	2.4938	0.0123246	0.0645492	0.0479409	RAC1/ADAM10/CAMK1D/NCKAP1L/HMGB1/ADAM17/SMAD3/SLAMF1/MEGF8/TGFB1/NEDD9/STK39/PTPRJ/PTK2B/MAPK1/CCR6/CXCR4/TNFSF14/CXCR3/SWAP70/CCL5/CD74/DAPK2/CX3CR1/CCL4/XCL1	26
celltypes.CD4 T cell.down	celltypes	CD4 T cell	down	BP	GO:0141085	regulation of inflammasome-mediated signaling pathway	12/2018	43/14457	0.27907	1.99926	2.6431	0.0124204	0.0647635	0.0481001	PPP2CA/MAVS/NEK7/MYD88/ABHD17A/SIRT2/EIF2AK2/IFI16/GBP5/PTPN22/PLCG2/BTK	12
celltypes.CD4 T cell.down	celltypes	CD4 T cell	down	BP	GO:0060538	skeletal muscle organ development	32/2018	154/14457	0.207792	1.48863	2.45537	0.0126017	0.0655874	0.048712	MYL6/NR1D2/EP300/EMD/CTNNB1/RHOA/SKI/BTG2/SIRT2/DISP1/BCL2/SPG11/CFLAR/HIVEP3/NF1/TGFB1/SKIL/SAP30/MEF2D/RB1/MAFF/PPP3CA/FOS/YBX3/NR4A1/EOMES/COL19A1/EGR1/MEF2C/DMD/BASP1/PAX5	32
celltypes.CD4 T cell.down	celltypes	CD4 T cell	down	BP	GO:0002532	production of molecular mediator involved in inflammatory response	19/2018	80/14457	0.2375	1.70146	2.53398	0.0126458	0.065756	0.0488372	LIPA/PPARA/VAMP8/ADCY7/MYD88/APPL1/GRN/SNAP23/ZC3H12A/ALOX5AP/HIF1A/IL4R/EXTL3/GBP5/DUSP10/ALOX5/BTK/LYN/SYK	19
celltypes.CD4 T cell.down	celltypes	CD4 T cell	down	BP	GO:0032890	regulation of organic acid transport	16/2018	64/14457	0.25	1.79101	2.55438	0.0130072	0.0673724	0.0500377	SEPTIN2/SLC38A1/AKT1/PPARA/ARL6IP1/REPIN1/SLC12A2/ACSL4/ACSL1/ABAT/DTNBP1/ITGB1/ACSL5/RGS2/SLC43A2/SYK	16
celltypes.CD4 T cell.down	celltypes	CD4 T cell	down	BP	GO:0043304	regulation of mast cell degranulation	8/2018	24/14457	0.333333	2.38801	2.74101	0.0130885	0.0673724	0.0500377	PDPK1/VAMP8/STXBP2/CD84/IL4R/CD300A/LYN/SYK	8
celltypes.CD4 T cell.down	celltypes	CD4 T cell	down	BP	GO:1904705	regulation of vascular associated smooth muscle cell proliferation	14/2018	54/14457	0.259259	1.85734	2.54223	0.0141769	0.0721813	0.0536093	GNAI2/MFN2/MDM2/GNA13/ERN1/JAK2/NF1/BMPR1A/MEF2D/MAP3K5/JUN/CDKN1A/GNA12/MEF2C	14
celltypes.CD4 T cell.down	celltypes	CD4 T cell	down	BP	GO:0007212	G protein-coupled dopamine receptor signaling pathway	9/2018	29/14457	0.310345	2.22332	2.65599	0.0142879	0.0722884	0.0536889	GNAI3/GNB1/GSK3B/GNB5/DTNBP1/NHERF1/GNG2/FLNA/RGS9	9
celltypes.CD4 T cell.down	celltypes	CD4 T cell	down	BP	GO:0050931	pigment cell differentiation	9/2018	29/14457	0.310345	2.22332	2.65599	0.0142879	0.0722884	0.0536889	BLOC1S6/AP3D1/AP1G1/BCL2/RAB27A/CD63/KIT/ZEB2/MEF2C	9
celltypes.CD4 T cell.down	celltypes	CD4 T cell	down	BP	GO:0002269	leukocyte activation involved in inflammatory response	12/2018	44/14457	0.272727	1.95382	2.55217	0.014964	0.0753024	0.0559274	MYD88/GRN/IFNGR1/JAK2/CTSC/CALHM2/SYT11/STAP1/ITGAM/CX3CR1/CST7/TYROBP	12
celltypes.CD4 T cell.down	celltypes	CD4 T cell	down	BP	GO:0071379	cellular response to prostaglandin stimulus	7/2018	20/14457	0.35	2.50741	2.71706	0.0150415	0.0754112	0.0560081	AKT1/GNB1/PTGER4/GNG2/PRKCE/PTGER2/PTGDR	7
celltypes.CD4 T cell.down	celltypes	CD4 T cell	down	BP	GO:0090329	regulation of DNA-templated DNA replication	11/2018	39/14457	0.282051	2.02062	2.57061	0.0150795	0.0754112	0.0560081	ATRX/INO80/NBN/ZMPSTE24/DYNLL1/BCL6/BLM/MCM2/SLFN11/MCM5/TIMELESS	11
celltypes.CD4 T cell.down	celltypes	CD4 T cell	down	BP	GO:0033002	muscle cell proliferation	36/2018	180/14457	0.2	1.4328	2.35343	0.0153838	0.0765919	0.0568851	GNAI2/KPNA1/CTNNB1/MFN2/AKT1/SKI/PIK3R1/MDM2/RBPJ/MYD88/IRAK1/DIPK2A/GNA13/CFLAR/ABL1/ERN1/JAK2/NF1/TGFB1/MNAT1/JARID2/BMPR1A/MEF2D/MAP3K5/PRKAR1A/JUN/TNFAIP3/TGFBR1/CDKN1A/GNA12/SAV1/ID2/FOS/TGFBR3/CCL5/MEF2C	36
celltypes.CD4 T cell.down	celltypes	CD4 T cell	down	BP	GO:0045445	myoblast differentiation	21/2018	93/14457	0.225806	1.61768	2.40692	0.0160484	0.0794084	0.0589769	MBNL1/HIF1AN/SMARCD2/SMARCE1/KAT5/BTG1/ARID1B/SRA1/RBPJ/TGFB1/ZFP36L1/LGALS1/ID3/MBNL3/SMARCB1/RB1/MAP3K5/ITGB1/PLCB1/TNFSF14/MEF2C	21
celltypes.CD4 T cell.down	celltypes	CD4 T cell	down	BP	GO:1901655	cellular response to ketone	21/2018	93/14457	0.225806	1.61768	2.40692	0.0160484	0.0794084	0.0589769	PARK7/XRN1/BMI1/AKT1/GNB1/GOLPH3/BTG2/NR3C1/FECH/USP8/FOXO3/PTGER4/CFLAR/JAK2/TGFB1/MSN/GNG2/FOS/PRKCE/PTGER2/PTGDR	21
celltypes.CD4 T cell.down	celltypes	CD4 T cell	down	BP	GO:0001574	ganglioside biosynthetic process	6/2018	16/14457	0.375	2.68651	2.71858	0.0168155	0.0814788	0.0605146	ST3GAL2/ST3GAL5/ST8SIA4/ST6GALNAC6/B4GALT5/ST8SIA6	6
celltypes.CD4 T cell.down	celltypes	CD4 T cell	down	BP	GO:0035627	ceramide transport	6/2018	16/14457	0.375	2.68651	2.71858	0.0168155	0.0814788	0.0605146	CERT1/SGPP1/PSAP/GLTP/ABCA2/ABCB1	6
celltypes.CD4 T cell.down	celltypes	CD4 T cell	down	BP	GO:0048308	organelle inheritance	6/2018	16/14457	0.375	2.68651	2.71858	0.0168155	0.0814788	0.0605146	GOLGA2/MAP2K1/VCPIP1/MAP2K2/YWHAZ/MAPK1	6
celltypes.CD4 T cell.down	celltypes	CD4 T cell	down	BP	GO:0071380	cellular response to prostaglandin E stimulus	6/2018	16/14457	0.375	2.68651	2.71858	0.0168155	0.0814788	0.0605146	AKT1/GNB1/PTGER4/GNG2/PRKCE/PTGER2	6
celltypes.CD4 T cell.down	celltypes	CD4 T cell	down	BP	GO:0034695	response to prostaglandin E	8/2018	25/14457	0.32	2.29249	2.6051	0.0169452	0.0814788	0.0605146	AKT1/GNB1/PTGER4/GNG2/PPP1R9B/PRKCE/PTGER2/TGFBR3	8
celltypes.CD4 T cell.down	celltypes	CD4 T cell	down	BP	GO:0046434	organophosphate catabolic process	43/2018	224/14457	0.191964	1.37524	2.27968	0.0174156	0.083598	0.0620885	PPP2CA/VCP/GAPDH/MGAT1/UCP2/EP300/PRDX6/NUDT3/ADPGK/ZBTB20/TPI1/LDHA/NT5C2/PDE4D/LIPA/PPARA/ARNT/PGAM1/OGDH/NCOR1/PFKL/PNPLA6/MBD4/EIF6/ZBTB7A/PFKP/PNPLA8/NUDT16/NT5E/KAT2B/GDE1/PRXL2C/ABHD12/PFKFB2/HIF1A/DHTKD1/NT5C/ABHD6/PRKCD/PDE4B/PLCB1/PDE4A/PLCG2	43
celltypes.CD4 T cell.down	celltypes	CD4 T cell	down	BP	GO:0010921	regulation of phosphatase activity	5/2018	12/14457	0.416667	2.98501	2.77068	0.0178079	0.0846139	0.0628431	ROCK1/MTMR9/CHP1/PLEK/MEF2C	5
celltypes.CD4 T cell.down	celltypes	CD4 T cell	down	BP	GO:0070671	response to interleukin-12	5/2018	12/14457	0.416667	2.98501	2.77068	0.0178079	0.0846139	0.0628431	P4HB/JAK2/STAT4/RIPK2/PLCB1	5
celltypes.CD4 T cell.down	celltypes	CD4 T cell	down	BP	GO:1900272	negative regulation of long-term synaptic potentiation	5/2018	12/14457	0.416667	2.98501	2.77068	0.0178079	0.0846139	0.0628431	PRNP/ABL1/EPHA4/CX3CR1/TYROBP	5
celltypes.CD4 T cell.down	celltypes	CD4 T cell	down	BP	GO:0031589	cell-substrate adhesion	60/2018	330/14457	0.181818	1.30255	2.23934	0.0178567	0.0847743	0.0629622	ITGA4/STK4/P4HB/PTPRA/CIB1/RAC1/CTNNB1/ARPC2/WASHC2C/GSK3B/CRKL/RHOA/SLK/PIK3R1/BRAF/PTPN1/DAPK3/ROCK1/SRGAP2/TAOK2/FERMT3/PRKX/SMAD3/TRIOBP/ITGAE/TLN1/UTRN/ILK/BCL2/ST6GAL1/MACF1/BCL6/BCR/ABL1/ITGAL/PEAK1/JAK2/DUSP22/NF1/NEDD9/TESK1/PTPRJ/TBCD/PTK2B/VCL/BCL2L11/CLASP1/ITGB1/ANXA2/FLNA/PREX1/MYO1G/CORO1C/ACTN4/PRKCE/PLEKHA2/ITGA1/CD63/PHLDB2/ITGAM	60
celltypes.CD4 T cell.down	celltypes	CD4 T cell	down	BP	GO:1905144	response to acetylcholine	11/2018	40/14457	0.275	1.97011	2.47459	0.0182453	0.0859929	0.0638672	BLOC1S6/GNAI2/GRK2/GNB1/CRKL/CHRNB1/LY6E/ITPR1/ATP2B4/PRKCB/PLCB1	11
celltypes.CD4 T cell.down	celltypes	CD4 T cell	down	BP	GO:0070670	response to interleukin-4	10/2018	35/14457	0.285714	2.04686	2.49749	0.0183123	0.0859929	0.0638672	JAK1/IL2RG/STAT6/KEAP1/MCM2/IL4R/NFIL3/PARP14/CD40/XCL1	10
celltypes.CD4 T cell.down	celltypes	CD4 T cell	down	BP	GO:0050772	positive regulation of axonogenesis	17/2018	72/14457	0.236111	1.69151	2.36918	0.0187391	0.0874853	0.0649757	EIF4G2/NRDC/PAFAH1B1/MAP2K1/GOLGA4/BRAF/MAP2K2/TRPV2/MEGF8/MACF1/SKIL/RUFY3/PLXNC1/LIMK1/PLXND1/TRAK1/BCL11A	17
celltypes.CD4 T cell.down	celltypes	CD4 T cell	down	BP	GO:0002931	response to ischemia	14/2018	56/14457	0.25	1.79101	2.38874	0.0194203	0.0899625	0.0668154	CIB1/ABRAXAS2/ARID1B/SOS1/CPEB4/SQSTM1/BCL2/MAP2K3/PTK2B/MAP3K5/ITGAM/EGR1/CX3CR1/MEF2C	14
celltypes.CD4 T cell.down	celltypes	CD4 T cell	down	BP	GO:0140888	interferon-mediated signaling pathway	20/2018	89/14457	0.224719	1.60989	2.32457	0.0194297	0.0899625	0.0668154	JAK1/MAVS/STAT2/PARP9/TRIM56/PTPN1/MYD88/IRAK1/SP100/TANK/IFNGR1/JAK2/IFIH1/IRF1/OAS1/PARP14/TBK1/TBKBP1/ZBP1/OASL	20
celltypes.CD4 T cell.down	celltypes	CD4 T cell	down	BP	GO:0060249	anatomical structure homeostasis	44/2018	232/14457	0.189655	1.35869	2.21837	0.0198681	0.0909921	0.0675802	XIAP/CHMP4B/CSK/CTNNB1/LIPA/CLCN3/TPP1/SCRIB/TRAF6/PRDX5/AKT3/NT5E/BSG/BARD1/SLC12A2/BCL2/F11R/TFRC/PLEKHM1/NF1/SASH3/DEF8/STK39/MBP/PTK2B/VCL/RB1/TCIRG1/TNFAIP3/ITGB1/IL10RA/CD38/INPP5D/WHRN/ACP5/SLC2A1/SNX10/ADAM8/FOSL2/ADRB2/F2R/ZEB2/DMD/SYK	44
celltypes.CD4 T cell.down	celltypes	CD4 T cell	down	BP	GO:0044042	glucan metabolic process	18/2018	78/14457	0.230769	1.65324	2.32994	0.0199111	0.0909921	0.0675802	ATG12/RB1CC1/PPP1CC/AKT1/GSK3B/PHKB/ACADM/WDR45/ATG2A/SELENOS/PPP1R3D/PPP1CA/WIPI1/STK40/GYG1/GABARAPL1/NPC1/RUBCNL	18
celltypes.CD4 T cell.down	celltypes	CD4 T cell	down	BP	GO:0046034	ATP metabolic process	42/2018	220/14457	0.190909	1.36768	2.2134	0.0202813	0.0924584	0.0686691	MT-ND4/MT-ND2/MT-ATP8/ATP5F1B/MT-ATP6/PPP2CA/MT-ND1/BLOC1S6/VCP/GAPDH/MT-ND5/UCP2/EP300/ADPGK/ZBTB20/TPI1/LDHA/LIPA/MT-ND6/PPARA/ARNT/HSPA1A/PGAM1/OGDH/NCOR1/PFKL/PARP1/EIF6/ZBTB7A/ATP6V0C/PFKP/NT5E/KAT2B/PRXL2C/PFKFB2/HIF1A/AK1/TGFB1/DHTKD1/NADK/ATP6V1A/ANTKMT	42
celltypes.CD4 T cell.down	celltypes	CD4 T cell	down	BP	GO:0007599	hemostasis	41/2018	214/14457	0.191589	1.37255	2.21146	0.0204715	0.0930991	0.0691451	BLOC1S6/FLI1/RAP2B/TMX1/AP3B1/WAS/JMJD1C/FIBP/MYH9/FERMT3/DGKD/TLN1/GNA13/ILK/F11R/JAK2/CD9/ITPK1/DTNBP1/PTPRJ/SH2B3/PRKCD/VCL/ANXA5/ANXA2/FLNA/PLSCR1/PIK3CG/GNA12/ENPP4/RAB27A/CLIC1/FCER1G/VAV3/HBB/F2R/CD40/PLCG2/PLEK/LYN/SYK	41
celltypes.CD4 T cell.down	celltypes	CD4 T cell	down	BP	GO:0050817	coagulation	40/2018	208/14457	0.192308	1.3777	2.20991	0.0206489	0.09383	0.0696879	BLOC1S6/RAP2B/TMX1/AP3B1/WAS/JMJD1C/FIBP/MYH9/FERMT3/DGKD/TLN1/GNA13/ILK/F11R/JAK2/CD9/ITPK1/DTNBP1/PTPRJ/SH2B3/PRKCD/VCL/ANXA5/ANXA2/FLNA/PLSCR1/PIK3CG/GNA12/ENPP4/RAB27A/CLIC1/FCER1G/VAV3/HBB/F2R/CD40/PLCG2/PLEK/LYN/SYK	40
celltypes.CD4 T cell.down	celltypes	CD4 T cell	down	BP	GO:0002347	response to tumor cell	12/2018	46/14457	0.26087	1.86888	2.37729	0.0212097	0.0960673	0.0713495	LAPTM5/HLA-A/HMGB1/TXNIP/CD226/MR1/TGFB1/NOTCH2/ABI3/PRF1/NKG7/HLA-DRB1	12
celltypes.CD4 T cell.down	celltypes	CD4 T cell	down	BP	GO:0030330	DNA damage response, signal transduction by p53 class mediator	12/2018	46/14457	0.26087	1.86888	2.37729	0.0212097	0.0960673	0.0713495	ATRX/NBN/MDM2/ZMPSTE24/PPM1D/FOXO3/SP100/SESN2/BCL3/PMAIP1/MYO6/CD74	12
celltypes.CD4 T cell.down	celltypes	CD4 T cell	down	BP	GO:0006109	regulation of carbohydrate metabolic process	33/2018	166/14457	0.198795	1.42417	2.2139	0.0213724	0.0967264	0.0718391	USP7/PPP2CA/CLTC/EP300/ADIPOR1/ZBTB20/AKT1/GSK3B/PPARA/ARNT/RORA/NCOR1/ACADM/NR3C1/ZMPSTE24/EIF6/ZBTB7A/SIRT7/SELENOS/PPP1R3D/KAT2B/PPP1CA/ARPP19/PRXL2C/NCOA2/HIF1A/TGFB1/MIDN/SESN2/PMAIP1/PLEK/RUBCNL/CD244	33
celltypes.CD4 T cell.down	celltypes	CD4 T cell	down	BP	GO:0141087	positive regulation of inflammasome-mediated signaling pathway	8/2018	26/14457	0.307692	2.20432	2.47554	0.0215556	0.0971643	0.0721643	PPP2CA/MAVS/NEK7/MYD88/GBP5/PTPN22/PLCG2/BTK	8
celltypes.CD4 T cell.down	celltypes	CD4 T cell	down	BP	GO:0014706	striated muscle tissue development	61/2018	340/14457	0.179412	1.28531	2.14426	0.0220475	0.0986698	0.0732824	HNRNPU/MYL6/NR1D2/EGLN1/MECP2/EP300/EMD/CTNNB1/PPARA/RHOA/SKI/MBD2/BTG2/ACADM/RBPJ/ZMPSTE24/AKAP13/SMAD3/SIRT2/DIPK2A/BCL2/SPG11/CFLAR/ABL1/HIVEP3/NF1/TGFB1/JARID2/SKIL/BMPR1A/SAP30/MEF2D/HEG1/RB1/MTPN/G6PD/MAFF/PRKAR1A/PPP3CA/ITGB1/NOTCH2/TGFBR1/SYNE1/SAV1/SMAD7/LMNA/ID2/FOS/YBX3/RGS2/SMAD5/TGFBR3/HOPX/NR4A1/EOMES/COL19A1/EGR1/MEF2C/DSP/DMD/PAX5	61
celltypes.CD4 T cell.down	celltypes	CD4 T cell	down	BP	GO:0031503	protein-containing complex localization	40/2018	209/14457	0.191388	1.37111	2.17663	0.0222006	0.0988047	0.0733826	KIF5B/GABARAP/XPO1/PPP3R1/AP3D1/DLG1/NUP88/AP2M1/AP2B1/CLSTN1/GRIPAP1/RABEP1/ADAM10/NUMB/AKAP9/NPTN/KIF3B/MDM2/SSX2IP/SCRIB/TRAF6/EIF6/RAB8A/IFT57/CBLB/DYNLL1/DYNC2H1/AKIRIN2/GPSM2/RALB/TTC21A/EPS15/SYNE1/EZR/SMAD7/DLG3/LMNA/STX7/HIP1/TYROBP	40
celltypes.CD4 T cell.down	celltypes	CD4 T cell	down	BP	GO:0034694	response to prostaglandin	9/2018	31/14457	0.290323	2.07988	2.42423	0.0222368	0.0988047	0.0733826	AKT1/GNB1/PTGER4/GNG2/PPP1R9B/PRKCE/PTGER2/TGFBR3/PTGDR	9
celltypes.CD4 T cell.down	celltypes	CD4 T cell	down	BP	GO:0090398	cellular senescence	21/2018	96/14457	0.21875	1.56713	2.24553	0.0225521	0.0998151	0.074133	MAP2K1/OPA1/KAT5/YPEL3/ZMPSTE24/AKT3/BCL6/ABL1/BMPR1A/MAP2K3/PRKCD/MAP3K5/SMC6/ZMIZ1/VASH1/CGAS/CDKN1A/LMNA/ID2/PAWR/ABI3	21
celltypes.CD4 T cell.down	celltypes	CD4 T cell	down	BP	GO:0010958	regulation of amino acid import across plasma membrane	6/2018	17/14457	0.352941	2.52848	2.53976	0.0229822	0.100375	0.074549	SEPTIN2/SLC38A1/ARL6IP1/ITGB1/RGS2/SLC43A2	6
celltypes.CD4 T cell.down	celltypes	CD4 T cell	down	BP	GO:0033631	cell-cell adhesion mediated by integrin	6/2018	17/14457	0.352941	2.52848	2.53976	0.0229822	0.100375	0.074549	ITGA4/FERMT3/PIEZO1/ITGB1/SWAP70/CCL5	6
celltypes.CD4 T cell.down	celltypes	CD4 T cell	down	BP	GO:1901096	regulation of autophagosome maturation	6/2018	17/14457	0.352941	2.52848	2.53976	0.0229822	0.100375	0.074549	ATG12/FYCO1/TBC1D25/UVRAG/RUBCN/ADRB2	6
celltypes.CD4 T cell.down	celltypes	CD4 T cell	down	BP	GO:0006006	glucose metabolic process	34/2018	173/14457	0.196532	1.40796	2.17423	0.02311	0.100621	0.0747312	USP7/GAPDH/EP300/ADIPOR1/ADPGK/H6PD/TPI1/AKT1/LIPA/PPARA/RORA/SLC25A11/PGAM1/ACADM/NR3C1/PFKL/ZMPSTE24/SIRT7/PFKP/SELENOS/WDTC1/HECTD4/KAT2B/PPP1CA/ARPP19/NCOA2/PFKFB2/INPPL1/CPT1A/FABP5/G6PD/SESN2/OAS1/PMAIP1	34
celltypes.CD4 T cell.down	celltypes	CD4 T cell	down	BP	GO:0001525	angiogenesis	82/2018	476/14457	0.172269	1.23414	2.09218	0.0236801	0.102864	0.0763975	STK4/ATP5F1B/JAK1/FBXW7/PPP3R1/EGLN1/MECP2/CIB1/VPS4B/CTNNB1/PDPK1/AKT1/QKI/RHOA/VEZF1/BTG1/RORA/RNF213/HDAC5/ROCK1/RBPJ/OTULIN/MYH9/JMJD6/PRKX/ADIPOR2/FMNL3/SETD2/AKT3/GRN/BSG/SLC12A2/PRCP/YWHAZ/HS6ST1/SP100/WARS1/GNA13/SRPK2/FOXO4/ZC3H12A/ABL1/HIF1A/NF1/TGFB1/EIF2AK3/SAT1/PTPRJ/BMPR1A/PTK2B/ATP2B4/PRKCB/ANXA1/TNFAIP3/ITGB1/VASH1/ANXA2/FLNA/NOTCH2/TGFBR1/PPP1R16B/GLUL/PIK3CG/B4GALT1/CXCR4/PLXND1…	82
celltypes.CD4 T cell.down	celltypes	CD4 T cell	down	BP	GO:0002437	inflammatory response to antigenic stimulus	15/2018	63/14457	0.238095	1.70572	2.26102	0.0244102	0.105627	0.0784496	PARK7/RBPJ/HMGB1/SELENOS/SPN/FURIN/NOTCH2/CD81/RHBDF2/FOSL2/FCGR3A/HLA-DRB1/BTK/LYN/SYK	15
celltypes.CD4 T cell.down	celltypes	CD4 T cell	down	BP	GO:0055117	regulation of cardiac muscle contraction	15/2018	63/14457	0.238095	1.70572	2.26102	0.0244102	0.105627	0.0784496	CALM2/DLG1/HSP90AA1/PDE4D/AKAP9/CAMK2D/ZC3H12A/TMEM38A/PDE4B/PIK3CG/SMAD7/RGS2/EHD3/DSP/DMD	15
celltypes.CD4 T cell.down	celltypes	CD4 T cell	down	BP	GO:0006090	pyruvate metabolic process	25/2018	120/14457	0.208333	1.4925	2.18205	0.0244898	0.105809	0.0785847	PPP2CA/GAPDH/UCP2/EP300/ADPGK/ZBTB20/TPI1/LDHA/LIPA/PPARA/ARNT/PGAM1/OGDH/NCOR1/VDAC1/PFKL/EIF6/ZBTB7A/PFKP/KAT2B/PRXL2C/PFKFB2/HIF1A/DHTKD1/SLC16A3	25
celltypes.CD4 T cell.down	celltypes	CD4 T cell	down	BP	GO:0010171	body morphogenesis	12/2018	47/14457	0.255319	1.82911	2.2931	0.0249727	0.107482	0.0798272	NIPBL/EP300/SSBP3/SKI/OFD1/BRAF/CSRNP1/TGFB1/SGPL1/CLASP1/ARID5B/PHLDB2	12
celltypes.CD4 T cell.down	celltypes	CD4 T cell	down	BP	GO:0006596	polyamine biosynthetic process	5/2018	13/14457	0.384615	2.75539	2.55032	0.0256728	0.108795	0.0808023	OAZ1/OAZ2/ODC1/SAT1/PAOX	5
celltypes.CD4 T cell.down	celltypes	CD4 T cell	down	BP	GO:0046761	viral budding from plasma membrane	5/2018	13/14457	0.384615	2.75539	2.55032	0.0256728	0.108795	0.0808023	CHMP4B/CHMP4A/VPS4B/CHMP1B/CHMP1A	5
celltypes.CD4 T cell.down	celltypes	CD4 T cell	down	BP	GO:0048070	regulation of developmental pigmentation	5/2018	13/14457	0.384615	2.75539	2.55032	0.0256728	0.108795	0.0808023	BLOC1S6/VPS33A/BCL2/BCL2L11/ZEB2	5
celltypes.CD4 T cell.down	celltypes	CD4 T cell	down	BP	GO:0071871	response to epinephrine	5/2018	13/14457	0.384615	2.75539	2.55032	0.0256728	0.108795	0.0808023	PDE4D/SIRT2/ABL1/ATP2B4/PDE4B	5
celltypes.CD4 T cell.down	celltypes	CD4 T cell	down	BP	GO:0010821	regulation of mitochondrion organization	24/2018	115/14457	0.208696	1.4951	2.14699	0.026603	0.111844	0.0830668	RALBP1/GHITM/HUWE1/VAT1/EP300/STAT2/AKT1/GSK3B/PRELID1/OPA1/GOLPH3/HSPA1A/MTCH2/ACAA2/CYRIB/SIRT7/SQSTM1/HIP1R/TFRC/BCL2L11/SLC25A4/LMNA/BMF/PMAIP1	24
celltypes.CD4 T cell.down	celltypes	CD4 T cell	down	BP	GO:0010453	regulation of cell fate commitment	10/2018	37/14457	0.27027	1.93622	2.29662	0.0268144	0.112144	0.0832894	BRD4/EP300/OPA1/RBBP7/BRD2/CD69/LGALS1/BMPR1A/LMO4/TBX21	10
celltypes.CD4 T cell.down	celltypes	CD4 T cell	down	BP	GO:0090504	epiboly	10/2018	37/14457	0.27027	1.93622	2.29662	0.0268144	0.112144	0.0832894	RHOA/ADAM17/MEGF8/CD151/CLASP1/ARHGAP35/ITGB1/FLNA/RHOC/PHLDB2	10
celltypes.CD4 T cell.down	celltypes	CD4 T cell	down	BP	GO:1990000	amyloid fibril formation	10/2018	37/14457	0.27027	1.93622	2.29662	0.0268144	0.112144	0.0832894	EMD/RIPK1/USP9X/VHL/MDM2/USP8/SIAH2/RIPK3/FURIN/GSN	10
celltypes.CD4 T cell.down	celltypes	CD4 T cell	down	BP	GO:0035456	response to interferon-beta	9/2018	32/14457	0.28125	2.01488	2.31486	0.0272162	0.112404	0.083483	HTRA2/IFI16/CAPN2/IRF1/OAS1/XAF1/BST2/PLSCR1/PYHIN1	9
celltypes.CD4 T cell.down	celltypes	CD4 T cell	down	BP	GO:0051642	centrosome localization	9/2018	32/14457	0.28125	2.01488	2.31486	0.0272162	0.112404	0.083483	KIF5B/SUN2/PAFAH1B1/DLG1/AKAP9/SYNE2/BICD2/GPSM2/EZR	9
celltypes.CD4 T cell.down	celltypes	CD4 T cell	down	BP	GO:0061842	microtubule organizing center localization	9/2018	32/14457	0.28125	2.01488	2.31486	0.0272162	0.112404	0.083483	KIF5B/SUN2/PAFAH1B1/DLG1/AKAP9/SYNE2/BICD2/GPSM2/EZR	9
celltypes.CD4 T cell.down	celltypes	CD4 T cell	down	BP	GO:0001706	endoderm formation	13/2018	53/14457	0.245283	1.75721	2.22437	0.0276205	0.113159	0.0840439	ITGA4/RTF1/PAF1/CTNNB1/MAP2K1/MYH9/GRB2/SETD2/DUSP1/DUSP2/DUSP5/DUSP4/EOMES	13
celltypes.CD4 T cell.down	celltypes	CD4 T cell	down	BP	GO:0006023	aminoglycan biosynthetic process	13/2018	53/14457	0.245283	1.75721	2.22437	0.0276205	0.113159	0.0840439	CLTC/CHPF2/HEXA/SLC35B2/CHSY1/TGFB1/CHST14/UGDH/B3GNT2/CHST11/B4GALT5/DSE/CHST12	13
celltypes.CD4 T cell.down	celltypes	CD4 T cell	down	BP	GO:0031529	ruffle organization	13/2018	53/14457	0.245283	1.75721	2.22437	0.0276205	0.113159	0.0840439	CORO1B/RAC1/ARF6/PLEKHM1/RDX/DEF8/INPPL1/TCIRG1/CORO1C/SNX10/ABI3/STAP1/PLEK	13
celltypes.CD4 T cell.down	celltypes	CD4 T cell	down	BP	GO:0001649	osteoblast differentiation	38/2018	200/14457	0.19	1.36116	2.07156	0.0280513	0.114757	0.0852305	HNRNPU/ATP5F1B/SNRNP200/CLTC/H3-3A/CTNNB1/AKT1/GSK3B/SKI/H3-3B/CAT/ALYREF/SIRT7/TPM4/SMAD3/JUND/RRBP1/HSD17B4/ILK/HIRA/NF1/ID3/RASSF2/BMPR1A/MEF2D/LIMD1/TCIRG1/PPP3CA/PTCH1/TENT5A/RRAS2/CLIC1/SMAD5/CRIM1/FOSL2/CEBPD/TMT1A/MEF2C	38
celltypes.CD4 T cell.down	celltypes	CD4 T cell	down	BP	GO:0048638	regulation of developmental growth	50/2018	275/14457	0.181818	1.30255	2.04026	0.0285308	0.116634	0.0866244	STK4/EIF4G2/NIPBL/ITSN2/MECP2/PAFAH1B1/TTL/AKT1/GOLGA4/GSK3B/PPARA/DNM2/RNF6/HTRA2/RBPJ/ZMPSTE24/TRPV2/MEGF8/BCL2/MACF1/ABL1/NEDD4L/JARID2/SASH3/WWC3/SGPL1/BMPR1A/BCL2L11/RUFY3/G6PD/PTCH1/TGFBR1/CDKN1A/EZR/LIMK1/SAV1/SMAD7/PLCB1/CXCR4/YBX3/P2RX5/DUSP10/RGS2/BCL11A/TGFBR3/FOSL2/HOPX/ADRB2/MEF2C/BASP1	50
celltypes.CD4 T cell.down	celltypes	CD4 T cell	down	BP	GO:0141084	inflammasome-mediated signaling pathway	12/2018	48/14457	0.25	1.79101	2.21093	0.0292016	0.118944	0.0883399	PPP2CA/MAVS/NEK7/MYD88/ABHD17A/SIRT2/EIF2AK2/IFI16/GBP5/PTPN22/PLCG2/BTK	12
celltypes.CD4 T cell.down	celltypes	CD4 T cell	down	BP	GO:0022406	membrane docking	19/2018	87/14457	0.218391	1.56456	2.12731	0.0294878	0.119722	0.0889177	VTI1B/USO1/BLOC1S6/EXOC5/VAMP8/STXBP2/STX8/SNX3/ROCK1/PDZD8/RAB8A/VPS18/MSN/CHP1/RALB/EZR/STX7/SYTL2/PLEK	19
celltypes.CD4 T cell.down	celltypes	CD4 T cell	down	BP	GO:0006406	mRNA export from nucleus	16/2018	70/14457	0.228571	1.63749	2.15343	0.0294991	0.119722	0.0889177	NEAT1/HNRNPA2B1/SMG1/PABPN1/XPO1/ALKBH5/NUP88/RBM8A/UPF2/FMR1/ALYREF/PCID2/FYTTD1/SETD2/NCBP3/HHEX	16
celltypes.CD4 T cell.down	celltypes	CD4 T cell	down	BP	GO:0032024	positive regulation of insulin secretion	16/2018	70/14457	0.228571	1.63749	2.15343	0.0294991	0.119722	0.0889177	ACSL4/ABAT/PFKFB2/HIF1A/JAK2/BAIAP3/ITPR1/PRKCB/NADK/PRKAR1A/CD38/PLCB1/PRKCE/GPR68/BLK/HLA-DRB1	16
celltypes.CD4 T cell.down	celltypes	CD4 T cell	down	BP	GO:0043500	muscle adaptation	20/2018	93/14457	0.215054	1.54065	2.10675	0.0302759	0.122432	0.0909308	STUB1/NFATC3/PPARA/ROCK1/PARP1/CAMK2D/KDM4A/SMAD3/FOXO3/CFLAR/JARID2/ATP2B4/MTPN/G6PD/PPP3CA/CYBA/TNFRSF1B/LMNA/RGS2/GSN	20
celltypes.CD4 T cell.down	celltypes	CD4 T cell	down	BP	GO:0060038	cardiac muscle cell proliferation	11/2018	43/14457	0.255814	1.83266	2.20242	0.0306883	0.123478	0.0917077	SKI/RBPJ/DIPK2A/ABL1/JARID2/BMPR1A/PRKAR1A/TGFBR1/SAV1/TGFBR3/MEF2C	11
celltypes.CD4 T cell.down	celltypes	CD4 T cell	down	BP	GO:0030032	lamellipodium assembly	15/2018	65/14457	0.230769	1.65324	2.12598	0.0317472	0.127102	0.0943989	RAC1/HSP90AA1/ARPC2/ACTR2/GOLPH3/PIK3R1/ACTR3/WAS/SRGAP2/VCL/ITGB1/ABI3/AUTS2/KIT/VAV3	15
celltypes.CD4 T cell.down	celltypes	CD4 T cell	down	BP	GO:0050769	positive regulation of neurogenesis	39/2018	208/14457	0.1875	1.34325	2.00839	0.0318214	0.127308	0.0945522	EIF4G2/NRDC/MECP2/PAFAH1B1/PPP1CC/CTNNB1/DICER1/MAP2K1/FMR1/GOLGA4/QKI/NUMB/NPTN/BRAF/MAP2K2/SPEN/LIG4/TRPV2/SLC30A1/ZNF335/MEGF8/MACF1/HIF1A/TGFB1/SKIL/RUFY3/EPHA4/PLXNC1/ITGB1/TNFRSF1B/LIMK1/CXCR4/ID2/PLXND1/TRAK1/BCL11A/KIT/CX3CR1/LYN	39
celltypes.CD4 T cell.down	celltypes	CD4 T cell	down	BP	GO:0010659	cardiac muscle cell apoptotic process	10/2018	38/14457	0.263158	1.88527	2.20086	0.0319821	0.127317	0.0945586	HSP90AA1/APAF1/PDPK1/PTPN1/CAMK2D/RGL2/CFLAR/JAK2/CAPN2/MAP3K5	10
celltypes.CD4 T cell.down	celltypes	CD4 T cell	down	BP	GO:0046677	response to antibiotic	10/2018	38/14457	0.263158	1.88527	2.20086	0.0319821	0.127317	0.0945586	JAK1/HSP90AA1/MDM2/CRIP1/EHMT1/JAK2/CYB5R4/SKIL/CIITA/MEF2C	10
celltypes.CD4 T cell.down	celltypes	CD4 T cell	down	BP	GO:0043467	regulation of generation of precursor metabolites and energy	26/2018	129/14457	0.20155	1.44391	2.03981	0.0324046	0.128816	0.0956724	PARK7/PPP2CA/GHITM/VCP/EP300/ZBTB20/AKT1/GSK3B/PPARA/PRELID1/RHOA/ARNT/NCOR1/RBPJ/EIF6/ZBTB7A/SELENOS/PPP1R3D/KAT2B/PPP1CA/PRXL2C/SHMT2/HIF1A/OAS1/CXXC5/RUBCNL	26
celltypes.CD4 T cell.down	celltypes	CD4 T cell	down	BP	GO:0055074	calcium ion homeostasis	49/2018	271/14457	0.180812	1.29534	1.97683	0.0326864	0.129329	0.096053	CALM2/TMBIM6/GHITM/SELENOK/MICU2/DIAPH1/PDPK1/PDE4D/TMCO1/ITPR2/NPTN/HTT/CAMK2D/KCTD17/PDZD8/STIM2/ANXA6/TMEM165/NT5E/RMDN3/SLC30A1/BCL2/ABL1/TGFB1/PTK2B/TMEM38A/ITPR1/ATP2B4/ATP2B1/PRKCB/TCIRG1/ATP2A3/FLNA/CYBA/PLCB1/HERPUD1/SNX10/PRKCE/CXCR3/CCL5/F2R/CD40/CCR5/FASLG/PLCG2/CD19/XCL1/LYN/DMD	49
celltypes.CD4 T cell.down	celltypes	CD4 T cell	down	BP	GO:0033622	integrin activation	7/2018	23/14457	0.304348	2.18036	2.28179	0.0326946	0.129329	0.096053	RAP1B/FERMT3/TLN1/FARP2/PTGER4/PIEZO1/PLEK	7
celltypes.CD4 T cell.down	celltypes	CD4 T cell	down	BP	GO:0101023	vascular endothelial cell proliferation	7/2018	23/14457	0.304348	2.18036	2.28179	0.0326946	0.129329	0.096053	ITGA4/PDPK1/HMGB1/ADAM17/AKT3/TGFBR1/MEF2C	7
celltypes.CD4 T cell.down	celltypes	CD4 T cell	down	BP	GO:0006516	glycoprotein catabolic process	9/2018	33/14457	0.272727	1.95382	2.2094	0.0329307	0.129806	0.0964074	GNS/OGA/EDEM2/HEXA/MANBA/HGSNAT/IDS/MAN1A1/BTK	9
celltypes.CD4 T cell.down	celltypes	CD4 T cell	down	BP	GO:0032350	regulation of hormone metabolic process	9/2018	33/14457	0.272727	1.95382	2.2094	0.0329307	0.129806	0.0964074	STUB1/H6PD/ARNT/NR3C1/ZMPSTE24/HIF1A/RDH10/GFI1/EGR1	9
celltypes.CD4 T cell.down	celltypes	CD4 T cell	down	BP	GO:0031579	membrane raft organization	8/2018	28/14457	0.285714	2.04686	2.23328	0.0332955	0.130953	0.0972591	DLG1/DOCK2/ILK/RFTN1/ANXA2/IQGAP1/NPC1/GSN	8
celltypes.CD4 T cell.down	celltypes	CD4 T cell	down	BP	GO:0007346	regulation of mitotic cell cycle	80/2018	471/14457	0.169851	1.21682	1.92688	0.0339421	0.132676	0.0985392	HNRNPU/PRP4K/BRD4/APC/PPP2CA/TAOK3/ZFP36L2/KIF20B/PAFAH1B1/DLG1/VPS4B/SMARCD2/CTNNB1/TTL/RAD9A/DPF2/AKT1/CDC27/FBXW5/INO80/CUL3/SMARCE1/MDC1/NEK7/NBN/ARID1B/CDK5RAP2/KMT2E/MDM2/NME6/DAPK3/PSME1/FBXO7/SCRIB/TAOK2/ADAM17/ZMPSTE24/PCID2/CPAP/APPL1/DYNC1LI1/SIRT2/TCF3/PSME3/CDKN2D/ZWILCH/BARD1/DUSP1/MAD2L2/BCL2/FOXO4/BCL6/BLM/ABL1/CTDSP1/NABP2/LSM10/RDX/TGFB1/MNAT1/NHERF1/ZFP36L1/SMARCB1/RRM2B/RB1/KL…	80
celltypes.CD4 T cell.down	celltypes	CD4 T cell	down	BP	GO:0031099	regeneration	32/2018	166/14457	0.192771	1.38102	1.98865	0.0343725	0.134079	0.099581	MT-CYB/UCP2/KPNA1/UPF2/MAP2K1/BRAF/MAP2K2/IGF2R/GRN/BCL2/LCP1/CFLAR/JAK2/CD9/TGFB1/NEO1/GUCD1/CPT1A/MTPN/EPHA4/ANXA1/PPP3CA/PTCH1/FLNA/CD81/CDKN1A/PTPN12/CTNNA1/P2RX5/DUSP10/TGFBR3/HOPX	32
celltypes.CD4 T cell.down	celltypes	CD4 T cell	down	BP	GO:0033045	regulation of sister chromatid segregation	22/2018	106/14457	0.207547	1.48687	2.02637	0.0346036	0.134388	0.0998103	HNRNPU/PRP4K/APC/SMARCD2/DPF2/CDC27/CUL3/SMARCE1/KAT5/ARID1B/CDK5RAP2/PCID2/DYNC1LI1/KAT2B/ZWILCH/DUSP1/MAD2L2/SMARCB1/RB1/BCL7A/GEN1/MAP3K20	22
celltypes.CD4 T cell.down	celltypes	CD4 T cell	down	BP	GO:0062012	regulation of small molecule metabolic process	52/2018	291/14457	0.178694	1.28017	1.94462	0.034619	0.134388	0.0998103	PARK7/USP7/PPP2CA/VCP/KPNB1/EP300/UBR4/ADIPOR1/ZBTB20/H6PD/PPTC7/AKT1/PPARA/QKI/ARNT/RORA/NCOR1/ACADM/NR3C1/ZMPSTE24/PARP1/EIF6/ZBTB7A/SIRT7/SELENOS/SIRT2/WDTC1/KAT2B/PPP1CA/ARPP19/PRXL2C/ACADVL/NCOA2/STARD4/HIF1A/CPT1A/ATP2B4/FABP5/RDH10/SESN2/MAPK1/GFI1/ANTKMT/LACC1/CHLSN/PMAIP1/LPGAT1/KIT/CD74/EGR1/PLEK/CD244	52
celltypes.CD4 T cell.down	celltypes	CD4 T cell	down	BP	GO:0007028	cytoplasm organization	5/2018	14/14457	0.357143	2.55858	2.34994	0.0354499	0.135369	0.100539	KIF5B/ETV6/SOS1/TDRD7/ZMIZ1	5
celltypes.CD4 T cell.down	celltypes	CD4 T cell	down	BP	GO:0051645	Golgi localization	5/2018	14/14457	0.357143	2.55858	2.34994	0.0354499	0.135369	0.100539	HOOK3/YWHAZ/UVRAG/NHERF1/RIPOR1	5
celltypes.CD4 T cell.down	celltypes	CD4 T cell	down	BP	GO:0120305	regulation of pigmentation	5/2018	14/14457	0.357143	2.55858	2.34994	0.0354499	0.135369	0.100539	BLOC1S6/VPS33A/BCL2/BCL2L11/ZEB2	5
celltypes.CD4 T cell.down	celltypes	CD4 T cell	down	BP	GO:0140718	facultative heterochromatin formation	5/2018	14/14457	0.357143	2.55858	2.34994	0.0354499	0.135369	0.100539	KDM5A/BAZ2A/SIRT2/EHMT1/JARID2	5
celltypes.CD4 T cell.down	celltypes	CD4 T cell	down	BP	GO:0141161	regulation of cAMP/PKA signal transduction	5/2018	14/14457	0.357143	2.55858	2.34994	0.0354499	0.135369	0.100539	PRKAR2A/PRKAR2B/PRKAR1A/PDE4A/ADRB2	5
celltypes.CD4 T cell.down	celltypes	CD4 T cell	down	BP	GO:1905153	regulation of membrane invagination	5/2018	14/14457	0.357143	2.55858	2.34994	0.0354499	0.135369	0.100539	NCKAP1L/STAP1/CD300A/PLCG2/RAB31	5
celltypes.CD4 T cell.down	celltypes	CD4 T cell	down	BP	GO:1905564	positive regulation of vascular endothelial cell proliferation	5/2018	14/14457	0.357143	2.55858	2.34994	0.0354499	0.135369	0.100539	ITGA4/PDPK1/HMGB1/ADAM17/AKT3	5
celltypes.CD4 T cell.down	celltypes	CD4 T cell	down	BP	GO:2001140	positive regulation of phospholipid transport	5/2018	14/14457	0.357143	2.55858	2.34994	0.0354499	0.135369	0.100539	TMEM30A/PRELID1/DBI/ATP8A1/FASLG	5
celltypes.CD4 T cell.down	celltypes	CD4 T cell	down	BP	GO:0140632	canonical inflammasome complex assembly	11/2018	44/14457	0.25	1.79101	2.11651	0.0359298	0.136972	0.10173	PPP2CA/MAVS/NEK7/MYD88/ABHD17A/SIRT2/EIF2AK2/GBP5/PTPN22/PLCG2/BTK	11
celltypes.CD4 T cell.down	celltypes	CD4 T cell	down	BP	GO:0006091	generation of precursor metabolites and energy	75/2018	440/14457	0.170455	1.22114	1.8974	0.0363666	0.138306	0.10272	MT-CYB/MT-ND4/MT-ND2/MT-ATP8/ATP5F1B/MT-CO2/MT-ATP6/PARK7/PPP2CA/GHITM/MT-ND1/ATG12/RB1CC1/VCP/GAPDH/MT-ND5/UCP2/EP300/PPP1CC/ADPGK/ZBTB20/H6PD/CYC1/TPI1/LDHA/MT-CO1/MFN2/AKT1/LIPA/GSK3B/MT-ND6/PPARA/PRELID1/RHOA/ARNT/PHKB/ETFA/PGAM1/OGDH/CAT/NCOR1/ACADM/WDR45/COX17/RBPJ/PFKL/FECH/ATG2A/EIF6/ZBTB7A/BLOC1S1/PFKP/SELENOS/PPP1R3D/HCCS/KAT2B/PPP1CA/PRXL2C/ACADVL/PFKFB2/SHMT2/HIF1A/DHTKD1/WIPI1/IDH2/S…	75
celltypes.CD4 T cell.down	celltypes	CD4 T cell	down	BP	GO:0003229	ventricular cardiac muscle tissue development	13/2018	55/14457	0.236364	1.69331	2.07488	0.0366006	0.138914	0.103172	MECP2/MBD2/RBPJ/ZMPSTE24/TGFB1/BMPR1A/HEG1/TGFBR1/SMAD7/ID2/TGFBR3/HOPX/DSP	13
celltypes.CD4 T cell.down	celltypes	CD4 T cell	down	BP	GO:0048144	fibroblast proliferation	21/2018	101/14457	0.207921	1.48955	1.98853	0.0376589	0.142642	0.105941	FTH1/EMD/CTNNB1/BMI1/SKI/ZMPSTE24/LIG4/MED25/ABL1/NF1/TGFB1/GNG2/GSTP1/TP53INP1/ZMIZ1/CDKN1A/PAWR/FOSL2/IFI30/CD74/CD300A	21
celltypes.CD4 T cell.down	celltypes	CD4 T cell	down	BP	GO:1902692	regulation of neuroblast proliferation	9/2018	34/14457	0.264706	1.89636	2.10759	0.0394232	0.144074	0.107004	CTNNB1/BTG2/ZNF335/HIF1A/NF1/TGFB1/ITGB1/CTNNA1/CX3CR1	9
celltypes.CD4 T cell.down	celltypes	CD4 T cell	down	BP	GO:0006541	glutamine metabolic process	6/2018	19/14457	0.315789	2.26232	2.21761	0.0394613	0.144074	0.107004	SLC38A1/BLOC1S6/MECP2/UCP2/ASL/GLUL	6
celltypes.CD4 T cell.down	celltypes	CD4 T cell	down	BP	GO:0071800	podosome assembly	6/2018	19/14457	0.315789	2.26232	2.21761	0.0394613	0.144074	0.107004	DBNL/RHOA/FARP2/LCP1/MSN/GSN	6
celltypes.CD4 T cell.down	celltypes	CD4 T cell	down	BP	GO:1902004	positive regulation of amyloid-beta formation	6/2018	19/14457	0.315789	2.26232	2.21761	0.0394613	0.144074	0.107004	CASP3/IFNGR1/EPHA4/PICALM/ABCA2/GSAP	6
celltypes.CD4 T cell.down	celltypes	CD4 T cell	down	BP	GO:0001821	histamine secretion	4/2018	10/14457	0.4	2.86561	2.37697	0.0395237	0.144074	0.107004	VAMP8/SNAP23/BTK/LYN	4
celltypes.CD4 T cell.down	celltypes	CD4 T cell	down	BP	GO:0006868	glutamine transport	4/2018	10/14457	0.4	2.86561	2.37697	0.0395237	0.144074	0.107004	SLC38A1/SLC38A5/SLC1A5/SLC1A4	4
celltypes.CD4 T cell.down	celltypes	CD4 T cell	down	BP	GO:0007175	negative regulation of epidermal growth factor-activated receptor activity	4/2018	10/14457	0.4	2.86561	2.37697	0.0395237	0.144074	0.107004	SOCS4/TSG101/SOCS5/ZFYVE28	4
celltypes.CD4 T cell.down	celltypes	CD4 T cell	down	BP	GO:0015911	long-chain fatty acid import across plasma membrane	4/2018	10/14457	0.4	2.86561	2.37697	0.0395237	0.144074	0.107004	AKT1/ACSL1/ACSL5/SLC2A1	4
celltypes.CD4 T cell.down	celltypes	CD4 T cell	down	BP	GO:0035646	endosome to melanosome transport	4/2018	10/14457	0.4	2.86561	2.37697	0.0395237	0.144074	0.107004	BLOC1S6/AP3D1/AP1G1/CD63	4
celltypes.CD4 T cell.down	celltypes	CD4 T cell	down	BP	GO:0044828	negative regulation by host of viral genome replication	4/2018	10/14457	0.4	2.86561	2.37697	0.0395237	0.144074	0.107004	ZBED1/ZC3H12A/SMC6/APOBEC3H	4
celltypes.CD4 T cell.down	celltypes	CD4 T cell	down	BP	GO:0061043	regulation of vascular wound healing	4/2018	10/14457	0.4	2.86561	2.37697	0.0395237	0.144074	0.107004	SLC12A2/TNFAIP3/CXCR4/ALOX5	4
celltypes.CD4 T cell.down	celltypes	CD4 T cell	down	BP	GO:0097011	cellular response to granulocyte macrophage colony-stimulating factor stimulus	4/2018	10/14457	0.4	2.86561	2.37697	0.0395237	0.144074	0.107004	ZFP36L2/ETV3/AKT1/ZFP36	4
celltypes.CD4 T cell.down	celltypes	CD4 T cell	down	BP	GO:0097012	response to granulocyte macrophage colony-stimulating factor	4/2018	10/14457	0.4	2.86561	2.37697	0.0395237	0.144074	0.107004	ZFP36L2/ETV3/AKT1/ZFP36	4
celltypes.CD4 T cell.down	celltypes	CD4 T cell	down	BP	GO:0009119	ribonucleoside metabolic process	8/2018	29/14457	0.275862	1.97628	2.11965	0.0405365	0.147177	0.109309	BLOC1S6/NT5C2/ICMT/NT5E/ENPP4/APOBEC3C/APOBEC3G/PTGDR	8
celltypes.CD4 T cell.down	celltypes	CD4 T cell	down	BP	GO:1990845	adaptive thermogenesis	30/2018	156/14457	0.192308	1.3777	1.91036	0.0406277	0.147177	0.109309	HNRNPU/APC/NRDC/UCP2/ADIPOR1/TLE3/STAT6/MFN2/LIPA/QKI/DYNC1H1/RBPJ/ADAM17/TRPV2/ADIPOR2/ARRDC3/EHMT1/ACSL1/JAK2/IL4R/ABHD6/RB1/FABP5/SLC25A4/CLSTN3/CXCR4/IL18R1/IRF4/ADRB2/SYK	30
celltypes.CD4 T cell.down	celltypes	CD4 T cell	down	BP	GO:0051457	maintenance of protein location in nucleus	7/2018	24/14457	0.291667	2.08951	2.15154	0.0407677	0.147177	0.109309	HNRNPU/PARK7/SUN2/FAM76B/BARD1/SP100/SYNE1	7
celltypes.CD4 T cell.down	celltypes	CD4 T cell	down	BP	GO:0090594	inflammatory response to wounding	7/2018	24/14457	0.291667	2.08951	2.15154	0.0407677	0.147177	0.109309	WDR83/GRN/HIF1A/TGFB1/EXTL3/F2R/ALOX5	7
celltypes.CD4 T cell.down	celltypes	CD4 T cell	down	BP	GO:0051983	regulation of chromosome segregation	26/2018	132/14457	0.19697	1.4111	1.91106	0.0417122	0.14935	0.110923	HNRNPU/PRP4K/APC/CSNK2A1/SMARCD2/DPF2/CDC27/CUL3/SMARCE1/KAT5/ARID1B/CDK5RAP2/PCID2/DYNC1LI1/SIRT2/KAT2B/ZWILCH/DUSP1/MAD2L2/SMARCB1/RB1/SMC6/PLSCR1/BCL7A/GEN1/MAP3K20	26
celltypes.CD4 T cell.down	celltypes	CD4 T cell	down	BP	GO:0006509	membrane protein ectodomain proteolysis	11/2018	45/14457	0.244444	1.75121	2.0328	0.0417683	0.14935	0.110923	NRDC/ADAM10/SPPL2B/ROCK1/ADAM17/MYH9/SPPL2A/FURIN/TNFRSF1B/ADAM19/ADAM8	11
celltypes.CD4 T cell.down	celltypes	CD4 T cell	down	BP	GO:0006623	protein targeting to vacuole	11/2018	45/14457	0.244444	1.75121	2.0328	0.0417683	0.14935	0.110923	AP3D1/VPS13C/LAPTM5/M6PR/MON1B/AP3B1/VPS41/ZFYVE16/SQSTM1/GNPTAB/VPS37B	11
celltypes.CD4 T cell.down	celltypes	CD4 T cell	down	BP	GO:0002793	positive regulation of peptide secretion	18/2018	85/14457	0.211765	1.51709	1.92578	0.0440096	0.155976	0.115844	RAB8B/ACSL4/SELENOT/ABAT/PFKFB2/HIF1A/JAK2/BAIAP3/ITPR1/PRKCB/NADK/PRKAR1A/CD38/PLCB1/PRKCE/GPR68/BLK/HLA-DRB1	18
celltypes.CD4 T cell.down	celltypes	CD4 T cell	down	BP	GO:0043331	response to dsRNA	10/2018	40/14457	0.25	1.79101	2.01774	0.0443323	0.156626	0.116327	MAVS/RIGI/RIOK3/IFIH1/RFTN1/RALB/MAPK1/RIPK2/CGAS/PMAIP1	10
celltypes.CD4 T cell.down	celltypes	CD4 T cell	down	BP	GO:0042752	regulation of circadian rhythm	20/2018	97/14457	0.206186	1.47712	1.89901	0.0451273	0.158935	0.118042	USP7/FBXW7/THRAP3/NR1D2/CSNK1D/PPP1CC/USP9X/GSK3B/PPARA/KAT5/RORA/FBXW11/PARP1/SIAH2/PPP1CA/KLF10/CIPC/TIMELESS/ID2/BHLHE40	20
celltypes.CD4 T cell.down	celltypes	CD4 T cell	down	BP	GO:0019693	ribose phosphate metabolic process	61/2018	354/14457	0.172316	1.23448	1.79904	0.0454674	0.159733	0.118634	MT-ND4/MT-ND2/MT-ATP8/ATP5F1B/MT-ATP6/PPP2CA/MT-ND1/BLOC1S6/GNAI3/VCP/GAPDH/MT-ND5/UCP2/EP300/DLG1/NUDT3/ADPGK/ZBTB20/TPI1/LDHA/NT5C2/GUK1/PDE4D/LIPA/MT-ND6/PPARA/OPA1/ARNT/RORA/MFN1/HSPA1A/GTPBP1/NME6/PGAM1/OGDH/NCOR1/PFKL/PARP1/EIF6/ZBTB7A/ADCY7/ATP6V0C/PFKP/NT5E/KAT2B/PRXL2C/CARD11/PFKFB2/HIF1A/AK1/TGFB1/DHTKD1/NT5C/G6PD/NADK/ATP6V1A/PDE4B/ANTKMT/TPST2/RHOQ/PDE4A	61
celltypes.CD4 T cell.down	celltypes	CD4 T cell	down	BP	GO:0003281	ventricular septum development	15/2018	68/14457	0.220588	1.5803	1.93189	0.0455947	0.159973	0.118812	HECTD1/EGLN1/AP2B1/NSD2/MDM2/RBPJ/LUZP1/BMPR1A/LMO4/HEG1/TGFBR1/SAV1/SMAD7/PRDM1/TGFBR3	15
celltypes.CD4 T cell.down	celltypes	CD4 T cell	down	BP	GO:0019827	stem cell population maintenance	32/2018	170/14457	0.188235	1.34852	1.8411	0.045916	0.160806	0.119431	SMC3/ZC3H13/HOOK3/DDX6/RTF1/NIPBL/ZFP36L2/ELAVL1/PAF1/CTNNB1/DPF2/SKI/SMARCE1/MCPH1/RBBP7/BRAF/RBPJ/LIG4/EIF4ENIF1/NCOA3/SUDS3/FOXO3/ZHX2/KDM2B/KLF10/BMPR1A/SAP30/SMARCB1/SAV1/BCL7A/KIT/EOMES	32
celltypes.CD4 T cell.down	celltypes	CD4 T cell	down	BP	GO:0097194	execution phase of apoptosis	16/2018	74/14457	0.216216	1.54898	1.90694	0.0469137	0.163473	0.121412	RIPK1/APAF1/DICER1/AKT1/MADD/CASP3/HTRA2/DNASE2/KDM4A/SIRT2/CTSD/ZC3H12A/CASP7/PLSCR1/CXCR3/FASLG	16
celltypes.CD4 T cell.down	celltypes	CD4 T cell	down	BP	GO:0055119	relaxation of cardiac muscle	5/2018	15/14457	0.333333	2.38801	2.16629	0.04723	0.163473	0.121412	PDE4D/CAMK2D/PDE4B/RGS2/GSN	5
celltypes.CD4 T cell.down	celltypes	CD4 T cell	down	BP	GO:0071071	regulation of phospholipid biosynthetic process	5/2018	15/14457	0.333333	2.38801	2.16629	0.04723	0.163473	0.121412	SCP2/CHP1/CAPN2/ABCA2/LPCAT1	5
celltypes.CD4 T cell.down	celltypes	CD4 T cell	down	BP	GO:0090235	regulation of metaphase plate congression	5/2018	15/14457	0.333333	2.38801	2.16629	0.04723	0.163473	0.121412	HNRNPU/TTL/DYNC1H1/KAT5/KAT2B	5
celltypes.CD4 T cell.down	celltypes	CD4 T cell	down	BP	GO:1903140	regulation of establishment of endothelial barrier	5/2018	15/14457	0.333333	2.38801	2.16629	0.04723	0.163473	0.121412	ROCK1/ADD1/F11R/VCL/PLCB1	5
celltypes.CD4 T cell.down	celltypes	CD4 T cell	down	BP	GO:0140719	constitutive heterochromatin formation	13/2018	57/14457	0.22807	1.6339	1.93139	0.0474849	0.164052	0.121842	XIST/ATF7IP/RESF1/H3-3A/TASOR/ATRX/BAZ2A/BMI1/H3-3B/MBD2/PPM1D/SIRT2/EHMT1	13
celltypes.CD4 T cell.down	celltypes	CD4 T cell	down	BP	GO:0060324	face development	11/2018	46/14457	0.23913	1.71314	1.95117	0.0482295	0.166114	0.123374	NIPBL/EP300/MAP2K1/SKI/BRAF/MAP2K2/CSRNP1/TGFB1/SGPL1/MAPK1/ARID5B	11
celltypes.CD4 T cell.down	celltypes	CD4 T cell	down	BP	GO:1905952	regulation of lipid localization	27/2018	140/14457	0.192857	1.38163	1.82758	0.0485366	0.167069	0.124083	TMEM30A/AKT1/PPARA/PRELID1/DBI/TMF1/SURF4/SCP2/ATP8A1/PLIN3/EHD1/REPIN1/OSBPL11/ACSL4/ACSL1/ZC3H12A/PRKCD/PTCH1/FURIN/ANXA2/ACSL5/ABCA2/CLSTN3/RXRA/FASLG/DENND5B/SYK	27
celltypes.CD4 T cell.down	celltypes	CD4 T cell	down	BP	GO:0000002	mitochondrial genome maintenance	8/2018	30/14457	0.266667	1.91041	2.01048	0.0487518	0.167298	0.124253	POLG/OPA1/PARP1/AKT3/MGME1/RRM2B/SLC25A4/SESN2	8
celltypes.CD4 T cell.down	celltypes	CD4 T cell	down	BP	GO:0010212	response to ionizing radiation	26/2018	134/14457	0.19403	1.39003	1.82697	0.0489304	0.1674	0.124328	NIPBL/MECP2/RAD9A/INO80/KAT5/CASP3/MDM2/DCLRE1C/TMEM109/ZMPSTE24/GRB2/LIG4/PARP1/BARD1/TANK/BCL2/BLM/NABP2/TGFB1/IFI16/SPIDR/CDKN1A/USP28/RHOB/MAP3K20/EGR1	26
celltypes.CD4 T cell.down	celltypes	CD4 T cell	down	BP	GO:0032411	positive regulation of transporter activity	14/2018	63/14457	0.222222	1.59201	1.89669	0.0494826	0.168704	0.125297	CALM2/AKAP9/HTT/COX17/STIM2/ATP1B3/TCAF1/CHP1/STK39/PRKCD/CTSS/ACTN4/RXRA/DMD	14
celltypes.CD4 T cell.down	celltypes	CD4 T cell	down	BP	GO:0034103	regulation of tissue remodeling	14/2018	63/14457	0.222222	1.59201	1.89669	0.0494826	0.168704	0.125297	CSK/ROCK1/BCR/TFRC/PLEKHM1/NF1/TGFB1/DEF8/TNFAIP3/PPP3CA/CD38/INPP5D/ADAM8/SYK	14
celltypes.CD4 T cell.down	celltypes	CD4 T cell	down	BP	GO:0070301	cellular response to hydrogen peroxide	14/2018	63/14457	0.222222	1.59201	1.89669	0.0494826	0.168704	0.125297	PARK7/RIPK1/STAT6/MDM2/SETX/CAT/ABL1/RIPK3/ERN1/PRKCD/MAP3K5/TNFAIP3/RHOB/IL18RAP	14
celltypes.CD4 T cell.down	celltypes	CD4 T cell	down	BP	GO:0030048	actin filament-based movement	24/2018	122/14457	0.196721	1.40932	1.82866	0.0495207	0.168704	0.125297	SUN2/MYL6/DLG1/PDE4D/QKI/AKAP9/ROCK1/WAS/MYH9/CAMK2D/SYNE2/WIPF1/NEDD4L/MYO9B/MYO5A/LUZP1/PDE4B/FLNA/MYO1G/ACTN4/MYO6/GSN/ZEB2/DSP	24
celltypes.CD4 T cell.down	celltypes	CD4 T cell	down	BP	GO:0006972	hyperosmotic response	7/2018	25/14457	0.28	2.00593	2.02752	0.050032	0.168704	0.125297	NFAT5/PDPK1/SLC12A2/STK39/RCSD1/SLC2A1/YBX3	7
celltypes.CD4 T cell.down	celltypes	CD4 T cell	down	BP	GO:0048208	COPII vesicle coating	7/2018	25/14457	0.28	2.00593	2.02752	0.050032	0.168704	0.125297	SAR1A/CSNK1D/TMED10/TRAPPC8/TRAPPC1/CUL3/TRAPPC2	7
celltypes.CD4 T cell.down	celltypes	CD4 T cell	down	BP	GO:0150105	protein localization to cell-cell junction	7/2018	25/14457	0.28	2.00593	2.02752	0.050032	0.168704	0.125297	JAK1/SCRIB/ZDHHC7/F11R/VCL/FLNA/DSP	7
celltypes.CD4 T cell.down	celltypes	CD4 T cell	down	BP	GO:0009895	negative regulation of catabolic process	57/2018	331/14457	0.172205	1.23368	1.73231	0.0521961	0.175056	0.130015	HNRNPU/HNRNPA0/EIF4G2/PARK7/USP7/PPP2CA/ZCCHC17/THRAP3/GOLGA2/ELAVL1/EP300/CSNK2A1/VPS13C/RBM38/PSME3IP1/HERC1/FAM76B/USP9X/RRAGC/AKT1/PPARA/QKI/ZFP36/VHL/HTRA2/SNX3/ROCK1/NCOR1/MTMR9/EIF4ENIF1/KDM4A/MYD88/USP8/RGP1/SMAD3/SIRT2/RNF41/ZDHHC7/MAD2L2/BCL2/CTSA/MAPKAPK2/FEZ2/ATP2B4/QSOX1/FURIN/ANXA2/FLNA/IL10RA/RUBCN/PIK3CG/TENT5A/BMF/NPC1/YBX3/PTPN22/TENT5C	57
celltypes.CD4 T cell.down	celltypes	CD4 T cell	down	BP	GO:0021700	developmental maturation	52/2018	299/14457	0.173913	1.24592	1.73067	0.0529254	0.177396	0.131753	PTBP3/BLOC1S6/ATP6V1E1/AP3D1/MECP2/H3-3A/ATP6AP1/TUSC2/CTNNB1/CLSTN1/AP1G1/L3MBTL3/RHOA/CLCN3/ATP6V1D/H3-3B/SCLT1/DLGAP4/ROCK1/RBPJ/ZBTB7A/ATP6V0C/SIRT2/FOXO3/TUT7/YWHAZ/FARP2/REC8/BCL2/HIF1A/NF1/TDRD7/TGFB1/ABHD2/ATP6V0D1/PTK2B/BAIAP3/RB1/G6PD/PICALM/ATP6V1A/B4GALT5/CDKN1A/NR4A2/CCR6/ZBTB16/SNX10/P2RX5/CD63/BCL11A/CX3CR1/BTK	52
celltypes.CD4 T cell.down	celltypes	CD4 T cell	down	BP	GO:0010876	lipid localization	65/2018	384/14457	0.169271	1.21266	1.70118	0.0546208	0.180256	0.133877	TMEM30A/UCP2/VPS13C/VPS4B/APOL6/AKT1/LIPA/PPARA/PRELID1/LRP10/DBI/TMF1/SLC25A11/NPC2/CERT1/VDAC1/SGPP1/SURF4/ATG2A/PDZD8/SCP2/PIP4K2A/PNPLA8/ATP8A1/PLIN3/EHD1/REPIN1/OSBPL11/SLC10A3/ACSL4/ACSL1/PSAP/SPG11/ZC3H12A/STARD7/OSBPL3/STARD4/GLTP/PITPNA/APOL2/SLC25A20/CPT1A/PRKCD/STARD3NL/FABP5/APOL1/ANXA1/PTCH1/FURIN/ANXA2/PLSCR1/ACSL5/ABCA2/CLSTN3/RXRA/SLC2A1/ABCB1/NPC1/GM2A/APOBR/ATP10D/FASLG/LYN/DENN…	65
celltypes.CD4 T cell.down	celltypes	CD4 T cell	down	BP	GO:0042304	regulation of fatty acid biosynthetic process	9/2018	36/14457	0.25	1.79101	1.91393	0.0548841	0.180256	0.133877	UBR4/EIF6/SIRT2/WDTC1/KAT2B/ACADVL/FABP5/LPGAT1/CD74	9
celltypes.CD4 T cell.down	celltypes	CD4 T cell	down	BP	GO:0045191	regulation of isotype switching	9/2018	36/14457	0.25	1.79101	1.91393	0.0548841	0.180256	0.133877	STAT6/NSD2/MAD2L2/BCL6/TFRC/TGFB1/SLC15A4/CD40/TBX21	9
celltypes.CD4 T cell.down	celltypes	CD4 T cell	down	BP	GO:0010988	regulation of low-density lipoprotein particle clearance	4/2018	11/14457	0.363636	2.6051	2.14495	0.0554139	0.180256	0.133877	HNRNPK/CSK/ANXA2/MYLIP	4
celltypes.CD4 T cell.down	celltypes	CD4 T cell	down	BP	GO:0032957	inositol trisphosphate metabolic process	4/2018	11/14457	0.363636	2.6051	2.14495	0.0554139	0.180256	0.133877	SCP2/ITPK1/PLCB1/PLCG2	4
celltypes.CD4 T cell.down	celltypes	CD4 T cell	down	BP	GO:0043312	neutrophil degranulation	4/2018	11/14457	0.363636	2.6051	2.14495	0.0554139	0.180256	0.133877	STXBP2/BCR/ITGAM/SYK	4
celltypes.CD4 T cell.down	celltypes	CD4 T cell	down	BP	GO:0051987	positive regulation of attachment of spindle microtubules to kinetochore	4/2018	11/14457	0.363636	2.6051	2.14495	0.0554139	0.180256	0.133877	HNRNPU/KAT5/SIRT2/KAT2B	4
celltypes.CD4 T cell.down	celltypes	CD4 T cell	down	BP	GO:0070672	response to interleukin-15	4/2018	11/14457	0.363636	2.6051	2.14495	0.0554139	0.180256	0.133877	JAK1/IL2RG/PLCB1/IL2RB	4
celltypes.CD4 T cell.down	celltypes	CD4 T cell	down	BP	GO:0071349	cellular response to interleukin-12	4/2018	11/14457	0.363636	2.6051	2.14495	0.0554139	0.180256	0.133877	P4HB/JAK2/STAT4/PLCB1	4
celltypes.CD4 T cell.down	celltypes	CD4 T cell	down	BP	GO:0090331	negative regulation of platelet aggregation	4/2018	11/14457	0.363636	2.6051	2.14495	0.0554139	0.180256	0.133877	TMX1/CD9/SH2B3/PRKCD	4
celltypes.CD4 T cell.down	celltypes	CD4 T cell	down	BP	GO:0007623	circadian rhythm	32/2018	173/14457	0.184971	1.32514	1.73283	0.0562954	0.182863	0.135813	HNRNPU/USP7/FBXW7/HUWE1/THRAP3/BLOC1S6/NR1D2/CSNK1D/EP300/PPP1CC/KDM5A/USP9X/GSK3B/PPARA/KAT5/RORA/SETX/NCOR1/FBXW11/PARP1/RELB/SIAH2/PPP1CA/NCOA2/KLF10/CIPC/ID3/NFIL3/TIMELESS/ID2/BHLHE40/EGR1	32
celltypes.CD4 T cell.down	celltypes	CD4 T cell	down	BP	GO:0061351	neural precursor cell proliferation	27/2018	142/14457	0.190141	1.36217	1.74686	0.056378	0.182863	0.135813	HOOK3/GNAI2/PAFAH1B1/CTNNB1/RHOA/NUMB/RORA/NBN/SHOC2/BTG2/SIRT2/AKNA/FOXO3/ZNF335/KDM2B/ILK/HIF1A/NF1/TGFB1/ITGB1/FLNA/TOX/ID2/CTNNA1/CX3CR1/ADGRG1/LYN	27
celltypes.CD4 T cell.down	celltypes	CD4 T cell	down	BP	GO:0106106	cold-induced thermogenesis	27/2018	142/14457	0.190141	1.36217	1.74686	0.056378	0.182863	0.135813	APC/NRDC/UCP2/ADIPOR1/TLE3/STAT6/MFN2/QKI/DYNC1H1/RBPJ/ADAM17/TRPV2/ADIPOR2/ARRDC3/EHMT1/ACSL1/JAK2/IL4R/ABHD6/RB1/FABP5/CLSTN3/CXCR4/IL18R1/IRF4/ADRB2/SYK	27
celltypes.CD4 T cell.down	celltypes	CD4 T cell	down	BP	GO:0002526	acute inflammatory response	16/2018	76/14457	0.210526	1.50822	1.78917	0.0579102	0.187069	0.138937	PARK7/ASH1L/LIPA/SELENOS/PRCP/SPN/TFRC/ALOX5AP/APOL2/GSTP1/PLSCR1/PIK3CG/B4GALT1/ADAM8/FCGR3A/BTK	16
celltypes.CD4 T cell.down	celltypes	CD4 T cell	down	BP	GO:0002418	immune response to tumor cell	8/2018	31/14457	0.258065	1.84878	1.90544	0.0579744	0.187069	0.138937	HLA-A/HMGB1/CD226/MR1/TGFB1/PRF1/NKG7/HLA-DRB1	8
celltypes.CD4 T cell.down	celltypes	CD4 T cell	down	BP	GO:0031116	positive regulation of microtubule polymerization	8/2018	31/14457	0.258065	1.84878	1.90544	0.0579744	0.187069	0.138937	MECP2/CLIP1/RAC1/AKAP9/HSPA1A/CDK5RAP2/DCTN1/CLASP1	8
celltypes.CD4 T cell.down	celltypes	CD4 T cell	down	BP	GO:0014896	muscle hypertrophy	17/2018	82/14457	0.207317	1.48522	1.77475	0.0586024	0.188662	0.14012	STUB1/NFATC3/PPARA/ROCK1/PARP1/CAMK2D/KDM4A/SMAD3/JARID2/ATP2B4/MTPN/G6PD/PPP3CA/CYBA/TNFRSF1B/LMNA/RGS2	17
celltypes.CD4 T cell.down	celltypes	CD4 T cell	down	BP	GO:0030323	respiratory tube development	32/2018	174/14457	0.183908	1.31752	1.69719	0.0601054	0.192728	0.14314	FBXW7/BLOC1S6/PPP3R1/RC3H2/MECP2/EP300/CTNNB1/MAP2K1/LIPA/AP3B1/MAN1A2/MAP2K2/RBPJ/JMJD6/LTA4H/PPP1CA/YWHAZ/HS6ST1/TGFB1/STK40/BMPR1A/HEG1/RDH10/MAPK1/ANXA2/TRAF4/TIMELESS/SAV1/CTSZ/CTSH/FOSL2/HOPX	32
celltypes.CD4 T cell.down	celltypes	CD4 T cell	down	BP	GO:0098727	maintenance of cell number	32/2018	174/14457	0.183908	1.31752	1.69719	0.0601054	0.192728	0.14314	SMC3/ZC3H13/HOOK3/DDX6/RTF1/NIPBL/ZFP36L2/ELAVL1/PAF1/CTNNB1/DPF2/SKI/SMARCE1/MCPH1/RBBP7/BRAF/RBPJ/LIG4/EIF4ENIF1/NCOA3/SUDS3/FOXO3/ZHX2/KDM2B/KLF10/BMPR1A/SAP30/SMARCB1/SAV1/BCL7A/KIT/EOMES	32
celltypes.CD4 T cell.down	celltypes	CD4 T cell	down	BP	GO:0001556	oocyte maturation	7/2018	26/14457	0.269231	1.92878	1.90916	0.0605233	0.192858	0.143236	H3-3A/H3-3B/SIRT2/FOXO3/TUT7/REC8/PTK2B	7
celltypes.CD4 T cell.down	celltypes	CD4 T cell	down	BP	GO:2000737	negative regulation of stem cell differentiation	7/2018	26/14457	0.269231	1.92878	1.90916	0.0605233	0.192858	0.143236	HNRNPU/CDK12/ZFP36L2/GSK3B/NELFB/ZFP36/CDK13	7
celltypes.CD4 T cell.down	celltypes	CD4 T cell	down	BP	GO:0008298	intracellular mRNA localization	5/2018	16/14457	0.3125	2.23876	1.99682	0.0610549	0.193455	0.14368	QKI/ZFP36/MEX3D/ZFP36L1/BICD1	5
celltypes.CD4 T cell.down	celltypes	CD4 T cell	down	BP	GO:0071360	cellular response to exogenous dsRNA	5/2018	16/14457	0.3125	2.23876	1.99682	0.0610549	0.193455	0.14368	MAVS/RIGI/IFIH1/RALB/CGAS	5
celltypes.CD4 T cell.down	celltypes	CD4 T cell	down	BP	GO:0010878	cholesterol storage	6/2018	21/14457	0.285714	2.04686	1.93361	0.0619364	0.195039	0.144856	LIPA/PPARA/NPC2/EHD1/STARD4/NPC1	6
celltypes.CD4 T cell.down	celltypes	CD4 T cell	down	BP	GO:0046885	regulation of hormone biosynthetic process	6/2018	21/14457	0.285714	2.04686	1.93361	0.0619364	0.195039	0.144856	H6PD/ARNT/NR3C1/HIF1A/GFI1/EGR1	6
celltypes.CD4 T cell.down	celltypes	CD4 T cell	down	BP	GO:0016051	carbohydrate biosynthetic process	33/2018	181/14457	0.18232	1.30615	1.6694	0.0629423	0.197985	0.147044	USP7/CLTC/EP300/TPI1/MGAT2/AKT1/GSK3B/PPARA/SLC25A11/PGAM1/ACADM/NR3C1/PARP1/SIRT7/SELENOS/PPP1R3D/ST3GAL2/KAT2B/PPP1CA/ARPP19/CHSY1/TGFB1/CHST14/ST6GALNAC6/GYG1/G6PD/SESN2/CHST11/B4GALT1/CHST12/ST8SIA6/PLEK/CD244	33
celltypes.CD4 T cell.down	celltypes	CD4 T cell	down	BP	GO:0051881	regulation of mitochondrial membrane potential	15/2018	71/14457	0.211268	1.51353	1.74708	0.0632251	0.198319	0.147292	PARK7/VCP/UCP2/TUSC2/LIPA/PRELID1/MFN1/PARP1/GCLM/BCL2/UBB/ABL1/HSH2D/PMAIP1/CLIC1	15
celltypes.CD4 T cell.down	celltypes	CD4 T cell	down	BP	GO:0043403	skeletal muscle tissue regeneration	9/2018	37/14457	0.243243	1.7426	1.82165	0.0639065	0.199921	0.148482	KPNA1/CFLAR/CD9/MTPN/ANXA1/PPP3CA/CD81/P2RX5/HOPX	9
celltypes.CD4 T cell.down	celltypes	CD4 T cell	down	BP	GO:0031345	negative regulation of cell projection organization	32/2018	175/14457	0.182857	1.30999	1.66176	0.0640967	0.200382	0.148825	CIB1/PAFAH1B1/CCP110/AKT1/GDI2/CBFA2T2/RNF6/RAB29/PTPN1/MDM2/GAK/PRNP/ARF6/MAP4/NEO1/TESK1/DTNBP1/RAPGEF2/LUZP1/PRKCD/RUFY3/ITM2C/EPHA4/YWHAH/GFI1/PPP3CA/FLNA/CD38/MYLIP/ABI3/BCL11A/STAP1	32
celltypes.CD4 T cell.down	celltypes	CD4 T cell	down	BP	GO:0098771	inorganic ion homeostasis	74/2018	447/14457	0.165548	1.18599	1.60886	0.0642224	0.200664	0.149034	CALM2/TMBIM6/GHITM/XIAP/TMC6/SELENOK/MICU2/DIAPH1/FTH1/EGLN1/ATP6AP1/PDPK1/PDE4D/TMCO1/ARF1/AP3B1/ITPR2/NPTN/TTC7A/VMA22/HTT/PRNP/FECH/CAMK2D/KCTD17/PDZD8/STIM2/ATP1B3/ANXA6/SLC39A7/TMEM165/NT5E/RMDN3/SLC30A1/SLC12A2/BCL2/ABL1/TFRC/HIF1A/TGFB1/NEO1/NHERF1/STK39/CYB561A3/ATP6V0D1/PTK2B/TMEM38A/ITPR1/ATP2B4/ATP2B1/PRKCB/PICALM/CYB561/TCIRG1/ATP6V1A/CNNM4/ATP2A3/FLNA/CYBA/PLCB1/HERPUD1/SNX10/PRKCE/C…	74
celltypes.CD4 T cell.down	celltypes	CD4 T cell	down	BP	GO:0034332	adherens junction organization	12/2018	54/14457	0.222222	1.59201	1.75545	0.065755	0.204656	0.151999	CSK/CTNNB1/ADAM10/NUMB/ADD1/RDX/TBCD/VCL/EPHA4/SMAD7/MTSS1/DSP	12
celltypes.CD4 T cell.down	celltypes	CD4 T cell	down	BP	GO:0046854	phosphatidylinositol phosphate biosynthetic process	12/2018	54/14457	0.222222	1.59201	1.75545	0.065755	0.204656	0.151999	SMG1/EFR3A/PIKFYVE/PIK3R1/TTC7A/PIP4K2A/PI4K2A/BPNT2/UVRAG/HYCC1/FIG4/PIK3CG	12
celltypes.CD4 T cell.down	celltypes	CD4 T cell	down	BP	GO:0006911	phagocytosis, engulfment	10/2018	43/14457	0.232558	1.66605	1.76174	0.0683129	0.21133	0.156956	CLCN3/NCKAP1L/MYH9/ARHGAP25/STAP1/GSN/ITGAM/CD300A/PLCG2/RAB31	10
celltypes.CD4 T cell.down	celltypes	CD4 T cell	down	BP	GO:0045444	fat cell differentiation	37/2018	208/14457	0.177885	1.27437	1.60534	0.0695649	0.214495	0.159306	STK4/HNRNPU/TBL1XR1/PSMB8/NIPBL/ZFP36L2/EP300/SYAP1/AKT1/ZFP36/RORA/ZBTB7A/SDF4/SMAD3/SIRT2/OSBPL11/ZC3H12A/MEX3C/TGFB1/AXIN1/ZFP36L1/ARID5B/NR4A2/SAV1/PLCB1/ID2/ZBTB16/DUSP10/RGS2/TRIO/METRNL/FOSL2/NR4A1/ADRB2/CTBP2/CEBPD/ALOX5	37
celltypes.CD4 T cell.down	celltypes	CD4 T cell	down	BP	GO:0006997	nucleus organization	27/2018	145/14457	0.186207	1.33399	1.62802	0.0697781	0.215034	0.159707	CTDNEP1/SUN2/NEAT1/UBE2I/CHMP4B/PAFAH1B1/CHMP4A/EMD/VPS4B/H3-3A/CHMP1B/BAZ2A/H3-3B/KAT5/TMF1/DCTN1/ZMPSTE24/BROX/SIRT2/IRAG2/CHMP1A/PSME4/SRPK2/TMEM43/PRKCB/SYNE1/LMNA	27
celltypes.CD4 T cell.down	celltypes	CD4 T cell	down	BP	GO:0009988	cell-cell recognition	11/2018	49/14457	0.22449	1.60825	1.71779	0.0715527	0.220141	0.1635	DLG1/DOCK8/DOCK2/LGALS3/CD9/NEDD9/MSN/ST6GALNAC6/CD81/B4GALT1/PRF1	11
celltypes.CD4 T cell.down	celltypes	CD4 T cell	down	BP	GO:0061384	heart trabecula morphogenesis	7/2018	27/14457	0.259259	1.85734	1.79595	0.0722614	0.221111	0.16422	EGLN1/SOS1/RBPJ/BMPR1A/HEG1/TGFBR1/TGFBR3	7
celltypes.CD4 T cell.down	celltypes	CD4 T cell	down	BP	GO:0001822	kidney development	49/2018	286/14457	0.171329	1.2274	1.56448	0.0724713	0.221633	0.164608	BLOC1S6/NIPBL/DLG1/AP2B1/CTNNB1/APAF1/BMI1/RHOA/CUL3/CAT/ZMPSTE24/JMJD6/PRKX/SMAD3/ILK/BCL2/CFLAR/AHI1/ODC1/DYNC2H1/NF1/TGFB1/DTNBP1/ID3/SGPL1/RRM2B/BCL2L11/EPHA4/RDH10/PPP3CA/PTCH1/AP1B1/NOTCH2/TGFBR1/ARID5B/IQGAP1/SMAD7/PLXND1/ZBTB16/MTSS1/PRDM1/SMAD5/CTSH/MPST/GCNT1/EGR1/MEF2C/BASP1/CD24	49
celltypes.CD4 T cell.down	celltypes	CD4 T cell	down	BP	GO:0006457	protein folding	35/2018	196/14457	0.178571	1.27929	1.58562	0.0725503	0.221754	0.164697	AHSA1/ANP32E/P4HB/DNAJB14/FKBP2/PDIA6/CSNK2A1/UGGT1/DNAJC5/HSP90AA1/CDC123/BAG1/RIC8A/DNAJB11/DNAJA1/TBCB/HSPA1A/HSPA4/ERP44/DNAJC10/GAK/UNC45A/DNAJB2/TAPBP/DNAJB6/WIPF1/WDR83OS/GRN/TXNDC5/TBCD/RP2/QSOX1/DNAJC1/QSOX2/CD74	35
celltypes.CD4 T cell.down	celltypes	CD4 T cell	down	BP	GO:0001765	membrane raft assembly	4/2018	12/14457	0.333333	2.38801	1.93738	0.074217	0.22273	0.165422	ILK/RFTN1/ANXA2/IQGAP1	4
celltypes.CD4 T cell.down	celltypes	CD4 T cell	down	BP	GO:0043476	pigment accumulation	4/2018	12/14457	0.333333	2.38801	1.93738	0.074217	0.22273	0.165422	BLOC1S6/AP3D1/AP1G1/CD63	4
celltypes.CD4 T cell.down	celltypes	CD4 T cell	down	BP	GO:0043482	cellular pigment accumulation	4/2018	12/14457	0.333333	2.38801	1.93738	0.074217	0.22273	0.165422	BLOC1S6/AP3D1/AP1G1/CD63	4
celltypes.CD4 T cell.down	celltypes	CD4 T cell	down	BP	GO:0071233	cellular response to L-leucine	4/2018	12/14457	0.333333	2.38801	1.93738	0.074217	0.22273	0.165422	EP300/UBR1/UBR2/SESN2	4
celltypes.CD4 T cell.down	celltypes	CD4 T cell	down	BP	GO:0110075	regulation of ferroptosis	4/2018	12/14457	0.333333	2.38801	1.93738	0.074217	0.22273	0.165422	FTH1/SLC39A7/SQSTM1/TMEM164	4
celltypes.CD4 T cell.down	celltypes	CD4 T cell	down	BP	GO:1900103	positive regulation of endoplasmic reticulum unfolded protein response	4/2018	12/14457	0.333333	2.38801	1.93738	0.074217	0.22273	0.165422	PIK3R1/PTPN1/ERN1/BCL2L11	4
celltypes.CD4 T cell.down	celltypes	CD4 T cell	down	BP	GO:1903898	negative regulation of PERK-mediated unfolded protein response	4/2018	12/14457	0.333333	2.38801	1.93738	0.074217	0.22273	0.165422	AKT1/PPP1R15A/PTPN1/AKT3	4
celltypes.CD4 T cell.down	celltypes	CD4 T cell	down	BP	GO:0070168	negative regulation of biomineral tissue development	6/2018	22/14457	0.272727	1.95382	1.80328	0.075502	0.224618	0.166825	ROCK1/BCOR/HIF1A/TGFB1/PTK2B/SRGN	6
celltypes.CD4 T cell.down	celltypes	CD4 T cell	down	BP	GO:0002062	chondrocyte differentiation	19/2018	97/14457	0.195876	1.40326	1.60505	0.0768539	0.226722	0.168387	CTNNB1/SMAD3/BPNT2/MEX3C/HIF1A/CHSY1/TGFB1/EIF2AK3/BMPR1A/MEF2D/CREB3L2/RB1/CHST11/TGFBR1/SMAD7/RUNX3/ZBTB16/FOSL2/MEF2C	19
celltypes.CD4 T cell.down	celltypes	CD4 T cell	down	BP	GO:0070555	response to interleukin-1	19/2018	97/14457	0.195876	1.40326	1.60505	0.0768539	0.226722	0.168387	RC3H1/BMI1/RORA/TRAF6/MYD88/GBP3/IRAK1/TANK/ZC3H12A/HIF1A/VRK2/RIPK2/CD38/IRAK2/PLCB1/ZBP1/CCL5/CD40/EGR1	19
celltypes.CD4 T cell.down	celltypes	CD4 T cell	down	BP	GO:0035338	long-chain fatty-acyl-CoA biosynthetic process	5/2018	17/14457	0.294118	2.10707	1.83953	0.0769185	0.226722	0.168387	HACD2/ACSL4/ACSL1/ELOVL1/ACSL5	5
celltypes.CD4 T cell.down	celltypes	CD4 T cell	down	BP	GO:0045346	regulation of MHC class II biosynthetic process	5/2018	17/14457	0.294118	2.10707	1.83953	0.0769185	0.226722	0.168387	TAF7/RFX5/JAK2/TMEM106A/CIITA	5
celltypes.CD4 T cell.down	celltypes	CD4 T cell	down	BP	GO:0099638	endosome to plasma membrane protein transport	5/2018	17/14457	0.294118	2.10707	1.83953	0.0769185	0.226722	0.168387	ATP6AP1/GRIPAP1/SCRIB/RAB8A/AKAP5	5
celltypes.CD4 T cell.down	celltypes	CD4 T cell	down	BP	GO:0071277	cellular response to calcium ion	15/2018	73/14457	0.205479	1.47206	1.62858	0.0772398	0.227309	0.168823	MICU2/BRAF/ADD1/CAMK2D/CPNE3/JUND/ALOX5AP/NFATC2/IQGAP1/SLC25A24/FOS/CPNE7/CLIC4/PLCG2/MEF2C	15
celltypes.CD4 T cell.down	celltypes	CD4 T cell	down	BP	GO:0008038	neuron recognition	10/2018	44/14457	0.227273	1.62819	1.68085	0.0778373	0.228353	0.169598	NPTN/CASP3/BSG/YWHAZ/MEGF8/EPHA4/ARHGAP35/CXCR4/PLXND1/PALLD	10
celltypes.CD4 T cell.down	celltypes	CD4 T cell	down	BP	GO:0014075	response to amine	10/2018	44/14457	0.227273	1.62819	1.68085	0.0778373	0.228353	0.169598	MYD88/JAK2/RRM2B/PPP1R9B/PPP3CA/NR4A2/RGS2/RGS9/NR4A1/CNR2	10
celltypes.CD4 T cell.down	celltypes	CD4 T cell	down	BP	GO:0001837	epithelial to mesenchymal transition	28/2018	153/14457	0.183007	1.31106	1.55796	0.0784075	0.229905	0.170752	PPP2CA/PPP3R1/ADIPOR1/TASOR/CTNNB1/GSK3B/QKI/ROCK1/RBPJ/SMAD3/AKNA/MAD2L2/HIF1A/TGFB1/USF3/KBTBD8/CLASP1/S100A4/EPHA4/FLNA/TGFBR1/SMAD7/ADAM8/GLIPR2/PHLDB2/TGFBR3/EOMES/NCAM1	28
celltypes.CD4 T cell.down	celltypes	CD4 T cell	down	BP	GO:0016202	regulation of striated muscle tissue development	8/2018	33/14457	0.242424	1.73673	1.70654	0.0795219	0.232325	0.172548	CTNNB1/SMAD3/SIRT2/BCL2/TGFB1/MTPN/YBX3/MEF2C	8
celltypes.CD4 T cell.down	celltypes	CD4 T cell	down	BP	GO:0071312	cellular response to alkaloid	8/2018	33/14457	0.242424	1.73673	1.70654	0.0795219	0.232325	0.172548	MECP2/CASP3/MDM2/BLM/CASP7/TMEM38A/PPP1R9B/SPIDR	8
celltypes.CD4 T cell.down	celltypes	CD4 T cell	down	BP	GO:0140058	neuron projection arborization	8/2018	33/14457	0.242424	1.73673	1.70654	0.0795219	0.232325	0.172548	ROCK1/TAOK2/CC2D1A/MACF1/DVL3/NTNG2/BCL7A/PHACTR1	8
celltypes.CD4 T cell.down	celltypes	CD4 T cell	down	BP	GO:0002042	cell migration involved in sprouting angiogenesis	11/2018	50/14457	0.22	1.57609	1.64353	0.0806875	0.234875	0.174443	FBXW7/CIB1/AKT1/RHOA/HDAC5/AKT3/ABL1/ANXA1/ITGB1/TGFBR3/NR4A1	11
celltypes.CD4 T cell.down	celltypes	CD4 T cell	down	BP	GO:0035264	multicellular organism growth	26/2018	141/14457	0.184397	1.32103	1.54287	0.0812903	0.236141	0.175383	RBBP6/TBL1XR1/BLOC1S6/NIPBL/RC3H2/EP300/H3-3A/ATRX/H3-3B/HTRA2/SOS1/ZMPSTE24/WDTC1/BCL2/ZFP36L1/STK40/SGPL1/HEG1/WDR11/PTCH1/NOTCH2/EZR/ARID5B/CLIC4/FOSL2/ADRB2	26
celltypes.CD4 T cell.down	celltypes	CD4 T cell	down	BP	GO:0043413	macromolecule glycosylation	37/2018	211/14457	0.175355	1.25625	1.51026	0.0822005	0.238539	0.177163	DDOST/TMEM59/MGAT1/GOLGA2/UGGT1/MGAT2/OGA/MAN2A2/GXYLT1/MAN1A2/MGAT5/GALNT1/TMEM165/ST3GAL2/ST6GAL1/GALNT11/UBE2J1/GALNT10/CHP1/ST3GAL5/EXTL3/B3GNT2/ST8SIA4/FUT11/ST6GALNAC6/TET2/B4GALT5/DPY19L1/GALNT6/ABCA2/MAN1A1/GALNT2/B4GALT1/TRAK1/NPC1/GCNT1/ST8SIA6	37
celltypes.CD4 T cell.down	celltypes	CD4 T cell	down	BP	GO:0048675	axon extension	20/2018	104/14457	0.192308	1.3777	1.55697	0.0825967	0.239333	0.177754	EIF4G2/PAFAH1B1/TTL/USP9X/GOLGA4/GSK3B/DNM2/RNF6/TRPV2/MEGF8/MACF1/SPG11/ABL1/VCL/RUFY3/ITGB1/ALCAM/LIMK1/AUTS2/BCL11A	20
celltypes.CD4 T cell.down	celltypes	CD4 T cell	down	BP	GO:0032922	circadian regulation of gene expression	13/2018	62/14457	0.209677	1.50213	1.59588	0.0839128	0.242257	0.179925	HNRNPU/HUWE1/CSNK1D/PPP1CC/KDM5A/PPARA/RORA/RELB/PPP1CA/NCOA2/ID2/BHLHE40/EGR1	13
celltypes.CD4 T cell.down	celltypes	CD4 T cell	down	BP	GO:0030500	regulation of bone mineralization	14/2018	68/14457	0.205882	1.47495	1.58116	0.0846432	0.242868	0.180379	ZMPSTE24/SMAD3/BCOR/HIF1A/BMP2K/BMPR1A/PTK2B/ATP2B1/RXRA/TENT5A/SRGN/ADRB2/ALOX5/MEF2C	14
celltypes.CD4 T cell.down	celltypes	CD4 T cell	down	BP	GO:0034250	positive regulation of amide metabolic process	7/2018	28/14457	0.25	1.79101	1.68746	0.08525	0.243244	0.180658	CASP3/IFNGR1/PRKCD/EPHA4/PICALM/ABCA2/GSAP	7
celltypes.CD4 T cell.down	celltypes	CD4 T cell	down	BP	GO:1902473	regulation of protein localization to synapse	7/2018	28/14457	0.25	1.79101	1.68746	0.08525	0.243244	0.180658	GABARAP/DLG1/GRIPAP1/ADAM10/TRAF6/ABHD17B/CLSTN3	7
celltypes.CD4 T cell.down	celltypes	CD4 T cell	down	BP	GO:1904738	vascular associated smooth muscle cell migration	7/2018	28/14457	0.25	1.79101	1.68746	0.08525	0.243244	0.180658	PTPN1/MDM2/GNA13/NF1/SSH1/GNA12/MEF2C	7
celltypes.CD4 T cell.down	celltypes	CD4 T cell	down	BP	GO:0042886	amide transport	45/2018	264/14457	0.170455	1.22114	1.46058	0.0876912	0.249955	0.185643	PARK7/CCDC186/UCP2/ENSA/RAB8B/CERT1/SGPP1/PFKL/TAP1/DISP1/ACSL4/RAB11FIP5/PSAP/SLC38A5/SELENOT/ABAT/GLTP/PFKFB2/HIF1A/JAK2/CYB5R4/TAP2/NHERF1/CPT1A/BAIAP3/MIDN/SIDT2/ITPR1/PRKCB/NADK/PRKAR1A/TCIRG1/PPP3CA/ABCA2/CD38/PLCB1/ABCB1/PRKCE/SLC15A4/GPR68/CCL5/BLK/CD74/ALOX5/HLA-DRB1	45
celltypes.CD4 T cell.down	celltypes	CD4 T cell	down	CC	GO:0005774	vacuolar membrane	141/2087	474/15236	0.297468	2.17165	10.324	2.22193e-20	1.55313e-17	1.19984e-17	ATP6V0E1/KIF5B/TMEM30A/GABARAP/VTI1B/DDOST/RAB2A/ATG4B/TMEM59/ATG12/RB1CC1/ATP6V1E1/GNAI3/AP3D1/SAR1A/UBA1/HLA-F/CLTC/LAMP1/CHMP4B/VPS13C/CHMP4A/LAPTM5/OSTM1/AP2M1/M6PR/AP2B1/RAP1B/DNAJC5/ATP6AP1/AP1G1/RAB14/CHMP1B/RRAGC/GNB1/VPS33A/LAPTM4A/RAB5C/SNX14/CLCN3/ATP6V1D/AP3B1/VAMP8/LAMTOR5/VMA22/BORCS6/SPPL2B/SURF4/RNF13/TMEM179B/NSF/VPS41/MANBA/AP5B1/RNF167/ATP6V0C/NEU1/LMBRD1/BLOC1S1/ANXA6/CPNE3/AT…	141
celltypes.CD4 T cell.down	celltypes	CD4 T cell	down	CC	GO:0005770	late endosome	98/2087	298/15236	0.328859	2.40081	9.72922	1.05242e-17	1.8391e-15	1.42076e-15	TMEM30A/VTI1B/MAPKAP1/RAB22A/TMEM59/LAMP1/CHMP4B/VPS13C/CHMP4A/VPS4B/M6PR/VPS36/RAB14/CHMP1B/MON1B/MAP2K1/VPS33A/LAPTM4A/SNX14/CLCN3/PIKFYVE/VAMP8/LAMTOR5/STX8/ECPAS/MAP2K2/HTT/FYCO1/RNF13/ZMPSTE24/TSG101/VPS41/AP5B1/MR1/SDF4/ANXA6/ARL8A/MARCHF8/IGF2R/CHMP1A/OSBPL11/GRN/VPS18/SQSTM1/LITAF/RMC1/PSAP/ANKRD13A/DERL1/SPPL2A/NEDD4L/UVRAG/VOPP1/CLCN6/PLEKHM1/UBE2A/MYO5A/RAPGEF2/CYB561A3/ABHD6/SLC30A4/B…	98
celltypes.CD4 T cell.down	celltypes	CD4 T cell	down	CC	GO:0101002	ficolin-1-rich granule	63/2087	177/15236	0.355932	2.59846	8.5217	1.31279e-13	1.31092e-11	1.01273e-11	PSMB1/ARPC5/PDAP1/PSMD2/HUWE1/VCP/KPNB1/DIAPH1/FTH1/LAMP1/PAFAH1B2/COPB1/DBNL/RAC1/UBR4/HSP90AA1/APAF1/SERPINB6/GNS/YPEL5/RHOA/ACTR2/GSDMD/ACLY/HSPA1A/PSMD14/PGAM1/CAT/NCKAP1L/PFKL/HMGB1/TMEM179B/CDK13/ASAH1/ATP6V0C/DYNC1LI1/LTA4H/ARL8A/LGALS3/PRCP/CTSD/DYNLL1/CAPN1/VCL/OSTF1/GYG1/GSTP1/CTSS/TCIRG1/MAPK1/PLEKHO2/ENPP4/NBEAL2/CD58/FCER1G/CTSZ/ADAM8/CTSH/GSN/HBB/CD300A/ALOX5/DSP	63
celltypes.CD4 T cell.down	celltypes	CD4 T cell	down	CC	GO:0030667	secretory granule membrane	87/2087	287/15236	0.303136	2.21302	8.26494	1.52386e-13	1.33148e-11	1.02861e-11	TMEM30A/DDOST/STK10/TMC6/DIAPH1/LAMP1/COPB1/RAB18/DEGS1/VPS13C/RAC1/UBR4/RAP1B/DNAJC5/RAP2B/TMED10/RAB14/SERPINB6/RHOA/RAB6A/RAB5C/ADAM10/HLA-B/ATP6V1D/VAMP8/ITPR2/RAB24/HLA-C/NCKAP1L/CD53/RAB4B/SURF4/TMEM179B/SCAMP1/MANBA/IQGAP2/ATP6V0C/DYNC1LI1/CPNE3/ATP8A1/IRAG2/ARL8A/IGF2R/LGALS3/BSG/PRCP/LAIR1/DYNLL1/SNAP23/PSAP/HGSNAT/RAP2C/ITGAL/CMTM6/CD9/ADGRE5/PTPRJ/ITPR1/FABP5/GLIPR1/PAM/CYB561/TCIRG1/A…	87
celltypes.CD4 T cell.down	celltypes	CD4 T cell	down	CC	GO:0005766	primary lysosome	52/2087	136/15236	0.382353	2.79134	8.35979	7.22123e-13	4.58876e-11	3.54497e-11	TMEM30A/DDOST/CAP1/VAT1/VCP/LAMP1/PRDX6/RAP1B/DNAJC5/GNS/TRAPPC1/GDI2/ACTR2/DYNC1H1/RAB5C/VAMP8/STXBP2/ACLY/NPC2/SURF4/HEXA/TMEM179B/MANBA/ATP6V0C/CPNE3/TUBB4B/ATP8A1/IRAG2/ARL8A/GRN/PRCP/CYB5R3/SNAP23/PSAP/CTSA/CMTM6/TXNDC5/PRKCD/CTSC/FUCA1/FABP5/GLIPR1/MAPK1/ANXA2/BST2/LPCAT1/B4GALT1/RAB37/STX7/GM2A/STOM/CD63	52
celltypes.CD4 T cell.down	celltypes	CD4 T cell	down	CC	GO:0030055	cell-substrate junction	108/2087	419/15236	0.257757	1.88173	7.29123	1.98812e-11	9.26462e-10	7.15722e-10	ITGA4/HNRNPK/ARPC5/JAK1/P4HB/PTPRA/CFL1/CORO1B/BLOC1S6/CAP1/CLTC/PPP1CC/RAC1/CTNNB1/SH3KBP1/PDPK1/ARPC2/MAP2K1/PRKAR2A/DNM2/RHOA/GDI2/ACTR2/ARF1/ADAM10/NUMB/ARPC3/MDC1/GIT2/HSPA1A/SSH2/ACTR3/CAT/MAP2K2/IRF2/ADD1/ADAM17/MYH9/GAK/FERMT3/SYNE2/ATP6V0C/ANXA6/CPNE3/VASP/TPM4/MAPRE2/PPP1R12A/IGF2R/TRIOBP/BSG/YWHAZ/TLN1/MPZL1/ARF6/GNA13/ILK/SNAP23/LCP1/PEAK1/JAK2/RDX/CD9/ADGRE5/NEDD9/CAPN1/MSN/ARPC5L/SN…	108
celltypes.CD4 T cell.down	celltypes	CD4 T cell	down	CC	GO:0042611	MHC protein complex	16/2087	21/15236	0.761905	5.56223	8.33465	1.4999e-10	6.16723e-09	4.76439e-09	HLA-F/HLA-A/HLA-B/HLA-C/MR1/HLA-DOA/CD74/HLA-DPB1/HLA-DMA/HLA-DMB/HLA-DPA1/HLA-DRA/HLA-DRB1/HLA-DQB1/HLA-DRB5/HLA-DQA1	16
celltypes.CD4 T cell.down	celltypes	CD4 T cell	down	CC	GO:0001772	immunological synapse	23/2087	47/15236	0.489362	3.57255	7.03695	7.19444e-09	2.6468e-07	2.04473e-07	DLG1/NPTN/CD53/SCRIB/MYH9/LGALS3/CARD11/NEDD9/PTPRJ/ATP2B1/PRKAR1A/ALCAM/CD81/EZR/CD37/CALHM6/STX7/VAV3/PRF1/GZMA/HLA-DRA/GZMB/HLA-DRB1	23
celltypes.CD4 T cell.down	celltypes	CD4 T cell	down	CC	GO:0009897	external side of plasma membrane	82/2087	322/15236	0.254658	1.85912	6.20753	9.74693e-09	3.40655e-07	2.63167e-07	ITGA4/P4HB/CLEC2D/SLC38A1/IL2RG/HLA-F/LAMP1/HLA-A/GSR/BTN3A2/HLA-B/CLCN3/BTN2A1/BTN3A1/HLA-C/BTN3A3/PRNP/CD226/MR1/CLPTM1/NT5E/CD84/ITGAE/SLAMF1/SPN/ITGAL/TFRC/CD9/MICB/IL4R/BMPR1A/SLAMF6/HEG1/BTN2A2/CAPN2/MAP3K5/ANXA5/ITGB1/ALCAM/KLRK1/CD8A/CCR6/B4GALT1/CXCR4/ABCB1/FCER1G/ITGA1/KIT/CXCR3/TGFBR3/CXCR5/CXCR6/FCRL3/IL2RB/CD74/TNFRSF13C/KLRC3/ITGAM/CD40/CD83/KLRC2/CCR5/SLAMF7/KLRC1/CD79B/KLRD1/FASLG…	82
celltypes.CD4 T cell.down	celltypes	CD4 T cell	down	CC	GO:0015629	actin cytoskeleton	111/2087	485/15236	0.228866	1.67082	5.98139	1.76584e-08	5.61056e-07	4.33434e-07	HNRNPK/SEPTIN2/ARPC5/GABARAP/RAB22A/MYL12B/TPM3/CFL1/CORO1B/BLOC1S6/CAP1/MYL6/DIAPH1/DSTN/DBNL/RAC1/WDR1/FKBP15/ARPC2/DNM2/ACTR2/ARPC3/ACTR1A/ACTR3/RIGI/SPPL2B/WAS/FCHSD1/ADD1/TAOK2/ADAM17/MYH9/FERMT3/AKAP13/IQGAP2/ARPC4/WIPF1/VASP/TPM4/SEPTIN11/DAAM1/PPP1R12A/CAPZA1/KAT2B/TRIOBP/VPS18/KEAP1/LSP1/PIEZO1/HIP1R/MACF1/LCP1/ABL1/TAGLN2/PEAK1/MYO9B/TAX1BP3/DUSP22/RDX/MYO5A/ARPC5L/NHERF1/SEPTIN7/LASP1/…	111
celltypes.CD4 T cell.down	celltypes	CD4 T cell	down	CC	GO:0031252	cell leading edge	95/2087	409/15236	0.232274	1.6957	5.68189	9.09634e-08	2.27084e-06	1.75429e-06	ARPC5/P4HB/APC/RAB22A/CFL1/CORO1B/BLOC1S6/DIAPH1/CIB1/PAFAH1B1/CLIP1/DBNL/RAC1/CTNNB1/AKT1/ARPC2/DOCK8/RHOA/SLK/ABI1/ARF1/CLCN3/ARPC3/PHACTR4/DPP9/ACTR3/RIGI/SSX2IP/ROCK1/DCTN1/MTMR9/SRGAP2/SCRIB/SNX5/ADAM17/MYH9/SYNE2/IQGAP2/APPL1/WIPF1/VASP/SAMSN1/TLN1/ARF6/PIEZO1/PSTPIP1/ILK/SH3BGRL3/HIP1R/MACF1/KSR1/LCP1/ABL1/MYO9B/DUSP22/RDX/MYO5A/NEDD9/PSD4/TESK1/NHERF1/INPPL1/PTPRJ/SSH1/LMO4/PTK2B/RUFY3/KL…	95
celltypes.CD4 T cell.down	celltypes	CD4 T cell	down	CC	GO:0098562	cytoplasmic side of membrane	52/2087	190/15236	0.273684	1.99801	5.51491	4.57827e-07	9.41238e-06	7.27137e-06	JAK1/GNAI3/GNAI2/PTP4A1/CHMP4B/GRK2/DLG1/CHMP4A/AP2M1/AP2B1/RASAL3/SYAP1/DNAJA1/GNB1/RHOA/BORCS6/HTRA2/PTPN1/SPPL2B/MAP2K2/SNX5/MYH9/DNAJB2/GNB5/TRAF6/MYD88/BLOC1S1/BLOC1S2/MIEN1/LITAF/GNA13/SPPL2A/PTPN7/JAK2/GNG2/PTPN4/SNX18/G6PD/PPP1R9B/PPP3CA/IQGAP1/GNA12/GM2A/MTSS1/PTPN22/RGS2/GNG7/KIT/AKAP5/LYN/GNB4/CNR2	52
celltypes.CD4 T cell.down	celltypes	CD4 T cell	down	CC	GO:0098791	Golgi apparatus subcompartment	82/2087	353/15236	0.232295	1.69585	5.2698	6.83173e-07	1.29064e-05	9.97063e-06	USO1/TGOLN2/TMEM59/MOB4/CCDC186/SAR1A/OPTN/CLTC/GOLGA2/M6PR/RAC1/HLA-A/AP1G1/RAB14/MGAT2/GOLGA4/VCPIP1/RAB6A/ARL1/GOLPH3/AKAP9/ARL5A/RAB29/BIRC6/STX8/ARAP1/CHPF2/NSF/SCAMP1/PLEKHA3/GALNT1/AFTPH/GPR108/RGP1/GOLGB1/ATP8A1/TMEM165/IGF2R/FAM91A1/ST3GAL2/PI4K2A/BPNT2/GRN/RAB8A/ST6GAL1/SCAMP4/CHSY1/WIPI1/FUT11/BICD1/BAIAP3/ARFIP1/RAB9A/WDR11/FURIN/AP1B1/FLNA/B4GALT5/RAB30/SYT11/USP6NL/GALNT2/B4GALT1/CH…	82
celltypes.CD4 T cell.down	celltypes	CD4 T cell	down	CC	GO:0098553	lumenal side of endoplasmic reticulum membrane	15/2087	30/15236	0.5	3.65022	5.78856	2.16671e-06	3.60603e-05	2.78577e-05	HLA-F/HLA-A/HLA-B/SPPL2B/HLA-C/TAPBP/SPPL2A/CD74/HLA-DPB1/HLA-DPA1/HLA-DRA/HLA-DRB1/HLA-DQB1/HLA-DRB5/HLA-DQA1	15
celltypes.CD4 T cell.down	celltypes	CD4 T cell	down	CC	GO:0001726	ruffle	49/2087	184/15236	0.266304	1.94414	5.13314	2.29717e-06	3.73424e-05	2.88482e-05	APC/RAB22A/CFL1/BLOC1S6/DIAPH1/CIB1/CLIP1/DBNL/RAC1/RHOA/CLCN3/RIGI/ROCK1/MTMR9/SNX5/ADAM17/MYH9/APPL1/WIPF1/SAMSN1/TLN1/ARF6/SH3BGRL3/HIP1R/MACF1/KSR1/LCP1/ABL1/MYO9B/MYO5A/PSD4/NHERF1/PTPRJ/KLHL2/PPP1R9B/ITGB1/CYTH3/EZR/CAPG/IQGAP1/CORO1C/ARHGAP18/MTSS1/PDE4A/PALLD/MYO6/PLCG2/FGD2/PLEK	49
celltypes.CD4 T cell.down	celltypes	CD4 T cell	down	CC	GO:0005775	vacuolar lumen	42/2087	151/15236	0.278146	2.03058	5.07032	3.60967e-06	5.25659e-05	4.06088e-05	CAP1/VAT1/VCP/PRDX6/HSP90AA1/LIPA/GNS/TRAPPC1/GDI2/ACTR2/DYNC1H1/ACLY/NPC2/TPP1/HEXA/MANBA/ASAH1/NEU1/TUBB4B/GRN/CTSD/CYB5R3/PSAP/HGSNAT/CTSA/TXNDC5/IDS/PRKCD/CTSC/FUCA1/FABP5/GYG1/CTSS/MAPK1/ANXA2/GM2A/IFI30/CD74/DAPK2/PRF1/FASLG/GZMB	42
celltypes.CD4 T cell.down	celltypes	CD4 T cell	down	CC	GO:0030117	membrane coat	30/2087	94/15236	0.319149	2.32992	5.15271	4.44149e-06	6.08745e-05	4.70275e-05	AP3D1/SAR1A/COPA/CLTC/COPB1/COPE/CHMP4B/CLINT1/CHMP4A/AP2M1/AP2B1/AP1G1/CHMP1B/COPB2/VPS33A/AP3B1/SEC24C/SCLT1/VPS41/AP5B1/AFTPH/IGF2R/DIPK2A/VPS18/EPS15L1/PICALM/EPS15/TBC1D5/AP1B1/AP1S3	30
celltypes.CD4 T cell.down	celltypes	CD4 T cell	down	CC	GO:0048475	coated membrane	30/2087	94/15236	0.319149	2.32992	5.15271	4.44149e-06	6.08745e-05	4.70275e-05	AP3D1/SAR1A/COPA/CLTC/COPB1/COPE/CHMP4B/CLINT1/CHMP4A/AP2M1/AP2B1/AP1G1/CHMP1B/COPB2/VPS33A/AP3B1/SEC24C/SCLT1/VPS41/AP5B1/AFTPH/IGF2R/DIPK2A/VPS18/EPS15L1/PICALM/EPS15/TBC1D5/AP1B1/AP1S3	30
celltypes.CD4 T cell.down	celltypes	CD4 T cell	down	CC	GO:0045121	membrane raft	61/2087	254/15236	0.240157	1.75325	4.82291	5.87275e-06	7.89433e-05	6.09862e-05	PARK7/PPP2CA/DLG1/RAP2B/CTNNB1/PRKAR2A/PIKFYVE/SMURF2/TPP1/VDAC1/ADAM17/PRNP/CD226/PI4K2A/CTSD/CARD11/CBLB/JAK2/CHP1/ARID3A/BMPR1A/RFTN1/VCL/ATP2B4/CAPN2/PRKAR1A/MAPK1/PTCH1/ITGB1/FURIN/ANXA2/BST2/TGFBR1/PLSCR1/EZR/TNFRSF1B/INPP5D/CORO1C/RHOQ/CD8A/SLC2A1/AHNAK/NPC1/STOM/CTNNA1/EFHD2/F2R/ITGAM/LAT2/FASLG/PLCG2/CD19/AKAP5/CD79A/MS4A1/ADGRG1/BTK/LYN/DMD/CD244/CD24	61
celltypes.CD4 T cell.down	celltypes	CD4 T cell	down	CC	GO:0030496	midbody	52/2087	206/15236	0.252427	1.84283	4.85209	6.26915e-06	8.11506e-05	6.26915e-05	HNRNPU/SEPTIN2/GNAI3/GNAI2/KIF20B/CHMP4B/PPP1CC/CHMP4A/VPS4B/EXOC5/CHMP1B/YPEL5/DNM2/RHOA/ABRAXAS2/CCDC124/KIF3B/BIRC6/DAPK3/TSG101/USP8/SIRT2/ARL8A/TRIOBP/CHMP1A/RAB8A/SH3GLB1/CCDC69/ARF6/KEAP1/TACC1/RAB11FIP4/RAP2A/UVRAG/RDX/DTNBP1/SEPTIN7/LUZP1/SSH1/RALB/PTCH1/CEP126/ANXA2/VPS37B/SYNE1/CAPG/IQGAP1/BCL3/SLC2A1/RASGEF1B/MICAL3/CLIC4	52
celltypes.CD4 T cell.down	celltypes	CD4 T cell	down	CC	GO:0005938	cell cortex	69/2087	308/15236	0.224026	1.63549	4.48866	1.86191e-05	0.000228329	0.000176392	SEPTIN2/FRYL/FNBP1/MYL12B/CAP1/PAFAH1B1/CLIP1/EMD/DSTN/DBNL/RAC1/RASAL3/CTNNB1/WDR1/EXOC5/RIC8A/AKT1/RHOA/ACTR2/DYNC1H1/TBCB/ITPR2/ACTR1A/DCTN1/FCHSD1/MYH9/GRB2/AKAP13/TRAF6/IQGAP2/FMNL1/TPM4/SEPTIN11/CAPZA1/ARF6/PIEZO1/ILK/HIP1R/MYO9B/RDX/NEDD9/AXIN1/ITCH/STK39/SEPTIN7/GPSM2/LASP1/PTK2B/VCL/CLASP1/LLGL2/PRKCB/PPP1R9B/CAPN2/FLNA/EZR/IQGAP1/CORO1C/ACTN4/KIF21A/SLC2A1/TRAK1/HIP1/CTSZ/MICAL3/PHLDB2/…	69
celltypes.CD4 T cell.down	celltypes	CD4 T cell	down	CC	GO:0098576	lumenal side of membrane	16/2087	39/15236	0.410256	2.99505	4.96985	2.40196e-05	0.000284571	0.00021984	HLA-F/HLA-A/HLA-B/SPPL2B/HLA-C/TAPBP/CTSA/SPPL2A/CD74/HLA-DPB1/HLA-DPA1/HLA-DRA/HLA-DRB1/HLA-DQB1/HLA-DRB5/HLA-DQA1	16
celltypes.CD4 T cell.down	celltypes	CD4 T cell	down	CC	GO:0030427	site of polarized growth	42/2087	163/15236	0.257669	1.88109	4.50559	2.79533e-05	0.000325656	0.00025158	ITGA4/FRYL/CFL1/COPA/KIF20B/CIB1/PAFAH1B1/HSP90AA1/USP9X/SYAP1/FKBP15/FMR1/DNM2/ABI1/ARPC3/SETX/TAOK2/TRPV2/SIRT2/CPEB4/PI4K2A/ABL1/AMFR/MYO5A/DTNBP1/SSH1/PTK2B/RUFY3/EPHA4/PPP1R9B/PTCH1/FLNA/PREX1/IQGAP1/KIF21A/WHRN/TRAK1/ORAI2/PALLD/AUTS2/PCDH9/BASP1	42
celltypes.CD4 T cell.down	celltypes	CD4 T cell	down	CC	GO:0008287	protein serine/threonine phosphatase complex	19/2087	52/15236	0.365385	2.66747	4.79846	3.01822e-05	0.00034028	0.000262877	CTDNEP1/PPP2CA/PPP2R5E/PPP3R1/PPP4R3A/PPP1CC/PPP1R15A/SHOC2/PPP2R5C/PPP1R12A/PPP1R3D/PPP1CA/PPP2R5A/PPP4R1/ITPR1/PPP1R9B/IER5/PPP3CA/AKAP5	19
celltypes.CD4 T cell.down	celltypes	CD4 T cell	down	CC	GO:0016605	PML body	30/2087	106/15236	0.283019	2.06616	4.38826	5.97024e-05	0.000632303	0.000488475	PARK7/USP7/UBE2I/CSNK2A1/ATRX/CDK9/SKI/ZBED1/HIPK3/RNF6/NBN/DAPK3/EIF4ENIF1/ISG20/SQSTM1/MKNK2/SP100/HIRA/GCNA/SPN/BLM/SKIL/RB1/TP53INP1/SMC6/ELF4/ZBTB16/SP140/CIITA/BASP1	30
celltypes.CD4 T cell.down	celltypes	CD4 T cell	down	CC	GO:0030426	growth cone	40/2087	158/15236	0.253165	1.84821	4.26969	6.5729e-05	0.00068574	0.000529756	ITGA4/CFL1/COPA/KIF20B/CIB1/PAFAH1B1/HSP90AA1/USP9X/SYAP1/FKBP15/FMR1/DNM2/ABI1/ARPC3/SETX/TAOK2/TRPV2/SIRT2/CPEB4/ABL1/AMFR/MYO5A/DTNBP1/SSH1/PTK2B/RUFY3/EPHA4/PPP1R9B/PTCH1/FLNA/PREX1/IQGAP1/KIF21A/WHRN/TRAK1/ORAI2/PALLD/AUTS2/PCDH9/BASP1	40
celltypes.CD4 T cell.down	celltypes	CD4 T cell	down	CC	GO:0005905	clathrin-coated pit	22/2087	73/15236	0.30137	2.20013	4.09481	0.000207511	0.00204296	0.00157825	FNBP1/CLTC/AP2M1/AP2B1/AP1G1/DNM2/LRP10/NUMB/RAB35/DGKD/EPS15L1/FCHSD2/HIP1R/TFRC/CCDC32/PICALM/EPS15/TBC1D5/FCHO2/AP1S3/MYO6/GAS7	22
celltypes.CD4 T cell.down	celltypes	CD4 T cell	down	CC	GO:0032587	ruffle membrane	27/2087	100/15236	0.27	1.97112	3.88152	0.000319015	0.00297322	0.00229691	APC/CFL1/DIAPH1/CIB1/RAC1/RHOA/CLCN3/RIGI/MTMR9/ADAM17/TLN1/SH3BGRL3/HIP1R/MACF1/KSR1/LCP1/PSD4/PTPRJ/PPP1R9B/ITGB1/EZR/CORO1C/PDE4A/MYO6/PLCG2/FGD2/PLEK	27
celltypes.CD4 T cell.down	celltypes	CD4 T cell	down	CC	GO:0035861	site of double-strand break	26/2087	99/15236	0.262626	1.91728	3.64786	0.000647666	0.00573062	0.00442709	ARPC5/VCP/PAXX/ARPC2/ACTR2/KAT5/ARPC3/MDC1/NBN/POLH/ACTR3/WAS/PARP1/RNF169/ZBTB7A/SIRT7/SLF1/ARPC4/MAD2L2/DYNLL1/NABP2/SMC6/CGAS/TIMELESS/LMNA/RBBP8	26
celltypes.CD4 T cell.down	celltypes	CD4 T cell	down	CC	GO:1904949	ATPase complex	31/2087	126/15236	0.246032	1.79614	3.57501	0.000702032	0.00613401	0.00473872	ATP6V0E1/ANP32E/ATP6V1E1/VCP/BAZ1B/VPS4B/SMARCD2/ATP6AP1/DEK/DPF2/BAZ2A/INO80/ATP6V1D/SMARCE1/KAT5/RBBP7/MBD2/VMA22/ARID1B/ATP6V0C/ATP6V0B/BPTF/ATP6V0D1/LUZP1/SMARCB1/RB1/TCIRG1/ATP6V1A/BCL7A/BCL11A/NCR1	31
celltypes.CD4 T cell.down	celltypes	CD4 T cell	down	CC	GO:0030864	cortical actin cytoskeleton	21/2087	75/15236	0.28	2.04412	3.61122	0.00084997	0.00715818	0.00552992	CAP1/DSTN/WDR1/ACTR2/FCHSD1/MYH9/AKAP13/PIEZO1/HIP1R/RDX/LASP1/VCL/LLGL2/PRKCB/PPP1R9B/CAPN2/IQGAP1/ACTN4/SLC2A1/HIP1/GSN	21
celltypes.CD4 T cell.down	celltypes	CD4 T cell	down	CC	GO:0019898	extrinsic component of membrane	34/2087	145/15236	0.234483	1.71183	3.43111	0.000999574	0.00812444	0.00627639	JAK1/APC/GNAI3/GNAI2/AP2M1/CTNNB1/GRIPAP1/GNB1/CRKL/ATP6V1D/AKAP9/PIK3R1/SCRIB/PRNP/GNB5/TRAF6/MYD88/GNA13/UVRAG/JAK2/GNG2/PICALM/PPP1R9B/ATP6V1A/PPP3CA/PIK3CG/GNA12/SNX10/CTNNA1/PDE4A/TRIO/GNG7/GNB4/CNR2	34
celltypes.CD4 T cell.down	celltypes	CD4 T cell	down	CC	GO:0017053	transcription repressor complex	20/2087	71/15236	0.28169	2.05646	3.55465	0.00102984	0.00827421	0.0063921	TBL1XR1/DRAP1/CTNNB1/LIN54/ETV3/SKI/MDM2/NCOR1/SPEN/RBPJ/HMGB1/RELB/JUND/FOXO3/AKIRIN2/GFI1/RBBP8/ZBTB16/JAZF1/CTBP2	20
celltypes.CD4 T cell.down	celltypes	CD4 T cell	down	CC	GO:0019897	extrinsic component of plasma membrane	24/2087	92/15236	0.26087	1.90446	3.46656	0.00113651	0.00892604	0.00689565	JAK1/APC/GNAI3/GNAI2/AP2M1/CTNNB1/GNB1/CRKL/AKAP9/SCRIB/GNB5/TRAF6/MYD88/GNA13/JAK2/GNG2/PICALM/PPP1R9B/PPP3CA/GNA12/CTNNA1/GNG7/GNB4/CNR2	24
celltypes.CD4 T cell.down	celltypes	CD4 T cell	down	CC	GO:1905369	endopeptidase complex	24/2087	93/15236	0.258065	1.88398	3.40655	0.0013365	0.0103802	0.00801901	PSMB1/PSMD2/PSMB8/VCP/SEC11A/PSMA4/UBR1/PSMB3/SPCS2/PSMB2/PSMD14/HTRA2/ECPAS/PSME1/ADRM1/DNAJB2/PSMB10/PSME3/RAD23B/CAPNS1/PSME4/CAPN1/PSMB9/CAPN2	24
celltypes.CD4 T cell.down	celltypes	CD4 T cell	down	CC	GO:0036464	cytoplasmic ribonucleoprotein granule	50/2087	240/15236	0.208333	1.52092	3.24062	0.00141514	0.0108702	0.00839754	HNRNPU/HNRNPK/DAZAP2/EID1/MBNL1/XRN1/SMG1/DDX6/VCP/KPNB1/RC3H2/ELAVL1/PSMA4/CARHSP1/RAC1/SERPINB1/RC3H1/UPF2/CDK9/EIF4EBP2/FMR1/QKI/KHNYN/SAMD4B/ZFP36/UHMK1/ROCK1/GABPB1/EIF4ENIF1/ISG20/BARD1/SQSTM1/HELZ/ZC3H12A/TDRD7/ZFP36L1/HENMT1/LIMD1/HELZ2/AGO4/SYNE1/PATL2/IQGAP1/APOBEC3D/APOBEC3F/APOBEC3C/CTSH/RNF135/APOBEC3G/APOBEC3H	50
celltypes.CD4 T cell.down	celltypes	CD4 T cell	down	CC	GO:0030175	filopodium	25/2087	100/15236	0.25	1.82511	3.29793	0.0017394	0.0127984	0.00988714	CIB1/FMR1/ABI1/DYNC1H1/SYNE2/IQGAP2/VASP/ARF6/UTRN/LCP1/OSBPL3/RDX/MYO5A/MSN/NHERF1/INPPL1/RUFY3/EPHA4/PPP1R9B/ITGB1/EZR/MYO1G/B4GALT1/MYO6/DMD	25
celltypes.CD4 T cell.down	celltypes	CD4 T cell	down	CC	GO:0033176	proton-transporting V-type ATPase complex	10/2087	27/15236	0.37037	2.70386	3.53023	0.00207711	0.014519	0.0112164	ATP6V0E1/ATP6V1E1/ATP6AP1/ATP6V1D/VMA22/ATP6V0C/ATP6V0B/ATP6V0D1/TCIRG1/ATP6V1A	10
celltypes.CD4 T cell.down	celltypes	CD4 T cell	down	CC	GO:0000805	X chromosome	6/2087	12/15236	0.5	3.65022	3.65884	0.00288878	0.0197967	0.0152936	XIST/H3-3A/H3-3B/LRIF1/PCGF5/PCGF3	6
celltypes.CD4 T cell.down	celltypes	CD4 T cell	down	CC	GO:0120111	neuron projection cytoplasm	22/2087	88/15236	0.25	1.82511	3.09251	0.00318892	0.0216413	0.0167186	KIF5B/BLOC1S6/AP3D1/PAFAH1B1/EIF4EBP2/FMR1/OPA1/DYNC1H1/AP3B1/UHMK1/KIF3B/FBXW11/BLOC1S1/BLOC1S2/ARL8A/KIF1B/HIP1R/ABHD12/HIF1A/DTNBP1/KIF21A/TRAK1	22
celltypes.CD4 T cell.down	celltypes	CD4 T cell	down	CC	GO:0030132	clathrin coat of coated pit	7/2087	17/15236	0.411765	3.00606	3.29694	0.00495258	0.0323538	0.0249943	CLTC/AP2M1/AP2B1/EPS15L1/PICALM/EPS15/TBC1D5	7
celltypes.CD4 T cell.down	celltypes	CD4 T cell	down	CC	GO:1905360	GTPase complex	11/2087	35/15236	0.314286	2.29442	3.05429	0.00550325	0.0349706	0.0270159	GNAI3/GNAI2/RRAGC/GNB1/SOS1/GNB5/GNA13/GNG2/GNA12/GNG7/GNB4	11
celltypes.CD4 T cell.down	celltypes	CD4 T cell	down	CC	GO:0031094	platelet dense tubular network	5/2087	10/15236	0.5	3.65022	3.33983	0.00664224	0.0403732	0.0311896	ITPR2/EHD1/ITPR1/ATP2A3/F2R	5
celltypes.CD4 T cell.down	celltypes	CD4 T cell	down	CC	GO:0000407	phagophore assembly site	11/2087	36/15236	0.305556	2.23069	2.94519	0.00696249	0.0412439	0.0318622	TAX1BP1/ATG12/RB1CC1/ATG16L2/WDR45/ILRUN/ATG2A/SNX30/RAB1B/SQSTM1/WIPI1	11
celltypes.CD4 T cell.down	celltypes	CD4 T cell	down	CC	GO:0000164	protein phosphatase type 1 complex	7/2087	18/15236	0.388889	2.83906	3.1102	0.00715831	0.0420475	0.0324831	PPP1CC/PPP1R15A/SHOC2/PPP1R12A/PPP1R3D/PPP1CA/PPP1R9B	7
celltypes.CD4 T cell.down	celltypes	CD4 T cell	down	CC	GO:0001931	uropod	6/2087	14/15236	0.428571	3.12876	3.17461	0.00735481	0.0421394	0.0325541	DNM2/MYH9/PSTPIP1/SPN/MSN/EZR	6
celltypes.CD4 T cell.down	celltypes	CD4 T cell	down	CC	GO:0019908	nuclear cyclin-dependent protein kinase holoenzyme complex	6/2087	14/15236	0.428571	3.12876	3.17461	0.00735481	0.0421394	0.0325541	MED13/CDK12/CDK9/CDK13/CDK19/RB1	6
celltypes.CD4 T cell.down	celltypes	CD4 T cell	down	CC	GO:1902554	serine/threonine protein kinase complex	28/2087	130/15236	0.215385	1.5724	2.61116	0.00918821	0.0522159	0.0403385	RB1CC1/MED13/CDK12/CSNK2A1/CDK9/PRKAR2A/PHKB/CCNG2/CDK13/ZBTB7A/PRKX/CDKN2D/TANK/PRKAR2B/UVRAG/ERN1/CNPPD1/MNAT1/CDK19/RB1/SESN2/PRKAR1A/TBC1D5/TGFBR1/CDKN1A/TBK1/TBKBP1/CDK14	28
celltypes.CD4 T cell.down	celltypes	CD4 T cell	down	CC	GO:0031082	BLOC complex	7/2087	19/15236	0.368421	2.68963	2.9359	0.0100147	0.0564537	0.0436123	BLOC1S6/HPS1/BLOC1S1/BLOC1S2/PI4K2A/HPS3/DTNBP1	7
celltypes.CD4 T cell.down	celltypes	CD4 T cell	down	CC	GO:0031254	cell trailing edge	6/2087	15/15236	0.4	2.92017	2.96415	0.0108563	0.0592854	0.0457999	DNM2/MYH9/PSTPIP1/SPN/MSN/EZR	6
celltypes.CD4 T cell.down	celltypes	CD4 T cell	down	CC	GO:0031965	nuclear membrane	54/2087	291/15236	0.185567	1.35472	2.43399	0.0115912	0.0628079	0.0485211	LBR/CTDNEP1/SUN2/DNAJB14/TMC6/RB1CC1/XPO1/KPNB1/GAPDH/TOR1AIP2/PAFAH1B1/EMD/KPNA4/ZBTB1/ZBED1/RNF6/SURF4/RNF13/TMEM109/PRNP/ZMPSTE24/DNAJB2/SYNE2/BROX/SMAD3/REPIN1/SLC30A1/BCL2/KPNA2/ABL1/OSBPL3/ALOX5AP/TMEM43/ERN1/TNRC18/MFSD10/TMEM38A/ITPR1/DNAJC1/ATP2A3/TMX4/SYNE1/CD38/QSOX2/LMNA/PLCB1/SLC16A3/SCRN1/CLIC1/DUSP2/ANXA4/MYO6/NR4A1/ALOX5	54
celltypes.CD4 T cell.down	celltypes	CD4 T cell	down	CC	GO:0005912	adherens junction	35/2087	177/15236	0.19774	1.44359	2.36486	0.0151185	0.0770747	0.0595427	KLHL24/EIF4G2/PARK7/APC/DLG1/CTNNB1/ADAM10/SSX2IP/SCRIB/ADD1/MYH9/PPP1CA/TLN1/SNAP23/AHI1/RDX/AFDN/MSN/TBCD/VCL/LLGL2/EPHA4/PPP1R9B/LIMD1/ANXA1/ANXA2/CYTH3/CNN3/EZR/SMAD7/DLG3/CTNNA1/TSPAN33/LYN/DSP	35
celltypes.CD4 T cell.down	celltypes	CD4 T cell	down	CC	GO:0031256	leading edge membrane	34/2087	171/15236	0.19883	1.45155	2.36566	0.0152064	0.0770747	0.0595427	APC/CFL1/DIAPH1/CIB1/RAC1/DOCK8/RHOA/CLCN3/RIGI/MTMR9/ADAM17/SYNE2/VASP/TLN1/PIEZO1/SH3BGRL3/HIP1R/MACF1/KSR1/LCP1/PSD4/PTPRJ/PPP1R9B/ITGB1/EZR/MYO1G/CORO1C/PLXND1/PDE4A/MYO6/PLCG2/AKAP5/FGD2/PLEK	34
celltypes.CD4 T cell.down	celltypes	CD4 T cell	down	CC	GO:0016514	SWI/SNF complex	9/2087	30/15236	0.3	2.19013	2.59946	0.0159845	0.0797489	0.0616086	SMARCD2/DPF2/SMARCE1/ARID1B/SMARCB1/RB1/BCL7A/BCL11A/NCR1	9
celltypes.CD4 T cell.down	celltypes	CD4 T cell	down	CC	GO:0071013	catalytic step 2 spliceosome	20/2087	89/15236	0.224719	1.64055	2.41445	0.0160867	0.0797489	0.0616086	HNRNPU/HNRNPK/SF3B2/HNRNPM/PRP4K/SRRM2/HNRNPR/HNRNPA3/HNRNPA2B1/SNRNP200/RALY/SNRPB/CDC40/LSM7/SLU7/RBM8A/RBM22/TFIP11/ALYREF/WDR83	20
celltypes.CD4 T cell.down	celltypes	CD4 T cell	down	CC	GO:0042405	nuclear inclusion body	5/2087	12/15236	0.416667	3.04185	2.81894	0.0164794	0.079994	0.0617979	STUB1/PABPN1/NBN/SLF1/ATXN1	5
celltypes.CD4 T cell.down	celltypes	CD4 T cell	down	CC	GO:0090575	RNA polymerase II transcription regulator complex	43/2087	229/15236	0.187773	1.37082	2.25255	0.0185211	0.0886728	0.0685026	HNRNPU/TAF7/DRAP1/STAT2/CTNNB1/TLE3/STAT6/POU2F1/ATF6B/ARNT/TAF12/TCEA1/CREM/NCOA1/SMAD3/TCF3/JUND/TADA3/MED25/NCOA2/MED26/TFDP2/RFX5/HIF1A/MNAT1/STAT4/BACH1/NFIL3/LMO4/RB1/NFATC2/MAFF/JUN/ANXA2/SMAD7/RUNX3/RXRA/FOS/SMAD5/FOSL2/TCF4/CEBPD/POU2AF1	43
celltypes.CD4 T cell.down	celltypes	CD4 T cell	down	CC	GO:0016234	inclusion body	16/2087	69/15236	0.231884	1.69285	2.29801	0.0221821	0.101342	0.0782896	STUB1/ARIH1/PABPN1/NBN/HSPA1A/HTT/FBXO7/PRNP/DNAJB2/SLF1/KEAP1/SQSTM1/PICALM/EPS15/ATXN1/HERPUD1	16
celltypes.CD4 T cell.down	celltypes	CD4 T cell	down	CC	GO:0032154	cleavage furrow	13/2087	53/15236	0.245283	1.79067	2.29716	0.0240256	0.105083	0.08118	SEPTIN2/PPP1CC/RHOA/MYH9/ARF6/PSTPIP1/RAB11FIP4/RDX/SEPTIN7/SSH1/ITGB1/RHOB/RHOC	13
celltypes.CD4 T cell.down	celltypes	CD4 T cell	down	CC	GO:0090533	cation-transporting ATPase complex	11/2087	45/15236	0.244444	1.78455	2.09976	0.0370698	0.150622	0.116361	ATP6V0E1/ATP6V1E1/ATP6AP1/ATP6V1D/VMA22/ATP1B3/ATP6V0C/ATP6V0B/ATP6V0D1/TCIRG1/ATP6V1A	11
celltypes.CD4 T cell.down	celltypes	CD4 T cell	down	CC	GO:0000220	vacuolar proton-transporting V-type ATPase, V0 domain	4/2087	10/15236	0.4	2.92017	2.41982	0.0371559	0.150622	0.116361	ATP6V0C/ATP6V0B/ATP6V0D1/TCIRG1	4
celltypes.CD4 T cell.down	celltypes	CD4 T cell	down	CC	GO:0042564	NLS-dependent protein nuclear import complex	4/2087	10/15236	0.4	2.92017	2.41982	0.0371559	0.150622	0.116361	KPNB1/KPNA1/KPNA4/KPNA2	4
celltypes.CD4 T cell.down	celltypes	CD4 T cell	down	CC	GO:0060187	cell pole	4/2087	10/15236	0.4	2.92017	2.41982	0.0371559	0.150622	0.116361	RAB8B/GNB5/PI4K2A/RDX	4
celltypes.CD4 T cell.down	celltypes	CD4 T cell	down	CC	GO:0099572	postsynaptic specialization	62/2087	363/15236	0.170799	1.24691	1.8968	0.0372856	0.150622	0.116361	ANP32E/MIB1/HNRNPH2/EGLN1/DLG1/KPNA1/DBNL/CTNNB1/CLSTN1/SH3KBP1/PDPK1/FMR1/PJA2/DNM2/ABI1/ARF1/ADAM10/AKAP9/NPTN/CASP3/MDM2/DLGAP4/SOS1/SRGAP2/SCRIB/ADD1/NSF/PRNP/CAMK2D/CHRNB1/USP8/ABHD17B/ABHD17A/SEPTIN11/CPEB4/SLC30A1/HIP1R/BCR/ABL1/PLEKHA5/AGAP3/NEO1/DTNBP1/GPSM2/IQSEC1/CAMK2N1/PTK2B/ITPR1/FABP5/EPHA4/PPP1R9B/PDE4B/SIPA1L3/CLSTN3/DLG3/SYT11/SIPA1L1/SEMA4B/ABI3/RGS9/AKAP5/LYN	62
celltypes.CD4 T cell.down	celltypes	CD4 T cell	down	CC	GO:0098533	ATPase dependent transmembrane transport complex	12/2087	51/15236	0.235294	1.71775	2.04544	0.0396844	0.158511	0.122455	ATP6V0E1/ATP6V1E1/ATP6AP1/ATP6V1D/VMA22/ATP1B3/ATP6V0C/ATP6V0B/ATP6V0D1/TCIRG1/ATP6V1A/ABCA2	12
celltypes.CD4 T cell.down	celltypes	CD4 T cell	down	CC	GO:0032279	asymmetric synapse	60/2087	353/15236	0.169972	1.24087	1.82413	0.0433551	0.170613	0.131804	ANP32E/MIB1/HNRNPH2/EGLN1/DLG1/KPNA1/DBNL/CTNNB1/CLSTN1/SH3KBP1/PDPK1/FMR1/PJA2/DNM2/ABI1/ARF1/ADAM10/AKAP9/NPTN/CASP3/MDM2/SOS1/SRGAP2/SCRIB/ADD1/NSF/PRNP/CAMK2D/USP8/ABHD17B/ABHD17A/CPEB4/SLC30A1/HIP1R/BCR/ABL1/PLEKHA5/AGAP3/NEO1/DTNBP1/GPSM2/IQSEC1/CAMK2N1/PTK2B/ITPR1/FABP5/EPHA4/PPP1R9B/YWHAH/PDE4B/PLXNC1/ITGB1/CLSTN3/DLG3/SYT11/SIPA1L1/SEMA4B/ABI3/RGS9/AKAP5	60
celltypes.CD4 T cell.down	celltypes	CD4 T cell	down	CC	GO:0072562	blood microparticle	17/2087	81/15236	0.209877	1.53219	1.91323	0.0456984	0.174254	0.134617	GRIPAP1/HSPA1A/YWHAZ/TFRC/TGFB1/MSN/APOL1/ANXA5/ZBTB38/SLC2A1/STOM/CLIC1/GSN/HBA1/HBB/HBA2/JCHAIN	17
celltypes.CD4 T cell.down	celltypes	CD4 T cell	down	CC	GO:0030904	retromer complex	6/2087	20/15236	0.3	2.19013	2.12175	0.0461188	0.174254	0.134617	SNX3/DCTN1/SNX5/VPS26A/SNX2/TBC1D5	6
celltypes.CD4 T cell.down	celltypes	CD4 T cell	down	CC	GO:0098685	Schaffer collateral - CA1 synapse	18/2087	88/15236	0.204545	1.49327	1.84878	0.050706	0.189081	0.146071	PTPRA/PPP3R1/PAFAH1B1/CTNNB1/ROCK1/SLC30A1/BCR/RAP2A/DTNBP1/ABR/PTK2B/ITPR1/EPHA4/PPP3CA/ITGB1/NTNG2/RHOB/HIP1	18
celltypes.CD4 T cell.down	celltypes	CD4 T cell	down	CC	GO:0070938	contractile ring	4/2087	11/15236	0.363636	2.6547	2.18713	0.0522069	0.189081	0.146071	BLOC1S6/KIF20B/MYH9/UTRN	4
celltypes.CD4 T cell.down	celltypes	CD4 T cell	down	CC	GO:0032153	cell division site	14/2087	66/15236	0.212121	1.54858	1.77931	0.0607955	0.210377	0.162523	SEPTIN2/PPP1CC/RHOA/MYH9/SEPTIN11/ARF6/PSTPIP1/RAB11FIP4/RDX/SEPTIN7/SSH1/ITGB1/RHOB/RHOC	14
celltypes.CD4 T cell.down	celltypes	CD4 T cell	down	CC	GO:0031594	neuromuscular junction	15/2087	73/15236	0.205479	1.50009	1.70629	0.0678023	0.228461	0.176493	DLG1/DNAJC5/CRKL/DLGAP4/FCHSD1/MYH9/CHRNB1/FCHSD2/UTRN/EPHA4/PRKAR1A/ITGB1/SYNGR2/DLG3/F2R	15
celltypes.CD4 T cell.down	celltypes	CD4 T cell	down	CC	GO:0030877	beta-catenin destruction complex	4/2087	12/15236	0.333333	2.43348	1.97903	0.0700706	0.228461	0.176493	APC/CTNNB1/GSK3B/AXIN1	4
celltypes.CD4 T cell.down	celltypes	CD4 T cell	down	CC	GO:0038201	TOR complex	4/2087	12/15236	0.333333	2.43348	1.97903	0.0700706	0.228461	0.176493	MAPKAP1/PRR5/SESN2/PRR5L	4
celltypes.CD4 T cell.down	celltypes	CD4 T cell	down	CC	GO:1990909	Wnt signalosome	4/2087	12/15236	0.333333	2.43348	1.97903	0.0700706	0.228461	0.176493	APC/CTNNB1/GSK3B/AXIN1	4
celltypes.CD4 T cell.down	celltypes	CD4 T cell	down	MF	GO:0023023	MHC protein complex binding	22/2083	34/14933	0.647059	4.63876	8.55197	1.37844e-11	1.5974e-08	1.28449e-08	HSP90AA1/TAPBP/CYRIB/TAPBPL/CD81/CD8A/HLA-DOA/CD74/HLA-DPB1/HLA-DMA/HLA-DMB/KLRC2/HLA-DPA1/KLRC1/KLRD1/HLA-DRA/HLA-DRB1/MS4A1/HLA-DQB1/HLA-DRB5/LILRB1/HLA-DQA1	22
celltypes.CD4 T cell.down	celltypes	CD4 T cell	down	MF	GO:0031625	ubiquitin protein ligase binding	83/2083	290/14933	0.286207	2.05181	7.2824	4.04063e-11	1.5974e-08	1.28449e-08	DAZAP2/ELOB/JAK1/GABARAP/APC/TMBIM6/FBXW7/AUP1/STUB1/ARIH1/VCP/LAPTM5/RIPK1/PRDX6/UBE2L3/CTNNB1/SH3KBP1/HSP90AA1/TPI1/BAG1/MFN2/DNAJA1/PRKAR2A/GSK3B/UBXN7/SKI/CUL3/HSPA1A/MDM2/RIGI/UBC/STX8/WBP1L/HAPSTR1/FBXO7/UBE2W/PARP1/TSG101/TXNIP/DNAJB2/KDM4A/SLF1/ATP6V0C/SMAD3/TRIOBP/YWHAZ/SQSTM1/TANK/BCL2/MAP1LC3B/PRKAR2B/UBB/DERL1/HIF1A/UBE2J1/UBE2A/AXIN1/PTK2B/VCL/RALB/RB1/PRKAR1A/JUN/SMC6/TRAF4/TGFBR1/C…	83
celltypes.CD4 T cell.down	celltypes	CD4 T cell	down	MF	GO:1901981	phosphatidylinositol phosphate binding	54/2083	171/14933	0.315789	2.26389	6.69248	2.36399e-09	6.87587e-07	5.52901e-07	MAPKAP1/PLEKHB2/VPS36/AKT1/WASHC2C/DNM2/GSDMD/ARHGAP9/SNX14/GOLPH3/RAB35/CERT1/SNX3/WDR45/ARAP1/SNX5/PLEKHA3/ATG2A/ZFYVE16/IQGAP2/SNX11/FCHSD2/TTPAL/HIP1R/PLEKHA5/PLEKHF1/WIPI1/DENND1B/SNX18/PICALM/ARFIP1/RCSD1/ANXA2/CGAS/CYTH3/CAPG/IQGAP1/RUBCN/MYO1G/ZFYVE28/PLCB1/SESTD1/ARAP2/SYTL2/FCHO2/SNX10/HIP1/DAPP1/SNX22/GSN/NCF4/FGD2/BTK/RUBCNL	54
celltypes.CD4 T cell.down	celltypes	CD4 T cell	down	MF	GO:0042287	MHC protein binding	19/2083	32/14933	0.59375	4.25659	7.42475	2.89876e-09	6.87587e-07	5.52901e-07	ATP5F1B/VCP/PILRB/TAPBP/CYRIB/TUBB4B/MARCHF8/TAP1/DERL1/TAP2/CD81/KLRK1/CD8A/CD74/KLRD1/FCRL6/LILRB1/MARCHF1/CD244	19
celltypes.CD4 T cell.down	celltypes	CD4 T cell	down	MF	GO:0042605	peptide antigen binding	17/2083	28/14933	0.607143	4.3526	7.14902	1.2486e-08	2.46807e-06	1.98462e-06	HLA-F/HLA-A/HLA-B/HLA-C/TAPBP/TAP1/TAP2/HLA-DOA/HLA-DPB1/HLA-DMA/HLA-DMB/HLA-DPA1/HLA-DRA/HLA-DRB1/HLA-DQB1/HLA-DRB5/HLA-DQA1	17
celltypes.CD4 T cell.down	celltypes	CD4 T cell	down	MF	GO:0003823	antigen binding	24/2083	52/14933	0.461538	3.30876	6.71455	2.112e-08	3.57834e-06	2.87741e-06	ITGA4/HLA-F/HLA-A/HLA-B/HLA-C/TAPBP/TAP1/SLAMF1/TAP2/HLA-DOA/HLA-DPB1/CD40/HLA-DMA/HLA-DMB/KLRC2/HLA-DPA1/KLRD1/JCHAIN/HLA-DRA/HLA-DRB1/HLA-DQB1/HLA-DRB5/HLA-DQA1/IGLL5	24
celltypes.CD4 T cell.down	celltypes	CD4 T cell	down	MF	GO:0140297	DNA-binding transcription factor binding	105/2083	453/14933	0.231788	1.66169	5.75796	5.49917e-08	7.68479e-06	6.17948e-06	STK4/DAZAP2/PTMA/PARK7/CGGBP1/TAF7/THRAP3/NSD1/MED13/HIF1AN/EP300/USF2/CREBBP/CTNNB1/PARP9/BAZ2A/HMGN3/PURB/DNAJA1/GSK3B/CRKL/PPARA/UBXN7/COMMD8/SKI/ARNT/SMARCE1/TAF12/VHL/RNF6/KAT5/TMF1/UHRF2/NBN/LRIF1/HDAC5/DAPK3/NCOR1/SPEN/WWP2/JMJD1C/RBPJ/ADD1/HMGB1/PARP1/ASAH1/CREM/ZBTB7A/NCOA3/LCOR/NCOA1/HDAC8/SMAD3/SIRT2/TCF3/TADA3/KAT2B/MED25/YWHAZ/RAD23B/NCOA2/MAD2L2/KEAP1/ZBTB49/TACC1/SP100/BCL2/HIRA/DT…	105
celltypes.CD4 T cell.down	celltypes	CD4 T cell	down	MF	GO:0019902	phosphatase binding	53/2083	181/14933	0.292818	2.09921	5.99025	5.83162e-08	7.68479e-06	6.17948e-06	JAK1/PPP3R1/PPP6R1/VCP/PPP1CC/DLG1/CARHSP1/CSK/PPP1R18/CTNNB1/ENSA/HSP90AA1/STAT6/CDC27/PPARA/AP3B1/PPP1R15A/PIK3R1/SHOC2/PHACTR4/CEP192/PTPN1/SNX3/MTMR9/GRB2/SMAD3/PPP1R3D/LGALS3/PPP1CA/ARPP19/BCL2/EIF2AK3/NHERF1/CTSC/ATP2B4/ELL/PPP1R9B/NFATC2/MAP3K5/MAPK1/MAST2/IQGAP1/GNA12/DLG3/SYTL2/TBK1/ITGA1/FCRL3/CD22/AKAP5/FCRL6/LILRB1/SYK	53
celltypes.CD4 T cell.down	celltypes	CD4 T cell	down	MF	GO:0003779	actin binding	95/2083	412/14933	0.230583	1.65304	5.41183	3.0504e-07	3.20399e-05	2.57639e-05	HNRNPU/ARPC5/P4HB/TPM3/CFL1/CORO1B/BLOC1S6/CAP1/DIAPH1/EMD/DSTN/PPP1R18/DBNL/WDR1/FKBP15/ARPC2/ACTR2/INO80/ARPC3/PHACTR4/SSH2/ACTR3/KLHL5/WAS/ADD1/MYH9/SYNE2/IQGAP2/ARPC4/FMNL3/WIPF1/FMNL1/VASP/TPM4/DAAM1/CAPZA1/TRIOBP/VPS18/TLN1/LSP1/UTRN/HIP1R/MACF1/LCP1/ABL1/TAGLN2/MYO9B/WIPF2/RDX/AFDN/MYO5A/MSN/ARPC5L/SNTB2/INPPL1/LASP1/LUZP1/SSH1/VCL/S100A4/KLHL2/PPP1R9B/DIAPH2/PXK/YWHAH/RCSD1/ITGB1/VASH1/FL…	95
celltypes.CD4 T cell.down	celltypes	CD4 T cell	down	MF	GO:0003712	transcription coregulator activity	102/2083	467/14933	0.218415	1.56582	5.00164	1.68169e-06	0.000134425	0.000108094	HNRNPU/EWSR1/EID1/PARK7/TBL1XR1/BRD4/CIR1/ATF7IP/THRAP3/RALY/NIPBL/TCF25/NSD1/MED13/HIF1AN/MECP2/EP300/KAT6B/SMARCD2/CREBBP/MED13L/UBE2L3/CTNNB1/PARP9/CALCOCO1/KMT2D/KDM5A/DPF2/TLE3/SERTAD2/QKI/RBCK1/SSBP3/ZMYND11/ZBED1/SMARCE1/CCDC124/CBFA2T2/TAF12/KAT5/BTG1/HSPA1A/ARID1B/KMT2E/BTG2/NCOR1/SPEN/JMJD1C/KMT2C/HMGB1/CPAP/TSG101/ASAH1/NCOA3/LCOR/NCOA1/SIAH2/NFKBIB/TADA3/KAT2B/MIDEAS/NCOA2/TRIM38/MED2…	102
celltypes.CD4 T cell.down	celltypes	CD4 T cell	down	MF	GO:0004197	cysteine-type endopeptidase activity	28/2083	80/14933	0.35	2.50915	5.44905	1.70015e-06	0.000134425	0.000108094	USP7/USP48/ATG4B/USP34/USP9X/USP11/CASP3/CTSO/USP12/USP8/CAPNS1/CASP4/CTSD/CARD16/CAPN15/CFLAR/RCE1/ATG4D/CAPN1/CASP1/CTSC/CASP7/CAPN2/CTSS/CAPN12/CTSZ/CTSH/CTSW	28
celltypes.CD4 T cell.down	celltypes	CD4 T cell	down	MF	GO:0045296	cadherin binding	76/2083	323/14933	0.235294	1.68682	5.02425	2.06124e-06	0.00015279	0.000122861	HNRNPK/KIF5B/KTN1/SEPTIN2/EIF4G2/AHSA1/PARK7/USO1/DDX6/CORO1B/BZW1/CSNK1D/GOLGA2/LRRFIP1/CHMP4B/DLG1/CLINT1/EMD/PRDX6/DBNL/CTNNB1/LDHA/CRKL/SLK/ABI1/NUMB/HSPA1A/PTPN1/SCRIB/SNX5/ADD1/MYH9/UNC45A/USP8/PFKP/VASP/PLIN3/CAPZA1/EHD1/PPP1CA/BSG/YWHAZ/SH3GLB1/TLN1/EPS15L1/CC2D1A/F11R/MACF1/TAGLN2/RDX/AFDN/NEO1/PTPRJ/SEPTIN7/CAST/LASP1/VCL/PICALM/SNX2/EPS15/ANXA1/ITGB1/ANXA2/FLNA/CNN3/EZR/CAPG/IQGAP1/ARH…	76
celltypes.CD4 T cell.down	celltypes	CD4 T cell	down	MF	GO:0017124	SH3 domain binding	34/2083	111/14933	0.306306	2.19591	5.09163	4.47008e-06	0.000311854	0.000250767	SH3KBP1/RAD9A/DNM2/QKI/ABI1/SH3BGRL/ADAM10/SOS1/RUFY1/WAS/ADAM17/GRB2/USP8/WIPF1/VASP/ARHGAP17/PTTG1/HIP1R/ABL1/UVRAG/INPPL1/OSTF1/EPS15/SH3BP2/RAPGEF1/CYBA/PLSCR1/INPP5D/SH3BP5/PTPN12/ADAM19/PTPN22/AKAP5/LYN	34
celltypes.CD4 T cell.down	celltypes	CD4 T cell	down	MF	GO:0140678	molecular function inhibitor activity	93/2083	431/14933	0.215777	1.5469	4.63861	8.10018e-06	0.000503993	0.00040527	CALM2/PARK7/ANP32E/NEAT1/VTI1B/XIST/TMBIM6/XIAP/TAOK3/HEXIM1/GAPDH/LAMP1/CIB1/SERPINB1/PARP9/ENSA/SERPINB9/KDM5A/AKT1/SERPINB6/PRKAR2A/TMX1/SKI/VAMP8/CASP3/HSPA1A/HTRA2/BIRC6/STX8/ADRM1/PRNP/MGAT5/CAMK2D/TXNIP/IQGAP2/OAZ1/PPP1R12A/OAZ2/WDTC1/CDKN2D/LGALS3/KAT2B/SLC30A1/ARPP19/PTTG1/KEAP1/PPP2R5A/WARS1/TANK/BCL2/DTX3L/CARD16/DYNLL1/PRKAR2B/NEDD4L/LY6E/PPP1R14B/DUSP22/PCYT1A/CHP1/ID3/CAST/CAMK2N1/I…	93
celltypes.CD4 T cell.down	celltypes	CD4 T cell	down	MF	GO:0005096	GTPase activator activity	60/2083	248/14933	0.241935	1.73443	4.69562	9.63372e-06	0.000503993	0.00040527	RALBP1/BNIP2/RASAL3/RABEP1/RAB3GAP2/RALGAPA1/GDI2/ARHGAP9/GIT2/SOS1/ARHGAP19/NCKAP1L/FAM13B/RABGAP1L/SRGAP2/ARAP1/DOCK2/GNB5/IQGAP2/TBC1D22A/ARHGAP17/ARFGAP3/BCR/TBC1D25/ARHGAP25/MYO9B/NF1/AGAP3/RAPGEF2/ABR/TAGAP/RABEP2/TBCD/RP2/TBC1D1/LLGL2/ARHGAP35/TBC1D2B/ARHGAP10/JUN/TBC1D5/SIPA1/SIPA1L3/ARHGAP26/PREX1/IQGAP1/USP6NL/PLCB1/ARAP2/ARHGAP18/SIPA1L1/EVI5/CHN2/ARHGEF12/RGS2/RGS9/RGS3/AGAP1/VAV3/TBC…	60
celltypes.CD4 T cell.down	celltypes	CD4 T cell	down	MF	GO:0019003	GDP binding	24/2083	69/14933	0.347826	2.49356	5.00647	1.04067e-05	0.000514263	0.000413528	RAB22A/RAB2A/GNAI3/UCP2/RAB18/RAP1B/RAP2B/RAB14/RRAGC/RAB8B/RAB5C/RAB29/RAB35/DYNC1LI1/RAB8A/ARF6/RAP2C/RAP2A/RALB/RAB9A/RAB27A/RRAS2/RHOB/RAB31	24
celltypes.CD4 T cell.down	celltypes	CD4 T cell	down	MF	GO:0016922	nuclear receptor binding	36/2083	130/14933	0.276923	1.98526	4.54254	2.8796e-05	0.00121972	0.000980795	PARK7/TAF7/THRAP3/NSD1/MED13/EP300/CTNNB1/BAZ2A/HMGN3/SMARCE1/RNF6/TMF1/LRIF1/NCOR1/JMJD1C/PARP1/ASAH1/ZBTB7A/NCOA3/LCOR/NCOA1/SMAD3/TADA3/MED25/NCOA2/TACC1/HIF1A/TOB2/WIPI1/PRKCB/YWHAH/NR4A2/ACTN4/RXRA/OASL/NR4A1	36
celltypes.CD4 T cell.down	celltypes	CD4 T cell	down	MF	GO:0003924	GTPase activity	67/2083	297/14933	0.225589	1.61725	4.32591	3.45214e-05	0.0013726	0.00110373	SEPTIN2/RAB22A/RAB2A/GNAI3/SAR1A/GNAI2/RAB18/RAC1/RAP1B/RAP2B/RAB14/RRAGC/MFN2/RAB8B/GNB1/DNM2/RHOA/RAB6A/ARL1/OPA1/ARF1/RAB5C/ARL5A/MFN1/RAB24/RAB29/GTPBP1/RAB35/MTG1/ATL3/RAB4B/GNB5/TUBB4B/GBP3/SEPTIN11/ARL8A/RAB1B/RAB8A/RGS19/ARF3/ARF6/GNA13/RAP2C/RAP2A/GBP4/AGAP3/SEPTIN7/RALB/RHOBTB2/ARHGAP35/RAB9A/GBP5/RAB30/GNA12/RHOQ/RAB27A/RAB37/RRAS2/RHOB/RGS2/RHOBTB3/RHOC/RGS9/RGS3/AGAP1/RAB31/TUBB6	67
celltypes.CD4 T cell.down	celltypes	CD4 T cell	down	MF	GO:0031267	small GTPase binding	63/2083	275/14933	0.229091	1.64235	4.32865	3.58773e-05	0.0013726	0.00110373	RALBP1/MAPKAP1/CCDC186/XPO1/PPP6R1/KPNB1/DIAPH1/CIB1/ATP6AP1/AP1G1/EXOC5/GOLGA4/RAB3GAP2/GDI2/GIT2/RAB29/KIF3B/DAPK3/ROCK1/WAS/RABGAP1L/SRGAP2/DOCK2/AKAP13/CYRIB/IQGAP2/FMNL3/FMNL1/RGP1/DAAM1/RNF41/EHD1/TRIOBP/RAB8A/RAB11FIP5/RAB11FIP4/DVL3/MYO9B/BICD2/TMEM127/AFDN/MYO5A/DENND1B/BICD1/PICALM/DIAPH2/CDC42EP3/FLNA/RAB11FIP1/IQGAP1/SYTL3/CORO1C/USP6NL/SYTL2/GGA2/YBX3/EVI5/PLEKHG3/RHOBTB3/CYRIA/PLEKH…	63
celltypes.CD4 T cell.down	celltypes	CD4 T cell	down	MF	GO:0106310	protein serine kinase activity	74/2083	346/14933	0.213873	1.53325	4.04054	8.92735e-05	0.00311407	0.00250408	STK4/PRP4K/STK10/SMG1/TAOK3/CSNK1D/CDK12/MARK3/CSNK2A1/RIPK1/PRKD3/PDPK1/CDK9/AKT1/MAP2K1/GSK3B/MAP3K2/SLK/PIKFYVE/HIPK3/NEK7/CAMK1D/BRAF/UHMK1/MAP4K5/DAPK3/ROCK1/MAP2K2/TAOK2/GAK/CDK13/CAMK2D/CSNK1G3/PRKX/CDK17/AKT3/IRAK1/EIF2AK2/RPS6KA1/MKNK2/SIK2/RIOK3/SRPK2/KSR1/BCR/RIPK3/ERN1/SIK3/TESK1/EIF2AK3/MAPKAPK2/STK39/CDK19/STK40/BMP2K/MAP2K3/PRKCD/PRKCB/MAP3K5/MAPK1/VRK2/MAST2/RIPK2/NEK8/LIMK1/PIK3C…	74
celltypes.CD4 T cell.down	celltypes	CD4 T cell	down	MF	GO:0140996	histone H3 kinase activity	72/2083	341/14933	0.211144	1.51369	3.8634	0.000167112	0.00414946	0.00333665	STK4/PRP4K/JAK1/STK10/SMG1/TAOK3/BAZ1B/CSNK1D/MARK3/CSNK2A1/RIPK1/CSK/PDPK1/AKT1/MAP2K1/GSK3B/SLK/PIKFYVE/HIPK3/NEK7/BRAF/UHMK1/MAP4K5/DAPK3/ROCK1/MAP2K2/TAOK2/GAK/CSNK1G3/PRKX/AKT3/IRAK1/EIF2AK2/RPS6KA1/MKNK2/SIK2/RIOK3/SRPK2/KSR1/BCR/ABL1/RIPK3/ERN1/JAK2/SIK3/TESK1/EIF2AK3/MAPKAPK2/STK39/STK40/BMP2K/MAP2K3/PRKCD/PTK2B/PRKCB/EPHA4/VRK2/MAST2/RIPK2/NEK8/LIMK1/PIK3CG/TBK1/TRIO/KIT/MATK/BLK/DAPK2/C…	72
celltypes.CD4 T cell.down	celltypes	CD4 T cell	down	MF	GO:0004721	phosphoprotein phosphatase activity	40/2083	162/14933	0.246914	1.77012	3.96792	0.00017541	0.00414946	0.00333665	CTDNEP1/UBLCP1/PPP2CA/PTPRA/PPP3R1/PTP4A2/PTP4A1/PDP2/PPP1CC/DLG1/PPTC7/RNGTT/SSH2/PTPN1/HTT/PPM1K/PPM1A/PPM1D/SBF1/PPP1R3D/PPP1CA/DUSP1/CTDSP1/PTPN7/DUSP22/PTPN18/PTPRJ/PPP4R1/SSH1/PTPN4/FIG4/PPP3CA/PPM1L/PTPRE/PTPN12/DUSP2/PTPN22/DUSP10/DUSP5/DUSP4	40
celltypes.CD4 T cell.down	celltypes	CD4 T cell	down	MF	GO:0019956	chemokine binding	12/2083	28/14933	0.428571	3.07242	4.4192	0.000181951	0.00414946	0.00333665	ITGA4/ZFP36/HMGB1/PLP2/ITGB1/CCR6/CXCR4/CXCR3/CXCR5/CXCR6/CCR5/CX3CR1	12
celltypes.CD4 T cell.down	celltypes	CD4 T cell	down	MF	GO:0046332	SMAD binding	23/2083	76/14933	0.302632	2.16956	4.11544	0.000184471	0.00414946	0.00333665	STUB1/CTNNB1/USP9X/PURB/SKI/SMURF2/PPM1A/PARP1/ZBTB7A/SMAD3/TGIF1/AXIN1/SKIL/BMPR1A/PMEPA1/JUN/ZMIZ1/FLNA/TGFBR1/SMAD7/FOS/SMAD5/TGFBR3	23
celltypes.CD4 T cell.down	celltypes	CD4 T cell	down	MF	GO:0004842	ubiquitin-protein transferase activity	82/2083	402/14933	0.20398	1.46233	3.78329	0.000204323	0.00414946	0.00333665	TRIM44/RBBP6/WSB1/HUWE1/HECTD1/XIAP/MIB1/UBE2H/STUB1/ARIH1/UBE2R2/ARIH2/RC3H2/UBR1/MKRN1/UBR4/RC3H1/UBE2L3/HERC1/NT5C2/UBE2O/PJA2/RBCK1/ZFP91/TRIM56/CUL3/UBE2L6/VHL/RNF6/RNF213/UHRF2/BIRC3/SMURF2/MDM2/BIRC6/UBE2M/HERC5/WWP2/RNF115/FBXO7/RNF141/UBE2W/RNF13/UBA7/RNF169/RNF167/TRAF6/RNF121/RNF166/PCGF5/SIAH2/RNF146/RNF41/PCGF3/RNF130/UBR2/MARCHF8/HECTD4/BARD1/VPS18/SYVN1/TRIM38/UBE2E3/TRIM26/DTX3L/C…	82
celltypes.CD4 T cell.down	celltypes	CD4 T cell	down	MF	GO:0003725	double-stranded RNA binding	22/2083	72/14933	0.305556	2.19052	4.07692	0.000216698	0.00414946	0.00333665	HNRNPU/MBNL1/CLTC/RC3H2/ELAVL1/LRRFIP1/RC3H1/DICER1/RIGI/TUBB4B/EIF2AK2/DDX60/TFRC/IFIH1/MSN/RFTN1/SIDT2/STRBP/AGO4/OAS1/ZBP1/OASL	22
celltypes.CD4 T cell.down	celltypes	CD4 T cell	down	MF	GO:0141003	histone H2AX kinase activity	71/2083	338/14933	0.210059	1.50591	3.78776	0.000217163	0.00414946	0.00333665	STK4/PRP4K/JAK1/STK10/SMG1/TAOK3/BAZ1B/CSNK1D/MARK3/CSNK2A1/RIPK1/CSK/PDPK1/AKT1/MAP2K1/GSK3B/SLK/PIKFYVE/HIPK3/NEK7/BRAF/UHMK1/MAP4K5/DAPK3/ROCK1/MAP2K2/TAOK2/GAK/CSNK1G3/PRKX/AKT3/IRAK1/EIF2AK2/RPS6KA1/MKNK2/SIK2/RIOK3/SRPK2/KSR1/BCR/ABL1/RIPK3/ERN1/JAK2/SIK3/TESK1/EIF2AK3/MAPKAPK2/STK39/STK40/BMP2K/MAP2K3/PRKCD/PTK2B/EPHA4/VRK2/MAST2/RIPK2/NEK8/LIMK1/PIK3CG/TBK1/TRIO/KIT/MATK/BLK/DAPK2/CIITA/B…	71
celltypes.CD4 T cell.down	celltypes	CD4 T cell	down	MF	GO:0140823	histone H2BS36 kinase activity	53/2083	235/14933	0.225532	1.61684	3.8373	0.000219205	0.00414946	0.00333665	STK4/PRP4K/STK10/SMG1/TAOK3/CSNK1D/MARK3/CSNK2A1/RIPK1/PDPK1/AKT1/GSK3B/SLK/PIKFYVE/HIPK3/NEK7/BRAF/UHMK1/MAP4K5/DAPK3/ROCK1/TAOK2/GAK/CSNK1G3/PRKX/AKT3/IRAK1/EIF2AK2/RPS6KA1/MKNK2/SIK2/RIOK3/SRPK2/KSR1/BCR/RIPK3/ERN1/SIK3/EIF2AK3/MAPKAPK2/STK39/STK40/BMP2K/VRK2/MAST2/RIPK2/NEK8/LIMK1/PIK3CG/TBK1/TRIO/DAPK2/CIITA	53
celltypes.CD4 T cell.down	celltypes	CD4 T cell	down	MF	GO:0140855	histone H3S57 kinase activity	53/2083	235/14933	0.225532	1.61684	3.8373	0.000219205	0.00414946	0.00333665	STK4/PRP4K/STK10/SMG1/TAOK3/CSNK1D/MARK3/CSNK2A1/RIPK1/PDPK1/AKT1/GSK3B/SLK/PIKFYVE/HIPK3/NEK7/BRAF/UHMK1/MAP4K5/DAPK3/ROCK1/TAOK2/GAK/CSNK1G3/PRKX/AKT3/IRAK1/EIF2AK2/RPS6KA1/MKNK2/SIK2/RIOK3/SRPK2/KSR1/BCR/RIPK3/ERN1/SIK3/EIF2AK3/MAPKAPK2/STK39/STK40/BMP2K/VRK2/MAST2/RIPK2/NEK8/LIMK1/PIK3CG/TBK1/TRIO/DAPK2/CIITA	53
celltypes.CD4 T cell.down	celltypes	CD4 T cell	down	MF	GO:0140995	histone H2A kinase activity	53/2083	235/14933	0.225532	1.61684	3.8373	0.000219205	0.00414946	0.00333665	STK4/PRP4K/STK10/SMG1/TAOK3/CSNK1D/MARK3/CSNK2A1/RIPK1/PDPK1/AKT1/GSK3B/SLK/PIKFYVE/HIPK3/NEK7/BRAF/UHMK1/MAP4K5/DAPK3/ROCK1/TAOK2/GAK/CSNK1G3/PRKX/AKT3/IRAK1/EIF2AK2/RPS6KA1/MKNK2/SIK2/RIOK3/SRPK2/KSR1/BCR/RIPK3/ERN1/SIK3/EIF2AK3/MAPKAPK2/STK39/STK40/BMP2K/VRK2/MAST2/RIPK2/NEK8/LIMK1/PIK3CG/TBK1/TRIO/DAPK2/CIITA	53
celltypes.CD4 T cell.down	celltypes	CD4 T cell	down	MF	GO:0140997	histone H4 kinase activity	53/2083	235/14933	0.225532	1.61684	3.8373	0.000219205	0.00414946	0.00333665	STK4/PRP4K/STK10/SMG1/TAOK3/CSNK1D/MARK3/CSNK2A1/RIPK1/PDPK1/AKT1/GSK3B/SLK/PIKFYVE/HIPK3/NEK7/BRAF/UHMK1/MAP4K5/DAPK3/ROCK1/TAOK2/GAK/CSNK1G3/PRKX/AKT3/IRAK1/EIF2AK2/RPS6KA1/MKNK2/SIK2/RIOK3/SRPK2/KSR1/BCR/RIPK3/ERN1/SIK3/EIF2AK3/MAPKAPK2/STK39/STK40/BMP2K/VRK2/MAST2/RIPK2/NEK8/LIMK1/PIK3CG/TBK1/TRIO/DAPK2/CIITA	53
celltypes.CD4 T cell.down	celltypes	CD4 T cell	down	MF	GO:0140998	histone H2B kinase activity	53/2083	235/14933	0.225532	1.61684	3.8373	0.000219205	0.00414946	0.00333665	STK4/PRP4K/STK10/SMG1/TAOK3/CSNK1D/MARK3/CSNK2A1/RIPK1/PDPK1/AKT1/GSK3B/SLK/PIKFYVE/HIPK3/NEK7/BRAF/UHMK1/MAP4K5/DAPK3/ROCK1/TAOK2/GAK/CSNK1G3/PRKX/AKT3/IRAK1/EIF2AK2/RPS6KA1/MKNK2/SIK2/RIOK3/SRPK2/KSR1/BCR/RIPK3/ERN1/SIK3/EIF2AK3/MAPKAPK2/STK39/STK40/BMP2K/VRK2/MAST2/RIPK2/NEK8/LIMK1/PIK3CG/TBK1/TRIO/DAPK2/CIITA	53
celltypes.CD4 T cell.down	celltypes	CD4 T cell	down	MF	GO:0140857	histone H3T45 kinase activity	53/2083	236/14933	0.224576	1.60998	3.80288	0.000245104	0.0044722	0.00359618	STK4/PRP4K/STK10/SMG1/TAOK3/CSNK1D/MARK3/CSNK2A1/RIPK1/PDPK1/AKT1/GSK3B/SLK/PIKFYVE/HIPK3/NEK7/BRAF/UHMK1/MAP4K5/DAPK3/ROCK1/TAOK2/GAK/CSNK1G3/PRKX/AKT3/IRAK1/EIF2AK2/RPS6KA1/MKNK2/SIK2/RIOK3/SRPK2/KSR1/BCR/RIPK3/ERN1/SIK3/EIF2AK3/MAPKAPK2/STK39/STK40/BMP2K/VRK2/MAST2/RIPK2/NEK8/LIMK1/PIK3CG/TBK1/TRIO/DAPK2/CIITA	53
celltypes.CD4 T cell.down	celltypes	CD4 T cell	down	MF	GO:0071889	14-3-3 protein binding	13/2083	33/14933	0.393939	2.82415	4.22353	0.000272209	0.00477424	0.00383905	HLA-F/AKT1/ZFP36/KIF13B/TBC1D22A/PPP1R12A/SRPK2/KSR1/ZFP36L1/YWHAQ/NFATC2/RIPOR1/PRKCE	13
celltypes.CD4 T cell.down	celltypes	CD4 T cell	down	MF	GO:0016755	aminoacyltransferase activity	88/2083	444/14933	0.198198	1.42088	3.62479	0.000335463	0.00568371	0.00457037	TRIM44/RBBP6/WSB1/HUWE1/HECTD1/XIAP/MIB1/UBE2H/STUB1/ARIH1/ATG12/UBE2R2/UBE2I/ARIH2/RC3H2/UBR1/MKRN1/UBR4/RC3H1/UBE2L3/HERC1/NT5C2/UBE2O/PJA2/RBCK1/ZFP91/TRIM56/CUL3/UBE2L6/ZBED1/VHL/RNF6/RNF213/UHRF2/BIRC3/SMURF2/MDM2/BIRC6/UBE2M/HERC5/WWP2/RNF115/FBXO7/RNF141/UBE2W/RNF13/UBA7/ZMIZ2/RNF169/RNF167/TRAF6/RNF121/RNF166/PCGF5/SIAH2/RNF146/RNF41/PCGF3/RNF130/UBR2/MARCHF8/HECTD4/BARD1/VPS18/SYVN1/TRIM…	88
celltypes.CD4 T cell.down	celltypes	CD4 T cell	down	MF	GO:0035591	signaling adaptor activity	32/2083	125/14933	0.256	1.83526	3.77556	0.000378332	0.00631974	0.00508182	MAVS/RIPK1/MAP2K1/FMR1/GNB1/CRKL/ABI1/PIK3R1/MAP2K2/SCRIB/GRB2/AKAP13/GNB5/TRAF6/MYD88/ARF6/KSR1/AXIN1/WWC3/SH2B3/SLA2/RIPK2/TRAF4/DOK2/IQGAP1/IRAK2/ABI3/GAB3/STAP1/BLNK/GNB4/BANK1	32
celltypes.CD4 T cell.down	celltypes	CD4 T cell	down	MF	GO:0043325	phosphatidylinositol-3,4-bisphosphate binding	11/2083	26/14933	0.423077	3.03303	4.17723	0.000387351	0.00638054	0.00513071	MAPKAP1/AKT1/WASHC2C/FCHSD2/HIP1R/MYO1G/SESTD1/HIP1/PLEKHA2/DAPP1/PLEK	11
celltypes.CD4 T cell.down	celltypes	CD4 T cell	down	MF	GO:0034452	dynactin binding	7/2083	12/14933	0.583333	4.18191	4.43947	0.000422942	0.00677851	0.00545072	HOOK3/PAFAH1B1/GSK3B/HTT/SNX5/BICD2/BICD1	7
celltypes.CD4 T cell.down	celltypes	CD4 T cell	down	MF	GO:0004857	enzyme inhibitor activity	67/2083	323/14933	0.20743	1.48707	3.563	0.000464898	0.00725485	0.00583376	PARK7/ANP32E/TMBIM6/XIAP/TAOK3/HEXIM1/GAPDH/CIB1/SERPINB1/PARP9/ENSA/SERPINB9/KDM5A/AKT1/SERPINB6/PRKAR2A/TMX1/SKI/CASP3/HTRA2/BIRC6/PRNP/MGAT5/TXNIP/IQGAP2/OAZ1/PPP1R12A/OAZ2/WDTC1/CDKN2D/LGALS3/KAT2B/ARPP19/PTTG1/PPP2R5A/WARS1/DTX3L/CARD16/DYNLL1/PRKAR2B/PPP1R14B/DUSP22/CHP1/CAST/CAMK2N1/ATP2B4/PPP1R9B/ANXA5/PRKAR1A/ANXA1/APLP2/FURIN/ANXA2/BST2/CDKN1A/GBP5/IQGAP1/PPP1R16B/SERPINI1/CLSTN3/PKIG/S…	67
celltypes.CD4 T cell.down	celltypes	CD4 T cell	down	MF	GO:0097718	disordered domain specific binding	11/2083	27/14933	0.407407	2.9207	4.02173	0.000571839	0.00880781	0.00708252	CLTC/GAPDH/AP2M1/CTNNB1/HSP90AA1/HSPA1A/MDM2/NCOA3/KEAP1/RB1/EZR	11
celltypes.CD4 T cell.down	celltypes	CD4 T cell	down	MF	GO:0140789	histone phosphatase activity	31/2083	125/14933	0.248	1.77791	3.51631	0.000826833	0.0122578	0.00985672	CTDNEP1/UBLCP1/PPP2CA/PTPRA/PTP4A2/PTP4A1/PPP1CC/PPTC7/SSH2/PTPN1/PPM1K/PPM1A/PPM1D/PPP1CA/DUSP1/CTDSP1/PTPN7/DUSP22/PTPN18/PTPRJ/SSH1/PTPN4/PPP3CA/PPM1L/PTPRE/PTPN12/DUSP2/PTPN22/DUSP10/DUSP5/DUSP4	31
celltypes.CD4 T cell.down	celltypes	CD4 T cell	down	MF	GO:0044325	transmembrane transporter binding	30/2083	120/14933	0.25	1.79225	3.50818	0.00086467	0.0126605	0.0101805	CALM2/DIAPH1/CIB1/DLG1/AP2M1/CTNNB1/HSP90AA1/PDE4D/FMR1/ITPR2/AKAP9/HTT/VDAC1/PRNP/CAMK2D/TRAPPC2/YWHAZ/TCAF1/NEDD4L/NHERF1/YWHAQ/PPP1R9B/YWHAH/PDE4B/ATP2A3/FLNA/ACTN4/ID2/HERPUD1/LYN	30
celltypes.CD4 T cell.down	celltypes	CD4 T cell	down	MF	GO:1905394	retromer complex binding	6/2083	10/14933	0.6	4.30139	4.20457	0.000927147	0.0134097	0.010783	M6PR/WASHC2C/SNX3/IGF2R/RCSD1/TBC1D5	6
celltypes.CD4 T cell.down	celltypes	CD4 T cell	down	MF	GO:0002020	protease binding	30/2083	121/14933	0.247934	1.77743	3.45702	0.000999195	0.0137461	0.0110535	PARK7/OS9/POLG/VCP/CLTC/SERPINB9/SERPINB6/GSK3B/CASP3/ADRM1/PRNP/LCOR/SELENOS/SYVN1/BCL2/RIOK3/CARD16/PSAP/CFLAR/DERL1/DVL3/AMFR/MBP/TNFAIP3/ITGB1/FURIN/ANXA2/RIPK2/KIT/BANK1	30
celltypes.CD4 T cell.down	celltypes	CD4 T cell	down	MF	GO:0140791	histone H2AXS140 phosphatase activity	20/2083	70/14933	0.285714	2.04828	3.53937	0.00106631	0.0137461	0.0110535	CTDNEP1/UBLCP1/PPP2CA/PPP1CC/PPTC7/SSH2/PPM1K/PPM1A/PPM1D/PPP1CA/DUSP1/CTDSP1/DUSP22/SSH1/PPP3CA/PPM1L/DUSP2/DUSP10/DUSP5/DUSP4	20
celltypes.CD4 T cell.down	celltypes	CD4 T cell	down	MF	GO:0180004	RNA polymerase II CTD heptapeptide repeat Y1 phosphatase activity	20/2083	70/14933	0.285714	2.04828	3.53937	0.00106631	0.0137461	0.0110535	CTDNEP1/UBLCP1/PPP2CA/PPP1CC/PPTC7/SSH2/PPM1K/PPM1A/PPM1D/PPP1CA/DUSP1/CTDSP1/DUSP22/SSH1/PPP3CA/PPM1L/DUSP2/DUSP10/DUSP5/DUSP4	20
celltypes.CD4 T cell.down	celltypes	CD4 T cell	down	MF	GO:0180005	RNA polymerase II CTD heptapeptide repeat T4 phosphatase activity	20/2083	70/14933	0.285714	2.04828	3.53937	0.00106631	0.0137461	0.0110535	CTDNEP1/UBLCP1/PPP2CA/PPP1CC/PPTC7/SSH2/PPM1K/PPM1A/PPM1D/PPP1CA/DUSP1/CTDSP1/DUSP22/SSH1/PPP3CA/PPM1L/DUSP2/DUSP10/DUSP5/DUSP4	20
celltypes.CD4 T cell.down	celltypes	CD4 T cell	down	MF	GO:0180006	RNA polymerase II CTD heptapeptide repeat S2 phosphatase activity	20/2083	70/14933	0.285714	2.04828	3.53937	0.00106631	0.0137461	0.0110535	CTDNEP1/UBLCP1/PPP2CA/PPP1CC/PPTC7/SSH2/PPM1K/PPM1A/PPM1D/PPP1CA/DUSP1/CTDSP1/DUSP22/SSH1/PPP3CA/PPM1L/DUSP2/DUSP10/DUSP5/DUSP4	20
celltypes.CD4 T cell.down	celltypes	CD4 T cell	down	MF	GO:0180007	RNA polymerase II CTD heptapeptide repeat S5 phosphatase activity	20/2083	70/14933	0.285714	2.04828	3.53937	0.00106631	0.0137461	0.0110535	CTDNEP1/UBLCP1/PPP2CA/PPP1CC/PPTC7/SSH2/PPM1K/PPM1A/PPM1D/PPP1CA/DUSP1/CTDSP1/DUSP22/SSH1/PPP3CA/PPM1L/DUSP2/DUSP10/DUSP5/DUSP4	20
celltypes.CD4 T cell.down	celltypes	CD4 T cell	down	MF	GO:0180008	RNA polymerase II CTD heptapeptide repeat S7 phosphatase activity	20/2083	70/14933	0.285714	2.04828	3.53937	0.00106631	0.0137461	0.0110535	CTDNEP1/UBLCP1/PPP2CA/PPP1CC/PPTC7/SSH2/PPM1K/PPM1A/PPM1D/PPP1CA/DUSP1/CTDSP1/DUSP22/SSH1/PPP3CA/PPM1L/DUSP2/DUSP10/DUSP5/DUSP4	20
celltypes.CD4 T cell.down	celltypes	CD4 T cell	down	MF	GO:0140375	immune receptor activity	31/2083	127/14933	0.244094	1.74991	3.41699	0.00109544	0.0139699	0.0112334	IL2RG/MR1/IFNGR1/IL4R/IL10RA/KLRK1/CCR6/CXCR4/IL18R1/FCER1G/HLA-DOA/CTSH/CXCR3/CXCR5/CXCR6/IL2RB/CD74/IL18RAP/KLRC2/HLA-DPA1/CCR5/KLRC1/KLRD1/CX3CR1/KLRF1/HLA-DRA/FCGR3A/HLA-DRB1/HLA-DQB1/LILRB1/HLA-DQA1	31
celltypes.CD4 T cell.down	celltypes	CD4 T cell	down	MF	GO:0032561	guanyl ribonucleotide binding	72/2083	364/14933	0.197802	1.41804	3.25093	0.00118083	0.0147418	0.0118541	SEPTIN2/RAB22A/RAB2A/GNAI3/SAR1A/GNAI2/UCP2/RABL6/RAB18/RAC1/RAP1B/RAP2B/RAB14/HSP90AA1/RRAGC/MFN2/RAB8B/DNM2/RHOA/RAB6A/ARL1/OPA1/ARF1/RAB5C/RNGTT/ARL5A/MFN1/RAB24/RAB29/GTPBP1/RAB35/RIGI/MTG1/ATL3/RAB4B/DYNC1LI1/ANXA6/TUBB4B/GBP3/SEPTIN11/ARL8A/EHD1/RAB1B/RAB8A/ARF3/ARF6/GNA13/RAP2C/RAP2A/GBP4/AGAP3/SEPTIN7/RP2/RALB/RHOBTB2/ARHGAP35/RAB9A/CGAS/GBP5/RAB30/GNA12/RHOQ/RAB27A/RAB37/RRAS2/RHOB/EHD3/…	72
celltypes.CD4 T cell.down	celltypes	CD4 T cell	down	MF	GO:0016248	channel inhibitor activity	13/2083	38/14933	0.342105	2.45255	3.60956	0.00130849	0.0155187	0.0124789	CALM2/VTI1B/LAMP1/ENSA/VAMP8/STX8/CAMK2D/SLC30A1/BCL2/NEDD4L/ITPR1/STX7/STOM	13
celltypes.CD4 T cell.down	celltypes	CD4 T cell	down	MF	GO:0034236	protein kinase A catalytic subunit binding	7/2083	14/14933	0.5	3.58449	3.89513	0.00141868	0.016659	0.0133958	CSK/PRKAR2A/PJA2/GSK3B/PRKAR2B/PRKAR1A/EZR	7
celltypes.CD4 T cell.down	celltypes	CD4 T cell	down	MF	GO:0031072	heat shock protein binding	30/2083	124/14933	0.241935	1.73443	3.30637	0.00151793	0.0176028	0.0141547	AHSA1/DNAJB14/STUB1/KPNB1/CSNK2A1/APAF1/LMAN2/DNAJA1/ZFP36/HSPA1A/STIP1/HTT/NR3C1/DNAJC10/UNC45A/DNAJB2/DNAJB6/MVD/HDAC8/IRAK1/SLC12A2/GMEB1/BCOR/SPN/TFRC/HIF1A/ERN1/EIF2AK3/LIMK1/ITGAM	30
celltypes.CD4 T cell.down	celltypes	CD4 T cell	down	MF	GO:0001221	transcription coregulator binding	27/2083	108/14933	0.25	1.79225	3.3268	0.00152874	0.0176028	0.0141547	ELOB/ZNF644/UBE2I/EP300/CREBBP/CTNNB1/CDK9/STAT6/PPARA/RORA/USP11/HDAC5/ZBTB7A/LCOR/SMAD3/JUND/MED25/FOXO3/EHMT1/ZBTB49/BCL6/HIF1A/RUNX3/RXRA/ZBTB16/FOS/CTBP2	27
celltypes.CD4 T cell.down	celltypes	CD4 T cell	down	MF	GO:0141110	transporter inhibitor activity	13/2083	39/14933	0.333333	2.38966	3.49855	0.00171545	0.0190143	0.0152897	CALM2/VTI1B/LAMP1/ENSA/VAMP8/STX8/CAMK2D/SLC30A1/BCL2/NEDD4L/ITPR1/STX7/STOM	13
celltypes.CD4 T cell.down	celltypes	CD4 T cell	down	MF	GO:0070840	dynein complex binding	9/2083	22/14933	0.409091	2.93277	3.65249	0.00175402	0.0192617	0.0154887	SMC3/APC/PAFAH1B1/FMR1/RAB29/FBXW11/BICD2/GPSM2/BICD1	9
celltypes.CD4 T cell.down	celltypes	CD4 T cell	down	MF	GO:0043130	ubiquitin binding	25/2083	100/14933	0.25	1.79225	3.20035	0.00224008	0.0241522	0.0194212	FBXW7/AUP1/VPS36/RBCK1/UBXN7/UBE2L6/MDM2/DDI2/FBXO7/ILRUN/TSG101/STAM2/DNAJB2/SMAD3/SIRT2/RAD23B/SQSTM1/AMFR/UBE2A/JARID2/RNF19B/TNFAIP3/UEVLD/CXCR4/GGA2	25
celltypes.CD4 T cell.down	celltypes	CD4 T cell	down	MF	GO:0140030	modification-dependent protein binding	37/2083	167/14933	0.221557	1.58834	3.07827	0.00253434	0.0268369	0.02158	BRD4/VCP/OPTN/EP300/ZZEF1/ZBTB1/PWP1/ATAD2B/ATRX/CBX6/DPF2/BAZ2A/FMR1/L3MBTL3/ZMYND11/ABRAXAS2/NBN/KMT2E/BRD2/ZFAND6/DNAJB2/RNF169/KDM4A/MINDY2/RAD23B/SQSTM1/PSME4/BPTF/OTUD7B/LRWD1/AGAP3/CDYL/EPS15/TNFAIP3/CGAS/PLCG2/LYN	37
celltypes.CD4 T cell.down	celltypes	CD4 T cell	down	MF	GO:0019208	phosphatase regulator activity	26/2083	107/14933	0.242991	1.742	3.10123	0.0028345	0.0297498	0.0239223	CALM2/ANP32E/PPP2R5E/PPP3R1/PPP6R1/PPP4R3A/ENSA/PPP1R15A/SHOC2/PHACTR4/MGAT5/PPP2R5C/PPP1R12A/LGALS3/EIF2AK2/ARPP19/PPP2R5A/PPP1R14B/PPP4R1/BMP2K/PPP1R9B/PPP1R16B/GNA12/ITGA1/ZEB2/PHACTR1	26
celltypes.CD4 T cell.down	celltypes	CD4 T cell	down	MF	GO:0003925	G protein activity	15/2083	51/14933	0.294118	2.10853	3.19266	0.00318184	0.0328144	0.0263867	SAR1A/RAC1/RAP1B/RAP2B/RHOA/RAB5C/RAB4B/RAB1B/ARF6/GNA13/RAP2C/RAP2A/RALB/GNA12/RAB27A	15
celltypes.CD4 T cell.down	celltypes	CD4 T cell	down	MF	GO:0061980	regulatory RNA binding	15/2083	51/14933	0.294118	2.10853	3.19266	0.00318184	0.0328144	0.0263867	HNRNPU/NEAT1/XIST/HNRNPA2B1/MECP2/ELAVL1/RC3H1/DICER1/FMR1/QKI/MBD2/ARB2A/TUT7/ZC3H12A/AGO4	15
celltypes.CD4 T cell.down	celltypes	CD4 T cell	down	MF	GO:0044769	ATPase activity, coupled to transmembrane movement of ions, rotational mechanism	9/2083	24/14933	0.375	2.68837	3.33274	0.0035511	0.0350967	0.0282219	ATP6V0E1/ATP5F1B/ATP6V1E1/ATP6V1D/ATP6V0C/ATP6V0B/ATP6V0D1/TCIRG1/ATP6V1A	9
celltypes.CD4 T cell.down	celltypes	CD4 T cell	down	MF	GO:0046961	proton-transporting ATPase activity, rotational mechanism	9/2083	24/14933	0.375	2.68837	3.33274	0.0035511	0.0350967	0.0282219	ATP6V0E1/ATP5F1B/ATP6V1E1/ATP6V1D/ATP6V0C/ATP6V0B/ATP6V0D1/TCIRG1/ATP6V1A	9
celltypes.CD4 T cell.down	celltypes	CD4 T cell	down	MF	GO:0140994	RNA polymerase II CTD heptapeptide repeat modifying activity	26/2083	109/14933	0.238532	1.71003	2.99545	0.00371251	0.0361056	0.0290331	CTDNEP1/UBLCP1/BRD4/PPP2CA/FKBP2/CDK12/PPP1CC/PPTC7/CDK9/SSH2/PPM1K/PPM1A/CDK13/PPM1D/PPP1CA/DUSP1/CTDSP1/DUSP22/SSH1/MAPK1/PPP3CA/PPM1L/DUSP2/DUSP10/DUSP5/DUSP4	26
celltypes.CD4 T cell.down	celltypes	CD4 T cell	down	MF	GO:0031490	chromatin DNA binding	26/2083	110/14933	0.236364	1.69449	2.94337	0.00423103	0.040144	0.0322805	HNRNPU/HMGN2/KDM6A/MECP2/EP300/SMARCD2/H3-3A/CREBBP/ATRX/KDM5A/HMGN3/SMARCE1/H3-3B/MBD2/H1-4/HMGN4/JMJD1C/SMAD3/REPIN1/FOXO3/H1-2/BCL6/SMARCB1/TOX/ACTN4/EOMES	26
celltypes.CD4 T cell.down	celltypes	CD4 T cell	down	MF	GO:0141108	transporter regulator activity	31/2083	139/14933	0.223022	1.59884	2.85579	0.00487419	0.0458793	0.0368924	CALM2/VTI1B/MICU2/LAMP1/DLG1/ATP6AP1/ENSA/PDE4D/AKT1/VAMP8/AKAP9/SCLT1/STX8/CAMK2D/STIM2/SLC30A1/ARPP19/BCL2/NEDD4L/CHP1/NHERF1/ITPR1/ATP2B4/PRKCB/YWHAH/PDE4B/FLNA/STX7/STOM/ADRB2/TSPAN13	31
celltypes.CD4 T cell.down	celltypes	CD4 T cell	down	MF	GO:0140852	histone ubiquitin ligase activity	6/2083	13/14933	0.461538	3.30876	3.35289	0.0052065	0.0486214	0.0390973	HUWE1/PCGF5/PCGF3/UBR2/BARD1/DTX3L	6
celltypes.CD4 T cell.down	celltypes	CD4 T cell	down	MF	GO:0031491	nucleosome binding	18/2083	69/14933	0.26087	1.87017	2.91684	0.00544634	0.049308	0.0396495	HMGN2/SUPT16H/SMARCD2/H3-3A/HMGN3/SMARCE1/H3-3B/MBD2/ARID1B/H1-4/HMGN4/PARP1/RNF169/PWWP3A/H1-2/HIRA/SMARCB1/CGAS	18
celltypes.CD4 T cell.down	celltypes	CD4 T cell	down	MF	GO:0003950	NAD+ poly-ADP-ribosyltransferase activity	8/2083	22/14933	0.363636	2.6069	3.03669	0.00732023	0.0609574	0.049017	TNKS2/PARP9/PARP1/PARP4/SIRT2/PARP8/PARP15/PARP14	8
celltypes.CD4 T cell.down	celltypes	CD4 T cell	down	MF	GO:0003756	protein disulfide isomerase activity	7/2083	18/14933	0.388889	2.78794	3.05583	0.00791521	0.0609574	0.049017	P4HB/PDIA6/TMX1/ERP44/TXNDC5/QSOX1/QSOX2	7
celltypes.CD4 T cell.down	celltypes	CD4 T cell	down	MF	GO:0032931	histone H3K56 acetyltransferase activity	7/2083	18/14933	0.388889	2.78794	3.05583	0.00791521	0.0609574	0.049017	EP300/KAT6B/CREBBP/KAT5/NCOA3/NCOA1/KAT2B	7
celltypes.CD4 T cell.down	celltypes	CD4 T cell	down	MF	GO:0043999	histone H2AK5 acetyltransferase activity	7/2083	18/14933	0.388889	2.78794	3.05583	0.00791521	0.0609574	0.049017	EP300/KAT6B/CREBBP/KAT5/NCOA3/NCOA1/KAT2B	7
celltypes.CD4 T cell.down	celltypes	CD4 T cell	down	MF	GO:0044014	histone H2BK5 acetyltransferase activity	7/2083	18/14933	0.388889	2.78794	3.05583	0.00791521	0.0609574	0.049017	EP300/KAT6B/CREBBP/KAT5/NCOA3/NCOA1/KAT2B	7
celltypes.CD4 T cell.down	celltypes	CD4 T cell	down	MF	GO:0046972	histone H4K16 acetyltransferase activity	7/2083	18/14933	0.388889	2.78794	3.05583	0.00791521	0.0609574	0.049017	EP300/KAT6B/CREBBP/KAT5/NCOA3/NCOA1/KAT2B	7
celltypes.CD4 T cell.down	celltypes	CD4 T cell	down	MF	GO:0140908	histone H3K122 acetyltransferase activity	7/2083	18/14933	0.388889	2.78794	3.05583	0.00791521	0.0609574	0.049017	EP300/KAT6B/CREBBP/KAT5/NCOA3/NCOA1/KAT2B	7
celltypes.CD4 T cell.down	celltypes	CD4 T cell	down	MF	GO:0050700	CARD domain binding	6/2083	14/14933	0.428571	3.07242	3.12338	0.00804737	0.0615754	0.0495139	MAVS/CASP4/CARD11/CARD16/CASP1/RIPK2	6
celltypes.CD4 T cell.down	celltypes	CD4 T cell	down	MF	GO:0042169	SH2 domain binding	12/2083	41/14933	0.292683	2.09824	2.83508	0.00829339	0.063051	0.0507005	RUFY1/SLAMF1/SQSTM1/ABL1/JAK2/INPPL1/LAX1/KIT/LAT2/BLNK/LILRB1/SYK	12
celltypes.CD4 T cell.down	celltypes	CD4 T cell	down	MF	GO:0061134	peptidase regulator activity	33/2083	159/14933	0.207547	1.4879	2.4902	0.0115266	0.0826801	0.0664845	PARK7/XIAP/VCP/GAPDH/SERPINB1/SERPINB9/APAF1/SERPINB6/PSMD14/BIRC6/PSME1/ADRM1/PRNP/PSME3/PTTG1/PSME4/TANK/CARD16/TGFB1/CAST/CASP1/CTSC/APLP2/ATP2A3/FURIN/ANXA2/BST2/GBP5/ABCA2/SERPINI1/CRIM1/CTSH/CST7	33
celltypes.CD4 T cell.down	celltypes	CD4 T cell	down	MF	GO:0004126	cytidine deaminase activity	5/2083	11/14933	0.454545	3.25863	3.01703	0.0116824	0.0826801	0.0664845	APOBEC3D/APOBEC3F/APOBEC3C/APOBEC3G/APOBEC3H	5
celltypes.CD4 T cell.down	celltypes	CD4 T cell	down	MF	GO:0042608	T cell receptor binding	5/2083	11/14933	0.454545	3.25863	3.01703	0.0116824	0.0826801	0.0664845	HLA-A/DOCK2/MR1/HLA-DRA/HLA-DRB1	5
celltypes.CD4 T cell.down	celltypes	CD4 T cell	down	MF	GO:0005521	lamin binding	6/2083	15/14933	0.4	2.86759	2.91357	0.0118513	0.0826801	0.0664845	LBR/SUN2/PPP1CC/PRNP/SYNE1/PLCB1	6
celltypes.CD4 T cell.down	celltypes	CD4 T cell	down	MF	GO:0031690	adrenergic receptor binding	6/2083	15/14933	0.4	2.86759	2.91357	0.0118513	0.0826801	0.0664845	GRK2/PDE4D/ARRDC3/RAPGEF2/NHERF1/AKAP5	6
celltypes.CD4 T cell.down	celltypes	CD4 T cell	down	MF	GO:0043028	cysteine-type endopeptidase regulator activity involved in apoptotic process	10/2083	34/14933	0.294118	2.10853	2.60531	0.0148306	0.0966407	0.0777106	XIAP/SERPINB9/APAF1/BIRC3/PRDX5/RPS6KA1/CASP1/ATP2A3/TNFSF14/CTSH	10
celltypes.CD4 T cell.down	celltypes	CD4 T cell	down	MF	GO:0035254	glutamate receptor binding	12/2083	44/14933	0.272727	1.95518	2.55464	0.014891	0.0966407	0.0777106	MT-ND2/DLG1/GRIPAP1/NSF/PRNP/SQSTM1/NHERF1/PTPN4/PTK2B/DLG3/HIP1/AKAP5	12
celltypes.CD4 T cell.down	celltypes	CD4 T cell	down	MF	GO:0016493	C-C chemokine receptor activity	7/2083	20/14933	0.35	2.50915	2.71904	0.0149889	0.0966407	0.0777106	CCR6/CXCR4/CXCR3/CXCR5/CXCR6/CCR5/CX3CR1	7
celltypes.CD4 T cell.down	celltypes	CD4 T cell	down	MF	GO:0030552	cAMP binding	7/2083	20/14933	0.35	2.50915	2.71904	0.0149889	0.0966407	0.0777106	PDE4D/PRKAR2A/PRKAR2B/RAPGEF2/PRKAR1A/PDE4B/PDE4A	7
celltypes.CD4 T cell.down	celltypes	CD4 T cell	down	MF	GO:0097110	scaffold protein binding	16/2083	65/14933	0.246154	1.76467	2.48747	0.0149932	0.0966407	0.0777106	PARK7/ATG4B/HSP90AA1/PDE4D/MAP2K1/GSK3B/ITPR2/BRAF/MAP2K2/PSAP/ATP2B4/PLCG2/AKAP5/LYN/DSP/SYK	16
celltypes.CD4 T cell.down	celltypes	CD4 T cell	down	MF	GO:0042826	histone deacetylase binding	24/2083	110/14933	0.218182	1.56414	2.39094	0.0158952	0.101901	0.0819405	CIR1/NIPBL/MECP2/HSP90AA1/RAD9A/HSPA1A/H1-4/HDAC5/NCOR1/PARP1/TRAF6/LCOR/SIRT2/SUDS3/SP2/WDTC1/KAT2B/BCOR/KPNA2/HIF1A/MEF2D/IKZF3/BCL3/MEF2C	24
celltypes.CD4 T cell.down	celltypes	CD4 T cell	down	MF	GO:0004869	cysteine-type endopeptidase inhibitor activity	6/2083	16/14933	0.375	2.68837	2.72044	0.0167627	0.105188	0.0845838	XIAP/BIRC6/PTTG1/CARD16/CAST/CST7	6
celltypes.CD4 T cell.down	celltypes	CD4 T cell	down	MF	GO:0005068	transmembrane receptor protein tyrosine kinase adaptor activity	6/2083	16/14933	0.375	2.68837	2.72044	0.0167627	0.105188	0.0845838	PIK3R1/GRB2/SH2B3/DOK2/STAP1/BLNK	6
celltypes.CD4 T cell.down	celltypes	CD4 T cell	down	MF	GO:0140807	NAD+-protein-glutamate ADP-ribosyltransferase activity	5/2083	12/14933	0.416667	2.98708	2.77242	0.0177587	0.107458	0.0864093	TNKS2/PARP1/PARP4/PARP15/PARP14	5
celltypes.CD4 T cell.down	celltypes	CD4 T cell	down	MF	GO:0140822	NAD+-histone H2BE35 glutamate ADP-ribosyltransferase activity	5/2083	12/14933	0.416667	2.98708	2.77242	0.0177587	0.107458	0.0864093	TNKS2/PARP1/PARP4/PARP15/PARP14	5
celltypes.CD4 T cell.down	celltypes	CD4 T cell	down	MF	GO:0140844	NAD+-histone H2BE2 glutamate ADP-ribosyltransferase activity	5/2083	12/14933	0.416667	2.98708	2.77242	0.0177587	0.107458	0.0864093	TNKS2/PARP1/PARP4/PARP15/PARP14	5
celltypes.CD4 T cell.down	celltypes	CD4 T cell	down	MF	GO:0140867	NAD+-histone H2BE18 glutamate ADP-ribosyltransferase activity	5/2083	12/14933	0.416667	2.98708	2.77242	0.0177587	0.107458	0.0864093	TNKS2/PARP1/PARP4/PARP15/PARP14	5
celltypes.CD4 T cell.down	celltypes	CD4 T cell	down	MF	GO:0005154	epidermal growth factor receptor binding	9/2083	30/14933	0.3	2.1507	2.54002	0.0178722	0.107596	0.08652	SOS1/GRB2/SOCS5/SLA/SNX2/PLSCR1/HIP1/VAV3/MS4A1	9
celltypes.CD4 T cell.down	celltypes	CD4 T cell	down	MF	GO:0051219	phosphoprotein binding	20/2083	89/14933	0.224719	1.61101	2.32766	0.0193064	0.115644	0.0929911	FBXW7/THRAP3/PAFAH1B1/CRKL/PIK3R1/GRB2/SAMSN1/IGF2R/YWHAZ/CBLB/ABL1/SLA/RB1/SH3BP2/MAPK1/TBK1/STAP1/PLCG2/LYN/SYK	20
celltypes.CD4 T cell.down	celltypes	CD4 T cell	down	MF	GO:0043274	phospholipase binding	7/2083	21/14933	0.333333	2.38966	2.56568	0.0198352	0.115884	0.0931848	PAFAH1B1/PDPK1/WAS/BLNK/BTK/SYK/BANK1	7
celltypes.CD4 T cell.down	celltypes	CD4 T cell	down	MF	GO:0051010	microtubule plus-end binding	7/2083	21/14933	0.333333	2.38966	2.56568	0.0198352	0.115884	0.0931848	APC/PAFAH1B1/CLIP1/TBCB/FBXW11/MAPRE2/CLASP1	7
celltypes.CD4 T cell.down	celltypes	CD4 T cell	down	MF	GO:0140312	cargo adaptor activity	7/2083	21/14933	0.333333	2.38966	2.56568	0.0198352	0.115884	0.0931848	AP2M1/AP2B1/AP1G1/GOLPH3/HIP1R/HIP1/AP1S3	7
celltypes.CD4 T cell.down	celltypes	CD4 T cell	down	MF	GO:0140693	molecular condensate scaffold activity	12/2083	46/14933	0.26087	1.87017	2.37975	0.0211095	0.120946	0.0972551	NEAT1/HNRNPA2B1/MAVS/ALKBH5/MECP2/FMR1/SOS1/PRNP/LGALS3/SQSTM1/CGAS/BLNK	12
celltypes.CD4 T cell.down	celltypes	CD4 T cell	down	MF	GO:0048487	beta-tubulin binding	11/2083	41/14933	0.268293	1.92339	2.3837	0.0217808	0.124193	0.0998655	SMC3/GABARAP/EMD/HTT/APPL1/ARL8A/TBCD/SYT11/B4GALT1/GABARAPL1/RGS2	11
celltypes.CD4 T cell.down	celltypes	CD4 T cell	down	MF	GO:0050811	GABA receptor binding	6/2083	17/14933	0.352941	2.53023	2.5416	0.0229119	0.128177	0.10307	GABARAP/PPP2CA/CLPTM1/GABARAPL1/TRAK1/AKAP5	6
celltypes.CD4 T cell.down	celltypes	CD4 T cell	down	MF	GO:0070628	proteasome binding	6/2083	17/14933	0.352941	2.53023	2.5416	0.0229119	0.128177	0.10307	PSMD14/ECPAS/ADRM1/DNAJB2/RAD23B/PSME4	6
celltypes.CD4 T cell.down	celltypes	CD4 T cell	down	MF	GO:1990380	K48-linked deubiquitinase activity	6/2083	17/14933	0.352941	2.53023	2.5416	0.0229119	0.128177	0.10307	USP7/USP9X/DESI2/MINDY2/USP8/OTUD7B	6
celltypes.CD4 T cell.down	celltypes	CD4 T cell	down	MF	GO:0140793	histone H2AXY142 phosphatase activity	19/2083	85/14933	0.223529	1.60248	2.24269	0.0233946	0.129985	0.104523	PTPRA/PTP4A2/PTP4A1/SSH2/PTPN1/DUSP1/PTPN7/DUSP22/PTPN18/PTPRJ/SSH1/PTPN4/PTPRE/PTPN12/DUSP2/PTPN22/DUSP10/DUSP5/DUSP4	19
celltypes.CD4 T cell.down	celltypes	CD4 T cell	down	MF	GO:1990782	protein tyrosine kinase binding	23/2083	108/14933	0.212963	1.52673	2.21184	0.0235513	0.129985	0.104523	DAZAP2/CSK/HSP90AA1/CRKL/PIK3R1/PTPN1/GRB2/SOCS5/CPNE3/RNF41/RAB8A/SQSTM1/CBLB/DUSP22/NEDD9/SH2B3/EPHA4/ITGB1/DOK2/STAP1/PLCG2/BLNK/BANK1	23
celltypes.CD4 T cell.down	celltypes	CD4 T cell	down	MF	GO:0016667	oxidoreductase activity, acting on a sulfur group of donors	13/2083	52/14933	0.25	1.79225	2.30408	0.0236735	0.129985	0.104523	P4HB/PDIA6/GSR/TMX1/DNAJC10/SUMF1/SELENOT/TXNDC5/QSOX1/SESN2/TMX4/QSOX2/IFI30	13
celltypes.CD4 T cell.down	celltypes	CD4 T cell	down	MF	GO:0140463	chromatin-protein adaptor activity	13/2083	52/14933	0.25	1.79225	2.30408	0.0236735	0.129985	0.104523	LBR/NEAT1/XIST/BRD4/TAF7/MECP2/ZZEF1/DPF2/MDC1/NBN/RNF169/BARD1/JARID2	13
celltypes.CD4 T cell.down	celltypes	CD4 T cell	down	MF	GO:1990404	NAD+-protein mono-ADP-ribosyltransferase activity	7/2083	22/14933	0.318182	2.28104	2.42088	0.0256755	0.136405	0.109686	TNKS2/PARP9/PARP1/PARP4/PARP8/PARP15/PARP14	7
celltypes.CD4 T cell.down	celltypes	CD4 T cell	down	MF	GO:0019905	syntaxin binding	14/2083	58/14933	0.241379	1.73045	2.24401	0.0258779	0.136405	0.109686	BLOC1S6/GOLGA2/TMED9/TMED10/VAMP8/STXBP2/STX8/NSF/NAPB/VPS18/SNAP23/ABL1/BAIAP3/STX7	14
celltypes.CD4 T cell.down	celltypes	CD4 T cell	down	MF	GO:0051018	protein kinase A binding	12/2083	48/14933	0.25	1.79225	2.21339	0.0290683	0.148599	0.119491	CSK/PRKAR2A/PJA2/GSK3B/AKAP9/AKAP13/PRKAR2B/ACBD3/RDX/PRKAR1A/EZR/AKAP5	12
celltypes.CD4 T cell.down	celltypes	CD4 T cell	down	MF	GO:0016004	phospholipase activator activity	6/2083	18/14933	0.333333	2.38966	2.37512	0.0304103	0.152825	0.122889	PDPK1/ARL1/CASP3/GM2A/CCL5/BTK	6
celltypes.CD4 T cell.down	celltypes	CD4 T cell	down	MF	GO:0035615	clathrin adaptor activity	6/2083	18/14933	0.333333	2.38966	2.37512	0.0304103	0.152825	0.122889	AP2M1/AP2B1/AP1G1/HIP1R/HIP1/AP1S3	6
celltypes.CD4 T cell.down	celltypes	CD4 T cell	down	MF	GO:0030276	clathrin binding	11/2083	43/14933	0.255814	1.83393	2.20479	0.0305559	0.152908	0.122956	CLTC/CLINT1/AP2B1/SCLT1/GAK/LMBRD1/AFTPH/HIP1R/PICALM/AP1B1/HIP1	11
celltypes.CD4 T cell.down	celltypes	CD4 T cell	down	MF	GO:0002039	p53 binding	15/2083	65/14933	0.230769	1.65438	2.1287	0.0315842	0.156975	0.126227	DAZAP2/USP7/BRD4/EP300/CREBBP/GSK3B/MDM2/HTT/PSME3/EHMT1/BLM/HIF1A/AXIN1/TEP1/SMARCB1	15
celltypes.CD4 T cell.down	celltypes	CD4 T cell	down	MF	GO:0035925	mRNA 3'-UTR AU-rich region binding	8/2083	28/14933	0.285714	2.04828	2.23534	0.0331778	0.161266	0.129677	HNRNPA0/ZFP36L2/ELAVL1/ZFP36/MEX3D/EXOSC4/ZC3H12A/ZFP36L1	8
celltypes.CD4 T cell.down	celltypes	CD4 T cell	down	MF	GO:0051019	mitogen-activated protein kinase binding	8/2083	28/14933	0.285714	2.04828	2.23534	0.0331778	0.161266	0.129677	PPM1D/TNIP1/DUSP1/ABL1/MAPKAPK2/PTPRJ/DUSP2/DUSP10	8
celltypes.CD4 T cell.down	celltypes	CD4 T cell	down	MF	GO:0050780	dopamine receptor binding	5/2083	14/14933	0.357143	2.56035	2.35163	0.0353575	0.169089	0.135967	SNX5/GNA13/NHERF1/PPP1R9B/GNA12	5
celltypes.CD4 T cell.down	celltypes	CD4 T cell	down	MF	GO:0120283	protein serine/threonine kinase binding	5/2083	14/14933	0.357143	2.56035	2.35163	0.0353575	0.169089	0.135967	DAZAP2/XIAP/DNAJB2/AXIN1/CDKN1A	5
celltypes.CD4 T cell.down	celltypes	CD4 T cell	down	MF	GO:0030145	manganese ion binding	15/2083	66/14933	0.227273	1.62932	2.06291	0.0357852	0.170447	0.137059	MGAT1/PAPOLA/NUDT3/IDI1/MGAT2/PPM1K/PPM1A/MGAT5/GALNT1/XPNPEP1/NUDT16/ABL1/GYG1/GALNT2/B4GALT1	15
celltypes.CD4 T cell.down	celltypes	CD4 T cell	down	MF	GO:0042393	histone binding	42/2083	230/14933	0.182609	1.30912	1.90213	0.0389802	0.1792	0.144098	ANP32A/PTMA/ANP32E/TBL1XR1/BRD4/SPTY2D1/NASP/BAZ1B/RESF1/ZZEF1/DEK/PARP9/PWP1/ATAD2B/ATRX/CBX6/KDM5A/DPF2/BAZ2A/FMR1/L3MBTL3/TSPYL1/INO80/ZMYND11/RBBP7/UHRF2/NBN/KMT2E/BRD2/KDM4A/COPRS/WDTC1/PSME4/BPTF/HIRA/DTX3L/JAK2/MCM2/LRWD1/CDYL/PRKCB/PTMS	42
celltypes.CD4 T cell.down	celltypes	CD4 T cell	down	MF	GO:0140566	histone reader activity	9/2083	34/14933	0.264706	1.89767	2.10975	0.0392764	0.1792	0.144098	BRD4/TAF7/MECP2/ZZEF1/DPF2/MDC1/RNF169/BARD1/JARID2	9
celltypes.CD4 T cell.down	celltypes	CD4 T cell	down	MF	GO:0005123	death receptor binding	6/2083	19/14933	0.315789	2.26389	2.21943	0.0393468	0.1792	0.144098	RIPK1/MADD/CASP3/MYD88/CFLAR/FASLG	6
celltypes.CD4 T cell.down	celltypes	CD4 T cell	down	MF	GO:0008373	sialyltransferase activity	6/2083	19/14933	0.315789	2.26389	2.21943	0.0393468	0.1792	0.144098	ST3GAL2/ST6GAL1/ST3GAL5/ST8SIA4/ST6GALNAC6/ST8SIA6	6
celltypes.CD4 T cell.down	celltypes	CD4 T cell	down	MF	GO:0019865	immunoglobulin binding	6/2083	19/14933	0.315789	2.26389	2.21943	0.0393468	0.1792	0.144098	LGALS3/FCER1G/CD22/JCHAIN/FCGR3A/MS4A1	6
celltypes.CD4 T cell.down	celltypes	CD4 T cell	down	MF	GO:0005522	profilin binding	4/2083	10/14933	0.4	2.86759	2.37852	0.039436	0.1792	0.144098	HTT/WIPF1/VASP/RHOQ	4
celltypes.CD4 T cell.down	celltypes	CD4 T cell	down	MF	GO:0141052	histone H3 demethylase activity	7/2083	24/14933	0.291667	2.09095	2.15348	0.0406378	0.182436	0.1467	KDM6A/KDM5A/JMJD1C/JMJD6/KDM4A/KDM2B/KDM4B	7
celltypes.CD4 T cell.down	celltypes	CD4 T cell	down	MF	GO:0008013	beta-catenin binding	20/2083	96/14933	0.208333	1.49354	1.95315	0.0407634	0.182436	0.1467	TBL1XR1/APC/EP300/CALCOCO1/GSK3B/NUMB/RORA/SMAD3/FOXO3/FOXO4/DVL3/TAX1BP3/AXIN1/NHERF1/PTPRJ/VCL/NR4A2/SMAD7/CTNNA1/TCF4	20
celltypes.CD4 T cell.down	celltypes	CD4 T cell	down	MF	GO:0043495	protein-membrane adaptor activity	11/2083	45/14933	0.244444	1.75242	2.03517	0.0415945	0.184071	0.148015	SUN2/RB1CC1/CIB1/RRAGC/TRABD/CD53/MYH9/ATG2A/SYNE2/NHERF1/SYNE1	11
celltypes.CD4 T cell.down	celltypes	CD4 T cell	down	MF	GO:0140938	histone H3 methyltransferase activity	11/2083	45/14933	0.244444	1.75242	2.03517	0.0415945	0.184071	0.148015	ASH1L/NSD1/KMT2D/NSD2/KMT2C/SETD2/EHMT1/JARID2/PRDM2/PRDM8/SETBP1	11
celltypes.CD4 T cell.down	celltypes	CD4 T cell	down	MF	GO:0015923	mannosidase activity	5/2083	15/14933	0.333333	2.38966	2.16796	0.0471106	0.203917	0.163973	MAN2A2/MAN1A2/EDEM2/MANBA/MAN1A1	5
celltypes.CD4 T cell.down	celltypes	CD4 T cell	down	MF	GO:0031624	ubiquitin conjugating enzyme binding	8/2083	30/14933	0.266667	1.91173	2.01253	0.0485869	0.209529	0.168486	AUP1/ARIH1/ARIH2/PPARA/TRAF6/SIAH2/RNF19A/RNF19B	8
celltypes.CD4 T cell.down	celltypes	CD4 T cell	down	MF	GO:0043539	protein serine/threonine kinase activator activity	15/2083	69/14933	0.217391	1.55848	1.87203	0.0507869	0.214353	0.172365	STK4/CALM2/DAZAP2/MAP2K1/NBN/MAP2K2/TAOK2/ACSL1/MOB1A/TGFB1/MNAT1/PARP8/IQGAP1/SAV1/TCL1A	15
celltypes.CD4 T cell.down	celltypes	CD4 T cell	down	MF	GO:0008179	adenylate cyclase binding	4/2083	11/14933	0.363636	2.6069	2.14647	0.0552952	0.226921	0.182471	CALM2/CAP1/ADRB2/AKAP5	4
celltypes.CD4 T cell.down	celltypes	CD4 T cell	down	MF	GO:0008432	JUN kinase binding	4/2083	11/14933	0.363636	2.6069	2.14647	0.0552952	0.226921	0.182471	RNF13/MAD2L2/GSTP1/DUSP10	4
celltypes.CD4 T cell.down	celltypes	CD4 T cell	down	MF	GO:0140537	transcription regulator activator activity	4/2083	11/14933	0.363636	2.6069	2.14647	0.0552952	0.226921	0.182471	PARP1/JMJD6/HIF1A/SAV1	4
celltypes.CD4 T cell.down	celltypes	CD4 T cell	down	MF	GO:0051287	NAD binding	12/2083	53/14933	0.226415	1.62317	1.82975	0.0579846	0.236322	0.190031	GAPDH/PARP1/SIRT7/SIRT2/GRHPR/CYB5R3/UGDH/IDH2/PARP15/PARP14/ALDH2/CTBP2	12
celltypes.CD4 T cell.down	celltypes	CD4 T cell	down	MF	GO:0032452	histone demethylase activity	7/2083	26/14933	0.269231	1.93011	1.91108	0.0603399	0.241767	0.194409	KDM6A/KDM5A/JMJD1C/JMJD6/KDM4A/KDM2B/KDM4B	7
celltypes.CD4 T cell.down	celltypes	CD4 T cell	down	MF	GO:0000062	fatty-acyl-CoA binding	5/2083	16/14933	0.3125	2.24031	1.99849	0.0609051	0.242394	0.194913	DBI/SCP2/ACADVL/ACBD3/ACBD5	5
celltypes.CD4 T cell.down	celltypes	CD4 T cell	down	MF	GO:0008198	ferrous iron binding	6/2083	21/14933	0.285714	2.04828	1.93541	0.0617663	0.244183	0.196352	HIF1AN/FTH1/EGLN1/FECH/TET2/ACP5	6
celltypes.CD4 T cell.down	celltypes	CD4 T cell	down	MF	GO:0140313	molecular sequestering activity	11/2083	48/14933	0.229167	1.64289	1.79613	0.0628575	0.246851	0.198497	FTH1/LAPTM5/USP9X/RBCK1/YWHAZ/SQSTM1/CD69/PMEPA1/SESN2/XAF1/CDKN1A	11
celltypes.CD4 T cell.up	celltypes	CD4 T cell	up	BP	GO:0002181	cytoplasmic translation	94/889	164/14457	0.573171	9.32096	27.4316	5.65676e-71	2.64227e-67	2.53601e-67	EIF3E/RPL39/RPS3A/RPL32/RPL35A/RPL22/RPL10A/RPL9/EIF2D/RPL38/RPL4/RPL34/RPS8/RPS2/RPS13/PABPC1/RPS21/RPL13/RPL31/RPL36/RPL12/RPL11/RPL27/RPL24/EIF3H/RPL30/RPL3/RPS25/RPS5/RPL19/RPS28/RPL10/RPL14/RPS15A/RPSA/RPS24/RPL29/RPS9/RPL36A/RPL21/RPL7/RPS14/RPS27A/RPS4X/RPS12/RPL37/RPS29/RPS3/RPS6/RPS18/RPS10/RACK1/RPL5/RPS15/RPL41/RPL13A/EIF3M/RPLP2/RPLP0/RPL27A/RPL17/RPS26/RPS20/RPL18/EIF3K/RPS27/RPL28/R…	94
celltypes.CD4 T cell.up	celltypes	CD4 T cell	up	BP	GO:0022613	ribonucleoprotein complex biogenesis	91/889	459/14457	0.198257	3.22407	12.3948	4.30495e-24	1.00542e-20	9.64988e-21	MTERF4/EIF3E/GEMIN4/RPS3A/EIF2A/NPM1/RPL35A/EIF2D/RPL38/NPM3/RPS8/RPS13/MYBBP1A/RPS21/RRS1/RPL11/RPL27/RPL24/C1QBP/EIF3H/RPS25/RPS5/RPS28/RPL14/RPS15A/RPSA/RPS24/GTF2H5/NSA2/RPS9/NOPCHAP1/RPL7/RPS14/DIMT1/URB1/RPS27A/RPS4X/RPS12/FASTKD2/RPS6/NOL9/GTF3A/RIOX2/RPL5/RPS15/WDR75/RPL13A/EIF3M/WDR43/SBDS/FBL/RPLP0/NOP53/CLNS1A/ATM/EIF3K/RPS27/PSIP1/RPS16/RPS23/RPL35/NHP2/NOB1/RPL26/RPS17/WDR3/SNRPE/RPL…	91
celltypes.CD4 T cell.up	celltypes	CD4 T cell	up	BP	GO:0016072	rRNA metabolic process	51/889	260/14457	0.196154	3.18987	9.12062	9.28736e-14	8.67625e-11	8.32734e-11	MYC/MACROH2A2/MTERF4/GEMIN4/RPL35A/NPM3/RPS8/RPS21/RRS1/RPL11/RPL27/RPS25/RPS28/RPL14/RPS24/GTF2H5/NSA2/RPL7/RPS14/DIMT1/URB1/RPS6/NOL9/GTF3A/RPL5/RPS15/WDR75/WDR43/SBDS/FBL/NOP53/POLR1E/RPS27/RPS16/RPL35/NHP2/NOB1/RPL26/RPS17/WDR3/NIFK/RPL7A/MRTO4/RRP1B/RPS7/XRN2/NOP56/DDX21/NOP58/RPS19/POLR1D	51
celltypes.CD4 T cell.up	celltypes	CD4 T cell	up	BP	GO:0006364	rRNA processing	45/889	217/14457	0.207373	3.37232	9.01293	3.50784e-13	2.73085e-10	2.62103e-10	MTERF4/GEMIN4/RPL35A/NPM3/RPS8/RPS21/RRS1/RPL11/RPL27/RPS25/RPS28/RPL14/RPS24/GTF2H5/NSA2/RPL7/RPS14/DIMT1/URB1/RPS6/NOL9/RPL5/RPS15/WDR75/WDR43/SBDS/FBL/NOP53/RPS27/RPS16/RPL35/NHP2/NOB1/RPL26/RPS17/WDR3/RPL7A/MRTO4/RRP1B/RPS7/XRN2/NOP56/DDX21/NOP58/RPS19	45
celltypes.CD4 T cell.up	celltypes	CD4 T cell	up	BP	GO:0042255	ribosome assembly	21/889	55/14457	0.381818	6.20916	9.90729	3.32362e-12	2.2178e-09	2.12861e-09	MTERF4/EIF2A/NPM1/RPL38/RRS1/RPL11/RPL24/C1QBP/RPS5/RPS28/RPSA/RPS14/FASTKD2/RPL5/RPS15/SBDS/NOP53/RPS27/MRTO4/FAU/RPS19	21
celltypes.CD4 T cell.up	celltypes	CD4 T cell	up	BP	GO:0022618	protein-RNA complex assembly	40/889	199/14457	0.201005	3.26876	8.24904	2.04402e-11	1.13926e-08	1.09344e-08	EIF3E/GEMIN4/EIF2D/RPL38/RRS1/RPL11/RPL24/EIF3H/RPS5/RPS28/RPSA/NOPCHAP1/RPS14/FASTKD2/RPL5/RPS15/RPL13A/EIF3M/NOP53/CLNS1A/ATM/EIF3K/RPS27/PSIP1/SNRPE/MRTO4/SRSF6/PRPF19/SRSF5/SNRPD2/EIF2S3/FAU/EIF3F/SNRPF/RPS19/EIF3L/EIF4B/DDX39B/EIF3D/HSP90AB1	40
celltypes.CD4 T cell.up	celltypes	CD4 T cell	up	BP	GO:0071826	protein-RNA complex organization	41/889	208/14457	0.197115	3.20551	8.20097	2.1951e-11	1.13926e-08	1.09344e-08	EIF3E/GEMIN4/EIF2D/RPL38/ZFAND1/RRS1/RPL11/RPL24/EIF3H/RPS5/RPS28/RPSA/NOPCHAP1/RPS14/FASTKD2/RPL5/RPS15/RPL13A/EIF3M/NOP53/CLNS1A/ATM/EIF3K/RPS27/PSIP1/SNRPE/MRTO4/SRSF6/PRPF19/SRSF5/SNRPD2/EIF2S3/FAU/EIF3F/SNRPF/RPS19/EIF3L/EIF4B/DDX39B/EIF3D/HSP90AB1	41
celltypes.CD4 T cell.up	celltypes	CD4 T cell	up	BP	GO:0030098	lymphocyte differentiation	58/889	399/14457	0.145363	2.36391	7.07177	7.07309e-10	3.30384e-07	3.17098e-07	CTSL/CD40LG/CD4/IL6R/ICOS/CAMK4/LEF1/SOCS3/IL6ST/TNFSF13B/TESPA1/CD28/TCF7/THEMIS/MYB/USP44/ITK/CD27/CCR7/JAK3/IL7R/BCL11B/IL23A/ZC3H8/CRTAM/ITM2A/NDFIP1/RPL22/LCK/CD3D/TNFSF8/CD3G/FLT3LG/MFNG/ZEB1/RPS6/SOD1/ITPKB/IKZF1/CYLD/MSH2/PATZ1/NFKBIZ/CD3E/ATM/TGFBR2/PHF10/DOCK10/LMBR1L/RHOH/STAT5B/PIK3CD/PRDX2/FOXP1/ST3GAL1/MALT1/ZAP70/JUNB	58
celltypes.CD4 T cell.up	celltypes	CD4 T cell	up	BP	GO:0050863	regulation of T cell activation	49/889	351/14457	0.139601	2.27021	6.16656	5.65268e-08	1.88598e-05	1.81013e-05	CD40LG/AIF1/CD4/ICOS/CAMK4/LEF1/IL6ST/TNFSF13B/TESPA1/CD28/TMIGD2/DPP4/TCF7/CD5/LAT/CD27/CCR7/JAK3/PAG1/TNFAIP8L2/IL7R/CD6/IL23A/ZC3H8/CRTAM/NDFIP1/LCK/SIT1/NCK2/TNFSF8/RIPOR2/ZEB1/AGER/RPS3/SOD1/ITPKB/CYLD/NFKBIZ/CD3E/PRKCQ/TGFBR2/PHF10/RHOH/STAT5B/PRDX2/HSPD1/MALT1/ZAP70/JUNB	49
celltypes.CD4 T cell.up	celltypes	CD4 T cell	up	BP	GO:0007159	leukocyte cell-cell adhesion	47/889	376/14457	0.125	2.03276	5.19391	2.66e-06	0.000690269	0.00066251	ADTRP/CD40LG/AIF1/CD4/ICOS/LEF1/IL6ST/TNFSF13B/TESPA1/CD28/TMIGD2/DPP4/CD5/CD27/SELL/CCR7/JAK3/PAG1/TNFAIP8L2/IL7R/CD6/IL23A/ZC3H8/CRTAM/NDFIP1/LCK/NCK2/RIPOR2/ETS1/AGER/RPS3/ITPKB/CYLD/SEMA4D/NFKBIZ/CD3E/PRKCQ/TGFBR2/PHF10/SKAP1/RHOH/STAT5B/PRDX2/HSPD1/MALT1/ZAP70/ITGB7	47
celltypes.CD4 T cell.up	celltypes	CD4 T cell	up	BP	GO:1903037	regulation of leukocyte cell-cell adhesion	44/889	344/14457	0.127907	2.08004	5.18949	3.02052e-06	0.000742571	0.000712709	ADTRP/CD40LG/AIF1/CD4/ICOS/LEF1/IL6ST/TNFSF13B/TESPA1/CD28/TMIGD2/DPP4/CD5/CD27/CCR7/JAK3/PAG1/TNFAIP8L2/IL7R/CD6/IL23A/ZC3H8/CRTAM/NDFIP1/LCK/NCK2/RIPOR2/ETS1/AGER/RPS3/ITPKB/CYLD/NFKBIZ/CD3E/PRKCQ/TGFBR2/PHF10/SKAP1/RHOH/STAT5B/PRDX2/HSPD1/MALT1/ZAP70	44
celltypes.CD4 T cell.up	celltypes	CD4 T cell	up	BP	GO:0046631	alpha-beta T cell activation	28/889	184/14457	0.152174	2.47467	5.15302	7.76471e-06	0.00158509	0.00152135	CTSL/IL6R/ICOS/LEF1/SOCS3/IL6ST/CD28/MYB/ITK/JAK3/BCL11B/IL23A/CRTAM/NDFIP1/RPL22/CD3D/TNFSF8/CD3G/AGER/ITPKB/NFKBIZ/CD3E/PRKCQ/TGFBR2/FOXP1/MALT1/ZAP70/JUNB	28
celltypes.CD4 T cell.up	celltypes	CD4 T cell	up	BP	GO:0050870	positive regulation of T cell activation	33/889	236/14457	0.139831	2.27394	5.05075	8.03095e-06	0.00158509	0.00152135	CD40LG/AIF1/CD4/ICOS/LEF1/IL6ST/TNFSF13B/TESPA1/CD28/TMIGD2/DPP4/CD5/CD27/CCR7/IL7R/CD6/IL23A/LCK/NCK2/AGER/RPS3/ITPKB/CYLD/NFKBIZ/CD3E/PRKCQ/TGFBR2/PHF10/RHOH/STAT5B/HSPD1/MALT1/ZAP70	33
celltypes.CD4 T cell.up	celltypes	CD4 T cell	up	BP	GO:0050852	T cell receptor signaling pathway	23/889	138/14457	0.166667	2.71035	5.16755	1.09819e-05	0.00205185	0.00196934	UBASH3A/TESPA1/CD28/TRAT1/THEMIS/FYB1/LAT/ITK/CCR7/LCK/CD3D/PLCG1/CD3G/LIME1/RPS3/TXK/CYLD/NFKBIZ/CD3E/SKAP1/PIK3CD/MALT1/ZAP70	23
celltypes.CD4 T cell.up	celltypes	CD4 T cell	up	BP	GO:1901798	positive regulation of signal transduction by p53 class mediator	9/889	26/14457	0.346154	5.62919	6.04728	1.45643e-05	0.00251963	0.00241831	MYC/RPL11/RPL37/RPS15/ATM/RPS20/RPL23/RPL26/RPS7	9
celltypes.CD4 T cell.up	celltypes	CD4 T cell	up	BP	GO:0072538	T-helper 17 type immune response	12/889	49/14457	0.244898	3.98255	5.35305	3.01508e-05	0.00440108	0.00422409	IL6R/SOCS3/IL6ST/JAK3/IL17RA/IL23A/IL27RA/NFKBIZ/PRKCQ/ARID5A/MALT1/JUNB	12
celltypes.CD4 T cell.up	celltypes	CD4 T cell	up	BP	GO:0002260	lymphocyte homeostasis	15/889	76/14457	0.197368	3.20962	4.94365	5.00974e-05	0.00668585	0.00641699	SLC40A1/TNFSF13B/LAT/JAK3/IL7R/ZC3H8/SIT1/RPS6/PACS1/BBIP1/DOCK10/MIF/STAT5B/PRDX2/CAMLG	15
celltypes.CD4 T cell.up	celltypes	CD4 T cell	up	BP	GO:0006177	GMP biosynthetic process	6/889	13/14457	0.461538	7.50558	6.00663	6.27459e-05	0.00771279	0.00740263	PAICS/ADSL/IMPDH2/PPAT/APRT/ATIC	6
celltypes.CD4 T cell.up	celltypes	CD4 T cell	up	BP	GO:0071887	leukocyte apoptotic process	18/889	108/14457	0.166667	2.71035	4.5667	9.6904e-05	0.011316	0.0108609	CTSL/GIMAP8/CD27/CCR7/JAK3/IL7R/BCL11B/ZC3H8/CD3G/RPS6/ITPKB/NFKBIZ/PRKCQ/LMBR1L/MIF/PIK3CD/FOXP1/ST3GAL1	18
celltypes.CD4 T cell.up	celltypes	CD4 T cell	up	BP	GO:0001819	positive regulation of cytokine production	47/889	437/14457	0.107551	1.74901	4.0698	0.000128829	0.0133724	0.0128346	CD40LG/AIF1/CD4/IL6R/IL6ST/CD28/STING1/TMIGD2/RGCC/MYB/LTA/ITK/CCR7/LTB/IL17RA/CD6/APP/IL23A/IL27RA/CRTAM/IKBKE/TRAF3IP3/MAPK13/NLRP1/AGER/GPSM3/HK1/RPS3/SOD1/TXK/CD3E/PIBF1/PRKCQ/STAT1/SPTBN1/DDT/MIF/ZC3HAV1/STAT5B/PIK3CD/HSPD1/FOXP1/IL16/ARID5A/MALT1/DDX21/CASP8	47
celltypes.CD4 T cell.up	celltypes	CD4 T cell	up	BP	GO:0032615	interleukin-12 production	12/889	57/14457	0.210526	3.4236	4.69282	0.000146689	0.0140908	0.0135241	CD40LG/CCR7/LTB/JAK3/IL23A/C1QBP/AGER/PIBF1/ARRB2/HSPD1/FOXP1/IL16	12
celltypes.CD4 T cell.up	celltypes	CD4 T cell	up	BP	GO:0045580	regulation of T cell differentiation	24/889	173/14457	0.138728	2.25601	4.25412	0.000151688	0.0141707	0.0136008	CAMK4/LEF1/TESPA1/CD28/TCF7/CD27/JAK3/IL7R/IL23A/ZC3H8/CRTAM/ZEB1/SOD1/ITPKB/CYLD/NFKBIZ/TGFBR2/PHF10/RHOH/STAT5B/PRDX2/MALT1/ZAP70/JUNB	24
celltypes.CD4 T cell.up	celltypes	CD4 T cell	up	BP	GO:1904667	negative regulation of ubiquitin protein ligase activity	5/889	10/14457	0.5	8.13105	5.77406	0.000168914	0.015173	0.0145628	USP44/RPL11/RPL5/RPL23/RPS7	5
celltypes.CD4 T cell.up	celltypes	CD4 T cell	up	BP	GO:0046651	lymphocyte proliferation	32/889	264/14457	0.121212	1.97116	4.07637	0.000182835	0.0161136	0.0154656	CD40LG/AIF1/LEF1/IL6ST/TNFSF13B/CD28/TMIGD2/IL7R/CD6/IL23A/CRTAM/NDFIP1/NCK2/TNFSF8/RIPOR2/CCND3/AGER/RPS3/RPS6/IMPDH2/NFKBIZ/CD3E/ATM/PRKCQ/TGFBR2/LMBR1L/MIF/STAT5B/PRDX2/HSPD1/MALT1/ZAP70	32
celltypes.CD4 T cell.up	celltypes	CD4 T cell	up	BP	GO:0070670	response to interleukin-4	9/889	35/14457	0.257143	4.18168	4.82386	0.000199414	0.0172493	0.0165556	LEF1/TCF7/JAK3/RPL3/IMPDH2/RPLP0/HSPA5/STAT5B/HSP90AB1	9
celltypes.CD4 T cell.up	celltypes	CD4 T cell	up	BP	GO:0075522	IRES-dependent viral translational initiation	5/889	11/14457	0.454545	7.39186	5.42834	0.00029401	0.0225704	0.0216627	EIF2D/CSDE1/EIF3F/PCBP2/EIF3D	5
celltypes.CD4 T cell.up	celltypes	CD4 T cell	up	BP	GO:0032943	mononuclear cell proliferation	32/889	271/14457	0.118081	1.92025	3.9145	0.000294753	0.0225704	0.0216627	CD40LG/AIF1/LEF1/IL6ST/TNFSF13B/CD28/TMIGD2/IL7R/CD6/IL23A/CRTAM/NDFIP1/NCK2/TNFSF8/RIPOR2/CCND3/AGER/RPS3/RPS6/IMPDH2/NFKBIZ/CD3E/ATM/PRKCQ/TGFBR2/LMBR1L/MIF/STAT5B/PRDX2/HSPD1/MALT1/ZAP70	32
celltypes.CD4 T cell.up	celltypes	CD4 T cell	up	BP	GO:0043065	positive regulation of apoptotic process	50/889	493/14457	0.10142	1.6493	3.75475	0.000330344	0.0237391	0.0227844	MAL/CD40LG/NET1/ITGA6/MYC/RGCC/MYB/LTA/LTB/BNIP3/APBB1/CDK5R1/APP/ZC3H8/MAP2K6/TFAP4/LCK/CASP6/NCK2/PLCG1/MYBBP1A/SMPD1/TNFSF10/C1QBP/CASP10/FOXO1/TNFRSF10B/TNFAIP8/FAM162A/TNFRSF10A/RPS3/RPS6/SOD1/RACK1/CYLD/ATM/PRMT2/TLE5/RPL26/PRKCI/RRP1B/PDCD2/PIK3CD/MCL1/HSPD1/RPS7/PDCD5/CASP8/BNIP3L/STK17B	50
celltypes.CD4 T cell.up	celltypes	CD4 T cell	up	BP	GO:2000106	regulation of leukocyte apoptotic process	14/889	81/14457	0.17284	2.81073	4.18307	0.000382917	0.0266931	0.0256197	GIMAP8/CD27/CCR7/JAK3/IL7R/BCL11B/ZC3H8/CD3G/ITPKB/PRKCQ/MIF/PIK3CD/FOXP1/ST3GAL1	14
celltypes.CD4 T cell.up	celltypes	CD4 T cell	up	BP	GO:0002520	immune system development	24/889	184/14457	0.130435	2.12114	3.91768	0.000388596	0.0266931	0.0256197	CD40LG/SLC40A1/ICOS/LEF1/CCR4/CD28/LTA/LTB/IL7R/BCL11B/IL27RA/NDFIP1/SAMHD1/SOD1/MSH2/SBDS/NFKBIZ/CD3E/ATM/TGFBR2/STAT5B/PRDX2/CTC1/HSPD1	24
celltypes.CD4 T cell.up	celltypes	CD4 T cell	up	BP	GO:0006979	response to oxidative stress	39/889	365/14457	0.106849	1.73759	3.65337	0.000535717	0.0342785	0.0329	AIF1/NET1/FBLN5/PLK3/MYB/GGT7/BNIP3/APP/IPCEF1/TRAP1/FXN/SELENON/PSMB5/MAPK13/FOXO1/NDUFA12/GPX7/RPS3/SOD1/RACK1/KDM6B/RGS14/ATM/PYCR2/PSIP1/HMOX2/ERCC6L2/ZNF277/STAT1/ERO1A/PXN/OXR1/PRDX2/GPX4/FOXP1/PPIA/RWDD1/KLF2/SESN3	39
celltypes.CD4 T cell.up	celltypes	CD4 T cell	up	BP	GO:0043087	regulation of GTPase activity	21/889	156/14457	0.134615	2.18913	3.8223	0.000576973	0.0364195	0.0349549	NET1/ITGA6/TIAM1/RGS10/RAPGEF6/DOCK9/TBC1D15/SNX9/RASGRP2/LIMS1/RIPOR2/SOD1/RACK1/FGD3/SEMA4D/RAB3GAP1/STMN1/LARS1/DOCK10/RRP1B/S100A10	21
celltypes.CD4 T cell.up	celltypes	CD4 T cell	up	BP	GO:0071353	cellular response to interleukin-4	8/889	33/14457	0.242424	3.94233	4.33134	0.000692669	0.0404432	0.0388168	LEF1/TCF7/JAK3/RPL3/IMPDH2/RPLP0/HSPA5/HSP90AB1	8
celltypes.CD4 T cell.up	celltypes	CD4 T cell	up	BP	GO:1904666	regulation of ubiquitin protein ligase activity	6/889	19/14457	0.315789	5.1354	4.61698	0.000721006	0.0408228	0.0391811	USP44/RPL11/RPL5/RPL23/RPS7/SKP1	6
celltypes.CD4 T cell.up	celltypes	CD4 T cell	up	BP	GO:0046037	GMP metabolic process	7/889	26/14457	0.269231	4.37826	4.41314	0.000760347	0.0408228	0.0391811	MAGI3/PAICS/ADSL/IMPDH2/PPAT/APRT/ATIC	7
celltypes.CD4 T cell.up	celltypes	CD4 T cell	up	BP	GO:2000059	negative regulation of ubiquitin-dependent protein catabolic process	10/889	50/14457	0.2	3.25242	4.0838	0.000794845	0.0420805	0.0403883	FHIT/RPL11/EIF3H/RPL5/STYX/NOP53/RPL23/RPS7/CAMLG/HSP90AB1	10
celltypes.CD4 T cell.up	celltypes	CD4 T cell	up	BP	GO:2000316	regulation of T-helper 17 type immune response	8/889	34/14457	0.235294	3.82637	4.22336	0.000857615	0.0440211	0.0422508	JAK3/IL23A/IL27RA/NFKBIZ/PRKCQ/ARID5A/MALT1/JUNB	8
celltypes.CD4 T cell.up	celltypes	CD4 T cell	up	BP	GO:0060326	cell chemotaxis	28/889	241/14457	0.116183	1.88937	3.56386	0.000886051	0.0449863	0.0431772	MMP28/AIF1/IL6R/MTUS1/LEF1/CCR4/TIAM1/DPP4/SLC8B1/CCR7/IL17RA/APP/IL23A/C1QBP/RIPOR2/GPSM3/RPL13A/SBDS/PRKCQ/CALR/DDT/MIF/ARRB2/PIK3CD/IL16/PPIA/RPS19/TMSB4X	28
celltypes.CD4 T cell.up	celltypes	CD4 T cell	up	BP	GO:0050729	positive regulation of inflammatory response	18/889	130/14457	0.138462	2.25167	3.66946	0.000997375	0.049561	0.047568	IL6ST/CD28/LTA/CCR7/IL17RA/LDLR/APP/IL23A/MAPK13/NLRP1/ETS1/GPSM3/NFKBIZ/DDT/STAT5B/IL16/RPS19/GBP2	18
celltypes.CD4 T cell.up	celltypes	CD4 T cell	up	BP	GO:0048291	isotype switching to IgG isotypes	5/889	14/14457	0.357143	5.80789	4.60688	0.00109085	0.0525595	0.0504458	CD28/IL27RA/NDFIP1/MSH2/HSPD1	5
celltypes.CD4 T cell.up	celltypes	CD4 T cell	up	BP	GO:0034614	cellular response to reactive oxygen species	18/889	131/14457	0.137405	2.23449	3.63309	0.00109147	0.0525595	0.0504458	NET1/FBLN5/MYB/BNIP3/TRAP1/FXN/MAPK13/RPS3/SOD1/RACK1/KDM6B/ATM/ERCC6L2/ZNF277/PXN/PRDX2/FOXP1/KLF2	18
celltypes.CD4 T cell.up	celltypes	CD4 T cell	up	BP	GO:0002688	regulation of leukocyte chemotaxis	15/889	104/14457	0.144231	2.34549	3.52488	0.00169024	0.0759145	0.0728616	MMP28/AIF1/IL6R/MTUS1/DPP4/SLC8B1/CCR7/APP/IL23A/C1QBP/RIPOR2/GPSM3/CALR/DDT/MIF	15
celltypes.CD4 T cell.up	celltypes	CD4 T cell	up	BP	GO:0043547	positive regulation of GTPase activity	15/889	105/14457	0.142857	2.32316	3.4831	0.00186265	0.0798204	0.0766105	NET1/ITGA6/TIAM1/RGS10/RAPGEF6/DOCK9/SNX9/RASGRP2/LIMS1/RACK1/SEMA4D/RAB3GAP1/LARS1/DOCK10/S100A10	15
celltypes.CD4 T cell.up	celltypes	CD4 T cell	up	BP	GO:0036462	TRAIL-activated apoptotic signaling pathway	4/889	10/14457	0.4	6.50484	4.45731	0.00221101	0.0898055	0.086194	TNFSF10/TNFRSF10B/TNFRSF10A/CASP8	4
celltypes.CD4 T cell.up	celltypes	CD4 T cell	up	BP	GO:0050920	regulation of chemotaxis	21/889	175/14457	0.12	1.95145	3.24137	0.00251233	0.101165	0.0970963	MMP28/AIF1/IL6R/MTUS1/CCR4/TIAM1/DPP4/SLC8B1/CCR7/ROBO3/APP/IL23A/C1QBP/RIPOR2/AGER/GPSM3/CALR/DDT/MIF/IL16/TMSB4X	21
celltypes.CD4 T cell.up	celltypes	CD4 T cell	up	BP	GO:0032946	positive regulation of mononuclear cell proliferation	17/889	130/14457	0.130769	2.12658	3.30273	0.00254341	0.101541	0.0974575	CD40LG/AIF1/IL6ST/TNFSF13B/CD28/TMIGD2/CD6/IL23A/NCK2/AGER/RPS3/CD3E/PRKCQ/TGFBR2/MIF/STAT5B/ZAP70	17
celltypes.CD4 T cell.up	celltypes	CD4 T cell	up	BP	GO:0009303	rRNA transcription	8/889	40/14457	0.2	3.25242	3.65139	0.00261961	0.103076	0.0989306	MACROH2A2/NPM3/GTF2H5/GTF3A/NOP53/POLR1E/NIFK/POLR1D	8
celltypes.CD4 T cell.up	celltypes	CD4 T cell	up	BP	GO:0002285	lymphocyte activation involved in immune response	23/889	199/14457	0.115578	1.87954	3.19793	0.00262599	0.103076	0.0989306	CD40LG/IL6R/ICOS/LEF1/SOCS3/IL6ST/CD28/MYB/JAK3/IL23A/IL27RA/ITM2A/NDFIP1/MFNG/RPS6/MSH2/NFKBIZ/DOCK10/HSPD1/FOXP1/ST3GAL1/MALT1/JUNB	23
celltypes.CD4 T cell.up	celltypes	CD4 T cell	up	BP	GO:0000302	response to reactive oxygen species	21/889	176/14457	0.119318	1.94036	3.21284	0.00269235	0.1048	0.100585	NET1/FBLN5/PLK3/MYB/BNIP3/TRAP1/FXN/MAPK13/RPS3/SOD1/RACK1/KDM6B/ATM/ERCC6L2/ZNF277/STAT1/PXN/PRDX2/FOXP1/KLF2/SESN3	21
celltypes.CD4 T cell.up	celltypes	CD4 T cell	up	BP	GO:0034975	protein folding in endoplasmic reticulum	4/889	11/14457	0.363636	5.91349	4.17282	0.00330644	0.119724	0.114909	HSP90B1/CALR/ERO1A/HSPA5	4
celltypes.CD4 T cell.up	celltypes	CD4 T cell	up	BP	GO:0045333	cellular respiration	25/889	229/14457	0.10917	1.77534	3.02729	0.00378813	0.130106	0.124874	BNIP3/TRAP1/FXN/COA6/MYBBP1A/ETFRF1/NDUFB9/SUCLG2/NDUFA12/SLC25A23/ATP5PO/ADSL/ATP5F1E/MSH2/LYRM7/COX7C/NOP53/UQCRB/NDUFS5/COX6C/ATP5MG/COX4I1/ATP5PD/COX7A2L/NDUFB1	25
celltypes.CD4 T cell.up	celltypes	CD4 T cell	up	BP	GO:0050900	leukocyte migration	32/889	323/14457	0.0990712	1.61111	2.84316	0.00524776	0.159171	0.15277	ADTRP/MMP28/AIF1/IL6R/ITGA6/MTUS1/DPP4/SLC8B1/SELL/CCR7/IL17RA/APP/IL23A/IL27RA/CRTAM/LCK/C1QBP/RIPOR2/AGER/GPSM3/RPL13A/SBDS/CALR/DDT/MIF/STAT5B/PIK3CD/IL16/PPIA/ZAP70/RPS19/ITGB7	32
celltypes.CD4 T cell.up	celltypes	CD4 T cell	up	BP	GO:0006119	oxidative phosphorylation	17/889	140/14457	0.121429	1.97468	2.96632	0.00548871	0.164577	0.157958	FXN/COA6/NDUFB9/NDUFA12/SLC25A23/ATP5PO/ATP5F1E/MSH2/COX7C/UQCRB/NDUFS5/COX6C/ATP5MG/COX4I1/ATP5PD/COX7A2L/NDUFB1	17
celltypes.CD4 T cell.up	celltypes	CD4 T cell	up	BP	GO:0051348	negative regulation of transferase activity	18/889	152/14457	0.118421	1.92577	2.93697	0.00565945	0.168378	0.161606	PKIA/USP44/GNAQ/TRIB2/DBNDD2/TFAP4/NPM1/DUSP7/RPL11/RPL5/RGS14/RPL23/IPO7/RTRAF/IPO5/PPIA/RPS7/EIF4A2	18
celltypes.CD4 T cell.up	celltypes	CD4 T cell	up	BP	GO:0098761	cellular response to interleukin-7	5/889	20/14457	0.25	4.06552	3.51154	0.00620784	0.180801	0.17353	JAK3/IL7R/ATIC/STAT1/HSPD1	5
celltypes.CD4 T cell.up	celltypes	CD4 T cell	up	BP	GO:0090330	regulation of platelet aggregation	6/889	28/14457	0.214286	3.48473	3.36867	0.00623186	0.180801	0.17353	IL6R/IL6ST/PRKCA/SERPINE2/UBASH3B/PRKCQ	6
celltypes.CD4 T cell.up	celltypes	CD4 T cell	up	BP	GO:0048302	regulation of isotype switching to IgG isotypes	4/889	13/14457	0.307692	5.00372	3.69665	0.00649013	0.184573	0.17715	CD28/IL27RA/NDFIP1/MSH2	4
celltypes.CD4 T cell.up	celltypes	CD4 T cell	up	BP	GO:1901163	regulation of trophoblast cell migration	4/889	13/14457	0.307692	5.00372	3.69665	0.00649013	0.184573	0.17715	TIMP1/C1QBP/CALR/ARHGDIB	4
celltypes.CD4 T cell.up	celltypes	CD4 T cell	up	BP	GO:0046390	ribose phosphate biosynthetic process	19/889	167/14457	0.113772	1.85018	2.82858	0.00699439	0.193318	0.185544	AK5/PAICS/NDUFB9/NDUFA12/ATP5PO/ADSL/ATP5F1E/IMPDH2/PPAT/NDUFS5/ATP5MG/NME2/APRT/ATP5PD/ATIC/NDUFB1/ATP5MJ/ATP5MC2/TMSB4X	19
celltypes.CD4 T cell.up	celltypes	CD4 T cell	up	BP	GO:0071676	negative regulation of mononuclear cell migration	6/889	29/14457	0.206897	3.36457	3.26261	0.00745713	0.202513	0.194369	ADTRP/MMP28/IL27RA/RIPOR2/DDT/MIF	6
celltypes.CD4 T cell.up	celltypes	CD4 T cell	up	BP	GO:0098760	response to interleukin-7	5/889	21/14457	0.238095	3.87193	3.37114	0.00774242	0.203477	0.195294	JAK3/IL7R/ATIC/STAT1/HSPD1	5
celltypes.CD4 T cell.up	celltypes	CD4 T cell	up	BP	GO:0006935	chemotaxis	34/889	358/14457	0.0949721	1.54444	2.67004	0.00776534	0.203477	0.195294	MMP28/AIF1/IL6R/CMTM8/MTUS1/LEF1/CCR4/TIAM1/DPP4/SLC8B1/CCR7/SEMA4C/ROBO3/IL17RA/APP/IL23A/C1QBP/RIPOR2/AGER/GPSM3/RPL13A/SBDS/SEMA4D/PRKCQ/CALR/DDT/MIF/ARRB2/PIK3CD/IL16/PPIA/RALA/RPS19/TMSB4X	34
celltypes.CD4 T cell.up	celltypes	CD4 T cell	up	BP	GO:0042113	B cell activation	26/889	255/14457	0.101961	1.6581	2.71395	0.00779755	0.203477	0.195294	CD40LG/LEF1/TNFSF13B/CD28/CD27/JAK3/IL7R/IL27RA/ITM2A/NDFIP1/FLT3LG/MFNG/CYLD/MSH2/NFKBIZ/ATM/DOCK10/MIF/STAT5B/PIK3CD/HSPD1/ST3GAL1/IGBP1/MALT1/ZAP70/CASP8	26
celltypes.CD4 T cell.up	celltypes	CD4 T cell	up	BP	GO:0008637	apoptotic mitochondrial changes	13/889	100/14457	0.13	2.11407	2.86153	0.00815425	0.208134	0.199764	THEM4/BNIP3/RTL10/PLSCR3/IER3/PIM2/FXN/TNFSF10/FAM162A/MCL1/HSPD1/SLC25A6/BNIP3L	13
celltypes.CD4 T cell.up	celltypes	CD4 T cell	up	BP	GO:2001244	positive regulation of intrinsic apoptotic signaling pathway	9/889	58/14457	0.155172	2.52343	2.97568	0.00848456	0.212924	0.204361	MYC/LCK/NCK2/RPS3/SOD1/RACK1/RPL26/MCL1/RPS7	9
celltypes.CD4 T cell.up	celltypes	CD4 T cell	up	BP	GO:0072537	fibroblast activation	4/889	14/14457	0.285714	4.64631	3.49387	0.00864984	0.212924	0.204361	RGCC/MYB/IL17RA/ULK3	4
celltypes.CD4 T cell.up	celltypes	CD4 T cell	up	BP	GO:0097396	response to interleukin-17	4/889	14/14457	0.285714	4.64631	3.49387	0.00864984	0.212924	0.204361	SOCS3/IL17RA/IKBKE/NFKBIZ	4
celltypes.CD4 T cell.up	celltypes	CD4 T cell	up	BP	GO:0097398	cellular response to interleukin-17	4/889	14/14457	0.285714	4.64631	3.49387	0.00864984	0.212924	0.204361	SOCS3/IL17RA/IKBKE/NFKBIZ	4
celltypes.CD4 T cell.up	celltypes	CD4 T cell	up	BP	GO:0141161	regulation of cAMP/PKA signal transduction	4/889	14/14457	0.285714	4.64631	3.49387	0.00864984	0.212924	0.204361	PRKAR1B/PKIA/APP/MIF	4
celltypes.CD4 T cell.up	celltypes	CD4 T cell	up	BP	GO:0051651	maintenance of location in cell	20/889	183/14457	0.10929	1.77728	2.70861	0.00888891	0.212924	0.204361	CD4/PLCL1/SLC8B1/ANK3/UBASH3B/CCR7/ARHGAP21/SELENON/LCK/PLCG1/LIME1/SLC25A23/HK1/CALM3/HSP90B1/CALR/ERO1A/HSPA5/CALM1/SKP1	20
celltypes.CD4 T cell.up	celltypes	CD4 T cell	up	BP	GO:0002562	somatic diversification of immune receptors via germline recombination within a single locus	10/889	69/14457	0.144928	2.35682	2.89178	0.00919256	0.216708	0.207993	CD40LG/LEF1/CD28/BCL11B/IL27RA/NDFIP1/MSH2/NFKBIZ/ATM/HSPD1	10
celltypes.CD4 T cell.up	celltypes	CD4 T cell	up	BP	GO:0051208	sequestering of calcium ion	14/889	113/14457	0.123894	2.01477	2.77198	0.00937801	0.216708	0.207993	PLCL1/SLC8B1/UBASH3B/CCR7/SELENON/LCK/PLCG1/LIME1/SLC25A23/CALM3/HSP90B1/CALR/ERO1A/CALM1	14
celltypes.CD4 T cell.up	celltypes	CD4 T cell	up	BP	GO:1902807	negative regulation of cell cycle G1/S phase transition	9/889	59/14457	0.152542	2.48066	2.91707	0.00948097	0.216708	0.207993	PLK3/APBB1/FHL1/ACVR1/RBL2/CRLF3/PRMT2/CTDSP2/TMSB4X	9
celltypes.CD4 T cell.up	celltypes	CD4 T cell	up	BP	GO:0009206	purine ribonucleoside triphosphate biosynthetic process	13/889	104/14457	0.125	2.03276	2.70559	0.0112126	0.244738	0.234896	NDUFB9/NDUFA12/ATP5PO/ATP5F1E/IMPDH2/NDUFS5/ATP5MG/NME2/ATP5PD/NDUFB1/ATP5MJ/ATP5MC2/TMSB4X	13
celltypes.CD4 T cell.up	celltypes	CD4 T cell	up	BP	GO:0036092	phosphatidylinositol-3-phosphate biosynthetic process	5/889	23/14457	0.217391	3.53524	3.11463	0.0115638	0.246925	0.236995	INPP4B/SYNJ2/ATM/PIK3CD/INPP4A	5
celltypes.CD4 T cell.up	celltypes	CD4 T cell	up	BP	GO:0044092	negative regulation of molecular function	42/889	477/14457	0.0880503	1.43188	2.45521	0.0119984	0.248145	0.238166	NOG/KCNQ1/LEF1/PKIA/SERPINE2/ANK3/USP44/GNAQ/TRIB2/DBNDD2/NDFIP1/TFAP4/TIMP1/NPM1/HABP4/DUSP7/RPL11/RIPOR2/SPOCK2/NOSIP/RACK1/COMMD6/RPL5/CYLD/STYX/CALM3/RGS14/PRMT2/STMN1/ABCE1/RPL23/TLE5/IPO7/ARRB2/RTRAF/RRP1B/IPO5/URI1/PPIA/RPS7/CALM1/EIF4A2	42
celltypes.CD4 T cell.up	celltypes	CD4 T cell	up	CC	GO:0022626	cytosolic ribosome	83/921	110/15236	0.754545	12.4824	30.6564	1.60687e-78	9.25558e-76	8.82934e-76	RPL39/RPS3A/EIF2A/RPL32/RPL35A/RPL22/RPL10A/RPL9/RPL38/RPL4/RPL34/RPS8/RPS2/RPS13/RPS21/RPL13/RPL31/RPL36/RPL12/RPL11/RPL27/RPL24/RPL30/RPL3/RPS25/RPS5/RPL19/RPS28/RPL10/RPL14/RPS15A/RPSA/RPS24/RPL29/RPS9/RPL36A/RPL21/RPL7/RPS14/RPS27A/RPS4X/RPS12/RPL37/RPS29/RPS3/RPS6/RPS18/RPS10/RACK1/RPL5/RPS15/RPL41/RPL13A/RPLP2/RPLP0/EEF1A1/RPL27A/RPL17/RPS26/RPS20/RPL18/RPS27/RPL28/RPS16/RPS23/RPL35/ABCE1/R…	83
celltypes.CD4 T cell.up	celltypes	CD4 T cell	up	CC	GO:0032040	small-subunit processome	27/921	72/15236	0.375	6.20358	11.2258	2.96945e-15	2.138e-13	2.03954e-13	RPS3A/RPS8/RPS13/RPS5/RPS28/RPS15A/RPS24/RPS9/RPS14/DIMT1/RPS27A/RPS4X/RPS12/RPS6/WDR75/WDR43/FBL/RPS27/RPS16/RPS23/RPS17/WDR3/RPS7/NOP56/NOP58/RPS19/RPS11	27
celltypes.CD4 T cell.up	celltypes	CD4 T cell	up	CC	GO:0005925	focal adhesion	67/921	410/15236	0.163415	2.70335	8.86828	6.12404e-14	3.52745e-12	3.365e-12	FBLN7/ITGA6/ACTN1/TNFSF13B/PRAG1/DPP4/FLNB/LMO7/TLE2/FHL1/RPS3A/NPM1/RPL22/RPL10A/RPL9/RPL38/RPL4/RPS8/RPS2/LIMS1/RPS13/PABPC1/RPL31/RPL12/RPL27/RPL30/RPL3/RPS5/REXO2/RPL19/RPS9/RPL7/RPS14/VIM/RPS4X/RPS29/RPS3/RPS18/RPS10/RPL5/RPS15/RPL13A/RPLP2/RPLP0/RPL18/RPS16/RPL23/RPS17/RPL8/RPL37A/HSP90B1/RPLP1/RPL7A/CALR/HSPA5/PXN/CBL/HSPA8/IL16/PPIA/RPS7/RALA/RPS19/PCBP2/ITGB7/EVL/RPS11	67
celltypes.CD4 T cell.up	celltypes	CD4 T cell	up	CC	GO:0042101	T cell receptor complex	8/921	16/15236	0.5	8.27144	7.38123	1.44019e-06	6.91291e-05	6.59455e-05	CD4/TRAT1/CD6/CD3D/CD3G/CD3E/SKAP1/ZAP70	8
celltypes.CD4 T cell.up	celltypes	CD4 T cell	up	CC	GO:0033290	eukaryotic 48S preinitiation complex	8/921	17/15236	0.470588	7.78489	7.09953	2.57616e-06	0.000114143	0.000108887	EIF3E/EIF3H/EIF3M/EIF3K/EIF3F/EIF3L/EIF3D/EIF1	8
celltypes.CD4 T cell.up	celltypes	CD4 T cell	up	CC	GO:0005852	eukaryotic translation initiation factor 3 complex	7/921	16/15236	0.4375	7.23751	6.33169	2.03564e-05	0.00073283	0.000699081	EIF3E/EIF3H/EIF3M/EIF3K/EIF3F/EIF3L/EIF3D	7
celltypes.CD4 T cell.up	celltypes	CD4 T cell	up	CC	GO:0014069	postsynaptic density	37/921	338/15236	0.109467	1.81091	3.82403	0.000339303	0.0114964	0.0109669	TIAM1/LZTS3/DISC1/BNIP3/SEMA4C/CDK5R1/EIF3E/SYNGAP1/CNKSR2/ARHGAP32/ADD3/RPL10A/RPL38/NCK2/RPS13/RPL12/RPL30/SIGMAR1/RPS25/DNAJB1/RPL14/RPL7/RPS14/RPS3/ATP1A1/RPS18/RPLP0/RGS14/RPS27/SLC16A7/RPL8/SPTBN1/CAMK2G/RPS19/PCBP2/CAPZB/INPP4A	37
celltypes.CD4 T cell.up	celltypes	CD4 T cell	up	CC	GO:0001772	immunological synapse	10/921	47/15236	0.212766	3.51976	4.38833	0.000414149	0.0132528	0.0126424	CD28/LAT/CD6/CRTAM/LCK/CD3E/PRKCQ/SKAP1/RHOH/ZAP70	10
celltypes.CD4 T cell.up	celltypes	CD4 T cell	up	CC	GO:0005687	U4 snRNP	5/921	12/15236	0.416667	6.89287	5.17975	0.000442214	0.0134061	0.0127887	SNRPE/SNRPN/SNRPD2/SNRPF/DDX39B	5
celltypes.CD4 T cell.up	celltypes	CD4 T cell	up	CC	GO:0032279	asymmetric synapse	37/921	353/15236	0.104816	1.73396	3.5389	0.000774957	0.0223188	0.0212909	TIAM1/LZTS3/DISC1/BNIP3/SEMA4C/CDK5R1/EIF3E/SYNGAP1/CNKSR2/ARHGAP32/ADD3/RPL10A/RPL38/NCK2/RPS13/RPL12/RPL30/SIGMAR1/RPS25/DNAJB1/RPL14/RPL7/RPS14/RPS3/ATP1A1/RPS18/RPLP0/RGS14/RPS27/SLC16A7/RPL8/SPTBN1/CAMK2G/RPS19/PCBP2/CAPZB/INPP4A	37
celltypes.CD4 T cell.up	celltypes	CD4 T cell	up	CC	GO:0001650	fibrillar center	18/921	144/15236	0.125	2.06786	3.26571	0.00265919	0.0643555	0.0613917	FHIT/CAMK4/ARHGAP32/TAF4B/DEAF1/POLR1C/URB1/AGER/WDR43/FBL/NOP53/POLR1E/MALT1/NOP56/NOP58/EIF3L/UBTF/EEF1D	18
celltypes.CD4 T cell.up	celltypes	CD4 T cell	up	CC	GO:0045259	proton-transporting ATP synthase complex	5/921	17/15236	0.294118	4.86556	4.04482	0.00268148	0.0643555	0.0613917	ATP5PO/ATP5F1E/ATP5MG/ATP5PD/ATP5MJ	5
celltypes.CD4 T cell.up	celltypes	CD4 T cell	up	CC	GO:0098803	respiratory chain complex	14/921	101/15236	0.138614	2.29307	3.30711	0.00296586	0.0683334	0.0651864	NDUFB9/NDUFA12/ATP5PO/ATP5F1E/COX7C/UQCRB/NDUFS5/COX6C/ATP5MG/COX4I1/ATP5PD/COX7A2L/NDUFB1/ATP5MJ	14
celltypes.CD4 T cell.up	celltypes	CD4 T cell	up	CC	GO:0005743	mitochondrial inner membrane	44/921	476/15236	0.092437	1.52917	2.97519	0.00328301	0.0727314	0.0693819	THEM4/LDHB/SLC8B1/GRPEL2/DMAC1/TWNK/APP/PLSCR3/MCUB/TRAP1/PLA2G4B/MRPS33/TIMM9/MRPL17/SFXN1/NDUFB9/NDUFA12/SLC25A23/MRPL32/ATP5PO/RPS3/MRPL45/ATP5F1E/COX7C/COA1/DAP3/UQCRB/NDUFS5/MRPL3/COX6C/ATP5MG/COX4I1/ATP5PD/MRPL41/MRPS24/MRPS25/NDUFAF2/COX7A2L/LETMD1/HSPD1/NDUFB1/ATP5MJ/SLC25A6/ATP5MC2	44
celltypes.CD4 T cell.up	celltypes	CD4 T cell	up	CC	GO:0008180	COP9 signalosome	7/921	35/15236	0.2	3.30858	3.46815	0.00436791	0.093182	0.0888907	TESPA1/THEMIS/LAT/GRAP/PLCG1/HSPA5/HSP90AB1	7
celltypes.CD4 T cell.up	celltypes	CD4 T cell	up	CC	GO:0005791	rough endoplasmic reticulum	9/921	54/15236	0.166667	2.75715	3.28092	0.00471965	0.0970899	0.0926187	CKAP4/RPL4/RPS21/RPL27/RPS28/RPS29/RPS26/RPL18/RPS23	9
celltypes.CD4 T cell.up	celltypes	CD4 T cell	up	CC	GO:0034709	methylosome	4/921	13/15236	0.307692	5.09012	3.74208	0.0061085	0.1135	0.108273	CLNS1A/SNRPE/SNRPD2/SNRPF	4
celltypes.CD4 T cell.up	celltypes	CD4 T cell	up	CC	GO:0098554	cytoplasmic side of endoplasmic reticulum membrane	5/921	22/15236	0.227273	3.75975	3.2856	0.00887553	0.154918	0.147784	RPL27/RPS28/OTULINL/RPS29/RPS26	5
celltypes.CD4 T cell.up	celltypes	CD4 T cell	up	CC	GO:0045121	membrane raft	25/921	254/15236	0.0984252	1.62824	2.56101	0.0112008	0.189754	0.181016	ADTRP/MAL/CD4/KCNQ1/IL6ST/LDHB/DPP4/LAT/PAG1/IGF1R/APP/SYNJ2/RGMB/IRS1/LCK/EEIG1/TNFRSF10A/HK1/ATP1A1/TGFBR2/SKAP1/CBL/S100A10/ZAP70/CD48	25
celltypes.CD4 T cell.up	celltypes	CD4 T cell	up	CC	GO:0005819	spindle	37/921	416/15236	0.0889423	1.47136	2.47248	0.0119692	0.196516	0.187466	MTUS1/TRAT1/TACC3/PLK3/CHMP7/USP44/ALPK1/APP/NPM1/MZT2A/MZT2B/TRAPPC14/KIF2A/BEX4/SGF29/TPT1/UXT/CDC25B/CDC14A/RPS3/CYLD/HAUS4/CHMP3/SEPTIN6/CALM3/SBDS/RGS14/ATM/TAF1D/NSMCE1/RTRAF/PRPF19/EPB41/EML4/CALM1/ANXA11/MAP7D1	37
celltypes.CD4 T cell.up	celltypes	CD4 T cell	up	CC	GO:0036019	endolysosome	5/921	25/15236	0.2	3.30858	2.93016	0.015417	0.240005	0.228952	CTSL/LDLR/SMPD1/CTSB/AP2A2	5
celltypes.CD4 T cell.up	celltypes	CD4 T cell	up	MF	GO:0003735	structural constituent of ribosome	88/915	154/14933	0.571429	9.32584	26.5334	2.35726e-66	2.27947e-63	2.23815e-63	RPL39/RPS3A/RPL32/RPL35A/RPL22/RPL10A/RPL9/RPL38/RPL4/RPL34/RPS8/RPS2/RPS13/RPS21/RPL13/RPL31/MRPS33/MRPL17/RPL36/RPL12/RPL11/RPL27/RPL24/RPL30/RPL3/RPS25/RPS5/RPL19/RPS28/RPL10/RPL14/RPS15A/RPSA/RPS24/MRPL32/RPL29/RPS9/RPL36A/RPL21/RPL7/RPS14/RPS27A/RPS4X/RPS12/RPL37/RPS29/RPS3/RPS6/RPS18/RPS10/RPL5/MRPL45/RPS15/RPL41/RPL13A/RPLP2/RPLP0/RPL27A/DAP3/RPL17/RPS26/RPS20/RPL18/RPS27/RPL28/RPS16/MRPL3…	88
celltypes.CD4 T cell.up	celltypes	CD4 T cell	up	MF	GO:0019843	rRNA binding	24/915	62/14933	0.387097	6.3175	10.7191	6.06452e-14	2.9322e-11	2.87905e-11	MTERF4/NPM1/RPL9/RPS13/RRS1/RPL12/RPL11/RPS5/RPS9/RPS4X/FASTKD2/RPL37/RPS3/RPS18/GTF3A/RPL5/SBDS/RPLP0/NOP53/RPL23/RPL8/RPL23A/DDX21/RPS11	24
celltypes.CD4 T cell.up	celltypes	CD4 T cell	up	MF	GO:0008135	translation factor activity, RNA binding	20/915	81/14933	0.246914	4.02968	6.98512	5.98277e-08	1.80422e-05	1.77152e-05	EIF3E/EEF1B2/EIF2A/EIF2D/EIF3H/EEF1G/MTRFR/EIF3M/EEF1A1/EIF3K/EEF2/HBS1L/EIF2S3/EIF3F/EIF3L/EIF4B/EIF4A2/EEF1D/EIF3D/EIF1	20
celltypes.CD4 T cell.up	celltypes	CD4 T cell	up	MF	GO:0180051	translation factor activity	20/915	82/14933	0.243902	3.98054	6.91434	7.46318e-08	1.80422e-05	1.77152e-05	EIF3E/EEF1B2/EIF2A/EIF2D/EIF3H/EEF1G/MTRFR/EIF3M/EEF1A1/EIF3K/EEF2/HBS1L/EIF2S3/EIF3F/EIF3L/EIF4B/EIF4A2/EEF1D/EIF3D/EIF1	20
celltypes.CD4 T cell.up	celltypes	CD4 T cell	up	MF	GO:1990948	ubiquitin ligase inhibitor activity	7/915	10/14933	0.7	11.4242	8.4244	3.23232e-07	6.25131e-05	6.13801e-05	RPL11/RPL37/RPL5/RPS15/RPS20/RPL23/RPS7	7
celltypes.CD4 T cell.up	celltypes	CD4 T cell	up	MF	GO:0048027	mRNA 5'-UTR binding	9/915	24/14933	0.375	6.12008	6.41335	6.62576e-06	0.000798763	0.000784286	RPS3A/RPS13/RSL1D1/GNL3/RPS14/RPL5/RPL41/RPL26/RPS7	9
celltypes.CD4 T cell.up	celltypes	CD4 T cell	up	MF	GO:0045296	cadherin binding	41/915	323/14933	0.126935	2.07161	4.97437	7.30741e-06	0.000798763	0.000784286	ITGA6/BAG3/ANK3/FLNB/CDK5R1/BZW2/DOCK9/EIF3E/ACVR1/SNX9/EIF2A/PAICS/RPL34/RPS2/RSL1D1/RPL24/EEF1G/DNAJB1/RPL14/RPL29/FXYD5/MPP7/RACK1/RPS26/ATIC/RPL23A/STAT1/SPTBN1/RPL7A/HSPA5/EEF2/ZC3HAV1/CBL/HSPA8/EIF2S3/RPL15/NOP56/SERBP1/CAPZB/EEF1D/HSP90AB1	41
celltypes.CD4 T cell.up	celltypes	CD4 T cell	up	MF	GO:0005164	tumor necrosis factor receptor binding	10/915	31/14933	0.322581	5.26459	6.07242	9.65462e-06	0.000933602	0.000916681	CD40LG/TNFSF13B/LTA/LTB/TRAP1/TNFSF8/TNFSF10/TRAF1/STAT1/CASP8	10
celltypes.CD4 T cell.up	celltypes	CD4 T cell	up	MF	GO:0043022	ribosome binding	18/915	110/14933	0.163636	2.67058	4.49285	0.000118434	0.00954382	0.00937085	EIF2A/NPM1/HABP4/C1QBP/RPSA/MTRFR/RACK1/NAA16/SBDS/EIF3K/ABCE1/GTPBP6/HSPA5/EEF2/LETMD1/SERBP1/EIF4B/EIF1	18
celltypes.CD4 T cell.up	celltypes	CD4 T cell	up	MF	GO:0051082	unfolded protein binding	16/915	106/14933	0.150943	2.46343	3.863	0.000703022	0.0453215	0.0445001	GRPEL2/DNAJA4/TRAP1/NPM1/DNAJB1/NACA/HSP90B1/TOMM20/CALR/HSPA5/PFDN5/HSPA8/HSPD1/PPIA/NAP1L4/HSP90AB1	16
celltypes.CD4 T cell.up	celltypes	CD4 T cell	up	MF	GO:0001784	phosphotyrosine residue binding	9/915	46/14933	0.195652	3.19309	3.8059	0.00165361	0.0940612	0.0923564	SOCS3/LDLRAP1/GRAP/IRS1/LCK/NCK2/GRAP2/CBL/ZAP70	9
celltypes.CD4 T cell.up	celltypes	CD4 T cell	up	MF	GO:0031625	ubiquitin protein ligase binding	31/915	290/14933	0.106897	1.74458	3.27129	0.00180341	0.0968833	0.0951273	FHIT/STING1/UBASH3B/APBB1/AXIN2/TRIB2/IKBKE/SNX9/SPART/RPL11/CASP10/FOXO1/RPS27A/TRAF1/RPL5/PATZ1/RPL23/CALR/HSPA5/ARRB2/UBA52/HSPA8/HSPD1/FAU/LRPPRC/RALA/CASP8/PCBP2/CAMLG/CACYBP/HSP90AB1	31
celltypes.CD4 T cell.up	celltypes	CD4 T cell	up	MF	GO:0051087	protein-folding chaperone binding	16/915	128/14933	0.125	2.04003	3.01906	0.00507946	0.223265	0.219219	BAG3/SGTB/GRPEL2/DNAJA4/APP/TIMM9/DNAJB1/RPS3/ATP1A1/SOD1/CALR/HSPA5/ST13/HSPA8/HSPD1/ERP29	16
celltypes.B cell.down	celltypes	B cell	down	BP	GO:0002181	cytoplasmic translation	61/1232	164/14457	0.371951	4.36469	13.2263	1.72687e-24	9.11097e-21	7.9945e-21	RPL17/RPS10/RPL12/RPS16/RPL19/RPL26/UBA52/RPS18/RPL23A/RPS6/RPL11/EIF4A1/RPS13/RPL10A/RPL37/RPS27/RPL29/RPS15/RPL13A/RPS21/CSDE1/RPL9/RPL36A/RPS12/RPS2/RPL27/RPL10/PABPC1/RPL22/RPL4/RPL7/EIF3G/RPS28/RPS27A/RPL32/RPL13/RPL3/RPL27A/RPL36/RPL21/RPL31/RPS29/RPL24/RPL34/RPL14/RPL38/RPS25/RPS3A/EIF3E/RPS4X/RPL30/EIF3K/RPS24/RPS14/RPL35A/RPS15A/RPS3/RPS26/EIF3M/RWDD1/NCK1	61
celltypes.B cell.down	celltypes	B cell	down	BP	GO:0002250	adaptive immune response	93/1232	415/14457	0.224096	2.62968	10.2812	1.40957e-18	3.71845e-15	3.26278e-15	JAK1/HLA-C/CD46/HLA-F/B2M/HLA-E/RIF1/HLA-A/STAT3/ARID5A/SAMSN1/TGFB1/RNF168/PIK3CD/FADD/BTN3A3/NOTCH1/KLHL22/IL23A/LAX1/CD84/ADCY7/SMAD7/PTPRC/ERAP1/UNC13D/BTN3A2/LGALS1/JAK3/BTN3A1/RAB27A/IL17RA/LTA/IL27RA/CD27/STAT4/NDFIP1/SKAP1/PAG1/BATF/TNFAIP3/PRDM1/IL6ST/RNF125/CTSC/FYN/OTUD7B/FCER1G/LIME1/TNFSF13B/CD6/RORA/IL6R/LAT/IL7R/TBX21/ITK/CAMK4/TXK/ZAP70/CD3E/CD8B/SPN/LEF1/CD247/KLRK1/THEMIS/KLRC2/…	93
celltypes.B cell.down	celltypes	B cell	down	BP	GO:0050852	T cell receptor signaling pathway	46/1232	138/14457	0.333333	3.91153	10.489	1.29374e-16	2.27526e-13	1.99645e-13	WNK1/HLA-A/RPS3/PIK3CD/BTN3A3/NCK1/CYLD/GBP1/PTPN22/PTPRC/PDE4D/BTN3A2/BTN3A1/LGALS3/PVRIG/FOSL2/SKAP1/DGKZ/PLCG1/PTPRJ/TESPA1/FYN/LIME1/LCK/LAT/ITK/TXK/ZAP70/LCP2/CD300A/CD3E/CD8B/FYB1/CD247/THEMIS/CD3G/CD3D/CD226/ZNF683/SH2D1A/UBASH3A/CD28/CD8A/TRAT1/SLA2/GATA3	46
celltypes.B cell.down	celltypes	B cell	down	BP	GO:0030098	lymphocyte differentiation	86/1232	399/14457	0.215539	2.52926	9.45446	3.61044e-16	4.76217e-13	4.17861e-13	RPS6/JAK1/CD46/RPL22/B2M/IRF2BP2/IL2RG/SOD1/STAT3/RBPJ/KLF6/ITGA4/ITPKB/TGFB1/PIK3CD/PRDX2/RUNX3/PHF10/FADD/ZC3H8/PIK3R1/IL23A/ATM/CYLD/SMAD7/PTPN22/PTPRC/STAT5B/ST3GAL1/LRRC8A/LGALS1/JAK3/VSIR/ITGB1/MFNG/IKZF1/XBP1/PTGER4/CD27/STAT4/NDFIP1/DOCK10/FOSL2/FLT3LG/PTPRJ/BATF/PRDM1/IL6ST/RASGRP1/ITM2A/TESPA1/FCER1G/TNFSF8/RUNX2/LCK/TNFSF13B/RORA/IL6R/TCF7/IL7R/TBX21/ITK/CAMK4/BCL11B/ZAP70/TOX/CD3E/SPN…	86
celltypes.B cell.down	celltypes	B cell	down	BP	GO:0007159	leukocyte cell-cell adhesion	81/1232	376/14457	0.215426	2.52793	9.16245	2.79547e-15	2.6758e-12	2.3479e-12	CD44/CD46/NCK2/B2M/WNK1/HLA-E/IL2RG/HLA-A/ITGA4/SELL/RPS3/ITPKB/TGFB1/PRDX2/RAC2/RUNX3/PHF10/FADD/ZC3H8/NCK1/KLHL22/IL23A/LAX1/STK10/CYLD/SMAD7/ITGB7/PTPN22/PTPRC/STAT5B/LGALS1/JAK3/VSIR/RASAL3/TNFAIP8L2/ITGB1/ETS1/XBP1/LGALS3/SEMA4D/CD27/ITGAL/NDFIP1/SKAP1/PAG1/IL6ST/ITGB2/ITGA5/RASGRP1/TESPA1/FYN/ADTRP/CD5/LCK/TNFSF13B/CD6/YES1/IL7R/TBX21/ZAP70/CD300A/CD3E/AIF1/SPN/SELPLG/LEF1/KLRK1/TMIGD2/CCL5…	81
celltypes.B cell.down	celltypes	B cell	down	BP	GO:0046631	alpha-beta T cell activation	52/1232	184/14457	0.282609	3.31629	9.65109	3.41039e-15	2.6758e-12	2.3479e-12	JAK1/RPL22/HLA-E/IL2RG/HLA-A/STAT3/ITPKB/RUNX3/PIK3R1/IL23A/SMAD7/CLEC2B/PTPRC/LGALS1/JAK3/VSIR/RASAL3/LGALS3/PTGER4/STAT4/NDFIP1/FOSL2/BATF/PRDM1/IL6ST/TNFSF8/RORA/IL6R/TBX21/ITK/BCL11B/ZAP70/TOX/CD300A/CD3E/SPN/LEF1/CD247/CD3G/CD3D/ZNF683/NKG7/CD28/CTSL/PRKCQ/KLRF1/IL18R1/ANXA1/EOMES/CRTAM/GATA3/ICOS	52
celltypes.B cell.down	celltypes	B cell	down	BP	GO:0051249	regulation of lymphocyte activation	91/1232	465/14457	0.195699	2.29644	8.67305	2.47885e-14	1.45316e-11	1.27508e-11	CD46/NCK2/B2M/TBC1D10C/HLA-E/IL2RG/RIF1/HLA-A/SOD1/RPS3/SAMSN1/ITPKB/TGFB1/PRDX2/RAC2/RUNX3/PHF10/FADD/PIBF1/ZC3H8/NCK1/KLHL22/IL23A/LAX1/ATM/CD320/CYLD/SMAD7/PTPN22/PTPRC/STAT5B/RASSF5/LGALS1/JAK3/VSIR/NFATC2/RASAL3/TNFAIP8L2/IL27RA/XBP1/LGALS3/CD27/NDFIP1/PAG1/BATF/TNFAIP3/PRDM1/IL6ST/RASGRP1/TESPA1/FYN/TNFSF8/CD5/LCK/TNFSF13B/CD6/LAT/YES1/TCF7/IL7R/TBX21/CAMK4/ZAP70/TOX/CD300A/CD3E/AIF1/SPN/LE…	91
celltypes.B cell.down	celltypes	B cell	down	BP	GO:1903037	regulation of leukocyte cell-cell adhesion	71/1232	344/14457	0.206395	2.42196	8.14684	1.38263e-12	6.07896e-10	5.33404e-10	CD44/CD46/NCK2/B2M/WNK1/HLA-E/IL2RG/HLA-A/ITGA4/RPS3/ITPKB/TGFB1/PRDX2/RUNX3/PHF10/FADD/ZC3H8/NCK1/KLHL22/IL23A/LAX1/CYLD/SMAD7/PTPN22/PTPRC/STAT5B/LGALS1/JAK3/VSIR/RASAL3/TNFAIP8L2/ETS1/XBP1/LGALS3/CD27/NDFIP1/SKAP1/PAG1/IL6ST/ITGB2/RASGRP1/TESPA1/FYN/ADTRP/CD5/LCK/TNFSF13B/CD6/YES1/IL7R/TBX21/ZAP70/CD300A/CD3E/AIF1/SPN/LEF1/KLRK1/TMIGD2/CCL5/DPP4/CD28/PRKCQ/ANXA1/CD4/CRTAM/TNFSF14/TIGIT/GATA3/I…	71
celltypes.B cell.down	celltypes	B cell	down	BP	GO:0002443	leukocyte mediated immunity	72/1232	360/14457	0.2	2.34692	7.89878	4.70606e-12	1.70875e-09	1.49936e-09	HLA-C/CD46/VAMP2/HLA-F/B2M/WDR1/HLA-E/RIF1/HLA-A/ARID5A/TGFB1/RNF168/PIK3CD/RAC2/FADD/BTN3A3/PIK3R1/KLHL22/IL23A/CD84/SMAD7/PTPRC/STAT5B/UNC13D/BTN3A2/ARRB2/JAK3/RAB27A/LTA/IL27RA/CD27/NDFIP1/BATF/ITGB2/STXBP1/CTSC/RASGRP1/FCER1G/IL6R/LAT/IL7R/TBX21/CD96/CD300A/SPN/KLRK1/KLRC2/GZMM/CD226/SH2D1A/NKG7/SH2D1B/CD28/KLRD1/IL18R1/CD2/CX3CR1/CD8A/PRF1/HCST/CRTAM/SLA2/CD7/TIGIT/KLRB1/GATA3/KLRC3/GZMB/IL2…	72
celltypes.B cell.down	celltypes	B cell	down	BP	GO:0001906	cell killing	46/1232	181/14457	0.254144	2.98227	8.19087	8.43253e-12	2.78063e-09	2.43989e-09	HLA-C/HLA-F/B2M/HLA-E/HLA-A/RPL30/TGFB1/FADD/PIK3R1/IL23A/GBP2/GBP1/PTPRC/STAT5B/GBP5/UNC13D/ARRB2/APOL1/RAB27A/LGALS3/GBP3/NINJ1/CTSC/RASGRP1/IL7R/KLRK1/KLRC2/GZMM/CD226/SH2D1A/NKG7/KLRD1/CD2/CX3CR1/PRF1/HCST/CRTAM/GZMH/TIGIT/KLRB1/KLRC3/GNLY/GZMB/GZMA/TYROBP/FCGR3A	46
celltypes.B cell.down	celltypes	B cell	down	BP	GO:0002366	leukocyte activation involved in immune response	59/1232	276/14457	0.213768	2.50848	7.72275	2.52996e-11	6.67403e-09	5.85619e-09	RPS6/JAK1/CD46/VAMP2/HLA-F/RIF1/STAT3/TGFB1/RNF168/PIK3CD/RAC2/PIK3R1/IL23A/CD84/SMAD7/PTPRC/ST3GAL1/SBNO2/UNC13D/LGALS1/JAK3/RAB27A/MFNG/IL27RA/XBP1/LGALS3/PTGER4/ITGAL/STAT4/NDFIP1/DOCK10/BATF/IL6ST/ITGB2/STXBP1/RASGRP1/ITM2A/FCER1G/RORA/IL6R/LAT/TBX21/CD300A/SPN/LEF1/KLRC2/ZNF683/NKG7/SH2D1B/CD28/IL18R1/ANXA1/EOMES/CX3CR1/GATA3/ICOS/TYROBP/CD40LG/FCGR3A	59
celltypes.B cell.down	celltypes	B cell	down	BP	GO:0030101	natural killer cell activation	27/1232	79/14457	0.341772	4.01055	8.18921	1.33444e-10	2.6203e-08	2.29921e-08	HLA-F/CD48/HLA-E/PIK3CD/PIBF1/IL23A/CASP8/PTPN22/PTPRC/STAT5B/UNC13D/RAB27A/PRDM1/RASGRP1/FYN/TOX/KLRK1/KLRC2/ZNF683/SH2D1A/NKG7/KLRD1/IL18R1/CD2/KLRC3/TYROBP/FCGR3A	27
celltypes.B cell.down	celltypes	B cell	down	BP	GO:0001819	positive regulation of cytokine production	77/1232	437/14457	0.176201	2.06765	6.91714	5.14414e-10	9.04682e-08	7.93821e-08	DDX3X/CD46/HLA-F/B2M/IL16/HLA-E/HLA-A/SOD1/STAT3/CARD8/GPSM3/ARID5A/MBP/RPS3/ZC3HAV1/SORL1/TGFB1/PIK3CD/NLRP1/FADD/PIBF1/RIPK1/LTB/PIK3R1/IL23A/HK1/CASP8/TRAF3IP3/PTPN22/PTPRC/STAT5B/PDE4D/GBP5/BTN3A2/BTN3A1/IL17RA/LTA/IL27RA/TRIM32/HEG1/XBP1/PTGER4/PTPRJ/BATF/IL6ST/IKBKE/FCER1G/CD6/RORA/IL6R/PLCB1/TBX21/ITK/TXK/CD3E/AIF1/SPN/KLRK1/TMIGD2/RGCC/CD226/F2R/CD28/PRKCQ/STING1/IL18R1/ANXA1/CD4/CD2/IL32…	77
celltypes.B cell.down	celltypes	B cell	down	BP	GO:0001909	leukocyte mediated cytotoxicity	35/1232	132/14457	0.265152	3.11144	7.4379	7.65395e-10	1.30265e-07	1.14302e-07	HLA-C/HLA-F/B2M/HLA-E/HLA-A/TGFB1/FADD/PIK3R1/IL23A/PTPRC/STAT5B/UNC13D/ARRB2/RAB27A/CTSC/RASGRP1/IL7R/KLRK1/KLRC2/GZMM/CD226/SH2D1A/NKG7/KLRD1/CD2/CX3CR1/PRF1/HCST/CRTAM/TIGIT/KLRB1/KLRC3/GZMB/TYROBP/FCGR3A	35
celltypes.B cell.down	celltypes	B cell	down	BP	GO:0050900	leukocyte migration	62/1232	323/14457	0.19195	2.25246	6.94806	8.37404e-10	1.38067e-07	1.21148e-07	RPL13A/WNK1/WDR1/IL16/GPSM3/ITGA4/SELL/CALR/TGFB1/PIK3CD/RAC2/PPIB/FADD/PIK3R1/IL23A/STK10/CD99/SBDS/ITGB7/STAT5B/CKLF/SLC8B1/ITGB1/IL17RA/IL27RA/LGALS3/PTGER4/ITGAL/STK39/PTPRJ/NINJ1/ITGB2/FYN/ADTRP/FCER1G/LCK/MMP28/MTUS1/CCL4/IL6R/ITGA6/PLCB1/YES1/ITGA1/TBX21/ZAP70/CD300A/JAML/AIF1/SPN/SELPLG/KLRK1/CCR5/CCL5/CXCR3/DPP4/GPR15/ANXA1/CX3CR1/CRTAM/TNFSF14/GATA3	62
celltypes.B cell.down	celltypes	B cell	down	BP	GO:0050870	positive regulation of T cell activation	50/1232	236/14457	0.211864	2.48614	7.02558	1.16767e-09	1.86686e-07	1.6381e-07	CD46/NCK2/B2M/HLA-E/IL2RG/HLA-A/RPS3/ITPKB/TGFB1/RUNX3/PHF10/FADD/NCK1/KLHL22/IL23A/CYLD/PTPRC/STAT5B/LGALS1/VSIR/RASAL3/XBP1/CD27/IL6ST/RASGRP1/TESPA1/FYN/CD5/LCK/TNFSF13B/CD6/YES1/IL7R/ZAP70/CD3E/AIF1/SPN/LEF1/KLRK1/TMIGD2/CCL5/DPP4/CD28/PRKCQ/ANXA1/CD4/TNFSF14/GATA3/ICOS/CD40LG	50
celltypes.B cell.down	celltypes	B cell	down	BP	GO:0002228	natural killer cell mediated immunity	26/1232	84/14457	0.309524	3.63213	7.38423	3.33328e-09	5.02469e-07	4.40896e-07	HLA-F/HLA-E/HLA-A/TGFB1/PIK3R1/STAT5B/UNC13D/ARRB2/RAB27A/RASGRP1/CD96/KLRK1/KLRC2/CD226/SH2D1A/NKG7/SH2D1B/KLRD1/CD2/HCST/CRTAM/TIGIT/KLRB1/KLRC3/GZMB/FCGR3A	26
celltypes.B cell.down	celltypes	B cell	down	BP	GO:0043122	regulation of canonical NF-kappaB signal transduction	52/1232	267/14457	0.194757	2.28539	6.47038	1.16912e-08	1.58162e-06	1.3878e-06	TERF2IP/TMC8/STAT3/CARD8/TAB2/FLNA/UBE2V1/MIER1/ZC3HAV1/TGFB1/MAP3K3/BIRC2/FADD/ZMYND11/GOLT1B/RIPK1/LTB/TMSB4X/CFLAR/TRADD/CYLD/CASP8/SLC20A1/APOL3/LIMS1/LITAF/TNFSF10/ARRB2/LGALS1/USP20/LTA/TRIM32/NDFIP1/S100A4/OPTN/CARD19/NLRC3/TNFAIP3/IKBKE/TRAF1/OTUD7B/LIME1/RORA/TNFRSF1A/F2R/S100B/CD4/CX3CR1/TNFSF14/TGFBR3/CD40LG/FASLG	52
celltypes.B cell.down	celltypes	B cell	down	BP	GO:0002703	regulation of leukocyte mediated immunity	47/1232	231/14457	0.203463	2.38755	6.48853	1.42538e-08	1.88008e-06	1.64969e-06	HLA-C/CD46/HLA-F/B2M/HLA-E/RIF1/HLA-A/ARID5A/TGFB1/RAC2/FADD/KLHL22/IL23A/CD84/SMAD7/PTPRC/STAT5B/UNC13D/ARRB2/JAK3/LTA/IL27RA/NDFIP1/ITGB2/STXBP1/RASGRP1/IL7R/TBX21/CD96/CD300A/SPN/KLRK1/KLRC2/CD226/SH2D1A/SH2D1B/CD28/KLRD1/IL18R1/CX3CR1/CRTAM/CD7/TIGIT/KLRB1/GATA3/KLRC3/TYROBP	47
celltypes.B cell.down	celltypes	B cell	down	BP	GO:0002683	negative regulation of immune system process	77/1232	471/14457	0.163482	1.91839	6.18477	1.63148e-08	2.09943e-06	1.84217e-06	ERBIN/CD46/HLA-F/FBXW7/TBC1D10C/PIM1/HLA-E/HLA-A/CARD8/SAMSN1/TGFB1/PRDX2/RUNX3/FADD/PIBF1/ZC3H8/NCK1/PIK3R1/HSPA8/LAX1/CD84/ATM/OGT/GBP1/PPT1/SMAD7/PTPN22/PTPRC/RASSF5/ZDHHC18/ARRB2/LGALS1/JAK3/VSIR/TNFAIP8L2/IL27RA/TRIM32/LGALS3/PTGER4/PVRIG/NDFIP1/LYAR/DGKZ/NLRC3/PLCG1/PAG1/PTPRJ/MYC/TNFAIP3/RNF125/SAMHD1/FYN/ADTRP/MMP28/PLCB1/YES1/IL7R/TBX21/LDLR/CD96/CD300A/SPN/KLRK1/UBASH3B/DPP4/SH2D1A/UBAS…	77
celltypes.B cell.down	celltypes	B cell	down	BP	GO:0031349	positive regulation of defense response	75/1232	456/14457	0.164474	1.93003	6.1593	1.93576e-08	2.43169e-06	2.13371e-06	ERBIN/DDX3X/HLA-F/IL16/HLA-E/CARD8/GPSM3/ZC3HAV1/CPT1A/TGFB1/BIRC2/NLRP1/FADD/RPS6KA3/RIPK1/ZNFX1/ZDHHC3/PDCD4/PIK3R1/IL23A/GBP2/HSPA8/OGT/TRADD/CYLD/GBP1/PPT1/TRAF3IP3/PTPN22/STAT5B/ZDHHC18/CASP6/GBP5/ARRB2/LGALS1/CAMK2N1/ETS1/IL17RA/LTA/TRIM32/KCNK6/PTGER4/GBP3/OPTN/NLRC3/TNFAIP3/IL6ST/NINJ1/RNF125/IKBKE/CTSC/RASGRP1/MAP2K6/FYN/TXK/LDLR/CD300A/RNF144A/KLRK1/KLRC2/TNFRSF1A/CCL5/CD226/SH2D1A/NKG7…	75
celltypes.B cell.down	celltypes	B cell	down	BP	GO:0043065	positive regulation of apoptotic process	77/1232	493/14457	0.156187	1.83278	5.74226	1.17577e-07	1.31986e-05	1.15812e-05	RPL26/STK4/RPS6/TXNIP/REST/DDX3X/TLE5/NCK2/FBXW7/SERINC3/TMC8/SOD1/NCOA1/ITGA4/RRP1B/RPS3/ARL6IP5/TGFB1/STK17A/PIK3CD/FADD/ZC3H8/FAM162A/RIPK1/LTB/PDCD4/NOTCH1/NCK1/JMY/CFLAR/ATM/BIN1/TRADD/CYLD/CASP8/MCL1/PTPRC/CASP6/TNFSF10/LGALS1/ITGB1/SMPD1/LTA/CALHM2/CTSD/NET1/E2F3/XBP1/PRKCI/APBB1/CAPN2/PRMT2/BBC3/NHERF1/BNIP3/PLCG1/PLEKHF1/FAS/MYC/CTSC/MAP2K6/CDK5R1/LCK/ITGA6/ITGA1/RGCC/TNFRSF1A/CCL5/F2R/C…	77
celltypes.B cell.down	celltypes	B cell	down	BP	GO:0046651	lymphocyte proliferation	49/1232	264/14457	0.185606	2.17801	5.89583	1.47685e-07	1.55837e-05	1.36741e-05	RPS6/CD46/NCK2/HLA-E/HLA-A/RPS3/TGFB1/PRDX2/RAC2/FADD/NCK1/IL23A/ATM/CD320/PTPN22/PTPRC/STAT5B/RASSF5/BTN3A1/VSIR/NFATC2/RASAL3/CCND3/LGALS3/NDFIP1/FOSL2/IL6ST/RASGRP1/FYN/TNFSF8/TNFSF13B/CD6/IL7R/ZAP70/CD300A/CD3E/AIF1/SPN/LEF1/TMIGD2/CCL5/CD28/PRKCQ/ANXA1/CRTAM/TNFSF14/TYROBP/CD40LG/FCGR3A	49
celltypes.B cell.down	celltypes	B cell	down	BP	GO:0001910	regulation of leukocyte mediated cytotoxicity	24/1232	90/14457	0.266667	3.12922	6.1843	3.115e-07	3.10089e-05	2.72091e-05	HLA-C/HLA-F/B2M/HLA-E/HLA-A/TGFB1/FADD/IL23A/PTPRC/STAT5B/ARRB2/RASGRP1/IL7R/KLRK1/KLRC2/CD226/SH2D1A/KLRD1/CX3CR1/CRTAM/TIGIT/KLRB1/KLRC3/TYROBP	24
celltypes.B cell.down	celltypes	B cell	down	BP	GO:0032943	mononuclear cell proliferation	49/1232	271/14457	0.180812	2.12175	5.68961	3.36884e-07	3.29148e-05	2.88814e-05	RPS6/CD46/NCK2/HLA-E/HLA-A/RPS3/TGFB1/PRDX2/RAC2/FADD/NCK1/IL23A/ATM/CD320/PTPN22/PTPRC/STAT5B/RASSF5/BTN3A1/VSIR/NFATC2/RASAL3/CCND3/LGALS3/NDFIP1/FOSL2/IL6ST/RASGRP1/FYN/TNFSF8/TNFSF13B/CD6/IL7R/ZAP70/CD300A/CD3E/AIF1/SPN/LEF1/TMIGD2/CCL5/CD28/PRKCQ/ANXA1/CRTAM/TNFSF14/TYROBP/CD40LG/FCGR3A	49
celltypes.B cell.down	celltypes	B cell	down	BP	GO:0070672	response to interleukin-15	8/1232	11/14457	0.727273	8.53424	7.62945	3.55468e-07	3.40991e-05	2.99205e-05	JAK1/IL2RG/STAT3/STAT5B/JAK3/PLCB1/CD4/IL2RB	8
celltypes.B cell.down	celltypes	B cell	down	BP	GO:0045580	regulation of T cell differentiation	36/1232	173/14457	0.208092	2.44188	5.82315	3.88726e-07	3.66235e-05	3.21356e-05	CD46/IL2RG/SOD1/ITPKB/TGFB1/PRDX2/RUNX3/PHF10/ZC3H8/IL23A/CYLD/SMAD7/PTPRC/STAT5B/LGALS1/JAK3/VSIR/XBP1/CD27/BATF/PRDM1/RASGRP1/TESPA1/TCF7/IL7R/TBX21/CAMK4/ZAP70/TOX/LEF1/ZNF683/CD28/ANXA1/CD2/CRTAM/GATA3	36
celltypes.B cell.down	celltypes	B cell	down	BP	GO:0031341	regulation of cell killing	25/1232	98/14457	0.255102	2.99351	6.04369	4.46657e-07	4.06304e-05	3.56515e-05	HLA-C/HLA-F/B2M/HLA-E/HLA-A/TGFB1/FADD/IL23A/PTPRC/STAT5B/ARRB2/RASGRP1/IL7R/KLRK1/KLRC2/CD226/SH2D1A/KLRD1/CX3CR1/PRF1/CRTAM/TIGIT/KLRB1/KLRC3/TYROBP	25
celltypes.B cell.down	celltypes	B cell	down	BP	GO:0002715	regulation of natural killer cell mediated immunity	18/1232	56/14457	0.321429	3.77183	6.34301	4.59691e-07	4.11073e-05	3.607e-05	HLA-F/HLA-E/HLA-A/TGFB1/STAT5B/ARRB2/RASGRP1/CD96/KLRK1/KLRC2/CD226/SH2D1A/SH2D1B/KLRD1/CRTAM/TIGIT/KLRB1/KLRC3	18
celltypes.B cell.down	celltypes	B cell	down	BP	GO:0097193	intrinsic apoptotic signaling pathway	52/1232	298/14457	0.174497	2.04764	5.57747	4.69502e-07	4.12848e-05	3.62258e-05	RPL26/DDX5/CD44/DDX3X/NCK2/FBXW7/HINT1/TPT1/USP47/P4HB/SERINC3/SOD1/CARD8/URI1/RPS3/ARL6IP5/HIPK2/NLRP1/HIPK1/PPP2R5C/IVNS1ABP/HYOU1/NCK1/PIK3R1/JMY/PDK1/ATM/PTTG1IP/CDIP1/CYLD/DYRK2/MCL1/IFI6/ERO1A/CASP6/TRIM32/XBP1/BBC3/NHERF1/BNIP3/PLEKHF1/MYC/ERN1/IER3/IKBKE/RTKN2/FYN/LCK/TNFRSF1A/FNIP2/FHIT/NACC2	52
celltypes.B cell.down	celltypes	B cell	down	BP	GO:0002819	regulation of adaptive immune response	38/1232	196/14457	0.193878	2.27507	5.48554	1.20655e-06	9.2257e-05	8.09517e-05	HLA-C/CD46/HLA-F/B2M/HLA-E/RIF1/HLA-A/ARID5A/SAMSN1/TGFB1/FADD/KLHL22/IL23A/ADCY7/SMAD7/PTPRC/LGALS1/JAK3/LTA/IL27RA/NDFIP1/SKAP1/BATF/TNFAIP3/IL6ST/TNFSF13B/IL7R/TBX21/SPN/CD226/CD28/PRKCQ/KLRD1/IL18R1/ANXA1/CD4/CD7/GATA3	38
celltypes.B cell.down	celltypes	B cell	down	BP	GO:0048872	homeostasis of number of cells	52/1232	309/14457	0.168285	1.97475	5.28636	1.46569e-06	0.000107403	9.42414e-05	RPS6/VPS13A/B2M/SOD1/STAT3/SMAP1/RPS24/RPS14/HIPK2/ITPKB/TGFB1/PIK3CD/KLF13/PRDX2/RAC2/TMOD3/FADD/ZC3H8/NOTCH1/CYLD/STAT5B/JAK3/ETS1/SELENOW/BPGM/KCNQ1/IKZF1/THRA/GPR174/OCIAD2/CITED2/DOCK10/FOSL2/FAM210B/LYAR/SFXN1/FAS/TNFAIP3/SLC40A1/TNFSF13B/LAT/IL7R/F2R/ANXA1/CX3CR1/GCNT4/TNFSF14/ADGRG1/GATA3/ID2/TGFBR3/CCR4	52
celltypes.B cell.down	celltypes	B cell	down	BP	GO:0001818	negative regulation of cytokine production	46/1232	264/14457	0.174242	2.04466	5.22844	2.22355e-06	0.000143573	0.00012598	ERBIN/HLA-F/RNF216/CARD8/TGFB1/N4BP1/PIBF1/RPS6KA5/PDCD4/KLHL22/IL23A/CD84/ADCY7/CYLD/GBP1/SMAD7/PTPN22/PTPRC/ARRB2/JAK3/VSIR/TRIB2/IL27RA/NDRG2/GPR174/PTGER4/NDFIP1/NLRC3/SRGN/SIGIRR/TNFAIP3/RNF125/OTUD7B/ABCD2/IL6R/ARRB1/TBX21/CD96/LEF1/RGCC/ZNF683/ANXA1/CX3CR1/TIGIT/GATA3/TYROBP	46
celltypes.B cell.down	celltypes	B cell	down	BP	GO:0060326	cell chemotaxis	43/1232	241/14457	0.178423	2.09372	5.22586	2.50709e-06	0.000159366	0.000139837	RPL13A/WNK1/IL16/GPSM3/CALR/PIK3CD/RAC2/PPIB/NOTCH1/IL23A/ELMO2/TMSB4X/SBDS/CKLF/SLC8B1/ARRB2/IL17RA/LGALS3/STK39/PTPRJ/NINJ1/ITGB2/BIN2/FCER1G/TIAM1/MMP28/MTUS1/CCL4/IL6R/ITGA1/JAML/AIF1/LEF1/KLRK1/CCR5/CCL5/CXCR3/DPP4/PRKCQ/ANXA1/CX3CR1/TNFSF14/CCR4	43
celltypes.B cell.down	celltypes	B cell	down	BP	GO:0016032	viral process	60/1232	384/14457	0.15625	1.83353	5.0527	2.92253e-06	0.00017553	0.00015402	DDX5/NUCKS1/EEF1A1/REST/DDX3X/CSDE1/DDX6/CD46/CANX/PABPC1/EIF3G/P4HB/MGAT1/KPNA3/RRP1B/ZC3HAV1/PPIB/N4BP1/CHMP3/CTSB/NMT2/ZNFX1/NOTCH1/SPCS3/CHMP7/TMEM41B/TMEM250/ITGB7/ST3GAL1/NPC1/LGALS1/ITGB1/SMPD1/TRIM32/SLC20A2/TRIM14/WWP1/STOM/RAB43/ITGA5/CTBP2/MGAT4A/NECTIN3/IFITM1/CCL4/LDLR/NFIA/SELPLG/LEF1/CCR5/CCL5/DPP4/PCSK5/GPR15/CD28/CTSL/OASL/CD4/IL32/NCAM1	60
celltypes.B cell.down	celltypes	B cell	down	BP	GO:2001233	regulation of apoptotic signaling pathway	56/1232	350/14457	0.16	1.87753	5.07238	2.97967e-06	0.00017553	0.00015402	RPL26/STK4/CD44/DDX3X/NCK2/FBXW7/TPT1/USP47/P4HB/SERINC3/TMC8/SOD1/URI1/RPS3/PRDX2/FADD/ZMYND11/MAZ/RIPK1/IVNS1ABP/LTB/HYOU1/NCK1/CFLAR/PTTG1IP/CYLD/MCL1/IFI6/PTPRC/RFFL/TNFSF10/FXN/LTA/TRIM32/XBP1/LGALS3/BBC3/NHERF1/PLEKHF1/FAS/MYC/TNFAIP3/IER3/TRAF1/CTSC/RTKN2/FYN/LCK/ITGA6/NOG/MAL/NACC2/CX3CR1/TNFSF14/CD40LG/FASLG	56
celltypes.B cell.down	celltypes	B cell	down	BP	GO:0035723	interleukin-15-mediated signaling pathway	7/1232	10/14457	0.7	8.2142	6.96516	3.06079e-06	0.00017553	0.00015402	JAK1/IL2RG/STAT3/JAK3/PLCB1/CD4/IL2RB	7
celltypes.B cell.down	celltypes	B cell	down	BP	GO:0051651	maintenance of location in cell	35/1232	183/14457	0.191257	2.24432	5.1703	4.33598e-06	0.000235842	0.000206942	SKP1/VPS13A/GSTO1/FLNA/ARL2BP/CALR/SORL1/TGFB1/HSP90B1/CALM3/DIAPH1/CALM1/HK1/PTPRC/ERO1A/HSPA5/PDE4D/SLC8B1/SELENON/SUN2/SYNE1/PLCG1/SRGN/ARHGAP21/ANK3/LIME1/LCK/PLCB1/PLCL1/CCR5/F2R/UBASH3B/CXCR3/CD4/FASLG	35
celltypes.B cell.down	celltypes	B cell	down	BP	GO:0032944	regulation of mononuclear cell proliferation	39/1232	215/14457	0.181395	2.1286	5.08867	4.82594e-06	0.000258639	0.000226945	CD46/NCK2/HLA-E/HLA-A/RPS3/TGFB1/RAC2/FADD/NCK1/IL23A/ATM/CD320/PTPN22/PTPRC/STAT5B/RASSF5/VSIR/NFATC2/RASAL3/LGALS3/NDFIP1/IL6ST/TNFSF8/TNFSF13B/CD6/ZAP70/CD300A/CD3E/AIF1/SPN/TMIGD2/CCL5/CD28/PRKCQ/ANXA1/CRTAM/TYROBP/CD40LG/FCGR3A	39
celltypes.B cell.down	celltypes	B cell	down	BP	GO:0002456	T cell mediated immunity	26/1232	119/14457	0.218487	2.56386	5.22827	6.16843e-06	0.000322224	0.000282739	HLA-C/CD46/HLA-F/B2M/HLA-E/HLA-A/ARID5A/FADD/BTN3A3/KLHL22/IL23A/SMAD7/PTPRC/BTN3A2/RAB27A/CTSC/IL7R/TBX21/SPN/GZMM/KLRD1/IL18R1/CD8A/PRF1/CD7/GATA3	26
celltypes.B cell.down	celltypes	B cell	down	BP	GO:0034975	protein folding in endoplasmic reticulum	7/1232	11/14457	0.636364	7.46746	6.54919	7.7951e-06	0.000377311	0.000331075	CANX/P4HB/CALR/DNAJC3/HSP90B1/ERO1A/HSPA5	7
celltypes.B cell.down	celltypes	B cell	down	BP	GO:0070231	T cell apoptotic process	16/1232	55/14457	0.290909	3.4137	5.47374	8.55256e-06	0.000406516	0.000356701	RPS6/FADD/ZC3H8/RIPK1/ST3GAL1/JAK3/LGALS3/CD27/BBC3/FAS/IL7R/BCL11B/CCL5/GIMAP8/PRKCQ/FASLG	16
celltypes.B cell.down	celltypes	B cell	down	BP	GO:0031400	negative regulation of protein modification process	47/1232	289/14457	0.16263	1.90839	4.76101	1.18487e-05	0.000529776	0.000464857	RPL11/NPM1/WNK1/SNX6/TERF2IP/RPS3/SAMSN1/CDKN1B/DNAJC3/CALM3/N4BP1/PIBF1/IVNS1ABP/ATG14/PDCD4/NCK1/COPS9/CALM1/MVP/CRY1/OGT/CEP78/PTPN22/PTPRC/PKIA/RGS14/PDE4D/STK38/ARRB2/TRIB2/HEG1/NCOA7/DBNDD2/DUSP7/ZFYVE28/PTPRJ/TNFAIP3/ATP2B4/EPHA1/FYN/NIBAN1/ARRB1/CD300A/BEX3/PRKCH/GNAQ/PRR5L	47
celltypes.B cell.down	celltypes	B cell	down	BP	GO:0044092	negative regulation of molecular function	68/1232	477/14457	0.142558	1.67285	4.56098	1.61643e-05	0.000676849	0.000593907	RPL11/NPM1/ERBIN/TLE5/B2M/WNK1/PIM1/SNX6/TMC8/CARD8/GSTO1/FLNA/ITGA4/URI1/RRP1B/CDKN1B/CALM3/CAB39/HABP4/PDCD4/NOTCH1/CALM1/MVP/NOSIP/SERPINB6/MTRR/ARFGEF1/BIN1/CYLD/PTPN22/PTPRC/PKIA/RGS14/STK38/ARRB2/STYX/TCAF2/TRIB2/KCNQ1/HEG1/SPOCK2/NDFIP1/PRMT2/DBNDD2/STK39/NLRC3/DUSP7/ZFYVE28/PTPRJ/TNFAIP3/PTCH1/TIMP1/ATP2B4/EPHA1/ANK3/AKAP5/ARRB1/CD300A/LEF1/KLRK1/PRKCH/NOG/GNAQ/EOMES/GFI1/ID2/GZMA/CST7	68
celltypes.B cell.down	celltypes	B cell	down	BP	GO:0070670	response to interleukin-4	12/1232	35/14457	0.342857	4.02328	5.46552	1.82019e-05	0.00075026	0.000658322	JAK1/RPL3/IL2RG/KEAP1/PTPRC/STAT5B/HSPA5/JAK3/XBP1/TCF7/LEF1/GATA3	12
celltypes.B cell.down	celltypes	B cell	down	BP	GO:0033631	cell-cell adhesion mediated by integrin	8/1232	17/14457	0.470588	5.52215	5.694	3.28295e-05	0.00125513	0.00110133	WNK1/ITGA4/ITGB1/SKAP1/ITGA5/CD3E/CCL5/DPP4	8
celltypes.B cell.down	celltypes	B cell	down	BP	GO:0070232	regulation of T cell apoptotic process	12/1232	37/14457	0.324324	3.80581	5.21564	3.44223e-05	0.00130656	0.00114645	FADD/ZC3H8/ST3GAL1/JAK3/LGALS3/CD27/BBC3/IL7R/BCL11B/CCL5/GIMAP8/PRKCQ	12
celltypes.B cell.down	celltypes	B cell	down	BP	GO:0031640	killing of cells of another organism	15/1232	56/14457	0.267857	3.14319	4.90445	4.77765e-05	0.00176272	0.00154671	RPL30/GBP2/GBP1/GBP5/APOL1/LGALS3/GBP3/NINJ1/GZMM/NKG7/PRF1/GZMH/GNLY/GZMB/GZMA	15
celltypes.B cell.down	celltypes	B cell	down	BP	GO:0141061	disruption of cell in another organism	15/1232	56/14457	0.267857	3.14319	4.90445	4.77765e-05	0.00176272	0.00154671	RPL30/GBP2/GBP1/GBP5/APOL1/LGALS3/GBP3/NINJ1/GZMM/NKG7/PRF1/GZMH/GNLY/GZMB/GZMA	15
celltypes.B cell.down	celltypes	B cell	down	BP	GO:0006935	chemotaxis	53/1232	358/14457	0.148045	1.73724	4.31111	4.99531e-05	0.0018176	0.00159487	RPL13A/WNK1/IL16/GPSM3/CALR/TGFB1/PIK3CD/RAC2/PPIB/NOTCH1/IL23A/ELMO2/TMSB4X/PLGRKT/SBDS/CKLF/SLC8B1/ARRB2/IL17RA/LGALS3/SEMA4D/S100A4/STK39/PTPRJ/NINJ1/ITGB2/BIN2/FCER1G/TIAM1/SEMA4C/CMTM3/MMP28/MTUS1/CCL4/IL6R/ITGA1/ROBO3/JAML/AIF1/CMTM8/SPN/LEF1/KLRK1/CCR5/CCL5/CXCR3/DPP4/KIF21A/PRKCQ/ANXA1/CX3CR1/TNFSF14/CCR4	53
celltypes.B cell.down	celltypes	B cell	down	BP	GO:0002833	positive regulation of response to biotic stimulus	55/1232	376/14457	0.146277	1.71649	4.29656	5.07276e-05	0.00183314	0.00160851	ERBIN/DDX3X/HLA-F/HLA-E/CARD8/ZC3HAV1/CPT1A/BIRC2/NLRP1/FADD/RPS6KA3/ZNFX1/ZDHHC3/PIK3R1/KLHL22/GBP2/HSPA8/OGT/CYLD/PPT1/TRAF3IP3/PTPN22/STAT5B/ZDHHC18/CASP6/GBP5/ARRB2/TRIM32/KCNK6/NLRC3/TNFAIP3/NINJ1/RNF125/IKBKE/RASGRP1/MAP2K6/FYN/TXK/CD300A/RNF144A/KLRK1/PRKCA/KLRC2/CCL5/CD226/SH2D1A/SH2D1B/STING1/KLRD1/OASL/GFI1/CRTAM/PYHIN1/KLRC3/TYROBP	55
celltypes.B cell.down	celltypes	B cell	down	BP	GO:0070669	response to interleukin-2	6/1232	10/14457	0.6	7.04075	5.83221	5.88492e-05	0.00208381	0.00182846	JAK1/IL2RG/STAT3/STAT5B/JAK3/IL2RB	6
celltypes.B cell.down	celltypes	B cell	down	BP	GO:0031579	membrane raft organization	10/1232	28/14457	0.357143	4.19092	5.15832	6.12453e-05	0.00213438	0.00187283	ABCA7/MYADM/PPT1/CLN3/PTPRC/NPC1/S100A10/LAT/MAL/CD2	10
celltypes.B cell.down	celltypes	B cell	down	BP	GO:0002685	regulation of leukocyte migration	34/1232	198/14457	0.171717	2.01503	4.38933	6.1491e-05	0.00213438	0.00187283	WNK1/GPSM3/ITGA4/CALR/TGFB1/RAC2/FADD/PIK3R1/IL23A/STK10/CD99/SLC8B1/IL27RA/LGALS3/PTGER4/STK39/PTPRJ/NINJ1/ADTRP/MMP28/MTUS1/CCL4/IL6R/PLCB1/CD300A/AIF1/SPN/KLRK1/CCL5/CXCR3/DPP4/ANXA1/CX3CR1/TNFSF14	34
celltypes.B cell.down	celltypes	B cell	down	BP	GO:0071214	cellular response to abiotic stimulus	47/1232	309/14457	0.152104	1.78487	4.25659	6.72853e-05	0.00225512	0.00197878	RPL26/NUCKS1/NPM1/REST/DDX3X/VPS13A/FBXW7/CASP8AP2/WNK1/ADSS2/USP47/XPC/CALR/TGFB1/NLRP1/N4BP1/CAB39/FADD/HABP4/NMT2/PIK3R1/COPS9/CRY1/SERPINB6/ATM/CASP8/CLN3/SMPD1/ATP1A1/NET1/PTGER4/BBC3/BNIP3/STK39/IGF1R/CCND2/FAS/BAG3/MYC/H2AC25/NINJ1/TIMP1/LRRC8C/TNFRSF1A/GPR68/TNFSF14/GATA3	47
celltypes.B cell.down	celltypes	B cell	down	BP	GO:0009615	response to virus	54/1232	371/14457	0.145553	1.708	4.21654	6.77471e-05	0.00225512	0.00197878	EEF1G/DDX3X/JAK1/TPT1/SERINC3/RNF216/CARD8/URI1/RPS15A/RRP1B/CALR/ZC3HAV1/TGFB1/DNAJC3/NLRP1/CHMP3/FADD/ZMYND11/MX2/SENP7/IVNS1ABP/ZNFX1/ATG14/NCK1/IL23A/GBP2/GBP1/IFI6/PTPRC/LGALS8/GBP5/MOV10/UNC13D/SMPD1/USP20/IL17RA/SLFN13/TRIM32/GBP3/BNIP3/TNFAIP3/IKBKE/IFI44/SAMHD1/SERINC5/IFITM1/CCL4/TBX21/SPN/CCL5/STING1/OASL/PRF1/GATA3	54
celltypes.B cell.down	celltypes	B cell	down	BP	GO:0051208	sequestering of calcium ion	23/1232	113/14457	0.20354	2.38845	4.52238	6.79615e-05	0.00225512	0.00197878	GSTO1/FLNA/CALR/TGFB1/HSP90B1/CALM3/DIAPH1/CALM1/PTPRC/ERO1A/PDE4D/SLC8B1/SELENON/PLCG1/LIME1/LCK/PLCB1/PLCL1/CCR5/F2R/UBASH3B/CXCR3/FASLG	23
celltypes.B cell.down	celltypes	B cell	down	BP	GO:0006968	cellular defense response	13/1232	47/14457	0.276596	3.24573	4.7066	0.000105597	0.00331626	0.00290988	ITGB1/KLRG1/ITK/SPN/CCR5/KLRC2/SH2D1A/CX3CR1/TRAT1/PRF1/KLRC3/GNLY/TYROBP	13
celltypes.B cell.down	celltypes	B cell	down	BP	GO:0002274	myeloid leukocyte activation	35/1232	212/14457	0.165094	1.93731	4.19617	0.000109618	0.00342216	0.0030028	VAMP2/IL16/RBPJ/TGFB1/PIK3CD/RAC2/CD84/ATM/PTPRC/SBNO2/MCUB/UNC13D/CALHM2/STK39/BATF/ITGB2/STXBP1/CTSC/RASGRP1/FCER1G/RORA/LAT/CAMK4/LDLR/LCP2/CD300A/AIF1/CCL5/CD226/ANXA1/CD2/CX3CR1/TYROBP/FCGR3A/CST7	35
celltypes.B cell.down	celltypes	B cell	down	BP	GO:0141060	disruption of anatomical structure in another organism	15/1232	60/14457	0.25	2.93364	4.58087	0.000113077	0.00350937	0.00307932	RPL30/GBP2/GBP1/GBP5/APOL1/LGALS3/GBP3/NINJ1/GZMM/NKG7/PRF1/GZMH/GNLY/GZMB/GZMA	15
celltypes.B cell.down	celltypes	B cell	down	BP	GO:0043320	natural killer cell degranulation	6/1232	11/14457	0.545455	6.40068	5.46893	0.000120114	0.00368443	0.00323294	HLA-F/UNC13D/RAB27A/KLRC2/NKG7/FCGR3A	6
celltypes.B cell.down	celltypes	B cell	down	BP	GO:0070269	pyroptotic inflammatory response	11/1232	36/14457	0.305556	3.58557	4.74068	0.000134134	0.00404396	0.00354841	CARD8/NLRP1/GBP2/CASP8/GBP1/CASP6/GBP5/GBP3/NINJ1/GZMB/GZMA	11
celltypes.B cell.down	celltypes	B cell	down	BP	GO:0034113	heterotypic cell-cell adhesion	14/1232	56/14457	0.25	2.93364	4.42492	0.000189811	0.00541321	0.00474987	CD44/WNK1/ITGA4/MBP/MYADM/ITGB7/PTPRC/ITGB1/SKAP1/NINJ1/ITGB2/ITGA5/LCK/CD2	14
celltypes.B cell.down	celltypes	B cell	down	BP	GO:0071346	cellular response to type II interferon	19/1232	91/14457	0.208791	2.45008	4.23521	0.000200362	0.0056584	0.00496501	JAK1/RPL13A/ACTG1/PIM1/GBP2/CALM1/VPS26B/GBP1/VIM/GBP5/FLNB/GBP3/ZYX/RAB43/STXBP1/TXK/AIF1/CCL5/FASLG	19
celltypes.B cell.down	celltypes	B cell	down	BP	GO:0010959	regulation of metal ion transport	46/1232	315/14457	0.146032	1.71362	3.9084	0.000211634	0.00587674	0.0051566	FXYD5/VAMP2/B2M/WNK1/IL16/UTRN/GSTO1/FLNA/KCNAB2/TGFB1/CALM3/CAB39/DIAPH1/CASK/CD84/CALM1/EPB41/AKAP7/BIN1/TRPV2/MLLT6/SARAF/MCUB/PDE4D/SLC8B1/SELENON/ITGB1/ATP1A1/KCNQ1/LGALS3/AHNAK/NHERF1/STK39/PLCG1/ATP2B4/FYN/ANK3/LIME1/AMIGO1/AKAP5/CCL4/CCL5/F2R/UBASH3B/CXCR3/CD4	46
celltypes.B cell.down	celltypes	B cell	down	BP	GO:0002474	antigen processing and presentation of peptide antigen via MHC class I	10/1232	32/14457	0.3125	3.66706	4.60979	0.000219631	0.00603529	0.00529572	HLA-C/HLA-F/B2M/LNPEP/HLA-E/HLA-A/CALR/MFSD6/ERAP1/FCER1G	10
celltypes.B cell.down	celltypes	B cell	down	BP	GO:0062197	cellular response to chemical stress	43/1232	291/14457	0.147766	1.73398	3.86043	0.000258998	0.00683237	0.00599512	DDX3X/VPS13A/WNK1/SOD1/PYCR2/STK26/HM13/RPS3/ARL6IP5/PRDX2/RWDD1/CAB39/NUDT2/ERCC6L2/RIPK1/SERPINB6/ATM/PLEKHA1/CLN3/PYROXD1/KEAP1/SELENON/FXN/AGAP3/ATP1A1/NET1/XBP1/PRKCI/ERMP1/NCOA7/BMAL1/BNIP3/STK39/FAS/TNFAIP3/ERN1/NINJ1/LRRC8C/FYN/AIF1/PXN/PRR5L/FBLN5	43
celltypes.B cell.down	celltypes	B cell	down	BP	GO:0032609	type II interferon production	21/1232	109/14457	0.192661	2.26079	4.03266	0.000308635	0.00790466	0.00693601	HLA-A/ARID5A/FADD/IL23A/PTPN22/PDE4D/BTN3A2/BTN3A1/VSIR/LTA/IL27RA/TXK/CD96/CD3E/KLRK1/CD226/ZNF683/IL18R1/CD2/CRTAM/GATA3	21
celltypes.B cell.down	celltypes	B cell	down	BP	GO:0043254	regulation of protein-containing complex assembly	54/1232	398/14457	0.135678	1.59213	3.65605	0.000416004	0.0102506	0.00899452	ARPC2/DDX3X/RPL13A/NCK2/SPTAN1/SAR1A/TMC8/PFN1/CARD8/RPS3/SORL1/TGFB1/CDKN1B/TMOD3/MYADM/BIRC2/CLIP1/RAP1B/NCK1/HAUS6/GBP2/HSPA8/CRBN/SVIP/ATM/ARFGEF1/BIN1/OGT/PTPN22/HSPA5/CDC42EP3/STXBP5/TBCD/GBP5/EVL/ZNF827/ADD3/KCNK6/LGALS3/THRA/PTGER4/BBC3/SKAP1/NLRC3/MPP7/IKBKE/STXBP1/TRABD2A/CAMSAP2/SVIL/CDK5R1/FMN1/KIF21A/FNIP2	54
celltypes.B cell.down	celltypes	B cell	down	BP	GO:0042326	negative regulation of phosphorylation	32/1232	203/14457	0.157635	1.84979	3.72152	0.000494616	0.0118081	0.0103611	NPM1/SNX6/TERF2IP/SAMSN1/CDKN1B/DNAJC3/CALM3/PIBF1/ATG14/PDCD4/NCK1/CALM1/MVP/PTPN22/PTPRC/PKIA/RGS14/PDE4D/STK38/TRIB2/HEG1/DBNDD2/DUSP7/ZFYVE28/PTPRJ/CDKN2C/EPHA1/NIBAN1/CD300A/PRKCH/GNAQ/PRR5L	32
celltypes.B cell.down	celltypes	B cell	down	BP	GO:0042255	ribosome assembly	13/1232	55/14457	0.236364	2.77363	4.0222	0.000573823	0.0135156	0.0118594	RPL11/NPM1/RPS27/RPS15/DDX3X/RPS28/RPL24/RPL38/EIF2A/RPS14/NIP7/SBDS/MTERF4	13
celltypes.B cell.down	celltypes	B cell	down	BP	GO:0043299	leukocyte degranulation	15/1232	69/14457	0.217391	2.551	3.94154	0.000582471	0.0136583	0.0119846	VAMP2/HLA-F/PIK3CD/RAC2/CD84/UNC13D/RAB27A/ITGB2/STXBP1/RASGRP1/LAT/CD300A/KLRC2/NKG7/FCGR3A	15
celltypes.B cell.down	celltypes	B cell	down	BP	GO:0097396	response to interleukin-17	6/1232	14/14457	0.428571	5.0291	4.60337	0.000623943	0.0143127	0.0125588	USP25/STAT3/NOTCH1/IL17RA/TRIM32/IKBKE	6
celltypes.B cell.down	celltypes	B cell	down	BP	GO:0097398	cellular response to interleukin-17	6/1232	14/14457	0.428571	5.0291	4.60337	0.000623943	0.0143127	0.0125588	USP25/STAT3/NOTCH1/IL17RA/TRIM32/IKBKE	6
celltypes.B cell.down	celltypes	B cell	down	BP	GO:1903054	negative regulation of extracellular matrix organization	6/1232	14/14457	0.428571	5.0291	4.60337	0.000623943	0.0143127	0.0125588	TGFB1/NOTCH1/ADTRP/TNFRSF1A/DPP4/TGFBR3	6
celltypes.B cell.down	celltypes	B cell	down	BP	GO:0002437	inflammatory response to antigenic stimulus	14/1232	63/14457	0.222222	2.60768	3.90312	0.000696427	0.0157697	0.0138373	HLA-E/RBPJ/NOTCH1/LTA/FOSL2/PLCG1/RASGRP1/FYN/CD6/YES1/SPN/CD28/GATA3/FCGR3A	14
celltypes.B cell.down	celltypes	B cell	down	BP	GO:0002711	positive regulation of T cell mediated immunity	14/1232	63/14457	0.222222	2.60768	3.90312	0.000696427	0.0157697	0.0138373	HLA-C/HLA-F/B2M/HLA-E/HLA-A/ARID5A/FADD/KLHL22/IL23A/PTPRC/TBX21/IL18R1/CD7/GATA3	14
celltypes.B cell.down	celltypes	B cell	down	BP	GO:0050868	negative regulation of T cell activation	21/1232	117/14457	0.179487	2.10621	3.66679	0.000824257	0.0179702	0.0157681	HLA-E/TGFB1/PRDX2/RUNX3/ZC3H8/LAX1/SMAD7/PTPN22/LGALS1/JAK3/VSIR/TNFAIP8L2/LGALS3/NDFIP1/PAG1/TBX21/CD300A/SPN/ANXA1/CRTAM/TIGIT	21
celltypes.B cell.down	celltypes	B cell	down	BP	GO:0050920	regulation of chemotaxis	28/1232	175/14457	0.16	1.87753	3.56467	0.000852656	0.0184369	0.0161777	WNK1/IL16/GPSM3/CALR/TGFB1/RAC2/NOTCH1/IL23A/TMSB4X/SLC8B1/STK39/PTPRJ/NINJ1/TIAM1/MMP28/MTUS1/CCL4/IL6R/ROBO3/AIF1/KLRK1/CCL5/CXCR3/DPP4/KIF21A/CX3CR1/TNFSF14/CCR4	28
celltypes.B cell.down	celltypes	B cell	down	BP	GO:0140238	presynaptic endocytosis	16/1232	79/14457	0.202532	2.37662	3.74465	0.000883183	0.0190191	0.0166884	CANX/VAMP2/ACTG1/AP2B1/CALM3/MX2/CLTB/AP2A2/CALM1/BIN1/SYNJ2/AP3M2/SYNJ1/CAPN2/AAK1/BTBD8	16
celltypes.B cell.down	celltypes	B cell	down	BP	GO:1903306	negative regulation of regulated secretory pathway	7/1232	20/14457	0.35	4.1071	4.24389	0.000921892	0.0194556	0.0170715	REST/HLA-F/RAP1A/RAP1B/NOTCH1/CD84/CD300A	7
celltypes.B cell.down	celltypes	B cell	down	BP	GO:0072659	protein localization to plasma membrane	39/1232	273/14457	0.142857	1.67637	3.44347	0.000953667	0.0199665	0.0175198	GOLGA4/VAMP2/WNK1/FLNA/ARL6IP5/RAP1A/SORL1/TGFB1/DENND4C/CNST/ZDHHC3/PIK3R1/GOLGA7/GBP1/MACF1/CLN3/RAPGEF6/ITGB1/LGALS3/PRKCI/CNPY4/OPTN/NHERF1/S100A10/SKAP1/TSPAN14/PLEKHF1/PTCH1/TNIK/STXBP1/ATP2B4/NECTIN3/ANK3/AKAP5/LDLRAP1/FYB1/PRKCH/TNFRSF1A/NSG1	39
celltypes.B cell.down	celltypes	B cell	down	BP	GO:1901142	insulin metabolic process	6/1232	15/14457	0.4	4.69383	4.36858	0.000965288	0.0200506	0.0175936	P4HB/YIPF5/CTSD/FOSL2/NLGN2/ERN1	6
celltypes.B cell.down	celltypes	B cell	down	BP	GO:1903978	regulation of microglial cell activation	6/1232	15/14457	0.4	4.69383	4.36858	0.000965288	0.0200506	0.0175936	ATM/PTPRC/CALHM2/CTSC/LDLR/CST7	6
celltypes.B cell.down	celltypes	B cell	down	BP	GO:0070741	response to interleukin-6	9/1232	32/14457	0.28125	3.30035	3.97597	0.00106469	0.0217725	0.0191045	JAK1/STAT3/RIPK1/SBNO2/STAT4/IL6ST/IL6R/SELPLG/GFI1	9
celltypes.B cell.down	celltypes	B cell	down	BP	GO:0006986	response to unfolded protein	23/1232	136/14457	0.169118	1.98452	3.5208	0.00111828	0.0227801	0.0199886	NCK2/TRAM1/HERPUD2/CREBRF/ABCA7/STT3B/EDEM3/DNAJC3/NCK1/PIK3R1/MANF/HSPA8/ERO1A/HSPA5/RPAP2/XBP1/DNAJB1/ERMP1/PARP8/BBC3/OPTN/BAG3/ERN1	23
celltypes.B cell.down	celltypes	B cell	down	BP	GO:0006925	inflammatory cell apoptotic process	7/1232	21/14457	0.333333	3.91153	4.0751	0.00128202	0.0252387	0.0221459	ITPKB/PIK3CD/CCR5/CCL5/CTSL/ANXA1/FASLG	7
celltypes.B cell.down	celltypes	B cell	down	BP	GO:0098760	response to interleukin-7	7/1232	21/14457	0.333333	3.91153	4.0751	0.00128202	0.0252387	0.0221459	JAK1/P4HB/IL2RG/JAK3/GIPC1/FOSL2/IL7R	7
celltypes.B cell.down	celltypes	B cell	down	BP	GO:0010712	regulation of collagen metabolic process	9/1232	33/14457	0.272727	3.20034	3.86221	0.00135472	0.0258033	0.0226413	SUCO/TGFB1/NOTCH1/VIM/VSIR/ITGB1/IL6R/RGCC/F2R	9
celltypes.B cell.down	celltypes	B cell	down	BP	GO:0060544	regulation of necroptotic process	8/1232	27/14457	0.296296	3.47691	3.9318	0.00138633	0.0261224	0.0229213	BIRC2/FADD/RIPK1/CFLAR/OGT/CYLD/CASP8/CASP6	8
celltypes.B cell.down	celltypes	B cell	down	BP	GO:0046718	symbiont entry into host cell	21/1232	122/14457	0.172131	2.01989	3.45274	0.00143349	0.0267105	0.0234374	CD46/P4HB/KPNA3/CTSB/ITGB7/NPC1/LGALS1/ITGB1/SMPD1/SLC20A2/WWP1/ITGA5/NECTIN3/LDLR/SELPLG/CCR5/DPP4/GPR15/CTSL/CD4/NCAM1	21
celltypes.B cell.down	celltypes	B cell	down	BP	GO:1905477	positive regulation of protein localization to membrane	18/1232	98/14457	0.183673	2.15533	3.50259	0.00143779	0.0267105	0.0234374	CNST/PIK3R1/CLN3/ITGB1/TCAF2/LGALS3/PRKCI/CNPY4/STOM/NLGN2/SLC5A3/ITGB2/ATP2B4/CDK5R1/FYN/ANK3/AKAP5/PRKCH	18
celltypes.B cell.down	celltypes	B cell	down	BP	GO:0070266	necroptotic process	10/1232	40/14457	0.25	2.93364	3.73767	0.00154088	0.0283264	0.0248553	BIRC2/FADD/RIPK1/CFLAR/OGT/CYLD/CASP8/CASP6/FAS/FASLG	10
celltypes.B cell.down	celltypes	B cell	down	BP	GO:0032496	response to lipopolysaccharide	39/1232	281/14457	0.13879	1.62864	3.24797	0.0016452	0.0299333	0.0262653	ERBIN/RPL13A/B2M/CARD8/TAB2/ARID5A/PRDX2/FBXO3/RPS6KA3/PDCD4/NOTCH1/GBP2/BIN1/CASP8/PTPN22/LITAF/SBNO2/VIM/GBP5/SELENOW/LTA/XBP1/PLSCR3/CAPN2/PTGER4/GBP3/FOSL2/SIGIRR/TNFAIP3/CD6/CD96/KLRK1/PRKCA/CCR5/F2R/CX3CR1/GFI1/PTGER2/FASLG	39
celltypes.B cell.down	celltypes	B cell	down	BP	GO:0072577	endothelial cell apoptotic process	12/1232	54/14457	0.222222	2.60768	3.61246	0.00164531	0.0299333	0.0262653	ITGA4/TGFB1/HIPK1/PDCD4/XBP1/PRKCI/PLCG1/TNFAIP3/RGCC/GATA3/CD40LG/FASLG	12
celltypes.B cell.down	celltypes	B cell	down	BP	GO:0018212	peptidyl-tyrosine modification	27/1232	174/14457	0.155172	1.82088	3.32489	0.00166355	0.0301611	0.0264652	FBXW7/SNX6/ARL2BP/ABI2/SAMSN1/TGFB1/PIBF1/RAP2B/MVP/PTPRC/JAK3/TPST2/SEMA4D/ZFYVE28/EPHA4/IGF1R/PTPRJ/ITGB2/ITGA5/EPHA1/FYN/LCK/IL6R/YES1/ZAP70/CD3E/CD4	27
celltypes.B cell.down	celltypes	B cell	down	BP	GO:1900101	regulation of endoplasmic reticulum unfolded protein response	9/1232	34/14457	0.264706	3.10621	3.75271	0.0017051	0.030599	0.0268494	NCK2/CREBRF/ABCA7/NCK1/PIK3R1/HSPA5/XBP1/BBC3/ERN1	9
celltypes.B cell.down	celltypes	B cell	down	BP	GO:0043555	regulation of translation in response to stress	7/1232	22/14457	0.318182	3.73373	3.91643	0.00174343	0.0308371	0.0270583	NPM1/DDX3X/NCK2/DNAJC3/RPS6KA3/NCK1/PRKCH	7
celltypes.B cell.down	celltypes	B cell	down	BP	GO:0060396	growth hormone receptor signaling pathway	7/1232	22/14457	0.318182	3.73373	3.91643	0.00174343	0.0308371	0.0270583	JAK1/STAT3/PIK3R1/STAT5B/JAK3/LEPROTL1/PXN	7
celltypes.B cell.down	celltypes	B cell	down	BP	GO:0002369	T cell cytokine production	9/1232	35/14457	0.257143	3.01746	3.64719	0.00212444	0.0361565	0.0317259	HLA-F/B2M/HLA-A/ARID5A/SMAD7/TBX21/IL18R1/CD7/GATA3	9
celltypes.B cell.down	celltypes	B cell	down	BP	GO:0002724	regulation of T cell cytokine production	9/1232	35/14457	0.257143	3.01746	3.64719	0.00212444	0.0361565	0.0317259	HLA-F/B2M/HLA-A/ARID5A/SMAD7/TBX21/IL18R1/CD7/GATA3	9
celltypes.B cell.down	celltypes	B cell	down	BP	GO:0071404	cellular response to low-density lipoprotein particle stimulus	8/1232	29/14457	0.275862	3.23712	3.68059	0.00229974	0.0383968	0.0336917	TXNIP/TGFB1/NPC1/ITGB1/ITGB2/ADTRP/FCER1G/LDLR	8
celltypes.B cell.down	celltypes	B cell	down	BP	GO:0036092	phosphatidylinositol-3-phosphate biosynthetic process	7/1232	23/14457	0.304348	3.57139	3.76678	0.00232402	0.0384522	0.0337402	PIK3CD/ATG14/ATM/SYNJ2/SYNJ1/INPP4A/INPP4B	7
celltypes.B cell.down	celltypes	B cell	down	BP	GO:0034765	regulation of monoatomic ion transmembrane transport	37/1232	268/14457	0.13806	1.62007	3.12727	0.00234076	0.0384522	0.0337402	FXYD5/VAMP2/WNK1/UTRN/GSTO1/FLNA/KCNAB2/TGFB1/CALM3/CAB39/DIAPH1/RIPK1/TMSB4X/CALM1/CRBN/AKAP7/BIN1/MCUB/PDE4D/SELENON/ITGB1/TCAF2/KCNQ1/AHNAK/NHERF1/STOM/STK39/PLCG1/ATP2B4/FYN/ANK3/LIME1/AMIGO1/AKAP5/F2R/UBASH3B/CXCR3	37
celltypes.B cell.down	celltypes	B cell	down	BP	GO:0034976	response to endoplasmic reticulum stress	37/1232	268/14457	0.13806	1.62007	3.12727	0.00234076	0.0384522	0.0337402	DDX3X/CANX/NCK2/HERPUD2/MAN1A2/P4HB/USP25/SERINC3/CREBRF/ABCA7/HM13/UBE4A/STT3B/CALR/UBAC2/EDEM3/DNAJC3/HSP90B1/PDIA4/HYOU1/NCK1/PIK3R1/MANF/SVIP/SDF2L1/ERO1A/HSPA5/RPAP2/FAM8A1/XBP1/ERMP1/PARP8/BBC3/ERN1/NIBAN1/RASGRF2/MAN1C1	37
celltypes.B cell.down	celltypes	B cell	down	BP	GO:0030279	negative regulation of ossification	9/1232	36/14457	0.25	2.93364	3.54537	0.00262192	0.0421746	0.0370065	RBPJ/SMAD2/TGFB1/NOTCH1/SMAD7/LTBP3/SRGN/ACVR2B/RFLNB	9
celltypes.B cell.down	celltypes	B cell	down	BP	GO:0042060	wound healing	49/1232	383/14457	0.127937	1.50129	3.03467	0.00264309	0.0422574	0.0370792	CD44/C6orf89/NACA/ACTG1/FLNA/TGFB1/PRDX2/CHMP3/MRTFA/AK3/LNPK/CASK/CHMP7/RAP2B/CFLAR/ARFGEF1/ENPP4/DGKE/MACF1/ITGB1/SMPD1/RAB27A/DGKA/XBP1/RASA3/PAFAH2/AHNAK/S100A10/DGKH/DGKZ/PTPRJ/TNFAIP3/IL6ST/STXBP1/ITGA5/TIMP1/ADTRP/FCER1G/LCK/IL6R/JAML/PRKCA/F2R/UBASH3B/NOG/GNAQ/PRKCQ/ANXA1/CD40LG	49
celltypes.B cell.down	celltypes	B cell	down	BP	GO:0032365	intracellular lipid transport	10/1232	43/14457	0.232558	2.72897	3.46546	0.00275798	0.0438286	0.0384578	CPT1A/PIP4K2A/TMEM41B/NPC1/SLC25A20/ABCA2/GRAMD1A/ABCD2/LDLRAP1/LDLR	10
celltypes.B cell.down	celltypes	B cell	down	BP	GO:0032102	negative regulation of response to external stimulus	45/1232	346/14457	0.130058	1.52617	3.02357	0.00282105	0.0445624	0.0391017	HLA-F/PIM1/HLA-E/HLA-A/SOD1/STAT3/CARD8/TGFB1/PRDX2/NOTCH1/CASK/TMSB4X/CYLD/PTPRC/ZDHHC18/ARRB2/TNFAIP8L2/PTGER4/NDFIP1/LYAR/NLRC3/PLCG1/EPHA4/SIGIRR/TNFAIP3/IER3/SAMHD1/FYN/ADTRP/MMP28/RORA/YES1/LDLR/CD96/AIF1/SPN/AOAH/KLRK1/TNFRSF1A/UBASH3B/DPP4/KLRD1/TIGIT/GATA3/CST7	45
celltypes.B cell.down	celltypes	B cell	down	BP	GO:0032984	protein-containing complex disassembly	35/1232	253/14457	0.13834	1.62336	3.05299	0.00292332	0.0457669	0.0401586	HMGA1/WNK1/WDR1/SPTAN1/OGFOD1/TMOD3/ATXN7/CHMP3/ATG14/LIX1L/CCDC88C/CHMP7/HSPA8/CALM1/ZFAND1/DSTN/SMAD7/CLN3/MTRFR/TECPR1/ADD3/SH3BP1/KIF2A/SYNJ1/STMN3/BNIP3/HDGFL3/IGF1R/MYC/GABARAPL1/H2AC25/CAMSAP2/LIMA1/SVIL/KIF21A	35
celltypes.B cell.down	celltypes	B cell	down	BP	GO:0006909	phagocytosis	30/1232	208/14457	0.144231	1.69249	3.07031	0.00302012	0.0470034	0.0412436	IL2RG/SOD1/ABCA7/CALR/TGFB1/ICAM3/CDC42SE1/ELMO2/CDC42SE2/CLN3/PTPRC/UNC13D/ITGB1/RAB27A/SH3BP1/ITGAL/LYAR/PTPRJ/MFGE8/ITGB2/BIN2/FYN/FCER1G/YES1/LDLR/CD300A/AIF1/ANXA1/IL2RB/TYROBP	30
celltypes.B cell.down	celltypes	B cell	down	BP	GO:0048302	regulation of isotype switching to IgG isotypes	5/1232	13/14457	0.384615	4.5133	3.86789	0.00320692	0.0490485	0.0430381	PTPRC/IL27RA/NDFIP1/TBX21/CD28	5
celltypes.B cell.down	celltypes	B cell	down	BP	GO:0043087	regulation of GTPase activity	24/1232	156/14457	0.153846	1.80532	3.08659	0.00327801	0.0499849	0.0438597	WNK1/SOD1/RRP1B/RAP1A/TBC1D15/ARFGEF1/LIMS1/RAPGEF6/ITGB1/NET1/FGD3/SH3BP1/SEMA4D/DOCK10/S100A10/DOCK9/EPHA4/RASGRP1/EPHA1/TIAM1/RGS10/ITGA6/KLRK1/F2R	24
celltypes.B cell.down	celltypes	B cell	down	BP	GO:0002269	leukocyte activation involved in inflammatory response	10/1232	44/14457	0.227273	2.66695	3.37989	0.00330179	0.0500581	0.043924	ATM/PTPRC/CALHM2/ITGB2/CTSC/LDLR/AIF1/CX3CR1/TYROBP/CST7	10
celltypes.B cell.down	celltypes	B cell	down	BP	GO:0033028	myeloid cell apoptotic process	8/1232	31/14457	0.258065	3.02828	3.45038	0.00362822	0.054537	0.047854	ITPKB/PIK3CD/STAT5B/THRA/CCR5/CCL5/CTSL/ANXA1	8
celltypes.B cell.down	celltypes	B cell	down	BP	GO:0007015	actin filament organization	52/1232	419/14457	0.124105	1.45632	2.89305	0.00377128	0.0565263	0.0495995	ARPC2/TMSB10/NCK2/LIMD2/ACTG1/WDR1/CAPZB/SPTAN1/PFN1/FLNA/ABI2/WIPF1/ARHGEF18/RAC2/TMOD3/MYADM/HSP90B1/DIAPH1/NCK1/PIK3R1/JMY/LUZP1/ELMO2/TMSB4X/ARFGEF1/BIN1/RHOF/DSTN/CDC42EP3/GMFG/EVL/ADD3/SH3BP1/PRKCI/RHPN1/PTGER4/MYO1F/ZYX/S100A10/MYO6/IQGAP2/LIMA1/SVIL/EPHA1/TPM2/FMN1/ARRB1/RFLNB/AIF1/PXN/RGCC/ACTN1	52
celltypes.B cell.down	celltypes	B cell	down	BP	GO:0051402	neuron apoptotic process	37/1232	276/14457	0.134058	1.57311	2.93409	0.00387218	0.0571757	0.0501693	FBXW7/SNX6/SOD1/HIPK2/TGFB1/NLRP1/FADD/DNAJC5/FAM162A/RIPK1/AGAP2/HYOU1/CFLAR/ATM/CASP8/PPT1/MCL1/CLN3/SIGMAR1/CASP6/NAE1/IL27RA/PRKCI/BBC3/BNIP3/EPHA4/FAS/RETREG1/IL6ST/STXBP1/CDK5R1/COL6A2/ITGA1/F2R/CX3CR1/GATA3/FASLG	37
celltypes.B cell.down	celltypes	B cell	down	BP	GO:0060392	negative regulation of SMAD protein signal transduction	6/1232	19/14457	0.315789	3.70566	3.60187	0.00389046	0.0571757	0.0501693	SMAD7/SKI/LDLRAD4/XBP1/NOG/TGFBR3	6
celltypes.B cell.down	celltypes	B cell	down	BP	GO:0033032	regulation of myeloid cell apoptotic process	7/1232	25/14457	0.28	3.28568	3.49103	0.00391995	0.05729	0.0502696	ITPKB/PIK3CD/STAT5B/THRA/CCR5/CCL5/ANXA1	7
celltypes.B cell.down	celltypes	B cell	down	BP	GO:0010002	cardioblast differentiation	5/1232	14/14457	0.357143	4.19092	3.64572	0.00464191	0.064809	0.0568672	REST/RBPJ/NOTCH1/ITGB1/EOMES	5
celltypes.B cell.down	celltypes	B cell	down	BP	GO:0048291	isotype switching to IgG isotypes	5/1232	14/14457	0.357143	4.19092	3.64572	0.00464191	0.064809	0.0568672	PTPRC/IL27RA/NDFIP1/TBX21/CD28	5
celltypes.B cell.down	celltypes	B cell	down	BP	GO:1901985	positive regulation of protein acetylation	5/1232	14/14457	0.357143	4.19092	3.64572	0.00464191	0.064809	0.0568672	DDX3X/ARID5A/XBP1/BMAL1/DIP2A	5
celltypes.B cell.down	celltypes	B cell	down	BP	GO:0002347	response to tumor cell	10/1232	46/14457	0.217391	2.551	3.21569	0.00464325	0.064809	0.0568672	TXNIP/HLA-A/TGFB1/PRDX2/NOTCH1/KLHL22/CD226/NKG7/PRF1/CRTAM	10
celltypes.B cell.down	celltypes	B cell	down	BP	GO:0030168	platelet activation	20/1232	126/14457	0.15873	1.86263	2.96827	0.00483697	0.0671575	0.058928	ACTG1/FLNA/RAP2B/DGKE/DGKA/RASA3/DGKH/DGKZ/PTPRJ/IL6ST/STXBP1/FCER1G/LCK/IL6R/PRKCA/F2R/UBASH3B/GNAQ/PRKCQ/CD40LG	20
celltypes.B cell.down	celltypes	B cell	down	BP	GO:0002562	somatic diversification of immune receptors via germline recombination within a single locus	13/1232	69/14457	0.188406	2.21086	3.07716	0.00501866	0.0682871	0.0599191	RIF1/TGFB1/RNF168/ATM/PTPRC/IL27RA/NDFIP1/BATF/TBX21/BCL11B/LEF1/CD28/CD40LG	13
celltypes.B cell.down	celltypes	B cell	down	BP	GO:0002089	lens morphogenesis in camera-type eye	6/1232	20/14457	0.3	3.52037	3.44249	0.00516271	0.0685691	0.0601666	ABI2/HIPK2/HIPK1/SKI/CITED2/NECTIN3	6
celltypes.B cell.down	celltypes	B cell	down	BP	GO:0046716	muscle cell cellular homeostasis	6/1232	20/14457	0.3	3.52037	3.44249	0.00516271	0.0685691	0.0601666	SOD1/TGFB1/FXN/TRIM32/ANKH/BAG3	6
celltypes.B cell.down	celltypes	B cell	down	BP	GO:0098761	cellular response to interleukin-7	6/1232	20/14457	0.3	3.52037	3.44249	0.00516271	0.0685691	0.0601666	JAK1/P4HB/IL2RG/JAK3/GIPC1/IL7R	6
celltypes.B cell.down	celltypes	B cell	down	BP	GO:1990858	cellular response to lectin	6/1232	20/14457	0.3	3.52037	3.44249	0.00516271	0.0685691	0.0601666	FYN/KLRK1/KLRC2/KLRD1/KLRC3/TYROBP	6
celltypes.B cell.down	celltypes	B cell	down	BP	GO:0032507	maintenance of protein location in cell	11/1232	54/14457	0.203704	2.39038	3.12417	0.00517258	0.0685691	0.0601666	SKP1/VPS13A/ARL2BP/SORL1/HK1/HSPA5/SUN2/SYNE1/SRGN/ANK3/CD4	11
celltypes.B cell.down	celltypes	B cell	down	BP	GO:0001837	epithelial to mesenchymal transition	23/1232	153/14457	0.150327	1.76402	2.89971	0.00526711	0.0694812	0.0609669	DDX5/RBPJ/FLNA/SMAD2/TGFB1/AKNA/PDCD4/NOTCH1/GLIPR2/SMAD7/LDLRAD4/S100A4/BCL9L/EPHA4/TIAM1/RFLNB/LEF1/RGCC/NOG/EOMES/GATA3/TGFBR3/NCAM1	23
celltypes.B cell.down	celltypes	B cell	down	BP	GO:0051092	positive regulation of NF-kappaB transcription factor activity	18/1232	110/14457	0.163636	1.9202	2.95686	0.00528165	0.0694812	0.0609669	NPM1/TERF2IP/UBE2V1/RPS3/RPS6KA5/RIPK1/CFLAR/TRADD/TRIM32/TRIM14/PRKCI/TRAF1/RTKN2/PRKCH/PRKCQ/IL18R1/SLCO3A1/CD40LG	18
celltypes.B cell.down	celltypes	B cell	down	BP	GO:0061383	trabecula morphogenesis	9/1232	40/14457	0.225	2.64028	3.1706	0.00559547	0.0727135	0.0638031	NACA/RBPJ/NOTCH1/SBNO2/HEG1/SEMA4D/SLC40A1/NOG/TGFBR3	9
celltypes.B cell.down	celltypes	B cell	down	BP	GO:1904894	positive regulation of receptor signaling pathway via STAT	9/1232	40/14457	0.225	2.64028	3.1706	0.00559547	0.0727135	0.0638031	CRLF3/TGFB1/PIBF1/NOTCH1/CALM1/OCIAD2/IL7R/CCL5/F2R	9
celltypes.B cell.down	celltypes	B cell	down	BP	GO:0150076	neuroinflammatory response	13/1232	70/14457	0.185714	2.17928	3.01864	0.00569449	0.0736376	0.0646139	VPS13A/ATM/PTPRC/ITGB1/CALHM2/BPGM/ITGB2/CTSC/LDLR/AIF1/CX3CR1/TYROBP/CST7	13
celltypes.B cell.down	celltypes	B cell	down	BP	GO:0010720	positive regulation of cell development	48/1232	389/14457	0.123393	1.44797	2.73362	0.00584533	0.0752194	0.066002	GOLGA4/CD46/IL2RG/ITPKB/TGFB1/RUNX3/PHF10/FADD/RIPK1/NOTCH1/IL23A/BIN1/TRPV2/CYLD/CASP8/SMAD7/MACF1/PTPRC/RGS14/STAT5B/VSIR/ITGB1/LTA/TRIM32/XBP1/SEMA4D/PRKCI/CD27/EEIG1/EPHA4/IL6ST/RASGRP1/TESPA1/TIAM1/AMIGO1/IL7R/ZAP70/TOX/LEF1/PRKCA/PRKCH/GPR68/ANXA1/CD4/CX3CR1/GATA3/ID2/TYROBP	48
celltypes.B cell.down	celltypes	B cell	down	BP	GO:0051338	regulation of transferase activity	51/1232	419/14457	0.121718	1.42831	2.71549	0.00600236	0.0770521	0.0676101	RPL11/NPM1/DDX3X/SKP1/RPS2/FBXW7/PIM1/SNX6/TAB2/RPS3/RAP1A/CDKN1B/CALM3/CAB39/PIBF1/CCNG1/AGAP2/PDCD4/CALM1/RAP2B/MVP/PTPN22/PTPRC/PKIA/RGS14/PIK3R5/STK38/RBL2/TRIB2/CCND3/HEG1/NHERF1/DBNDD2/DUSP7/ZFYVE28/EPHA4/PTPRJ/CCND2/ERN1/CDKN2C/RASGRP1/EPHA1/CDK5R1/PLAAT4/LAT/LCP2/CD300A/RGCC/PRKCH/GNAQ/CD4	51
celltypes.B cell.down	celltypes	B cell	down	BP	GO:0048710	regulation of astrocyte differentiation	7/1232	27/14457	0.259259	3.0423	3.2419	0.00623249	0.0796189	0.0698623	NOTCH1/BIN1/EPHA4/IL6ST/LDLR/NOG/ID2	7
celltypes.B cell.down	celltypes	B cell	down	BP	GO:0141084	inflammasome-mediated signaling pathway	10/1232	48/14457	0.208333	2.4447	3.05995	0.00637959	0.0811053	0.0711666	DDX3X/CARD8/NLRP1/GBP2/HSPA8/OGT/PTPN22/GBP5/KCNK6/NLRC3	10
celltypes.B cell.down	celltypes	B cell	down	BP	GO:0034612	response to tumor necrosis factor	28/1232	201/14457	0.139303	1.63467	2.76552	0.00660333	0.0829504	0.0727856	ERBIN/TMC8/CARD8/RPS3/BIRC2/HIPK1/RIPK1/GBP2/TMSB4X/TRADD/CYLD/CASP8/GBP1/LIMS1/RFFL/SMPD1/TRIM32/GBP3/FAS/TNFAIP3/TRAF1/TNFSF13B/RORA/TNFRSF25/TNFRSF1A/CCL5/CX3CR1/GATA3	28
celltypes.B cell.down	celltypes	B cell	down	BP	GO:0010559	regulation of glycoprotein biosynthetic process	8/1232	34/14457	0.235294	2.76108	3.13777	0.00664634	0.0832924	0.0730857	ABCA7/POMT1/JAK3/ITM2B/ABCA2/PXYLP1/ITM2A/PLCB1	8
celltypes.B cell.down	celltypes	B cell	down	BP	GO:0032495	response to muramyl dipeptide	6/1232	21/14457	0.285714	3.35274	3.293	0.00671498	0.0836073	0.073362	ERBIN/NLRP1/NOTCH1/PTPN22/VIM/TNFAIP3	6
celltypes.B cell.down	celltypes	B cell	down	BP	GO:0032329	serine transport	4/1232	10/14457	0.4	4.69383	3.56632	0.00725158	0.0857832	0.0752713	SERINC3/SFXN3/SFXN1/SERINC5	4
celltypes.B cell.down	celltypes	B cell	down	BP	GO:0044829	positive regulation by host of viral genome replication	4/1232	10/14457	0.4	4.69383	3.56632	0.00725158	0.0857832	0.0752713	NUCKS1/EEF1A1/PPIB/STOM	4
celltypes.B cell.down	celltypes	B cell	down	BP	GO:0046834	lipid phosphorylation	4/1232	10/14457	0.4	4.69383	3.56632	0.00725158	0.0857832	0.0752713	DGKE/DGKA/DGKH/DGKZ	4
celltypes.B cell.down	celltypes	B cell	down	BP	GO:0050792	regulation of viral process	20/1232	131/14457	0.152672	1.79154	2.77765	0.00749159	0.0880303	0.077243	DDX5/DDX3X/PABPC1/P4HB/ZC3HAV1/N4BP1/ZNFX1/NOTCH1/TMEM250/LGALS1/SMPD1/TRIM32/TRIM14/STOM/IFITM1/CCL5/CD28/OASL/CD4/IL32	20
celltypes.B cell.down	celltypes	B cell	down	BP	GO:0036314	response to sterol	7/1232	28/14457	0.25	2.93364	3.12586	0.00771074	0.0902037	0.07915	SMAD2/TGFB1/ABCA2/GRAMD1A/PTCH1/RORA/CCR5	7
celltypes.B cell.down	celltypes	B cell	down	BP	GO:0071402	cellular response to lipoprotein particle stimulus	8/1232	35/14457	0.228571	2.68219	3.04108	0.00798617	0.0924013	0.0810784	TXNIP/TGFB1/NPC1/ITGB1/ITGB2/ADTRP/FCER1G/LDLR	8
celltypes.B cell.down	celltypes	B cell	down	BP	GO:0042274	ribosomal small subunit biogenesis	17/1232	106/14457	0.160377	1.88196	2.78159	0.00807372	0.0932099	0.0817879	RPS16/RPS6/RPS13/NPM1/RPS27/RPS15/RPS21/RPS12/RPS28/RPS27A/FBL/RPS25/RPS3A/RPS4X/RPS24/RPS14/RPS15A	17
celltypes.B cell.down	celltypes	B cell	down	BP	GO:0030032	lamellipodium assembly	12/1232	65/14457	0.184615	2.16638	2.87653	0.00811819	0.093315	0.0818801	ARPC2/NCK2/CAPZB/ABI2/RAC2/ARHGEF6/NCK1/PIK3R1/ABLIM1/ITGB1/AUTS2/SPATA13	12
celltypes.B cell.down	celltypes	B cell	down	BP	GO:0030033	microvillus assembly	5/1232	16/14457	0.3125	3.66706	3.2578	0.00877404	0.100199	0.0879203	FXYD5/STK26/RAPGEF6/NHERF1/TNIK	5
celltypes.B cell.down	celltypes	B cell	down	BP	GO:0032410	negative regulation of transporter activity	9/1232	43/14457	0.209302	2.45607	2.91848	0.00916715	0.103757	0.0910429	GSTO1/CALM3/CAB39/CALM1/TCAF2/KCNQ1/NDFIP1/STK39/ANK3	9
celltypes.B cell.down	celltypes	B cell	down	BP	GO:0141085	regulation of inflammasome-mediated signaling pathway	9/1232	43/14457	0.209302	2.45607	2.91848	0.00916715	0.103757	0.0910429	DDX3X/CARD8/GBP2/HSPA8/OGT/PTPN22/GBP5/KCNK6/NLRC3	9
celltypes.B cell.down	celltypes	B cell	down	BP	GO:0039531	regulation of cytoplasmic pattern recognition receptor signaling pathway	18/1232	116/14457	0.155172	1.82088	2.70927	0.00918483	0.103757	0.0910429	ERBIN/DDX3X/CARD8/ZC3HAV1/BIRC2/ZDHHC3/GBP2/HSPA8/OGT/PPT1/PTPN22/ZDHHC18/GBP5/KCNK6/NLRC3/TNFAIP3/RNF125/OASL	18
celltypes.B cell.down	celltypes	B cell	down	BP	GO:0031589	cell-substrate adhesion	41/1232	330/14457	0.124242	1.45793	2.56841	0.00920366	0.103757	0.0910429	STK4/ARPC2/CD44/ACTG1/SLK/P4HB/UTRN/FLNA/ITGA4/CALR/RAC2/MYADM/PTPRA/NOTCH1/PIK3R1/CASK/GBP1/MACF1/LIMS1/ITGB7/TBCD/UNC13D/ITGB1/SPOCK2/ITGAL/ZYX/S100A10/SKAP1/PTPRJ/ITGB2/ITGA5/EPHA1/TIAM1/FMN1/ITGA6/ITGA1/CD96/CD3E/PXN/ACTN1/FBLN5	41
celltypes.B cell.down	celltypes	B cell	down	BP	GO:0051607	defense response to virus	36/1232	282/14457	0.12766	1.49803	2.57781	0.00937458	0.105459	0.0925359	SERINC3/RNF216/CARD8/ZC3HAV1/DNAJC3/NLRP1/CHMP3/FADD/ZMYND11/MX2/SENP7/ZNFX1/ATG14/NCK1/IL23A/GBP2/GBP1/IFI6/PTPRC/GBP5/MOV10/UNC13D/USP20/SLFN13/TRIM32/GBP3/BNIP3/TNFAIP3/IKBKE/SAMHD1/SERINC5/IFITM1/SPN/STING1/OASL/PRF1	36
celltypes.B cell.down	celltypes	B cell	down	BP	GO:1903533	regulation of protein targeting	13/1232	75/14457	0.173333	2.03399	2.74013	0.0102361	0.112512	0.0987245	UBL5/FBXW7/USP36/RAC2/TOMM7/ATG13/TCAF2/STOM/BAG3/ITGB2/CDK5R1/FYN/ANK3	13
celltypes.B cell.down	celltypes	B cell	down	BP	GO:0019852	L-ascorbic acid metabolic process	4/1232	11/14457	0.363636	4.26712	3.30841	0.0106352	0.114513	0.10048	GSTO1/SLC2A3/ERO1A/SELENON	4
celltypes.B cell.down	celltypes	B cell	down	BP	GO:0051493	regulation of cytoskeleton organization	57/1232	493/14457	0.115619	1.35674	2.45979	0.0109211	0.117113	0.102762	ARPC2/NPM1/TPR/NCK2/ACTG1/WDR1/SPTAN1/PFN1/FLNA/ABI2/ARHGEF18/RPS3/TGFB1/CDKN1B/RAC2/TMOD3/MYADM/CLIP1/ATXN7/CHMP3/ARAP2/DIAPH1/NCK1/PIK3R1/HAUS6/CCDC88C/CHMP7/EML3/ARFGEF1/BIN1/RHOF/CYLD/DSTN/CLN3/CDC42EP3/TBCD/TACC3/GMFG/EVL/ADD3/SH3BP1/RHPN1/CAPN2/PTGER4/STMN3/S100A10/HDGFL3/IQGAP2/CAMSAP2/LIMA1/SVIL/EPHA1/CDK5R1/FMN1/PXN/RGCC/KIF21A	57
celltypes.B cell.down	celltypes	B cell	down	BP	GO:0071456	cellular response to hypoxia	19/1232	127/14457	0.149606	1.75557	2.61026	0.0111068	0.118863	0.104297	P4HB/HIPK2/TGFB1/CDKN1B/FAM162A/HYOU1/NOTCH1/PDK1/CFLAR/ERO1A/CITED2/DNMT3A/BBC3/BNIP3/EPHA4/MYC/RORA/AQP3/RGCC	19
celltypes.B cell.down	celltypes	B cell	down	BP	GO:0071496	cellular response to external stimulus	12/1232	69/14457	0.173913	2.0408	2.64498	0.012989	0.133068	0.116762	CASP8AP2/TGFB1/FADD/HABP4/CASP8/PTGER4/BNIP3/IGF1R/FAS/BAG3/TNFRSF1A/TNFSF14	12
celltypes.B cell.down	celltypes	B cell	down	BP	GO:0034249	negative regulation of amide metabolic process	6/1232	24/14457	0.25	2.93364	2.89358	0.0133685	0.135119	0.118561	ABCA7/ORMDL1/SORL1/ORMDL3/BIN1/SPON1	6
celltypes.B cell.down	celltypes	B cell	down	BP	GO:0032963	collagen metabolic process	14/1232	86/14457	0.162791	1.91028	2.58412	0.0135404	0.136334	0.119627	SUCO/TGFB1/CTSB/NOTCH1/VIM/VSIR/ITGB1/FOSL2/RETREG1/MMP28/IL6R/RGCC/F2R/CTSL	14
celltypes.B cell.down	celltypes	B cell	down	BP	GO:0002418	immune response to tumor cell	7/1232	31/14457	0.225806	2.64974	2.80644	0.0136912	0.137068	0.120272	HLA-A/TGFB1/KLHL22/CD226/NKG7/PRF1/CRTAM	7
celltypes.B cell.down	celltypes	B cell	down	BP	GO:0010458	exit from mitosis	7/1232	31/14457	0.225806	2.64974	2.80644	0.0136912	0.137068	0.120272	RPL24/TGFB1/CDKN1B/CHMP7/CDC14A/NFIA/RGCC	7
celltypes.B cell.down	celltypes	B cell	down	BP	GO:0060416	response to growth hormone	7/1232	31/14457	0.225806	2.64974	2.80644	0.0136912	0.137068	0.120272	JAK1/STAT3/PIK3R1/STAT5B/JAK3/LEPROTL1/PXN	7
celltypes.B cell.down	celltypes	B cell	down	BP	GO:0045807	positive regulation of endocytosis	19/1232	130/14457	0.146154	1.71505	2.49956	0.014073	0.139902	0.122758	B2M/IL2RG/SOD1/ABCA7/CALR/BIN1/PPT1/CLN3/PTPRC/ARRB2/SMPD1/RAB27A/SYNE1/LYAR/PTPRJ/FCER1G/LDLRAP1/ARRB1/IL2RB	19
celltypes.B cell.down	celltypes	B cell	down	BP	GO:0006970	response to osmotic stress	13/1232	78/14457	0.166667	1.95576	2.58324	0.0140804	0.139902	0.122758	DDX3X/VPS13A/WNK1/CAB39/TSC22D4/SERPINB6/CLN3/PLK3/LRRC8A/ATP1A1/STK39/NINJ1/LRRC8C	13
celltypes.B cell.down	celltypes	B cell	down	BP	GO:0031665	negative regulation of lipopolysaccharide-mediated signaling pathway	4/1232	12/14457	0.333333	3.91153	3.07953	0.0148921	0.143921	0.126285	CARD8/PRDX2/SIGIRR/TNFAIP3	4
celltypes.B cell.down	celltypes	B cell	down	BP	GO:1901722	regulation of cell proliferation involved in kidney development	4/1232	12/14457	0.333333	3.91153	3.07953	0.0148921	0.143921	0.126285	CFLAR/MYC/IL6R/GATA3	4
celltypes.B cell.down	celltypes	B cell	down	BP	GO:1905897	regulation of response to endoplasmic reticulum stress	14/1232	87/14457	0.16092	1.88832	2.53649	0.0149122	0.143921	0.126285	NCK2/USP25/SERINC3/CREBRF/ABCA7/HYOU1/NCK1/PIK3R1/MANF/SVIP/HSPA5/XBP1/BBC3/ERN1	14
celltypes.B cell.down	celltypes	B cell	down	BP	GO:0007157	heterophilic cell-cell adhesion via plasma membrane cell adhesion molecules	8/1232	39/14457	0.205128	2.40709	2.68556	0.0154293	0.147206	0.129168	SELL/ITGAL/ITGA5/NECTIN3/AMIGO1/CD6/JAML/CRTAM	8
celltypes.B cell.down	celltypes	B cell	down	BP	GO:0009167	purine ribonucleoside monophosphate metabolic process	8/1232	39/14457	0.205128	2.40709	2.68556	0.0154293	0.147206	0.129168	ADSS2/GUK1/GMPS/APRT/NUDT2/AK3/CASK/MAGI3	8
celltypes.B cell.down	celltypes	B cell	down	BP	GO:0043547	positive regulation of GTPase activity	16/1232	105/14457	0.152381	1.78813	2.47381	0.0159451	0.151579	0.133005	RAP1A/LIMS1/RAPGEF6/ITGB1/NET1/SH3BP1/SEMA4D/DOCK10/S100A10/DOCK9/RASGRP1/EPHA1/TIAM1/RGS10/ITGA6/F2R	16
celltypes.B cell.down	celltypes	B cell	down	BP	GO:1902903	regulation of supramolecular fiber organization	43/1232	362/14457	0.118785	1.39389	2.31646	0.0162674	0.153787	0.134941	ARPC2/NCK2/ACTG1/WDR1/SPTAN1/PFN1/FLNA/ABI2/ARHGEF18/RPS3/CDKN1B/TMOD3/MYADM/CLIP1/ATXN7/NCK1/PIK3R1/HAUS6/CCDC88C/HSPA8/ARFGEF1/BIN1/DSTN/CDC42EP3/TBCD/GMFG/EVL/ADD3/SH3BP1/RHPN1/PTGER4/S100A10/HDGFL3/CAMSAP2/LIMA1/SVIL/EPHA1/CDK5R1/FMN1/LDLR/PXN/RGCC/KIF21A	43
celltypes.B cell.down	celltypes	B cell	down	BP	GO:0007189	adenylate cyclase-activating G protein-coupled receptor signaling pathway	18/1232	123/14457	0.146341	1.71726	2.43823	0.0163469	0.153787	0.134941	S1PR4/ADCY7/PDE3B/PDE4D/GNG2/PTGER4/NHERF1/ADGRL1/LPAR2/VIPR1/PRKAR1B/ATP2B4/PRKCA/CXCR3/GNAQ/ADGRG1/PTGER2/S1PR5	18
celltypes.B cell.down	celltypes	B cell	down	BP	GO:0045165	cell fate commitment	28/1232	216/14457	0.12963	1.52115	2.35532	0.0167383	0.156859	0.137637	JAK1/STAT3/RBPJ/SMAD2/NOTCH1/IL23A/CYLD/MCL1/LGALS1/JAK3/ITGB1/CHD3/ETS2/BATF/PRDM1/PTCH1/IL6ST/RUNX2/IL6R/TBX21/BCL11B/TOX/NFIA/SPN/CTSL/EOMES/GATA3/ID2	28
celltypes.B cell.down	celltypes	B cell	down	BP	GO:1902806	regulation of cell cycle G1/S phase transition	23/1232	169/14457	0.136095	1.59701	2.38272	0.0167984	0.157142	0.137886	DDX3X/FBXW7/TMEM14B/JADE1/CRLF3/CTDSP2/CDKN1B/PHF10/TMSB4X/PLK3/RBL2/CCND3/APBB1/PRMT2/DGKZ/CCND2/CDKN2C/ATP2B4/PLCB1/AIF1/RGCC/ANXA1/ID2	23
celltypes.B cell.down	celltypes	B cell	down	BP	GO:0042491	inner ear auditory receptor cell differentiation	8/1232	40/14457	0.2	2.34692	2.60354	0.0178878	0.165282	0.145028	REST/SOD1/RBPJ/NOTCH1/SLC4A7/KCNQ1/NHERF1/MYO6	8
celltypes.B cell.down	celltypes	B cell	down	BP	GO:1900026	positive regulation of substrate adhesion-dependent cell spreading	8/1232	40/14457	0.2	2.34692	2.60354	0.0178878	0.165282	0.145028	ARPC2/P4HB/FLNA/CALR/MYADM/LIMS1/UNC13D/S100A10	8
celltypes.B cell.down	celltypes	B cell	down	BP	GO:1904951	positive regulation of establishment of protein localization	36/1232	295/14457	0.122034	1.43202	2.28813	0.0180835	0.166507	0.146103	TPR/UBL5/VAMP2/FBXW7/USP36/FLNA/ANP32B/SORL1/TGFB1/RAC2/CNST/TOMM7/PIK3R1/ATG13/ZFAND1/CLN3/PLK3/LRRC8A/C2CD2L/TCAF2/XBP1/APBB1/BBC3/STOM/NLGN2/BAG3/ITGB2/CDK5R1/FYN/ANK3/AKAP5/PLCB1/PRKCA/GPR68/PRR5L/GZMB	36
celltypes.B cell.down	celltypes	B cell	down	BP	GO:0002440	production of molecular mediator of immune response	27/1232	208/14457	0.129808	1.52324	2.31991	0.0182553	0.167504	0.146978	HLA-F/B2M/HLA-E/IL2RG/RIF1/HLA-A/ARID5A/TGFB1/RNF168/HK1/SMAD7/PTPRC/LITAF/JAK3/IL27RA/XBP1/NDFIP1/BATF/SAMHD1/TBX21/CD96/CD226/CD28/IL18R1/CD7/GATA3/CD40LG	27
celltypes.B cell.down	celltypes	B cell	down	BP	GO:0050817	coagulation	27/1232	208/14457	0.129808	1.52324	2.31991	0.0182553	0.167504	0.146978	ACTG1/FLNA/PRDX2/AK3/LNPK/RAP2B/ENPP4/DGKE/RAB27A/DGKA/RASA3/PAFAH2/DGKH/DGKZ/PTPRJ/IL6ST/STXBP1/ADTRP/FCER1G/LCK/IL6R/PRKCA/F2R/UBASH3B/GNAQ/PRKCQ/CD40LG	27
celltypes.B cell.down	celltypes	B cell	down	BP	GO:0006979	response to oxidative stress	43/1232	365/14457	0.117808	1.38243	2.25862	0.0184997	0.169452	0.148687	TXNIP/PSIP1/USP25/SOD1/PYCR2/STK26/HM13/RPS3/ARL6IP5/NDUFA12/PRDX2/RWDD1/NUDT2/ERCC6L2/RIPK1/ATM/PLEKHA1/SESN1/PYROXD1/KEAP1/PLK3/RGS14/ERO1A/SELENON/FXN/AGAP3/TRIM32/NET1/XBP1/HMOX2/CAPN2/ERMP1/NCOA7/BMAL1/BNIP3/TNFAIP3/ERN1/FYN/IPCEF1/AIF1/PXN/PRR5L/FBLN5	43
celltypes.B cell.down	celltypes	B cell	down	BP	GO:0033002	muscle cell proliferation	24/1232	180/14457	0.133333	1.56461	2.32647	0.0186576	0.170307	0.149437	PIM1/RBPJ/TGFB1/CDKN1B/DNMT1/PDCD4/NOTCH1/PIK3R1/CFLAR/SKI/SELENON/XBP1/NDRG2/CITED2/IGF1R/TNFAIP3/ERN1/IL6R/LDLRAP1/AIF1/CCL5/NOG/ID2/TGFBR3	24
celltypes.B cell.down	celltypes	B cell	down	BP	GO:0097284	hepatocyte apoptotic process	5/1232	19/14457	0.263158	3.08805	2.77968	0.0188608	0.170979	0.150027	STK4/CFLAR/CASP6/DNMT3A/IGF1R	5
celltypes.B cell.down	celltypes	B cell	down	BP	GO:0007628	adult walking behavior	6/1232	26/14457	0.230769	2.70798	2.66044	0.019765	0.17344	0.152186	HIPK2/AGTPBP1/NPC1/ARRB2/FXN/EPHA4	6
celltypes.B cell.down	celltypes	B cell	down	BP	GO:0035640	exploration behavior	6/1232	26/14457	0.230769	2.70798	2.66044	0.019765	0.17344	0.152186	VPS13A/CRBN/NLGN2/ABTB3/DPP4/NOG	6
celltypes.B cell.down	celltypes	B cell	down	BP	GO:2000737	negative regulation of stem cell differentiation	6/1232	26/14457	0.230769	2.70798	2.66044	0.019765	0.17344	0.152186	REST/N4BP2L2/STAT3/LBH/NOTCH1/TMSB4X	6
celltypes.B cell.down	celltypes	B cell	down	BP	GO:0097305	response to alcohol	28/1232	219/14457	0.127854	1.50031	2.27703	0.0197893	0.17344	0.152186	EEF1B2/RPL10A/RPL27/XRN1/SOD1/SMAD2/CPT1A/TGFB1/BIRC2/ADCY7/CASP8/PTPRC/GNG2/ABCA2/GRAMD1A/DNMT3A/PTGER4/CD27/STK39/FKBP5/IGF1R/PTCH1/FYN/CCR5/GNAQ/GATA3/TGFBR3/PTGER2	28
celltypes.B cell.down	celltypes	B cell	down	BP	GO:0042983	amyloid precursor protein biosynthetic process	4/1232	13/14457	0.307692	3.61064	2.87413	0.0200856	0.17344	0.152186	ABCA7/ITM2B/ABCA2/ITM2A	4
celltypes.B cell.down	celltypes	B cell	down	BP	GO:0061684	chaperone-mediated autophagy	4/1232	13/14457	0.307692	3.61064	2.87413	0.0200856	0.17344	0.152186	EEF1A1/HSPA8/CTSA/PLK3	4
celltypes.B cell.down	celltypes	B cell	down	BP	GO:0070278	extracellular matrix constituent secretion	4/1232	13/14457	0.307692	3.61064	2.87413	0.0200856	0.17344	0.152186	NOTCH1/ADTRP/RGCC/TNFRSF1A	4
celltypes.B cell.down	celltypes	B cell	down	BP	GO:1901334	lactone metabolic process	4/1232	13/14457	0.307692	3.61064	2.87413	0.0200856	0.17344	0.152186	GSTO1/SLC2A3/ERO1A/SELENON	4
celltypes.B cell.down	celltypes	B cell	down	BP	GO:0045667	regulation of osteoblast differentiation	16/1232	108/14457	0.148148	1.73846	2.35103	0.0204245	0.175425	0.153928	DDX5/REST/SUCO/NOTCH1/NBR1/SKI/TOB1/SEMA4D/PTCH1/IL6ST/ACVR2B/IFITM1/RUNX2/IL6R/NOG/CEBPD	16
celltypes.B cell.down	celltypes	B cell	down	BP	GO:0032964	collagen biosynthetic process	8/1232	41/14457	0.195122	2.28967	2.52395	0.0206148	0.175425	0.153928	SUCO/TGFB1/NOTCH1/VIM/FOSL2/IL6R/RGCC/F2R	8
celltypes.B cell.down	celltypes	B cell	down	BP	GO:0043300	regulation of leukocyte degranulation	8/1232	41/14457	0.195122	2.28967	2.52395	0.0206148	0.175425	0.153928	HLA-F/RAC2/CD84/UNC13D/ITGB2/STXBP1/CD300A/KLRC2	8
celltypes.B cell.down	celltypes	B cell	down	BP	GO:0071383	cellular response to steroid hormone stimulus	24/1232	182/14457	0.131868	1.54742	2.26828	0.0210677	0.177278	0.155554	DDX5/REST/NCOA1/URI1/CALR/TGFB1/RWDD1/LBH/CNOT2/KDM3A/HSPA8/CRY1/CFLAR/NPC1/NR3C2/PAQR8/ATP1A1/FBXO32/PRMT2/BMAL1/IGF1R/ADTRP/TRERF1/ANXA1	24
celltypes.B cell.down	celltypes	B cell	down	BP	GO:0030336	negative regulation of cell migration	33/1232	270/14457	0.122222	1.43423	2.19829	0.0224055	0.186585	0.16372	OSBPL8/STAT3/STK26/CALR/TGFB1/NOTCH1/RAP2B/OGT/SMAD7/LDLRAD4/EVL/IL27RA/CITED2/PTGER4/NHERF1/EPHA4/PTPRJ/TIMP1/ATP2B4/EPHA1/ADTRP/IFITM1/MMP28/PLCB1/CD300A/AIF1/KLRK1/RGCC/DPP4/NOG/CX3CR1/ADGRG1/TGFBR3	33
celltypes.B cell.down	celltypes	B cell	down	BP	GO:0060323	head morphogenesis	7/1232	34/14457	0.205882	2.41594	2.52284	0.0224213	0.186585	0.16372	TIPARP/TGFB1/PLEKHA1/SKI/SSBP3/LEF1/NOG	7
celltypes.B cell.down	celltypes	B cell	down	BP	GO:0035455	response to interferon-alpha	5/1232	20/14457	0.25	2.93364	2.6411	0.0234269	0.191815	0.16831	TPR/MX2/IFITM1/PYHIN1/GATA3	5
celltypes.B cell.down	celltypes	B cell	down	BP	GO:0046626	regulation of insulin receptor signaling pathway	10/1232	58/14457	0.172414	2.0232	2.38309	0.0235525	0.191815	0.16831	NUCKS1/OSBPL8/SORL1/NCK1/OGT/PIP4K2A/CTSD/PTPRE/PTPRJ/PRKCQ	10
celltypes.B cell.down	celltypes	B cell	down	BP	GO:0043001	Golgi to plasma membrane protein transport	8/1232	42/14457	0.190476	2.23516	2.44665	0.023624	0.191815	0.16831	GOLGA4/VAMP2/CNST/GOLGA7/MACF1/CLN3/OPTN/ANK3	8
celltypes.B cell.down	celltypes	B cell	down	BP	GO:0008360	regulation of cell shape	18/1232	128/14457	0.140625	1.65018	2.25506	0.0236941	0.192028	0.168497	MYL12B/BRWD1/WDR1/ARHGEF18/ARHGAP15/RAC2/DIAPH1/CDC42SE1/CDC42SE2/PRAG1/CDC42EP3/FGD3/SEMA4D/NHERF1/ITGB2/FYN/ATP10A/ANXA1	18
celltypes.B cell.down	celltypes	B cell	down	BP	GO:0006612	protein targeting to membrane	16/1232	110/14457	0.145455	1.70685	2.27129	0.023904	0.193135	0.169468	TRAM1/NACA/SEC61G/ZDHHC3/SSR2/GOLGA7/HSPA5/ZDHHC18/TCAF2/PRKCI/SGTB/STOM/ITGB2/CDK5R1/FYN/ANK3	16
celltypes.B cell.down	celltypes	B cell	down	BP	GO:1904018	positive regulation of vasculature development	20/1232	147/14457	0.136054	1.59654	2.21876	0.0246225	0.19773	0.1735	JAK1/WNK1/STAT3/HIPK2/TGFB1/PIK3CD/HIPK1/ERAP1/ITGB1/ETS1/XBP1/PLCG1/NINJ1/ITGB2/ITGA5/EPHA1/PRKCA/TMIGD2/CXCR3/CX3CR1	20
celltypes.B cell.down	celltypes	B cell	down	BP	GO:0042742	defense response to bacterium	26/1232	204/14457	0.127451	1.49558	2.17576	0.0249259	0.199558	0.175104	B2M/HLA-E/HLA-A/RBPJ/TAB2/RPL30/NLRP1/ZNFX1/IL23A/GBP2/RNF213/GBP1/GBP5/LTA/IL27RA/GBP3/OPTN/FCER1G/TNFSF8/IL6R/IL7R/SPN/KLRK1/TNFRSF1A/CD4/GNLY	26
celltypes.B cell.down	celltypes	B cell	down	BP	GO:0097581	lamellipodium organization	13/1232	84/14457	0.154762	1.81607	2.2894	0.0249738	0.199639	0.175175	ARPC2/CD44/NCK2/CAPZB/ABI2/RAC2/ARHGEF6/NCK1/PIK3R1/ABLIM1/ITGB1/AUTS2/SPATA13	13
celltypes.B cell.down	celltypes	B cell	down	BP	GO:0060759	regulation of response to cytokine stimulus	22/1232	166/14457	0.13253	1.55519	2.1958	0.0250596	0.199974	0.175469	TLE5/USP25/TMC8/CARD8/FADD/HIPK1/RIPK1/CYLD/CASP8/PTPRC/RFFL/TRIM32/SIGIRR/TNFAIP3/IL6ST/IKBKE/SAMHD1/TXK/TNFRSF1A/CCL5/STING1/GFI1	22
celltypes.B cell.down	celltypes	B cell	down	BP	GO:0051098	regulation of binding	24/1232	185/14457	0.12973	1.52232	2.1823	0.0251294	0.199974	0.175469	RPL11/TLE5/B2M/TMC8/EIF3E/ITGA4/SMAD2/HIPK2/HABP4/EPB41/SKI/STYX/H1-0/AKTIP/EPHA4/TIAM1/LDLRAP1/LEF1/NOG/STING1/IL32/PYHIN1/GATA3/GZMA	24
celltypes.B cell.down	celltypes	B cell	down	BP	GO:0110053	regulation of actin filament organization	30/1232	243/14457	0.123457	1.44871	2.15301	0.0251973	0.200213	0.175678	ARPC2/NCK2/ACTG1/WDR1/SPTAN1/PFN1/FLNA/ABI2/ARHGEF18/TMOD3/MYADM/NCK1/PIK3R1/ARFGEF1/BIN1/DSTN/CDC42EP3/GMFG/EVL/ADD3/SH3BP1/RHPN1/PTGER4/S100A10/LIMA1/SVIL/EPHA1/FMN1/PXN/RGCC	30
celltypes.B cell.down	celltypes	B cell	down	BP	GO:0042327	positive regulation of phosphorylation	45/1232	393/14457	0.114504	1.34365	2.10812	0.025381	0.201323	0.176652	STK4/DDX3X/FBXW7/PIM1/TAB2/ARL2BP/RPS3/RAP1A/TGFB1/CALM3/CAB39/PIBF1/RIPK1/AGAP2/ATG14/CREBL2/CALM1/PTPRC/PIK3R5/CCND3/XBP1/SEMA4D/AKTIP/EPHA4/PTPRJ/CCND2/FAS/ERN1/TNIK/ITGA5/RASGRP1/ADTRP/NIBAN1/IL6R/ITGA6/LAT/YES1/ARRB1/LCP2/CD3E/RGCC/CCL5/FNIP2/CD4/SLCO3A1	45
celltypes.B cell.down	celltypes	B cell	down	BP	GO:0007599	hemostasis	27/1232	214/14457	0.126168	1.48053	2.16152	0.0254134	0.201323	0.176652	ACTG1/FLNA/PRDX2/AK3/LNPK/RAP2B/ENPP4/DGKE/RAB27A/DGKA/RASA3/PAFAH2/DGKH/DGKZ/PTPRJ/IL6ST/STXBP1/ADTRP/FCER1G/LCK/IL6R/PRKCA/F2R/UBASH3B/GNAQ/PRKCQ/CD40LG	27
celltypes.B cell.down	celltypes	B cell	down	BP	GO:0001501	skeletal system development	49/1232	434/14457	0.112903	1.32487	2.09734	0.025563	0.201743	0.177022	CD44/TLE5/FBXW7/RPL13/RPL38/TIPARP/ARID5A/SMAD2/PBXIP1/TGFB1/RUNX3/PPIB/DYNC2I1/GLG1/RPS6KA3/CSGALNACT1/LNPK/PLEKHA1/SBDS/SMAD7/PTPRC/SKI/NFATC2/ETS2/ANKH/THRA/LTBP3/RDH10/SEMA4D/CITED2/PTGER4/FOSL2/HAPLN3/HOXB2/TIMP1/ACVR2B/MAP2K6/RUNX2/FMN1/RFLNB/NFIA/MAF/DHRS3/SPEF2/PCSK5/NOG/GPR68/GATA3/TYROBP	49
celltypes.B cell.down	celltypes	B cell	down	BP	GO:0036503	ERAD pathway	16/1232	111/14457	0.144144	1.69147	2.23204	0.0258025	0.201743	0.177022	CANX/MAN1A2/USP25/HM13/UBE4A/STT3B/CALR/UBAC2/EDEM3/HSP90B1/SVIP/SDF2L1/HSPA5/FAM8A1/XBP1/MAN1C1	16
celltypes.B cell.down	celltypes	B cell	down	BP	GO:0071222	cellular response to lipopolysaccharide	23/1232	176/14457	0.130682	1.5335	2.1734	0.0258871	0.201743	0.177022	B2M/CARD8/ARID5A/PRDX2/PDCD4/GBP2/PTPN22/LITAF/SBNO2/VIM/GBP5/XBP1/PLSCR3/CAPN2/GBP3/SIGIRR/TNFAIP3/CD6/KLRK1/PRKCA/CCR5/CX3CR1/GFI1	23
celltypes.B cell.down	celltypes	B cell	down	BP	GO:0001771	immunological synapse formation	4/1232	14/14457	0.285714	3.35274	2.68807	0.0262631	0.201743	0.177022	NCK2/LGALS3/CD6/PRF1	4
celltypes.B cell.down	celltypes	B cell	down	BP	GO:0001829	trophectodermal cell differentiation	4/1232	14/14457	0.285714	3.35274	2.68807	0.0262631	0.201743	0.177022	CNOT2/CITED2/HOPX/EOMES	4
celltypes.B cell.down	celltypes	B cell	down	BP	GO:0002544	chronic inflammatory response	4/1232	14/14457	0.285714	3.35274	2.68807	0.0262631	0.201743	0.177022	UNC13D/LTA/TNFAIP3/CCL5	4
celltypes.B cell.down	celltypes	B cell	down	BP	GO:0010649	regulation of cell communication by electrical coupling	4/1232	14/14457	0.285714	3.35274	2.68807	0.0262631	0.201743	0.177022	CALM3/CALM1/PDE4D/ANK3	4
celltypes.B cell.down	celltypes	B cell	down	BP	GO:0010950	positive regulation of endopeptidase activity	4/1232	14/14457	0.285714	3.35274	2.68807	0.0262631	0.201743	0.177022	STAT3/MBP/VSIR/EPHA4	4
celltypes.B cell.down	celltypes	B cell	down	BP	GO:0034333	adherens junction assembly	4/1232	14/14457	0.285714	3.35274	2.68807	0.0262631	0.201743	0.177022	ABI2/HIPK1/SMAD7/TBCD	4
celltypes.B cell.down	celltypes	B cell	down	BP	GO:0042159	lipoprotein catabolic process	4/1232	14/14457	0.285714	3.35274	2.68807	0.0262631	0.201743	0.177022	ATM/PPT1/CTSD/LDLR	4
celltypes.B cell.down	celltypes	B cell	down	BP	GO:0071679	commissural neuron axon guidance	4/1232	14/14457	0.285714	3.35274	2.68807	0.0262631	0.201743	0.177022	PTCH1/ROBO3/NELL2/NCAM1	4
celltypes.B cell.down	celltypes	B cell	down	BP	GO:2000136	regulation of cell proliferation involved in heart morphogenesis	4/1232	14/14457	0.285714	3.35274	2.68807	0.0262631	0.201743	0.177022	NACA/PIM1/RBPJ/NOTCH1	4
celltypes.B cell.down	celltypes	B cell	down	BP	GO:0043303	mast cell degranulation	8/1232	43/14457	0.186047	2.18318	2.3715	0.0269284	0.205904	0.180673	PIK3CD/RAC2/CD84/UNC13D/STXBP1/RASGRP1/LAT/CD300A	8
celltypes.B cell.down	celltypes	B cell	down	BP	GO:0002832	negative regulation of response to biotic stimulus	17/1232	121/14457	0.140496	1.64866	2.18689	0.0275955	0.210092	0.184348	HLA-F/PIM1/HLA-E/HLA-A/CARD8/TGFB1/PRDX2/ZDHHC18/ARRB2/LYAR/NLRC3/SIGIRR/TNFAIP3/SAMHD1/CD96/KLRD1/TIGIT	17
celltypes.B cell.down	celltypes	B cell	down	BP	GO:0003281	ventricular septum development	11/1232	68/14457	0.161765	1.89824	2.26602	0.027938	0.211142	0.185268	RBPJ/AP2B1/NOTCH1/LUZP1/SMAD7/HEG1/CITED2/PRDM1/NOG/GATA3/TGFBR3	11
celltypes.B cell.down	celltypes	B cell	down	BP	GO:0034446	substrate adhesion-dependent cell spreading	14/1232	95/14457	0.147368	1.72931	2.17669	0.0300359	0.221326	0.194204	ARPC2/P4HB/FLNA/ITGA4/CALR/MYADM/PIK3R1/GBP1/LIMS1/ITGB7/UNC13D/S100A10/EPHA1/PXN	14
celltypes.B cell.down	celltypes	B cell	down	BP	GO:0051055	negative regulation of lipid biosynthetic process	9/1232	52/14457	0.173077	2.03098	2.27315	0.0301471	0.221836	0.194652	REST/FBXW7/DCAF5/ORMDL1/ORMDL3/PIBF1/ATP1A1/ABCA2/GFI1	9
celltypes.B cell.down	celltypes	B cell	down	BP	GO:0140632	canonical inflammasome complex assembly	8/1232	44/14457	0.181818	2.13356	2.2984	0.0305401	0.223829	0.196401	DDX3X/CARD8/NLRP1/HSPA8/PTPN22/GBP5/KCNK6/NLRC3	8
celltypes.B cell.down	celltypes	B cell	down	BP	GO:0071559	response to transforming growth factor beta	30/1232	247/14457	0.121457	1.42525	2.05745	0.030615	0.224029	0.196576	SNX6/STAT3/SMAD2/HIPK2/TGFB1/RUNX3/SMURF2/GLG1/CFLAR/OGT/SMAD7/LIMS1/ERO1A/HSPA5/SKI/SELENON/ARRB2/LDLRAD4/XBP1/LTBP3/CITED2/GIPC1/ZYX/BCL9L/IGF1R/FYN/YES1/PXN/CX3CR1/TGFBR3	30
celltypes.B cell.down	celltypes	B cell	down	BP	GO:0046598	positive regulation of viral entry into host cell	4/1232	15/14457	0.266667	3.12922	2.51817	0.0334568	0.239509	0.210159	P4HB/LGALS1/SMPD1/CD4	4
celltypes.B cell.down	celltypes	B cell	down	BP	GO:0075294	positive regulation by symbiont of entry into host	4/1232	15/14457	0.266667	3.12922	2.51817	0.0334568	0.239509	0.210159	P4HB/LGALS1/SMPD1/CD4	4
celltypes.B cell.down	celltypes	B cell	down	BP	GO:0019216	regulation of lipid metabolic process	33/1232	279/14457	0.11828	1.38796	1.99717	0.0338657	0.241954	0.212305	REST/FBXW7/DCAF5/ABCA7/ORMDL1/SORL1/CPT1A/ORMDL3/PIBF1/ATG14/CREBL2/PDK1/OGT/RNF213/STAT5B/PDE3B/ATP1A1/XBP1/THRA/RDH10/ABCA2/CAPN2/TTC39B/IGF1R/ABCD2/RORA/LDLRAP1/EPHX2/BCL11B/LDLR/TNFRSF1A/GFI1/ID2	33
celltypes.B cell.down	celltypes	B cell	down	BP	GO:0071216	cellular response to biotic stimulus	26/1232	210/14457	0.12381	1.45285	2.01761	0.0342057	0.243389	0.213564	TXNIP/B2M/CARD8/ARID5A/PRDX2/PDCD4/NOTCH1/GBP2/PTPN22/HSPA5/LITAF/SBNO2/VIM/GBP5/XBP1/PLSCR3/CAPN2/GBP3/SIGIRR/TNFAIP3/CD6/KLRK1/PRKCA/CCR5/CX3CR1/GFI1	26
celltypes.B cell.down	celltypes	B cell	down	BP	GO:0052548	regulation of endopeptidase activity	8/1232	45/14457	0.177778	2.08615	2.22723	0.0344705	0.243389	0.213564	STAT3/MBP/SERPINB6/BIN1/VSIR/SPOCK2/EPHA4/TIMP1	8
celltypes.B cell.down	celltypes	B cell	down	BP	GO:0032528	microvillus organization	5/1232	22/14457	0.227273	2.66695	2.38812	0.0345523	0.243389	0.213564	FXYD5/STK26/RAPGEF6/NHERF1/TNIK	5
celltypes.B cell.down	celltypes	B cell	down	BP	GO:0060142	regulation of syncytium formation by plasma membrane fusion	5/1232	22/14457	0.227273	2.66695	2.38812	0.0345523	0.243389	0.213564	CFLAR/NFATC2/CAPN2/TNFSF14/TYROBP	5
celltypes.B cell.down	celltypes	B cell	down	BP	GO:0070168	negative regulation of biomineral tissue development	5/1232	22/14457	0.227273	2.66695	2.38812	0.0345523	0.243389	0.213564	TGFB1/NOTCH1/LTBP3/SRGN/RFLNB	5
celltypes.B cell.down	celltypes	B cell	down	BP	GO:1902018	negative regulation of cilium assembly	5/1232	22/14457	0.227273	2.66695	2.38812	0.0345523	0.243389	0.213564	ODF2L/LUZP1/MPHOSPH9/TRIM32/LIMA1	5
celltypes.B cell.down	celltypes	B cell	down	BP	GO:0071560	cellular response to transforming growth factor beta stimulus	29/1232	240/14457	0.120833	1.41793	1.99267	0.0350785	0.245782	0.215664	SNX6/STAT3/SMAD2/HIPK2/TGFB1/SMURF2/GLG1/CFLAR/OGT/SMAD7/LIMS1/ERO1A/HSPA5/SKI/SELENON/ARRB2/LDLRAD4/XBP1/LTBP3/CITED2/GIPC1/ZYX/BCL9L/IGF1R/FYN/YES1/PXN/CX3CR1/TGFBR3	29
celltypes.B cell.down	celltypes	B cell	down	BP	GO:1903036	positive regulation of response to wounding	10/1232	62/14457	0.16129	1.89267	2.14988	0.035753	0.249514	0.218938	ACTG1/FLNA/PRDX2/ARFGEF1/ENPP4/ITGB1/XBP1/IGF1R/F2R/ANXA1	10
celltypes.B cell.down	celltypes	B cell	down	CC	GO:0022626	cytosolic ribosome	56/1275	110/15236	0.509091	6.08354	16.1703	1.72143e-31	1.10344e-28	9.5494e-29	RPL17/RPS10/RPL12/RPS16/RPL19/RPL26/UBA52/RPS18/RPL23A/RPS6/EEF1A1/RPL11/RPS13/RPL10A/RPL37/RPS27/RPL29/RPS15/DDX3X/RPL13A/RPS21/RPL9/RPL36A/RPS12/RPS2/RPL27/RPL10/RPL22/RPL4/RPL7/RPS28/RPS27A/RPL32/RPL13/RPL3/RPL27A/RPL36/RPL21/RPL31/RPS29/RPL24/RPL34/RPL14/RPL36AL/RPL38/RPS25/RPS3A/RPS4X/RPL30/RPS24/EIF2A/RPS14/RPL35A/RPS15A/RPS3/RPS26	56
celltypes.B cell.down	celltypes	B cell	down	CC	GO:0005925	focal adhesion	79/1275	410/15236	0.192683	2.30252	8.07948	1.29003e-12	1.37819e-10	1.19272e-10	RPS10/RPL12/RPS16/RPL19/RPS18/ARPC2/RPS13/NPM1/RPL10A/CD44/RPS15/JAK1/RPL13A/RPL9/HMGA1/CD46/RPS2/RPL27/PABPC1/RPL22/RPL4/B2M/RPL7/ACTG1/RPL3/IL16/RPL31/RPS29/P4HB/RPL38/RPS3A/PFN1/RPS4X/FLNA/RPL30/ITGA4/RPS14/RPS3/CALR/TES/RAC2/PTPRA/HSP90B1/PPIB/REXO2/HYOU1/CASK/HSPA8/LMO7/CD99/FOCAD/LIMS1/ITGB7/PTPRC/PRAG1/HSPA5/VIM/ARHGAP26/SYNE2/FLNB/ITGB1/EVL/AHNAK/CAPN2/ZYX/SNTB1/ITGB2/ITGA5/LIMA1/SVIL/FBL…	79
celltypes.B cell.down	celltypes	B cell	down	CC	GO:0042101	T cell receptor complex	11/1275	16/15236	0.6875	8.21549	8.72643	3.98475e-09	2.55422e-07	2.21049e-07	SKAP1/CD6/ZAP70/CD3E/CD8B/CD247/CD3G/CD3D/CD4/CD8A/TRAT1	11
celltypes.B cell.down	celltypes	B cell	down	CC	GO:0009897	external side of plasma membrane	59/1275	322/15236	0.18323	2.18956	6.51982	6.87304e-09	4.00511e-07	3.46611e-07	HLA-C/HLA-F/B2M/P4HB/HLA-E/IL2RG/HLA-A/ITGA4/SELL/CALR/ABCB1/CTSB/BTN3A3/CD84/PTPRC/BTN3A2/BTN3A1/ITGB1/IL11RA/HEG1/CAPN2/CD27/ITGAL/FAS/MFGE8/IL6ST/ITGB2/ITGA5/FCER1G/CD5/IL6R/ITGA6/ITGA1/IL7R/LDLR/CD3E/SPN/KLRK1/CCR5/KLRC2/CD3G/CD3D/CD226/CXCR3/CD28/KLRD1/CD4/CD2/CX3CR1/CD8A/FCRL6/KLRC3/TGFBR3/CCR4/IL2RB/NCAM1/CD40LG/FCGR3A/FASLG	59
celltypes.B cell.down	celltypes	B cell	down	CC	GO:0045121	membrane raft	46/1275	254/15236	0.181102	2.16414	5.65398	4.44532e-07	2.37454e-05	2.05499e-05	CD48/MYADM/SMURF2/RAP2B/HK1/PPT1/CLN3/PTPRC/SYNJ2/NPC1/ITGB1/ATP1A1/CTSD/KCNQ1/EFHD2/AHNAK/CAPN2/EEIG1/STOM/S100A10/SKAP1/PAG1/IGF1R/FAS/PTCH1/LDHB/IL6ST/ITGB2/ATP2B4/FYN/ADTRP/LCK/AKAP5/LAT/ZAP70/LCP2/SELPLG/TNFRSF1A/CD226/F2R/DPP4/MAL/CD4/CD8A/ADGRG1/FASLG	46
celltypes.B cell.down	celltypes	B cell	down	CC	GO:0098562	cytoplasmic side of membrane	35/1275	190/15236	0.184211	2.20128	5.03534	6.99127e-06	0.0003201	0.000277022	EEF1A1/JAK1/RPL27/RPS28/RPS29/CYTH1/HM13/KCNAB2/AP2B1/RPS26/BIRC2/FADD/AP2A2/CHMP7/EPB41/CDIP1/TRADD/CYLD/PTPN22/PTPRC/LITAF/JAK3/C2CD2L/RASAL3/S100A6/GNG2/ESYT2/RASA3/PTPN4/PTPN7/AKAP5/LDLRAP1/OTULINL/GNAQ/CD2	35
celltypes.B cell.down	celltypes	B cell	down	CC	GO:0001772	immunological synapse	14/1275	47/15236	0.297872	3.55952	5.3108	1.88585e-05	0.000805887	0.000697434	LGALS3/SKAP1/PTPRJ/LCK/CD6/LAT/ZAP70/CD3E/CD28/PRKCQ/PRF1/CRTAM/GZMB/GZMA	14
celltypes.B cell.down	celltypes	B cell	down	CC	GO:0044194	cytolytic granule	7/1275	14/15236	0.5	5.9749	5.6277	5.73276e-05	0.00216159	0.00187069	CALR/SRGN/NKG7/PRF1/GZMH/GNLY/GZMB	7
celltypes.B cell.down	celltypes	B cell	down	CC	GO:0034663	endoplasmic reticulum chaperone complex	6/1275	11/15236	0.545455	6.51807	5.53252	0.000108495	0.00386364	0.00334368	P4HB/HSP90B1/PPIB/HYOU1/SDF2L1/HSPA5	6
celltypes.B cell.down	celltypes	B cell	down	CC	GO:0043235	receptor complex	50/1275	352/15236	0.142045	1.69742	4.00056	0.000148363	0.00475504	0.00411513	CD44/B2M/IL2RG/FLNA/ITGA4/PTPRA/BIRC2/RIPK1/NOTCH1/NBR1/TRADD/ITGB7/STXBP5/NR3C2/ITGB1/IL11RA/SEMA4D/ITGAL/BMAL1/SKAP1/IGF1R/IL6ST/ITGB2/TRAF1/ITGA5/ACVR2B/VIPR1/EPHA1/LIME1/CD6/IL6R/ITGA6/ITGA1/LDLR/ZAP70/CD3E/CD8B/CD247/KLRC2/CD3G/TNFRSF1A/CD3D/KLRD1/IL18R1/CD4/CD8A/TRAT1/KLRC3/TGFBR3/IL2RB	50
celltypes.B cell.down	celltypes	B cell	down	CC	GO:0030667	secretory granule membrane	42/1275	287/15236	0.146341	1.74875	3.86982	0.000257345	0.00785514	0.00679803	CD44/HLA-C/CD46/VAMP2/TBC1D10C/ATP11B/KCNAB2/SELL/RAP1A/ORMDL3/DNAJC5/DIAPH1/SLC2A3/AP2A2/RAP1B/AP1M1/TMEM63A/SURF4/RAP2B/STK10/SVIP/SERPINB6/ENPP4/RHOF/PTPRC/STXBP5/LGALS3/HMOX2/ITGAL/NBEAL2/STOM/TSPAN14/PTPRJ/MFGE8/CYB561/ITGB2/PHACTR2/IQGAP2/FCER1G/CD300A/STING1/TYROBP	42
celltypes.B cell.down	celltypes	B cell	down	CC	GO:0031252	cell leading edge	55/1275	409/15236	0.134474	1.60694	3.76011	0.00029827	0.00869051	0.00752097	ARPC2/EEF1A1/CD44/DDX3X/PABPC1/SLK/CAPZB/P4HB/ABCA7/ABI2/WIPF1/RPS3/SAMSN1/RAC2/MYADM/CLIP1/ARHGEF6/DIAPH1/ARHGAP45/JMY/PLEKHA1/CASP8/ABLIM1/MACF1/VIM/SH3YL1/SYNE2/S100A6/ITGB1/EVL/FGD3/SH3BP1/PRKCI/APBB1/PSTPIP1/NHERF1/DGKZ/MYO6/PLCG1/PTPRJ/S100A11/PDE9A/ITGA5/IQGAP2/LIMA1/AAK1/THEM4/TIAM1/AKAP5/SPATA13/AIF1/PXN/ACTN1/DPP4/S100B	55
celltypes.B cell.down	celltypes	B cell	down	CC	GO:0001726	ruffle	29/1275	184/15236	0.157609	1.88339	3.64321	0.00067022	0.0179005	0.0154915	EEF1A1/ABCA7/WIPF1/RPS3/SAMSN1/MYADM/CLIP1/DIAPH1/ARHGAP45/PLEKHA1/MACF1/SH3YL1/S100A6/ITGB1/FGD3/NHERF1/MYO6/PLCG1/PTPRJ/S100A11/PDE9A/ITGA5/LIMA1/THEM4/TIAM1/SPATA13/AIF1/ACTN1/S100B	29
celltypes.B cell.down	celltypes	B cell	down	CC	GO:0098576	lumenal side of membrane	10/1275	39/15236	0.25641	3.06405	3.90025	0.00108782	0.0278917	0.0241382	HLA-C/CANX/HLA-F/HLA-E/HLA-A/HM13/CALR/HSPA8/CTSA/KCNQ1	10
celltypes.B cell.down	celltypes	B cell	down	CC	GO:0032587	ruffle membrane	18/1275	100/15236	0.18	2.15096	3.48959	0.00149014	0.0367377	0.0317937	EEF1A1/ABCA7/RPS3/DIAPH1/ARHGAP45/PLEKHA1/MACF1/SH3YL1/ITGB1/MYO6/PLCG1/PTPRJ/PDE9A/ITGA5/THEM4/TIAM1/SPATA13/AIF1	18
celltypes.B cell.down	celltypes	B cell	down	CC	GO:0140268	endoplasmic reticulum-plasma membrane contact site	5/1275	12/15236	0.416667	4.97908	4.16704	0.00195573	0.0464305	0.0401821	SACM1L/SARAF/C2CD2L/ESYT2/GRAMD1A	5
celltypes.B cell.down	celltypes	B cell	down	CC	GO:0005884	actin filament	18/1275	105/15236	0.171429	2.04854	3.25809	0.00261701	0.0599108	0.0518483	ACTG1/FLNA/ABI2/WIPF1/RAC2/DIAPH1/LUZP1/PDLIM2/KEAP1/MYO6/LIMA1/FYN/TPM2/FMN1/YES1/AIF1/ACTN1/ANXA1	18
celltypes.B cell.down	celltypes	B cell	down	CC	GO:0005938	cell cortex	40/1275	308/15236	0.12987	1.55192	2.95713	0.00353665	0.0755665	0.065397	MYL12B/EEF1A1/OSBPL8/SEPTIN6/WDR1/CAPZB/SPTAN1/SEPTIN9/SEPTIN1/PFN1/FLNA/MYADM/CLIP1/CLTB/EPB41/SEPTIN11/EXOC6B/DSTN/PDLIM2/RIC8B/FLNB/C2CD2L/RASAL3/GMFG/ADD3/SH3BP1/CAPN2/GIPC1/NDFIP1/GYPC/STK39/MYO6/MPP7/BIN2/STXBP1/IQGAP2/CLIP4/PXN/ACTN1/KIF21A	40
celltypes.B cell.down	celltypes	B cell	down	CC	GO:0005911	cell-cell junction	56/1275	470/15236	0.119149	1.42381	2.82035	0.0044571	0.0875991	0.0758104	ACTG1/WDR1/CYTH1/FLNA/ABI2/TMOD3/MYADM/ARHGEF6/RAP1B/NOTCH1/NCK1/PIK3R1/CASK/LUZP1/CCDC88C/RAP2B/SMAD7/PDLIM2/LIMS1/TBCD/ITGB1/MAGI3/ADD3/HEG1/SH3BP1/AHNAK/PRKCI/ZYX/SKAP1/PLCG1/EPHA4/PTPRJ/MPP7/S100A11/ITGA5/NECTIN3/ANK3/TIAM1/SYNM/TMEM204/FMN1/ITGA6/LAT/ITK/ZAP70/AQP3/LCP2/CD3E/JAML/PXN/THEMIS/PRKCH/ACTN1/DPP4/ANXA1/CD2	56
celltypes.B cell.down	celltypes	B cell	down	CC	GO:0030139	endocytic vesicle	41/1275	322/15236	0.127329	1.52156	2.85859	0.00450978	0.0875991	0.0758104	UBA52/HLA-C/VAMP2/HLA-F/B2M/ACTG1/RPS27A/HLA-E/HLA-A/AP2B1/CALR/RAC2/HSP90B1/CLTB/AP2A2/ATG14/HYOU1/VPS26B/RAPGEF6/VIM/ARRB2/FLNB/TRIM14/ZYX/MYO6/LPAR2/RAB43/ATP6V0E2/PTCH1/STXBP1/BTBD8/LDLRAP1/IL7R/ARRB1/LDLR/CD3G/CD3D/DPP4/CTSL/CD4/GNLY	41
celltypes.B cell.down	celltypes	B cell	down	CC	GO:0030118	clathrin coat	10/1275	48/15236	0.208333	2.48954	3.1235	0.00562363	0.0974256	0.0843145	AP2B1/SYNRG/SCLT1/NECAP2/CLTB/AP2A2/AP1M1/AP3M2/SYNJ1/BTBD8	10
celltypes.B cell.down	celltypes	B cell	down	CC	GO:0098685	Schaffer collateral - CA1 synapse	15/1275	88/15236	0.170455	2.0369	2.94794	0.00604207	0.100351	0.0868462	ACTG1/CAPZB/EEA1/SLC16A7/PTPRA/NOTCH1/CASK/ITGB1/PRKCI/GIPC1/PLCG1/EPHA4/PRKAR1B/FYN/APBA2	15
celltypes.B cell.down	celltypes	B cell	down	CC	GO:0032040	small-subunit processome	13/1275	72/15236	0.180556	2.1576	2.97534	0.00626216	0.100351	0.0868462	RPS16/RPS6/RPS13/RPS27/RPS12/RPS28/RPS27A/FBL/RPS3A/RPS4X/RPS24/RPS14/RPS15A	13
celltypes.B cell.down	celltypes	B cell	down	CC	GO:0098554	cytoplasmic side of endoplasmic reticulum membrane	6/1275	22/15236	0.272727	3.25904	3.20428	0.00786529	0.117248	0.101469	RPL27/RPS28/RPS29/HM13/RPS26/OTULINL	6
celltypes.B cell.down	celltypes	B cell	down	CC	GO:0005852	eukaryotic translation initiation factor 3 complex	5/1275	16/15236	0.3125	3.73431	3.30688	0.00813181	0.118466	0.102523	DDX3X/EIF3G/EIF3E/EIF3K/EIF3M	5
celltypes.B cell.down	celltypes	B cell	down	CC	GO:0099522	cytosolic region	8/1275	37/15236	0.216216	2.58374	2.91471	0.010147	0.144539	0.125087	ARL6IP5/CALM3/SENP7/CALM1/PPT1/STXBP1/PLCB1/GNAQ	8
celltypes.B cell.down	celltypes	B cell	down	CC	GO:0030132	clathrin coat of coated pit	5/1275	17/15236	0.294118	3.51465	3.13492	0.0107393	0.146466	0.126755	AP2B1/CLTB/AP2A2/SYNJ1/BTBD8	5
celltypes.B cell.down	celltypes	B cell	down	CC	GO:0034451	centriolar satellite	18/1275	123/15236	0.146341	1.74875	2.51961	0.0138098	0.170908	0.147908	RASSF7/PIBF1/ODF2L/TMEM63A/KEAP1/PIK3R5/CCDC66/TACC3/CYTH4/CHD3/GPR174/TBC1D31/NLRC3/FAM184A/AK5/FNIP2/PRKCQ/TRAT1	18
celltypes.B cell.down	celltypes	B cell	down	CC	GO:0036019	endolysosome	6/1275	25/15236	0.24	2.86795	2.82472	0.0150502	0.17553	0.151908	AP2B1/CTSB/AP2A2/SMPD1/LDLR/CTSL	6
celltypes.B cell.down	celltypes	B cell	down	CC	GO:0098636	protein complex involved in cell adhesion	10/1275	56/15236	0.178571	2.13389	2.56891	0.0166969	0.17553	0.151908	ITGA4/ITGB7/LGALS1/ITGB1/ITGAL/ITGB2/ITGA5/ITGA6/ITGA1/CD28	10
celltypes.B cell.down	celltypes	B cell	down	CC	GO:0010494	cytoplasmic stress granule	14/1275	90/15236	0.155556	1.85886	2.46952	0.0170728	0.17553	0.151908	EIF4A1/PRRC2C/MBNL1/DDX3X/CSDE1/DDX6/PABPC1/G3BP2/HIPK2/OGFOD1/HABP4/ZNFX1/ZFAND1/MOV10	14
celltypes.B cell.down	celltypes	B cell	down	CC	GO:0044295	axonal growth cone	6/1275	26/15236	0.230769	2.75765	2.71064	0.0182148	0.17553	0.151908	FLNA/TRPV2/EPHA4/PTCH1/TIAM1/KIF21A	6
celltypes.B cell.down	celltypes	B cell	down	CC	GO:0031105	septin complex	4/1275	13/15236	0.307692	3.67686	2.91787	0.0188948	0.17553	0.151908	SEPTIN6/SEPTIN9/SEPTIN1/SEPTIN11	4
celltypes.B cell.down	celltypes	B cell	down	CC	GO:1990907	beta-catenin-TCF complex	4/1275	13/15236	0.307692	3.67686	2.91787	0.0188948	0.17553	0.151908	TLE4/BCL9L/TCF7/LEF1	4
celltypes.B cell.down	celltypes	B cell	down	CC	GO:0005776	autophagosome	16/1275	111/15236	0.144144	1.72249	2.30869	0.0222284	0.200682	0.173675	CHMP3/ATG14/JMY/CHMP7/ATG13/NBR1/PIP4K2A/CLN3/ULK3/TECPR1/TRIM32/GRAMD1A/OPTN/MYO6/GABARAPL1/STING1	16
celltypes.B cell.down	celltypes	B cell	down	CC	GO:0032585	multivesicular body membrane	6/1275	28/15236	0.214286	2.56067	2.49789	0.0258458	0.217646	0.188356	SORL1/CHMP3/CHMP7/RAB27A/GIMAP5/NSG1	6
celltypes.B cell.down	celltypes	B cell	down	CC	GO:0030016	myofibril	26/1275	209/15236	0.124402	1.48658	2.14046	0.026795	0.217646	0.188356	MYL12B/ACTG1/CAPZB/FLNA/TMOD3/CALM3/CAB39/HABP4/CALM1/NBR1/BIN1/PDLIM2/PYROXD1/SYNE2/FLNB/TRIM32/AHNAK/SYNE1/FBXO32/BAG3/SVIL/ATP2B4/ANK3/SYNM/TPM2/ACTN1	26
celltypes.B cell.down	celltypes	B cell	down	CC	GO:0005765	lysosomal membrane	48/1275	433/15236	0.110855	1.32469	2.07136	0.0271205	0.217646	0.188356	UBA52/EEF1A1/VPS13A/HLA-F/B2M/LNPEP/SAR1A/ATP11B/TAB2/AP2B1/CHMP3/DNAJC5/AP2A2/RAP1B/PGAP6/AP1M1/TMEM106B/TMEM63A/CHMP7/HSPA8/SURF4/CTSA/CDIP1/PPT1/TRAF3IP3/CLN3/LITAF/NPC1/LRRC8A/TECPR1/CTSD/KCNK6/AHNAK/ABCA2/STOM/MYO6/PLEKHF1/ATP6V0E2/CYB561/PLAAT3/IFITM1/ARRB1/LDLR/GIMAP5/DPP4/FNIP2/GNAQ/NKG7	48
celltypes.B cell.down	celltypes	B cell	down	CC	GO:0031256	leading edge membrane	22/1275	171/15236	0.128655	1.5374	2.13565	0.0282717	0.223731	0.193622	EEF1A1/CD44/ABCA7/RPS3/DIAPH1/ARHGAP45/PLEKHA1/MACF1/SH3YL1/SYNE2/ITGB1/MYO6/PLCG1/PTPRJ/PDE9A/ITGA5/THEM4/TIAM1/AKAP5/SPATA13/AIF1/DPP4	22
celltypes.B cell.down	celltypes	B cell	down	CC	GO:0043209	myelin sheath	8/1275	45/15236	0.177778	2.12441	2.28274	0.0313934	0.23516	0.203513	MBP/CALM3/CALM1/ITGB1/PRKCI/SERINC5/MAL/TSPAN2	8
celltypes.B cell.down	celltypes	B cell	down	CC	GO:0005942	phosphatidylinositol 3-kinase complex	4/1275	15/15236	0.266667	3.18661	2.56044	0.0315503	0.23516	0.203513	PIK3CD/ATG14/PIK3R1/PIK3R5	4
celltypes.B cell.down	celltypes	B cell	down	CC	GO:0017053	transcription repressor complex	11/1275	71/15236	0.15493	1.85138	2.17294	0.0330791	0.243721	0.210922	REST/N4BP2L2/RBPJ/MIER1/BIN1/SKI/H1-0/MYC/CTBP2/CORO2A/GFI1	11
celltypes.B cell.down	celltypes	B cell	down	CC	GO:0031904	endosome lumen	6/1275	30/15236	0.2	2.38996	2.30289	0.0353453	0.246815	0.2136	B2M/LNPEP/CTSB/CTSD/CTSL/PRF1	6
celltypes.B cell.down	celltypes	B cell	down	CC	GO:0032994	protein-lipid complex	6/1275	30/15236	0.2	2.38996	2.30289	0.0353453	0.246815	0.2136	HDLBP/PCYOX1/BIN1/APOL1/LDLR/APOBR	6
celltypes.B cell.down	celltypes	B cell	down	MF	GO:0003735	structural constituent of ribosome	58/1278	154/14933	0.376623	4.40072	12.9774	1.46896e-23	1.5806e-20	1.49679e-20	RPL17/RPS10/RPL12/RPS16/RPL19/RPL26/UBA52/RPS18/RPL23A/RPS6/RPL11/RPS13/RPL10A/RPL37/RPS27/RPL29/RPS15/RPL13A/RPS21/RPL9/RPL36A/RPS12/RPS2/RPL27/RPL10/RPL22/RPL4/RPL7/RPS28/RPS27A/RPL32/RPL13/RPL3/RPL27A/RPL36/MRPL41/RPL21/RPL31/RPS29/RPL24/RPL34/RPL14/MRPS5/RPL36AL/RPL38/RPS25/RPS3A/RPS4X/RPL30/RPS24/RPS14/RPL35A/RPS15A/RPS3/RPS26/DAP3/MRPS33/MRPS6	58
celltypes.B cell.down	celltypes	B cell	down	MF	GO:0032813	tumor necrosis factor receptor superfamily binding	16/1278	47/14933	0.340426	3.97776	6.25501	8.81571e-07	0.000347034	0.000328633	CASP8AP2/FADD/RIPK1/LTB/CFLAR/TRADD/CASP8/TNFSF10/LTA/TRAF1/TNFSF8/TNFSF13B/BEX3/TNFSF14/CD40LG/FASLG	16
celltypes.B cell.down	celltypes	B cell	down	MF	GO:0035591	signaling adaptor activity	25/1278	125/14933	0.2	2.33693	4.59193	4.88586e-05	0.00941325	0.00891413	DDX3X/NCK2/G3BP2/STAT3/ABI2/NLRP1/FADD/RIPK1/NCK1/PIK3R1/BIN1/CDC42SE2/TRADD/RGS14/PAG1/MPP7/TRAF1/LAT/LDLRAP1/DOK2/CD3E/CD3G/STING1/TRAT1/SLA2	25
celltypes.B cell.down	celltypes	B cell	down	MF	GO:0045296	cadherin binding	49/1278	323/14933	0.151703	1.7726	4.29445	5.69998e-05	0.00941325	0.00891413	EEF1G/RPL23A/RPL29/DDX3X/FXYD5/DDX6/CD46/RPS2/SLK/CAPZB/SPTAN1/RPL24/RPL34/RPL14/RARS1/SEPTIN9/EIF3E/PFN1/FLNA/EIF2A/RPS26/ZC3HAV1/TES/HDLBP/LDHA/TMOD3/NCK1/HSPA8/BZW2/MACF1/HSPA5/STK38/FLNB/ITGB1/ESYT2/DNAJB1/EFHD2/AHNAK/GIPC1/DOCK9/PTPRJ/BAG3/MPP7/S100A11/LIMA1/CDK5R1/ANK3/ITGA6/ANXA1	49
celltypes.B cell.down	celltypes	B cell	down	MF	GO:0019902	phosphatase binding	32/1278	181/14933	0.176796	2.0658	4.41333	6.12386e-05	0.00941325	0.00891413	JAK1/WNK1/TERF2IP/SOD1/STAT3/SMAD2/CDKN1B/CNST/HSP90B1/KIF3A/PIK3R1/MVP/CRY1/SFI1/SH3YL1/JAK3/NFATC2/KCNQ1/LGALS3/PVRIG/NHERF1/SKAP1/RCAN3/IKBKE/CTSC/ATP2B4/LCK/AKAP5/ITGA1/PXN/FCRL6/SYTL2	32
celltypes.B cell.down	celltypes	B cell	down	MF	GO:0019843	rRNA binding	14/1278	62/14933	0.225806	2.63847	3.95497	0.000613136	0.0745279	0.0705763	RPL12/RPS18/RPL23A/RPL11/RPS13/NPM1/RPL37/RPL9/GTF3A/RPS4X/RPS3/SBDS/MTERF4/MRPS6	14
celltypes.B cell.down	celltypes	B cell	down	MF	GO:0019207	kinase regulator activity	39/1278	269/14933	0.144981	1.69406	3.51419	0.000779454	0.0745279	0.0705763	STK4/EEF1A1/NPM1/DDX3X/WNK1/PIM1/TGFB1/CDKN1B/RAC2/DNAJC3/CALM3/CAB39/CCNG1/AGAP2/ATG14/NCK1/PIK3R1/CALM1/ATG13/PTPRC/PKIA/PIK3R5/HSPA5/GMFG/CAMK2N1/TRIB2/CCND3/PARP8/CCND2/CDKN2C/IL6ST/PIK3IP1/ACVR2B/PRKAR1B/CDK5R1/RGCC/PRKCH/CCL5/CD40LG	39
celltypes.B cell.down	celltypes	B cell	down	MF	GO:0034596	phosphatidylinositol phosphate 4-phosphatase activity	5/1278	10/14933	0.5	5.84233	4.68603	0.000795897	0.0745279	0.0705763	SACM1L/SYNJ2/SYNJ1/INPP4A/INPP4B	5
celltypes.B cell.down	celltypes	B cell	down	MF	GO:0015026	coreceptor activity	13/1278	58/14933	0.224138	2.61898	3.77924	0.0010225	0.0846315	0.0801441	IL2RG/ITGA4/ITGB1/IL6ST/CD8B/CCR5/TMIGD2/GPR15/CD28/CD4/CD8A/TGFBR3/IL2RB	13
celltypes.B cell.down	celltypes	B cell	down	MF	GO:0051087	protein-folding chaperone binding	22/1278	128/14933	0.171875	2.0083	3.50485	0.00120782	0.0928299	0.0879078	SOD1/RPS3/CALR/CDKN1B/DNAJC3/BIRC2/HSPA8/TBCC/CDC37L1/BIN1/SDF2L1/HSPA5/TBCD/ATP1A1/DNAJB1/GRPEL2/SGTB/BAG3/ERN1/CTSC/SPN/FNIP2	22
celltypes.B cell.down	celltypes	B cell	down	MF	GO:0042608	T cell receptor binding	5/1278	11/14933	0.454545	5.31121	4.37583	0.00135659	0.0973129	0.0921531	HLA-E/HLA-A/LCK/CD3E/CD3G	5
celltypes.B cell.down	celltypes	B cell	down	MF	GO:0140328	floppase activity	6/1278	16/14933	0.375	4.38175	4.14037	0.00146657	0.0986266	0.0933971	ATP11B/ABCA7/ABCB1/ABCA2/ATP8B2/ATP10A	6
celltypes.B cell.down	celltypes	B cell	down	MF	GO:0030695	GTPase regulator activity	58/1278	460/14933	0.126087	1.47328	3.15428	0.00177215	0.111386	0.10548	EEF1B2/TBC1D10C/CYTH1/GPSM3/SMAP1/ARL2BP/ARHGEF18/RAP1A/ARHGAP15/DENND4C/ARHGEF6/ARAP2/ARHGAP30/TBC1D15/CDC42SE1/ARHGEF1/ARHGAP45/AGAP2/CCDC88C/RABGAP1L/ARFGEF1/RHOF/RGS14/RAPGEF6/RASA2/STXBP5/TBCD/RIC8B/ARHGAP26/RASAL3/DEF6/AGAP3/CYTH4/NET1/FGD3/SH3BP1/AGFG2/ARHGEF3/RASA3/DOCK10/RALGDS/DENND2D/DOCK9/TBC1D2B/PLCG1/ARHGAP21/IQGAP2/RASGRP1/TIAM1/RCBTB2/NUCB2/RGS10/TBC1D4/PLCB1/ARRB1/RASGRF2/SPATA13…	58
celltypes.B cell.down	celltypes	B cell	down	MF	GO:0140375	immune receptor activity	21/1278	127/14933	0.165354	1.93211	3.22722	0.00252102	0.142769	0.135199	CD44/IL2RG/IL11RA/IL17RA/IL27RA/IL6ST/FCER1G/IL6R/IL7R/KLRK1/CCR5/KLRC2/CXCR3/KLRD1/KLRF1/IL18R1/CD4/CX3CR1/CCR4/IL2RB/FCGR3A	21
celltypes.B cell.down	celltypes	B cell	down	MF	GO:0140678	molecular function inhibitor activity	54/1278	431/14933	0.12529	1.46397	2.99016	0.0028705	0.154433	0.146244	RPL11/TXNIP/NPM1/RPL37/RPS15/XIST/URI1/SORL1/CDKN1B/DNAJC3/HSP90B1/CHMP3/PPP1R2/CDC42SE1/NOTCH1/NCK1/GBP2/CALM1/SERPINB6/BIN1/SMAD7/KEAP1/PTPRC/PKIA/HSPA5/ANKRD36C/MCUB/SKI/GBP5/CABIN1/STYX/GMFG/CAMK2N1/TRIB2/LGALS3/DNAJB1/SPOCK2/STOM/LYAR/CDKN2C/PHACTR2/IQGAP2/TIMP1/PRKAR1B/ATP2B4/ARRB1/BEX3/LEF1/PRKCH/CCL5/FNIP2/ANXA1/ID2/CST7	54
celltypes.B cell.down	celltypes	B cell	down	MF	GO:0031625	ubiquitin protein ligase binding	39/1278	290/14933	0.134483	1.57139	3.00602	0.00314358	0.161071	0.15253	UBA52/RPL11/TXNIP/JAK1/FBXW7/ACTG1/RPS27A/USP25/PA2G4/HM13/ABI2/SMAD2/CALR/ABCB1/CDKN1B/RIPK1/HSPA8/CASP8/SMAD7/PDLIM2/PRKACB/PTPN22/HSPA5/SKI/RFFL/ARRB2/NAE1/TRIB2/XBP1/APBB1/GABARAPL1/IKBKE/TRAF1/ARRB1/UBASH3B/FHIT/STING1/PYHIN1/PRR5L	39
celltypes.B cell.down	celltypes	B cell	down	MF	GO:0008234	cysteine-type peptidase activity	23/1278	150/14933	0.153333	1.79165	2.98109	0.00433885	0.202983	0.19222	HINT1/USP47/USP25/USP36/USP3/PGPEP1/CTSB/SENP7/CFLAR/PIGK/CYLD/CASP8/CASP6/USP20/CTSF/CTSD/CAPN2/BLMH/TNFAIP3/CTSC/OTUD7B/CTSL/CTSW	23
celltypes.B cell.down	celltypes	B cell	down	MF	GO:0045125	bioactive lipid receptor activity	5/1278	14/14933	0.357143	4.17309	3.63376	0.00472919	0.206085	0.195157	S1PR4/GPR174/LPAR2/LPAR6/S1PR5	5
celltypes.B cell.down	celltypes	B cell	down	MF	GO:0001784	phosphotyrosine residue binding	10/1278	46/14933	0.217391	2.54014	3.20048	0.00478821	0.206085	0.195157	NCK2/PFN1/SAMSN1/SLA/PIK3R1/GRAP2/LCK/LDLRAP1/YES1/ZAP70	10
celltypes.B cell.down	celltypes	B cell	down	MF	GO:0001965	G-protein alpha-subunit binding	7/1278	26/14933	0.269231	3.14587	3.35022	0.00509605	0.207059	0.19608	CCDC88C/RGS14/RIC8B/IGF1R/NUCB2/RGS10/F2R	7
celltypes.B cell.down	celltypes	B cell	down	MF	GO:0001727	lipid kinase activity	9/1278	40/14933	0.225	2.62905	3.15611	0.00575566	0.213555	0.202232	PIK3CD/PIK3R1/ATM/DGKE/PIP4K2A/DGKA/CERK/DGKH/DGKZ	9
celltypes.B cell.down	celltypes	B cell	down	MF	GO:0003712	transcription coregulator activity	56/1278	467/14933	0.119914	1.40116	2.69451	0.00615572	0.220785	0.209079	NUCKS1/NPM1/HMGA1/TLE5/CASP8AP2/SUB1/NACA/IRF2BP2/PSIP1/PA2G4/SUPT20H/N4BP2L2/JADE1/XPC/NCOA1/KAT6A/ARL2BP/ARID5A/URI1/PBXIP1/MIER1/RRP1B/HIPK2/BIRC2/PHF10/CNOT2/ZMYND11/PHF2/SETD3/MRTFA/KDM3A/KDM7A/NOTCH1/JMY/LPIN2/MED15/SMAD7/TLE4/MAML2/SSBP3/TOB1/TRIM32/TRIM14/DNAJB1/APBB1/SFMBT2/CITED2/DNMT3A/PRMT2/BMAL1/BCL9L/HSBP1L1/CTBP2/ARRB1/TRERF1/ID2	56
celltypes.B cell.down	celltypes	B cell	down	MF	GO:0048306	calcium-dependent protein binding	12/1278	64/14933	0.1875	2.19087	2.92074	0.00740491	0.234375	0.221948	DDX5/VAMP2/CALM3/CALM1/CLN3/S100A6/PLSCR3/S100A4/S100A10/S100A11/S100B/ANXA1	12
celltypes.B cell.down	celltypes	B cell	down	MF	GO:0003779	actin binding	50/1278	412/14933	0.121359	1.41804	2.63238	0.00743243	0.234375	0.221948	ARPC2/TMSB10/FXYD5/LIMD2/WDR1/CAPZB/SPTAN1/P4HB/UTRN/PFN1/FLNA/WIPF1/TMOD3/SETD3/DIAPH1/MRTFA/JMY/LUZP1/TMSB4X/EPB41/BIN1/ABLIM1/GBP1/DSTN/MACF1/PDLIM2/LIMS1/SYNE2/FLNB/GMFG/ITGB1/EVL/ADD3/SYNE1/GIPC1/MYO1F/S100A4/MYO6/SNTB1/PHACTR2/IQGAP2/LIMA1/SVIL/CDK5R1/CORO2A/TPM2/FMN1/AIF1/CCR5/ACTN1	50
celltypes.B cell.down	celltypes	B cell	down	MF	GO:0019955	cytokine binding	19/1278	122/14933	0.155738	1.81974	2.78127	0.00762373	0.234375	0.221948	IL2RG/TMC8/ITGA4/GBP1/ITGB1/IL11RA/LTBP3/IL6ST/IL6R/CCR5/TNFRSF1A/CXCR3/NOG/IL18R1/CD4/CX3CR1/TGFBR3/CCR4/IL2RB	19
celltypes.B cell.down	celltypes	B cell	down	MF	GO:0004629	phospholipase C activity	7/1278	28/14933	0.25	2.92117	3.11284	0.0078914	0.235865	0.223359	SMPD1/PLCD1/PLCG1/PLCB1/PLCL1/CCR5/CCL5	7
celltypes.B cell.up	celltypes	B cell	up	BP	GO:0042113	B cell activation	71/1250	255/14457	0.278431	3.22023	11.0045	1.55586e-19	8.04222e-16	7.0292e-16	TNFRSF13B/CD180/BANK1/PAX5/FCGR2B/BTK/BLNK/FCRL1/CD79A/MS4A1/MEF2C/CD19/CD79B/POU2AF1/CD22/IRF8/HHEX/TNFRSF13C/GAPT/HDAC9/CD40/SYK/CXCR5/CD74/LYN/SWAP70/PLCG2/LYL1/TPD52/CCR6/LAT2/PAWR/FCRL3/SKAP2/NOTCH2/CDKN1A/BCL2/CR2/PRKCB/BCL3/TCF3/ZFP36L1/VAV3/INPP5D/SYVN1/PELI1/AKIRIN2/PRKCD/CR1/SLC15A4/TFRC/STAT6/CD81/DCLRE1C/PTPN6/LAPTM5/HDAC5/CD38/IKZF3/IRS2/BCL6/FNIP1/ADAM17/BST2/TP53BP1/TCIRG1/LIG4/GPR…	71
celltypes.B cell.up	celltypes	B cell	up	BP	GO:0050853	B cell receptor signaling pathway	30/1250	61/14457	0.491803	5.688	11.2878	1.52619e-16	3.94443e-13	3.44758e-13	BANK1/FCGR2B/BTK/BLNK/CD79A/CD72/MS4A1/MEF2C/CD19/CD79B/CD22/SYK/BLK/LYN/STAP1/PLCG2/LAT2/FCRL3/BCL2/PRKCB/VAV3/RFTN1/GRB2/CD81/PTPN6/CD38/FOXP1/FCMR/NFKBIA/GPS2	30
celltypes.B cell.up	celltypes	B cell	up	BP	GO:0002495	antigen processing and presentation of peptide antigen via MHC class II	20/1250	31/14457	0.645161	7.46168	11.0798	1.58403e-14	1.63757e-11	1.43129e-11	MARCHF1/HLA-DQA1/FCGR2B/HLA-DQB1/HLA-DRB5/HLA-DRA/HLA-DRB1/HLA-DOB/HLA-DMA/HLA-DMB/HLA-DPA1/CD74/IFI30/HLA-DPB1/HLA-DOA/UNC93B1/CTSS/MARCHF8/PIKFYVE/LGMN	20
celltypes.B cell.up	celltypes	B cell	up	BP	GO:0002250	adaptive immune response	85/1250	415/14457	0.204819	2.36886	8.70452	2.85201e-14	2.106e-11	1.84072e-11	IGLL5/TNFRSF13B/MPEG1/HLA-DQA1/FCGR2B/BTK/HLA-DQB1/CD79A/MEF2C/JCHAIN/CD19/CD79B/HLA-DRB5/HLA-DRA/HLA-DRB1/TNFRSF13C/HLA-DOB/CD40/HLA-DMA/HLA-DMB/HLA-DPA1/SYK/CD74/LYN/SWAP70/CTSH/LILRB1/HLA-DPB1/HLA-DOA/IRF4/BTLA/CCR6/UNC93B1/LAT2/STX7/CR2/TFEB/PRKCB/IL4R/ALCAM/BCL3/BACH2/CTSS/CD55/INPP5D/SIPA1/NFKB2/RELB/AKIRIN2/DUSP22/TREX1/PRKCD/RFTN1/CR1/SLC15A4/TFRC/RIPK2/LY9/STAT6/MARCHF8/CD81/SOCS5/RIPK3/…	85
celltypes.B cell.up	celltypes	B cell	up	BP	GO:0042100	B cell proliferation	31/1250	83/14457	0.373494	4.31968	9.3309	5.49616e-13	2.84097e-10	2.48311e-10	TNFRSF13B/CD180/FCGR2B/BTK/CD79A/MS4A1/MEF2C/CD19/CD22/TNFRSF13C/GAPT/CD40/CD74/LYN/PAWR/FCRL3/CDKN1A/BCL2/CR2/TCF3/VAV3/INPP5D/PELI1/PRKCD/TFRC/CD81/CD38/IKZF3/IRS2/BCL6/GPR183	31
celltypes.B cell.up	celltypes	B cell	up	BP	GO:0051249	regulation of lymphocyte activation	85/1250	465/14457	0.182796	2.11414	7.51284	1.8587e-11	6.86257e-09	5.99814e-09	TNFRSF13B/CD24/BANK1/HLA-DQA1/FCGR2B/BTK/HLA-DQB1/MEF2C/CD19/HLA-DRB5/CD22/HLA-DRA/HLA-DRB1/CD83/TNFRSF13C/HLA-DOB/CD40/HLA-DMA/HLA-DMB/HLA-DPA1/SYK/CD74/LYN/LILRB1/HLA-DPB1/HLA-DOA/IRF4/LGALS9/DTX1/PAWR/FCRL3/CDKN1A/MAP3K8/BCL2/SMARCB1/IL2RA/IL4R/PPP3CA/TCF3/CD55/ZFP36L1/BTN2A2/VAV3/INPP5D/PELI1/AKIRIN2/RNF41/DUSP22/TREX1/CR1/SLC15A4/TFRC/RIPK2/STAT6/CGAS/CD81/SOX4/SOCS5/RIPK3/IRF1/PTPN6/LAPTM5/…	85
celltypes.B cell.up	celltypes	B cell	up	BP	GO:1903131	mononuclear cell differentiation	86/1250	481/14457	0.178794	2.06786	7.32779	4.67399e-11	1.50999e-08	1.31979e-08	PAX5/FCGR2B/BTK/BLNK/CD79A/MS4A1/CD19/CD79B/POU2AF1/IRF8/HLA-DRA/HLA-DRB1/CD83/HHEX/HDAC9/SYK/CD74/LYN/PLCG2/LILRB1/LYL1/TRIB1/HLA-DOA/IRF4/LGALS9/DTX1/TPD52/CCR6/FCRL3/NOTCH2/BCL2/CR2/SMARCB1/IL2RA/IL4R/BCL3/TCF3/ZFP36L1/BTN2A2/RB1/INPP5D/FOS/RELB/SYVN1/RNF41/CR1/RIPK2/LY9/STAT6/UCP2/NFATC1/TBK1/PARP1/SOX4/SOCS5/RIPK3/IRF1/DCLRE1C/PTPN6/HDAC5/ARID1B/IFI16/SLAMF1/IKZF3/BCL6/FNIP1/ADAM17/IRF7/TCIR…	86
celltypes.B cell.up	celltypes	B cell	up	BP	GO:0002399	MHC class II protein complex assembly	11/1250	13/14457	0.846154	9.78628	9.75012	1.2842e-10	3.01728e-08	2.63721e-08	HLA-DQA1/HLA-DQB1/HLA-DRB5/HLA-DRA/HLA-DRB1/HLA-DOB/HLA-DMA/HLA-DMB/HLA-DPA1/HLA-DPB1/HLA-DOA	11
celltypes.B cell.up	celltypes	B cell	up	BP	GO:0002503	peptide antigen assembly with MHC class II protein complex	11/1250	13/14457	0.846154	9.78628	9.75012	1.2842e-10	3.01728e-08	2.63721e-08	HLA-DQA1/HLA-DQB1/HLA-DRB5/HLA-DRA/HLA-DRB1/HLA-DOB/HLA-DMA/HLA-DMB/HLA-DPA1/HLA-DPB1/HLA-DOA	11
celltypes.B cell.up	celltypes	B cell	up	BP	GO:0070661	leukocyte proliferation	61/1250	299/14457	0.204013	2.35954	7.30807	1.60715e-10	3.61189e-08	3.15693e-08	TNFRSF13B/CD24/CD180/FCGR2B/BTK/CD79A/MS4A1/MEF2C/CD19/CD22/HLA-DRB1/HHEX/TNFRSF13C/GAPT/CD40/HLA-DMB/HLA-DPA1/SYK/CD74/LYN/LILRB1/HLA-DPB1/LGALS9/PAWR/FCRL3/CDKN1A/BCL2/CR2/IL2RA/ST6GAL1/GSTP1/PPP3CA/TCF3/CD55/BTN2A2/VAV3/INPP5D/PELI1/PRKCD/CR1/TFRC/RIPK2/STAT6/TBK1/CD81/RIPK3/IRF1/PTPN6/CD38/IMPDH2/SLAMF1/IKZF3/IRS2/BCL6/BST2/TCIRG1/PRKAR1A/GPR183/HMGB1/ALKBH5/TMEM131L	61
celltypes.B cell.up	celltypes	B cell	up	BP	GO:0002221	pattern recognition receptor signaling pathway	53/1250	252/14457	0.210317	2.43245	7.05725	8.25251e-10	1.5799e-07	1.38089e-07	TLR10/BTK/SCIMP/SYK/TLR6/LYN/PLCG2/IRF4/PRKCE/TASL/AIM2/UNC93B1/PIK3AP1/FCRL3/CTSS/OAS1/LACC1/BIRC3/IRAK2/PELI1/TREX1/RFTN1/IFIH1/SLC15A4/NAGK/RIPK2/WASHC4/GRAMD4/TIFA/CGAS/LYPLAL1/TBK1/PARP1/IRF1/SQSTM1/APPL1/IFI16/IRAK1/SEC14L1/TRAF3/BCL10/WDFY1/IRF7/TNIP1/MFHAS1/CYBA/HMGB1/DDX41/RIOK3/BANF1/NFKBIA/GPS2/PHB2	53
celltypes.B cell.up	celltypes	B cell	up	BP	GO:0070663	regulation of leukocyte proliferation	50/1250	234/14457	0.213675	2.47128	6.98048	1.40699e-09	2.59741e-07	2.27023e-07	TNFRSF13B/CD24/FCGR2B/BTK/MEF2C/CD22/HLA-DRB1/HHEX/TNFRSF13C/CD40/HLA-DMB/HLA-DPA1/SYK/CD74/LYN/LILRB1/HLA-DPB1/LGALS9/PAWR/FCRL3/CDKN1A/BCL2/IL2RA/ST6GAL1/GSTP1/PPP3CA/TCF3/CD55/BTN2A2/VAV3/INPP5D/PELI1/CR1/TFRC/RIPK2/STAT6/CD81/RIPK3/IRF1/PTPN6/CD38/SLAMF1/IKZF3/IRS2/BCL6/BST2/PRKAR1A/GPR183/HMGB1/TMEM131L	50
celltypes.B cell.up	celltypes	B cell	up	BP	GO:0045088	regulation of innate immune response	74/1250	429/14457	0.172494	1.995	6.43621	5.5695e-09	8.99649e-07	7.86326e-07	TLR10/FCGR2B/BTK/SCIMP/SYK/TLR6/LYN/DTX4/PLCG2/NCF1/LILRB1/IRF4/LGALS9/PRKCE/TASL/AIM2/UNC93B1/CALHM6/PIK3AP1/FCRL3/CTSS/OAS1/LACC1/BIRC3/PARP14/IRAK2/GRN/INPP5D/PELI1/AKIRIN2/TREX1/RFTN1/IFIH1/CR1/SLC15A4/NAGK/GRB2/RIPK2/WASHC4/GRAMD4/TIFA/CGAS/STAT2/LYPLAL1/TBK1/PARP1/IRF1/SQSTM1/PTPN6/PTPN1/APPL1/YWHAZ/IFI16/IRAK1/SEC14L1/TRAF3/BCL10/WDFY1/NR1H2/IRF7/TNIP1/MFHAS1/CYBA/HMGB1/DDX41/RIOK3/DDX39A/…	74
celltypes.B cell.up	celltypes	B cell	up	BP	GO:0002683	negative regulation of immune system process	77/1250	471/14457	0.163482	1.89077	6.04651	3.03712e-08	4.13128e-06	3.61089e-06	TNFRSF13B/BANK1/FCGR2B/BTK/CD72/CD22/HLA-DRB1/HLA-DOB/SYK/CD74/TLR6/LYN/STAP1/DTX4/LILRB1/CD200/TRIB1/HLA-DOA/IRF4/LGALS9/DTX1/CNR2/ACP5/PAWR/FCRL3/CR2/EZR/IL2RA/IL4R/RHBDF2/OAS1/PARP14/GRN/CD55/BTN2A2/INPP5D/PELI1/DUSP22/TREX1/CR1/GRB2/STAT6/GRAMD4/CGAS/STAT2/LYPLAL1/PARP1/SOCS5/IRF1/SQSTM1/PTPN6/LAPTM5/APPL1/ADORA2A/LRCH1/YWHAZ/IFI16/SEC14L1/FAM76B/SLAMF1/TSC22D3/NR1H2/BCL6/BST2/GPX1/TOB2/PRKAR…	77
celltypes.B cell.up	celltypes	B cell	up	BP	GO:0032479	regulation of type I interferon production	30/1250	121/14457	0.247934	2.8675	6.34625	8.95332e-08	1.07627e-05	9.40701e-06	IRF8/SYK/DTX4/IRF5/PLCG2/LILRB1/REL/OAS1/RELB/TREX1/IFIH1/TRIM38/RIPK2/CGAS/TBK1/KPNA2/IRF1/TANK/IRAK1/TRAF3/IRF7/XAF1/CUL3/RIOK3/BANF1/OTUD5/RBX1/MORC3/DHX9/QKI	30
celltypes.B cell.up	celltypes	B cell	up	BP	GO:0032606	type I interferon production	30/1250	121/14457	0.247934	2.8675	6.34625	8.95332e-08	1.07627e-05	9.40701e-06	IRF8/SYK/DTX4/IRF5/PLCG2/LILRB1/REL/OAS1/RELB/TREX1/IFIH1/TRIM38/RIPK2/CGAS/TBK1/KPNA2/IRF1/TANK/IRAK1/TRAF3/IRF7/XAF1/CUL3/RIOK3/BANF1/OTUD5/RBX1/MORC3/DHX9/QKI	30
celltypes.B cell.up	celltypes	B cell	up	BP	GO:1903039	positive regulation of leukocyte cell-cell adhesion	49/1250	257/14457	0.190661	2.20511	5.99691	9.72585e-08	1.14257e-05	9.98645e-06	CD24/HLA-DQA1/HLA-DQB1/HLA-DRB5/HLA-DRA/ALOX5/HLA-DRB1/CD83/TNFRSF13C/HLA-DOB/HLA-DMA/HLA-DMB/HLA-DPA1/SYK/CD74/LYN/LILRB1/HLA-DPB1/HLA-DOA/LGALS9/MAP3K8/SMARCB1/IL2RA/IL4R/PPP3CA/CD55/BTN2A2/CR1/TFRC/RIPK2/GCNT1/CD81/SOX4/SOCS5/PTPN6/CHST2/ARID1B/IRAK1/BCL10/SLAMF1/BCL6/BRD4/HMGB1/BRD2/SMARCD2/SMARCE1/RHOA/CD47/CCR7	49
celltypes.B cell.up	celltypes	B cell	up	BP	GO:2000106	regulation of leukocyte apoptotic process	23/1250	81/14457	0.283951	3.28406	6.34173	2.05314e-07	2.25802e-05	1.97359e-05	BTK/MEF2C/CD74/LYN/LILRB1/LGALS9/HSH2D/BCL2/BCL3/ST6GAL1/HIF1A/BCL2L11/RIPK3/BCL10/TSC22D3/IRS2/BCL6/FNIP1/ADAM17/IRF7/FOXP1/PRKD2/CCR7	23
celltypes.B cell.up	celltypes	B cell	up	BP	GO:0007159	leukocyte cell-cell adhesion	63/1250	376/14457	0.167553	1.93785	5.66877	2.27666e-07	2.45167e-05	2.14285e-05	CD24/HLA-DQA1/HLA-DQB1/HLA-DRB5/HLA-DRA/ALOX5/HLA-DRB1/CD83/TNFRSF13C/HLA-DOB/HLA-DMA/HLA-DMB/HLA-DPA1/SYK/CD74/LYN/LILRB1/HLA-DPB1/HLA-DOA/LGALS9/DTX1/PAWR/MAP3K8/EZR/NT5E/SMARCB1/IL2RA/IL4R/ZDHHC21/PPP3CA/CD55/BTN2A2/PELI1/DUSP22/CR1/TFRC/RIPK2/GCNT1/CD81/SOX4/SOCS5/IRF1/PTPN6/LAPTM5/PECAM1/CHST2/ADORA2A/ARID1B/IRAK1/BCL10/SLAMF1/BCL6/TNIP1/PRKAR1A/BRD4/HMGB1/BRD2/SMARCD2/SMARCE1/RHOA/TMEM131L/…	63
celltypes.B cell.up	celltypes	B cell	up	BP	GO:0050870	positive regulation of T cell activation	45/1250	236/14457	0.190678	2.20531	5.74335	3.21445e-07	3.3231e-05	2.90451e-05	CD24/HLA-DQA1/HLA-DQB1/HLA-DRB5/HLA-DRA/HLA-DRB1/CD83/TNFRSF13C/HLA-DOB/HLA-DMA/HLA-DMB/HLA-DPA1/SYK/CD74/LYN/LILRB1/HLA-DPB1/HLA-DOA/LGALS9/MAP3K8/SMARCB1/IL2RA/IL4R/PPP3CA/CD55/BTN2A2/CR1/TFRC/RIPK2/CD81/SOX4/SOCS5/PTPN6/ARID1B/BCL10/SLAMF1/BCL6/BRD4/HMGB1/BRD2/SMARCD2/SMARCE1/RHOA/CD47/CCR7	45
celltypes.B cell.up	celltypes	B cell	up	BP	GO:0016064	immunoglobulin mediated immune response	28/1250	115/14457	0.243478	2.81597	6.01493	3.58116e-07	3.62961e-05	3.17241e-05	IGLL5/FCGR2B/BTK/CD19/CD40/CD74/SWAP70/CCR6/CR2/IL4R/BCL3/CD55/INPP5D/TREX1/PRKCD/CR1/SLC15A4/TFRC/STAT6/CD81/PTPN6/BCL10/BCL6/IRF7/TP53BP1/TCIRG1/LIG4/FCMR	28
celltypes.B cell.up	celltypes	B cell	up	BP	GO:0002366	leukocyte activation involved in immune response	50/1250	276/14457	0.181159	2.09522	5.65169	3.74046e-07	3.71816e-05	3.24981e-05	CD180/FCGR2B/BTK/CD19/POU2AF1/IRF8/HLA-DRA/HLA-DRB1/GAPT/CD40/HLA-DMB/SYK/CD74/LYN/SWAP70/PLCG2/LILRB1/IRF4/LGALS9/GAB2/PRKCE/CCR6/LAT2/NOTCH2/IL4R/BCL3/GRN/RELB/TREX1/SNAP23/CR1/SLC15A4/TFRC/RIPK2/LY9/STAT6/TBK1/CD81/SOCS5/PTPN6/EIF2AK4/SLAMF1/BCL6/TP53BP1/BRD4/LIG4/FOXP1/GPR183/HMGB1/BRD2	50
celltypes.B cell.up	celltypes	B cell	up	BP	GO:0016032	viral process	63/1250	384/14457	0.164062	1.89748	5.48371	4.88778e-07	4.46914e-05	3.90619e-05	HLA-DRB1/CD74/LGALS9/USP6NL/PEG10/CXCR4/SMC6/BCL2/CR2/SMARCB1/APOBEC3F/ST6GAL1/OAS1/TPCN1/CD55/UVRAG/ISG20/MGAT5/APOBEC3C/VPS37B/IFIH1/CR1/TRIM38/BICD1/LAMTOR5/TFRC/USF1/OAZ2/SP100/CD81/KPNA2/ATG16L2/PARD6A/EIF2AK4/PIKFYVE/EPS15/IFI16/APOBEC3D/OAZ1/SLAMF1/BST2/IRF7/TNIP1/HSP90AB1/ST3GAL2/BRD4/LIG4/ZBED1/HMGB1/USF2/CSNK2B/BANF1/SP1/JUN/PRMT1/CHMP4B/RAD23A/SMC5/DDB1/DHX9/EIF3L/RAN/DEK	63
celltypes.B cell.up	celltypes	B cell	up	BP	GO:0002833	positive regulation of response to biotic stimulus	62/1250	376/14457	0.164894	1.90709	5.48285	5.03543e-07	4.48761e-05	3.92234e-05	CD180/TLR10/LY86/BTK/SCIMP/HLA-DRB1/SYK/TLR6/LYN/PLCG2/IRF4/PRKCE/TASL/AIM2/UNC93B1/PIK3AP1/FCRL3/EMILIN2/CTSS/OAS1/LACC1/BIRC3/IRAK2/GRN/PELI1/AKIRIN2/TREX1/RFTN1/IFIH1/SLC15A4/NAGK/RIPK2/WASHC4/GRAMD4/TIFA/CGAS/LYPLAL1/TBK1/PARP1/IRF1/SQSTM1/APPL1/IFI16/IRAK1/SEC14L1/TRAF3/BCL10/WDFY1/IRF7/TNIP1/MFHAS1/CYBA/HMGB1/DDX41/RIOK3/BANF1/NFKBIA/GPS2/PHB2/DHX9/SFPQ/XRCC6	62
celltypes.B cell.up	celltypes	B cell	up	BP	GO:0002237	response to molecule of bacterial origin	52/1250	296/14457	0.175676	2.03179	5.51784	5.91067e-07	5.09205e-05	4.45063e-05	CD24/CD180/TLR10/LY86/FCGR2B/BTK/SCIMP/MEF2C/IRF8/CD40/TLR6/LYN/STAP1/IRF5/NR4A1/PLCG2/LILRB1/TRIB1/LGALS9/CNR2/PRKCE/ACP5/PDE4B/GSTP1/IRAK2/CD55/FOS/NFKB2/PELI1/AKIRIN2/PCK2/CDK19/RIPK2/MAP2K3/CASP9/PTPN6/HDAC5/IRAK1/BCL10/TAP2/ADAM17/GPX1/TNIP1/PAF1/FOXP1/HMGB1/IFNAR1/OTUD5/RHOA/NFKBIA/PABPN1/CCR7	52
celltypes.B cell.up	celltypes	B cell	up	BP	GO:0051223	regulation of protein transport	62/1250	383/14457	0.16188	1.87224	5.32234	9.62926e-07	7.4289e-05	6.49313e-05	DERL3/ALOX5/HLA-DRB1/BLK/CD200/PRKCE/PKIG/RIPOR1/PRKCB/RHBDF2/ITPR1/PFKFB2/SIDT2/GNAZ/PPP3CA/RUFY3/NADK/PFKL/HIF1A/RAB11FIP1/PCK2/PRKCD/UBE2J1/CYP51A1/SNX3/OAZ2/UCP2/LYPLAL1/SP100/PFKM/SMAD3/CD81/SOX4/BARD1/PARD6A/PIM3/PTPN1/KIF20B/SLC12A2/ADORA2A/CD38/LYPLA1/FAM76B/CHP1/OAZ1/ARFIP1/NR1H2/IRS2/EDEM1/TCIRG1/PRKAR1A/ARF6/RAB8A/GRIPAP1/SCFD1/VPS35/DNAJA1/CD2AP/ENSA/FOXO1/PRP4K/RAN	62
celltypes.B cell.up	celltypes	B cell	up	BP	GO:0009615	response to virus	60/1250	371/14457	0.161725	1.87045	5.22532	1.48635e-06	0.000109756	9.59309e-05	WDFY4/RNASE6/POU2AF1/CD40/IRF5/LILRB1/LGALS9/AIM2/UNC93B1/PMAIP1/CXCR4/IFNGR2/BCL2/APOBEC3F/POU2F2/BCL3/OAS1/ODC1/IFIT2/DUS2/ISG20/NPC2/HIF1A/IFIT3/TRIM34/MAP3K14/TREX1/APOBEC3C/IFIH1/TRIM38/IFNGR1/LAMTOR5/CGAS/STAT2/TBK1/SMAD3/RIPK3/IRF1/TANK/EIF2AK4/IRF9/UBE2W/IFI16/TRAF3/APOBEC3D/BST2/IRF7/POLR3K/TRIM26/DTX3L/NT5C3A/RIOK3/TRIM44/IFNAR1/BANF1/AUP1/CD2AP/MORC3/PHB2/DHX9	60
celltypes.B cell.up	celltypes	B cell	up	BP	GO:0140895	cell surface toll-like receptor signaling pathway	18/1250	60/14457	0.3	3.46968	5.89736	1.77718e-06	0.000129384	0.000113086	SCIMP/TLR6/LYN/PRKCE/PIK3AP1/OAS1/IRAK2/PELI1/RIPK2/TBK1/SQSTM1/APPL1/IRAK1/TRAF3/WDFY1/MFHAS1/CYBA/NFKBIA	18
celltypes.B cell.up	celltypes	B cell	up	BP	GO:0001776	leukocyte homeostasis	25/1250	104/14457	0.240385	2.78019	5.60518	1.92817e-06	0.000134686	0.00011772	TNFRSF13B/BTK/MEF2C/GAPT/CD74/LYN/LGALS9/AIM2/PMAIP1/PDE4B/BCL2/IL2RA/HIF1A/BCL2L11/SLC15A4/SLC39A3/SKIL/RIPK3/SH2B3/BCL10/TSC22D3/ADAM17/TCIRG1/GPR183/HMGB1	25
celltypes.B cell.up	celltypes	B cell	up	BP	GO:0002443	leukocyte mediated immunity	58/1250	360/14457	0.161111	1.86335	5.10329	2.50982e-06	0.000166324	0.000145373	IGLL5/FCGR2B/BTK/SCIMP/CD19/HLA-DRA/HLA-DRB1/CD40/SYK/CD74/LYN/SWAP70/STAP1/PLCG2/CTSH/LILRB1/LGALS9/GAB2/CCR6/UNC93B1/CALHM6/LAT2/STX7/CR2/IL4R/BCL3/CD55/INPP5D/DUSP22/TREX1/PLEKHM2/SNAP23/PRKCD/RFTN1/CR1/SLC15A4/TFRC/GRB2/STAT6/CD81/RIPK3/PTPN6/PRDX1/BCL10/SLAMF1/BCL6/TAP2/ADAM17/BST2/IRF7/TP53BP1/TCIRG1/TUBB4B/LIG4/HMGB1/FCMR/GNL1/KMT2E	58
celltypes.B cell.up	celltypes	B cell	up	BP	GO:0071887	leukocyte apoptotic process	25/1250	108/14457	0.231481	2.67722	5.38231	4.01258e-06	0.000259263	0.000226605	BTK/MEF2C/CD74/LYN/LILRB1/LGALS9/HSH2D/BCL2/IL2RA/BCL3/ST6GAL1/HIF1A/BCL2L11/CASP9/RIPK3/BCL10/TSC22D3/IRS2/BCL6/FNIP1/ADAM17/IRF7/FOXP1/PRKD2/CCR7	25
celltypes.B cell.up	celltypes	B cell	up	BP	GO:0031349	positive regulation of defense response	68/1250	456/14457	0.149123	1.72469	4.83766	5.69645e-06	0.000354758	0.000310072	TLR10/BTK/SCIMP/MEF2C/LRRK2/SYK/TLR6/LYN/STAP1/PLCG2/IRF4/PRKCE/TASL/AIM2/UNC93B1/PIK3AP1/FCRL3/EMILIN2/MAP3K8/CTSS/OAS1/LACC1/BIRC3/IRAK2/GRN/PELI1/AKIRIN2/TREX1/RFTN1/IFIH1/SLC15A4/NAGK/RIPK2/WASHC4/GRAMD4/TIFA/ALOX5AP/CGAS/LYPLAL1/TBK1/PARP1/CD81/IRF1/SQSTM1/APPL1/IFI16/IRAK1/SEC14L1/TRAF3/BCL10/WDFY1/IRF7/TNIP1/MFHAS1/CYBA/HMGB1/DDX41/NEAT1/RIOK3/BANF1/NFKBIA/GPS2/PHB2/DHX9/SFPQ/CD47/XRCC6/CC…	68
celltypes.B cell.up	celltypes	B cell	up	BP	GO:1902105	regulation of leukocyte differentiation	49/1250	295/14457	0.166102	1.92107	4.91718	6.36457e-06	0.000391648	0.000342315	FCGR2B/BTK/HLA-DRA/HLA-DRB1/CD83/SYK/CD74/LYN/LILRB1/TRIB1/HLA-DOA/IRF4/LGALS9/DTX1/FCRL3/NOTCH2/SMARCB1/IL2RA/IL4R/RASSF2/PPP3CA/ZFP36L1/BTN2A2/RB1/INPP5D/FOS/RNF41/CR1/RIPK2/SOX4/SOCS5/IRF1/PTPN6/ARID1B/IKZF3/BCL6/IRF7/TOB2/CLPTM1/BRD4/FOXP1/HMGB1/BRD2/SMARCD2/SMARCE1/RHOA/TMEM131L/QKI/XRCC6	49
celltypes.B cell.up	celltypes	B cell	up	BP	GO:0002440	production of molecular mediator of immune response	38/1250	208/14457	0.182692	2.11295	4.97383	7.49027e-06	0.000455497	0.000398121	IL13RA1/FCGR2B/BTK/SCIMP/CD22/CD40/SYK/CD74/SWAP70/IRF5/PLCG2/LILRB1/CCR6/ACP5/CALHM6/FCRL3/IL4R/LACC1/TCF3/CD55/TREX1/UBE2J1/CR1/SLC15A4/TFRC/RIPK2/STAT6/CGAS/CD81/LAPTM5/BCL10/SLAMF1/BCL6/BST2/TP53BP1/LIG4/CTNNBL1/PHB2	38
celltypes.B cell.up	celltypes	B cell	up	BP	GO:0031348	negative regulation of defense response	41/1250	232/14457	0.176724	2.04392	4.93131	7.7664e-06	0.000461431	0.000403308	FCGR2B/ALOX5/HLA-DRB1/SYK/LYN/DTX4/LILRB1/CD200/LGALS9/ACP5/NT5E/IL2RA/RHBDF2/OAS1/GSTP1/PARP14/GRN/RB1/INPP5D/TREX1/PRKCD/CR1/TRIM38/GRB2/STAT2/PARP1/SMAD3/SOCS5/PTPN6/ADORA2A/YWHAZ/IFI16/FAM76B/NR1H2/GPX1/MFHAS1/VPS35/DDX39A/BANF1/GPS2/PSMB4	41
celltypes.B cell.up	celltypes	B cell	up	BP	GO:0071216	cellular response to biotic stimulus	38/1250	210/14457	0.180952	2.09282	4.90766	9.42875e-06	0.000553832	0.000484069	CD180/TLR10/LY86/FCGR2B/BTK/SCIMP/MEF2C/IRF8/CD40/SYK/TLR6/LYN/STAP1/PLCG2/LILRB1/TRIB1/PRKCE/NOTCH2/PDE4B/EIF2AK3/GSTP1/IRAK2/CD55/CDK19/RIPK2/MAP2K3/PTPN6/HDAC5/IRAK1/BCL10/FBH1/TNIP1/PAF1/HMGB1/DDIT3/RHOA/NFKBIA/PABPN1	38
celltypes.B cell.up	celltypes	B cell	up	BP	GO:0051091	positive regulation of DNA-binding transcription factor activity	33/1250	173/14457	0.190751	2.20615	4.90996	1.1581e-05	0.000665136	0.000581353	BTK/ROR1/PLCG2/CD200/LGALS9/AIM2/ARID5B/SMARCB1/TCF3/IRAK2/TRIM34/TRIM38/LAMTOR5/TFRC/CAMK1D/RIPK2/SP100/SMAD3/TRAF5/RIPK3/HDAC5/IRAK1/BCL10/MTPN/TP53BP1/TRIM26/DDIT3/ARHGEF2/CIB1/PRKD2/PTEN/PHB2/DHX9	33
celltypes.B cell.up	celltypes	B cell	up	BP	GO:0009267	cellular response to starvation	34/1250	181/14457	0.187845	2.17254	4.88362	1.20886e-05	0.00068666	0.000600166	LRRK2/PMAIP1/RIPOR1/CDKN1A/BCL2/TFEB/SLC2A1/EIF2AK3/NUAK2/FOS/RALB/SESN3/SRD5A1/FADS1/PLIN3/CHKA/MIOS/UCP2/PIK3C2B/CLEC16A/SREBF2/DNAJC15/GLUL/VPS41/EIF2AK4/YWHAZ/IFI16/FNIP1/PPM1D/CPEB4/RRAGC/SP1/GABARAP/FOXO1	34
celltypes.B cell.up	celltypes	B cell	up	BP	GO:0140894	endolysosomal toll-like receptor signaling pathway	14/1250	45/14457	0.311111	3.59819	5.37021	1.5656e-05	0.000870169	0.000760559	SCIMP/TASL/UNC93B1/PIK3AP1/FCRL3/OAS1/PELI1/RFTN1/SLC15A4/WASHC4/GRAMD4/IRAK1/WDFY1/HMGB1	14
celltypes.B cell.up	celltypes	B cell	up	BP	GO:0002700	regulation of production of molecular mediator of immune response	33/1250	176/14457	0.1875	2.16855	4.79845	1.68078e-05	0.000895663	0.000782842	IL13RA1/FCGR2B/BTK/SCIMP/CD22/CD40/SYK/CD74/IRF5/PLCG2/LILRB1/ACP5/CALHM6/FCRL3/IL4R/LACC1/CD55/TREX1/UBE2J1/CR1/SLC15A4/TFRC/RIPK2/STAT6/CGAS/CD81/LAPTM5/BCL10/SLAMF1/BCL6/BST2/TP53BP1/PHB2	33
[truncated: 4,729 more rows]

## Sheet: Bcell
unique_cluster	comparison	cluster	dir	ONTOLOGY	ID	Description	GeneRatio	BgRatio	RichFactor	FoldEnrichment	zScore	pvalue	p.adjust	qvalue	geneID	Count
[truncated: 6,028 more rows]

## Sheet: CD4
unique_cluster	comparison	cluster	dir	ONTOLOGY	ID	Description	GeneRatio	BgRatio	RichFactor	FoldEnrichment	zScore	pvalue	p.adjust	qvalue	geneID	Count
[truncated: 10,198 more rows]

[truncated: 2 more sheets: CD8, NK]
