# Supplementary material
Source: Research Square preprint supplement (doi:10.21203/rs.3.rs-9529401/v1)
Supplement: Supplementary file 12 [file e8ad11cb53c49038ce8ef390.xlsx]

## Sheet: Sheet 1
Direction	ONTOLOGY	ID	Description	GeneRatio	BgRatio	RichFactor	FoldEnrichment	zScore	pvalue	p.adjust	qvalue	geneID	Count
up	BP	GO:0050900	leukocyte migration	114/2140	395/18805	0.288608	2.53611	11.0566	9.72516e-22	5.87886e-18	4.27088e-18	PREX1/ST3GAL4/CH25H/CSF1R/EXT1/C5AR1/PIP5K1C/EPS8/PADI2/GPR18/MMP2/RIN3/ROCK1/FUT7/CAMK1D/ASCL2/PLCB1/LGMN/P2RX4/ICAM1/CHST2/ADTRP/EDN2/TGFB2/GDF15/SYK/PDGFD/PIK3R1/IL1B/PTK2B/FCER1G/NLRP12/CCR2/ITGA9/PTAFR/ADAM17/HMGB1/CCL25/DUSP1/GCNT1/ALOX5/S100A12/TBX21/LYVE1/PGF/NINJ1/CCR1/PDE4B/FPR2/CRTAM/IL10/SELPLG/ADAM8/HMOX1/STK10/VEGFA/CXCL16/PLEC/CSF1/TREM1/NUP85/KITLG/SRC/GPR183/LYST/FLT1/SFTPD/RTN4/…	114
up	BP	GO:0042330	taxis	118/2140	468/18805	0.252137	2.21562	9.54304	2.33173e-17	5.67291e-14	4.12127e-14	PREX1/XCR1/CH25H/CSF1R/C5AR1/PIP5K1C/FPR1/PADI2/GPR18/MMP2/ABCC1/RIN3/CASR/PIK3CB/PLAU/CAMK1D/LGMN/P2RX4/EDN2/TGFB2/SYK/PDGFD/IL1B/PTK2B/FCER1G/PROK2/PDGFRB/CCR2/ITGA9/PRKCD/PTAFR/ADAM17/HMGB1/CCL25/LPAR1/FPR3/NOTCH1/DOCK2/DUSP1/ACKR3/ALOX5/HBEGF/S100A12/PGF/NINJ1/CCR1/PDE4B/FPR2/ENG/IL10/ENPP2/ADAM8/VEGFA/F3/EPHA2/CXCL16/PLEC/HGF/CSF1/ARHGEF16/TREM1/NUP85/GPNMB/GPR183/FES/LYST/FLT1/SFTPD/PLP2/TR…	118
up	BP	GO:0002274	myeloid leukocyte activation	78/2140	251/18805	0.310757	2.73074	9.89189	2.81534e-17	5.67291e-14	4.12127e-14	PREX1/CD93/C5AR1/UNC13D/NDRG1/CRLF2/DCSTAMP/EDN2/SLC11A1/LILRA2/CD300LF/SYK/CEBPA/LAT2/GAB2/IL31RA/FCER1G/PLA2G4A/HAVCR2/CCR2/PRKCD/PTAFR/HMGB1/CLNK/FGR/MILR1/DOCK2/PRKCE/S100A12/IFNGR1/ITGAM/RAB44/IFNGR2/LCP2/IL10/SPI1/FCAR/CSF1/BPI/RBPJ/PRG3/SRC/FCGR3A/FES/TLR4/LDLR/PTGDS/STK39/LYN/PIK3CD/TGFBR2/MMP8/MIR181C/AIF1/LILRB4/IL15/MYO18A/CHGA/PTPRC/PLCG2/CAMP/MAPT/MYD88/LTBR/TLR2/ITGB2/STXBP2/TGFB1/A…	78
up	BP	GO:0050727	regulation of inflammatory response	111/2140	442/18805	0.251131	2.20679	9.20024	2.88413e-16	3.48691e-13	2.53318e-13	CD28/CD200R1L/IL10RA/MIR199A1/ABCC1/AOAH/DAGLA/FUT7/RHBDF2/NEAT1/MGLL/NLRP3/PPARG/CASP4/PARK7/KLF4/AIM2/SYK/CEBPA/IL1RL2/IL1B/NLRP12/CCR2/PSMA1/PRKCD/FGR/LPL/DAGLB/CASP12/HLA-E/ALOX5/TNFAIP3/S100A12/PTGES/BCL6/NINJ1/MIR21/NUPR1/FPR2/PPARD/IL10/ADAM8/MIR181B1/SMPDL3B/PTGS2/MMP9/PSMA6/HGF/ALOX5AP/LILRA5/TNFRSF1A/MAP3K8/EXTL3/MAPK7/SRC/CEBPB/TLR4/LDLR/NLRC4/IL22RA2/PTGIS/OSM/F12/SCGB1A1/FFAR2/CCL1/S…	111
up	BP	GO:0006909	phagocytosis	71/2140	238/18805	0.298319	2.62145	9.02089	7.89487e-15	5.30272e-12	3.85233e-12	P2RY6/CD93/NCF4/PIP5K1C/UNC13D/FCN1/CAMK1D/CEACAM4/GSN/ABCA7/COLEC12/SLC11A1/CD300LF/SYK/FCER1G/P2RX7/CD36/CCR2/PRKCD/HMGB1/MYO7A/FGR/NCF2/RAB20/MARCO/DOCK2/AXL/CLEC7A/PRKCE/CD302/SCARB1/ITGAM/FPR2/RAB31/RARA/MIR181B1/ICAM3/CORO1C/IRF8/TGM2/SRC/LYST/TLR4/SFTPD/LDLR/SIRPB1/MSR1/ADORA2A/LYN/FCGR2A/RAB11FIP2/ARHGAP12/AIF1/PECAM1/IL15/MYO18A/PTPRC/PLCG2/IL2RB/CRYBA1/PTX3/PLD2/MYD88/TLR2/ITGB2/TGFB1/H…	71
up	CC	GO:0098857	membrane microdomain	80/2231	293/19880	0.273038	2.43298	8.78573	1.74171e-14	1.19307e-11	1.01936e-11	EFNB1/SDCBP/MYOF/RHOQ/ABCG2/CD244/INPP5D/ICAM1/ADTRP/PARK7/PRNP/HAS2/LAT2/GAB2/OLR1/CD36/SLC1A2/ADAM17/EFHD2/ANXA2/FLOT1/TPP1/ASAH2/SCARB1/KCNE3/ITGAM/LCP2/ENTPD1/SELPLG/CTSD/CTNNA1/PTGS2/CDH2/CORO1C/VCL/GP6/TNFRSF1A/KCNMA1/SRC/MYO1A/NFAM1/PRKAR2A/PTGIS/KCNA3/AHNAK/LYN/FURIN/PACSIN2/THY1/TGFBR2/HK1/TNFRSF1B/EFNA5/PECAM1/PODXL/PTPRC/PLCG2/MAPT/EHD2/BEST1/KCNQ1/INSR/TLR2/ITGB2/SLC9A1/RAP2B/CTNNB1/H…	80
up	BP	GO:0030098	lymphocyte differentiation	104/2140	432/18805	0.240741	2.11548	8.40511	4.99685e-14	3.0206e-11	2.19441e-11	PREX1/CD28/ZBTB7A/ARID1A/IL9/SMARCA4/CHD7/FGL2/PRDM1/ZBTB16/GPR18/HDAC5/STK11/FOSL2/FUT7/ASCL2/INPP5D/CD86/NLRP3/SRF/CEBPG/CD27/SYK/PIK3R1/IL1RL2/IL1B/INHBA/PTK2B/FCER1G/ZMIZ1/CCR2/ADAM17/HMGB1/PRKCZ/DOCK2/AXL/FZD5/TBX21/BCL6/SYVN1/SOCS1/LIPA/MIR21/LILRB2/CRTAM/IL10/ADAM8/RARA/SPI1/VNN1/SLC46A2/STAT6/TCIRG1/HHEX/ZFP36L2/IRF8/KLF6/SMAD7/TNFSF13B/RBPJ/KCNK18/GPR183/BCL3/NFAM1/MAFB/ICOS/SLAMF8/TNFSF…	104
up	CC	GO:0030667	secretory granule membrane	83/2231	322/19880	0.257764	2.29688	8.34169	1.83338e-13	4.18621e-11	3.57669e-11	CD93/MANBA/C5AR1/FPR1/ATP8B4/CLEC5A/PKDREJ/PLAU/ACRBP/KCNAB2/ITGAX/ABCA3/SLC11A1/AGPAT2/OLR1/FCER1G/MGST1/CD36/PTAFR/CA4/CEACAM3/FCGR3B/ATP8B3/CD59/RAB3D/CD58/LILRB3/SLC15A4/ITGAM/STBD1/MGAM/RAB44/FPR2/LILRB2/RAB31/APLP2/ADAM8/STK10/FCAR/SNAP29/VNN1/VAPA/TCIRG1/CKAP4/LAMTOR3/DSC1/NFAM1/TRPM2/PSAP/SIRPB1/CD9/LHFPL2/DNAJC5/LGALS3/TMED10/SERPINB6/PLAUR/HVCN1/ATP11A/FCGR2A/LAIR1/STX3/TNFRSF1B/SLC18A1…	83
up	BP	GO:0043410	positive regulation of MAPK cascade	106/2140	464/18805	0.228448	2.00746	7.87419	1.02523e-12	4.13169e-10	3.0016e-10	P2RY6/SDCBP/CSF1R/C5AR1/CASR/ROCK1/TGFA/ADRA1D/PLCB1/ERN1/ICAM1/CD27/ABCA7/DUSP22/TGFB2/GDF15/SH3RF2/SYK/PDGFD/IL1B/INHBA/PTK2B/P2RX7/CD36/PDGFRB/HAVCR2/LIF/HMGB1/LPAR1/MARCO/NOTCH1/MIRLET7B/PRKCZ/SPRY2/ACKR3/NENF/MINK1/PRKCE/S100A12/PDGFC/CCR1/PDE8B/MIR21/GADD45G/FPR2/TNIK/SERPINF2/PIK3R5/ADAM8/SPI1/TP73/MIR181B1/VEGFA/CDH2/CCDC88C/HGF/CARD9/LILRA5/LAMTOR3/SRC/GPNMB/GPR183/FLT1/TLR4/RASSF2/OSM/R…	106
up	BP	GO:0070661	leukocyte proliferation	81/2140	344/18805	0.235465	2.06912	7.17147	1.03809e-10	2.09174e-08	1.51961e-08	EFNB1/CD28/IL9/CSF1R/FOSL2/INPP5D/CD86/PRNP/CSF2RB/SLC11A1/TYK2/SYK/IL1B/ITCH/P2RX7/HAVCR2/CCR2/PRKCD/CCND3/HMGB1/DOCK2/CCDC88B/OCSTAMP/HLA-E/TNFAIP3/BCL6/MNDA/LIPA/MIR21/DLG5/LILRB2/CRTAM/IL10/CSF2RA/CD70/MIR181B1/LMO1/STAT6/TCIRG1/CSF1/HHEX/TNFSF13B/KITLG/GPNMB/GPR183/FCGR3A/CEBPB/TLR4/SFTPD/SCGB1A1/LGALS3/GSTP1/TNFSF8/TNFSF18/RAG2/IL1A/LYN/BCL2/HLA-DPB1/TGFBR2/MEF2C/TNFRSF1B/MIR181C/AIF1/IL2/H…	81
up	BP	GO:0045937	positive regulation of phosphate metabolic process	105/2140	493/18805	0.212982	1.87155	7.02714	1.12279e-10	2.12102e-08	1.54088e-08	P2RY6/SDCBP/CSF1R/CCDC88A/STK11/DAB2/ROCK1/TGFA/CD244/ERN1/ADTRP/PARK7/PRNP/CCND2/TGFB2/SYK/IL1B/IL31RA/PTK2B/P2RX7/CD36/PDGFRB/PRKCD/PTAFR/CCND3/LIF/ADAM17/SRCIN1/SPRY2/ACSL3/FLOT1/SLCO3A1/HBEGF/S100A12/CSNK1D/PID1/LIMK2/ANGPT4/DHX34/MIR21/ARHGEF2/LCP2/TNIK/PIK3R5/ENPP2/CTF1/VEGFA/MMP9/LILRA5/ATG14/FNIP2/KITLG/KIF14/SRC/GPNMB/FLT1/TLR4/RASSF2/OSM/TNFRSF10B/PRKAG2/RIPK1/NEDD9/TNFSF18/PLAUR/ACVR2A…	105
up	MF	GO:0140375	immune receptor activity	49/2171	156/18639	0.314103	2.69671	7.72668	3.36167e-11	4.36009e-08	3.61999e-08	IL10RA/XCR1/C5AR1/FPR1/CTSH/CRLF2/LILRA1/CSF2RB/LILRA2/IL1RL2/IL31RA/FCER1G/CCR2/FPR3/ACKR3/FCGR3B/CCR1/IFNGR1/LILRB3/LILRA6/FPR2/IFNGR2/LILRB2/IL1RAP/CSF2RA/FCAR/F3/IL1R2/IL3RA/LILRA5/GPR35/FCGR3A/IL22RA2/KLRK1/IL12RB2/IFNAR1/CD200R1/CXCR6/CCR6/FCGR2A/IL13RA1/C5AR2/LILRB4/CSF3R/IL2RB/CMKLR1/CXCR4/IL7R/CD44	49
up	CC	GO:0005925	focal adhesion	91/2231	424/19880	0.214623	1.91246	6.75238	6.64269e-10	7.58374e-08	6.47954e-08	ANXA6/FLNB/SDCBP/ANXA5/ARL14EP/PIP5K1C/ASAP3/DAB2/PLAU/GSN/ICAM1/ARHGAP31/EHD3/CAPN5/PTK2B/ACTG1/ACTN4/PDGFRB/PDLIM7/ADAM17/FLOT1/VASP/CD59/FAP/PDIA3/ENG/ARHGEF2/MPRIP/ARHGAP22/CTNNA1/ALOX15B/DST/CDH2/EPHA2/LIMD1/CORO1C/TNS1/VCL/PLEC/LAMTOR3/TNFSF13B/ARHGAP26/ITGB4/TGM2/SRC/RPS9/FES/FLT1/HSPA1A/PRKAR2A/STARD8/CD9/MRC2/GNA13/ACTN1/NEDD9/AHNAK/FZD1/PLAUR/PDCD6IP/PACSIN2/THY1/PARVG/GNB2/SRP68/CSPG4/…	91
up	BP	GO:0002833	positive regulation of response to biotic stimulus	92/2140	425/18805	0.216471	1.90221	6.74153	6.71507e-10	9.76286e-08	7.09254e-08	KCNK13/TRIL/IRAK1/LATS2/FCN1/CLPB/RASGRP4/NLRP3/COLEC12/AIM2/CPT1A/LILRA2/CD300LF/SYK/TIFAB/PIK3R1/ITCH/P2RX7/CD36/HAVCR2/HMGB1/CLNK/SLC19A1/FLOT1/HLA-E/TNFAIP3/CADM1/CLEC7A/PRKCE/NINJ1/MNDA/SLC15A4/SMPDL3A/FPR2/IRAK2/RBM47/CRTAM/PTPRS/ADAM8/MAPKAPK2/SPI1/SMPDL3B/SLC46A2/ZDHHC3/CARD9/SIGLEC16/UNC93B1/SRC/TLR4/RTN4/GRAMD4/HSPA1A/NLRC4/OASL/RNF144A/KLRK1/IKBKE/FFAR2/BPIFB1/AKIRIN2/TLR5/EMILIN2/LYN/…	92
up	BP	GO:0051090	regulation of DNA-binding transcription factor activity	75/2140	332/18805	0.225904	1.9851	6.48949	3.64736e-09	4.32319e-07	3.14072e-07	ZBTB7A/COMMD6/SMARCA4/HDAC5/IRAK1/BHLHE40/CAMK1D/TFDP1/TRIB1/NLRP3/SRF/CEBPG/PRNP/AIM2/SYK/IL1B/NLRP12/ITCH/HAVCR2/TRIM14/PRKCZ/SLCO3A1/TNFAIP3/CLEC7A/S100A12/RIPK4/SGK3/MIR21/NUPR1/ARHGEF2/IRAK2/IL10/SPI1/PSMA6/FANK1/CARD9/DAP/BCL3/TLR4/HSPA1A/NLRC4/PTGIS/RIPK1/FOXS1/FZD1/TNFSF18/RNF220/EDN1/ESR1/AR/IKBKG/CRTC1/TRIM40/S100A8/PLCG2/HSF1/CTNNBIP1/MYD88/SUFU/TLR2/CAPN3/CMKLR1/TCF7L2/PTEN/HCK/CYP1B1…	75
up	BP	GO:0002697	regulation of immune effector process	88/2140	414/18805	0.21256	1.86785	6.3984	4.03299e-09	4.68835e-07	3.406e-07	CD28/TRIL/UNC13D/GFER/FGL2/FUT7/FCN1/ASCL2/CD244/INPP5D/RASGRP4/CD86/NLRP3/ICAM1/LITAF/DUSP22/TGFB2/SYK/IL1B/GAB2/P2RX7/CD36/HAVCR2/CCR2/PTAFR/HMGB1/CLNK/FGR/PRKCZ/AXL/HLA-E/CADM1/CLEC7A/CD59/FZD5/TBX21/BCL6/MIR21/SLC15A4/ITGAM/CRTAM/IL10/RARA/MAPKAPK2/SPI1/STAT6/CARD9/SMAD7/SLC7A5/SECTM1/FES/TLR4/RTN4/KLRK1/FFAR2/LGALS3/SLAMF8/TNFSF18/A2M/LYN/IL13RA1/HK1/TNFRSF1B/IL2/LILRB4/MYO18A/IFNL1/PTPRC/PL…	88
up	BP	GO:0048771	tissue remodeling	51/2140	192/18805	0.265625	2.33415	6.65849	4.28483e-09	4.88713e-07	3.55041e-07	MIR199A1/DOCK5/CSF1R/SNX10/CHD7/EXT1/MMP2/ROCK1/FOSL2/INPP5D/DCSTAMP/PPARG/SIGLEC15/SYK/PTK2B/P2RX7/CCR2/LIF/AXL/TPP1/TNFAIP3/RAB3D/LIPA/ADAM8/EPHA2/TCIRG1/JAG1/RBPJ/SRC/GPNMB/PDK4/RASSF2/CST3/FOXC2/IL1A/ADRB2/MEF2C/IL2/CSPG4/SEMA3C/IL15/NDP/PLEKHM1/TGFB1/CTNNB1/EPAS1/RAB7A/TFRC/PTH1R/TIMP1/MITF	51
up	BP	GO:0002367	cytokine production involved in immune response	38/2140	127/18805	0.299213	2.6293	6.60185	1.23525e-08	1.24451e-06	9.04115e-07	TRIL/NLRP3/LITAF/TGFB2/SYK/IL1B/P2RX7/CD36/CCR2/CLNK/PRKCZ/AXL/HLA-E/CLEC7A/FZD5/TBX21/BCL6/IL10/MAPKAPK2/CARD9/SMAD7/TREM1/SLC7A5/SECTM1/TLR4/RTN4/FFAR2/HK1/TNFRSF1B/LILRB4/PLCG2/MYD88/TGFB1/CD226/IRAK3/RABGEF1/SEMA7A/CD7	38
up	BP	GO:0042060	wound healing	92/2140	450/18805	0.204444	1.79653	6.1286	1.35295e-08	1.31912e-06	9.58317e-07	ANXA5/ST3GAL4/SLC4A1/EXT1/PIK3CB/MYOF/F2RL3/PLAU/ELK3/PPARG/SRF/ADTRP/TGFB2/SLC11A1/SYK/FCER1G/PLA2G4A/CD36/ACTG1/PRKCD/ADAM17/MYL9/AXL/ANXA2/ALOX5/TNFAIP3/GNAQ/HBEGF/CLEC7A/ANO5/PRKCE/CD59/FAP/SERPINE2/SCARB1/ANGPT4/ERBB3/HGFAC/COL5A1/PDIA3/ENG/PPARD/ENTPD1/SERPINF2/HMOX1/VEGFA/F3/DST/RREB1/LRG1/VCL/PLEC/PAPSS2/GP6/SRC/TLR4/F12/KANK1/CD9/FOXC2/ANGPTL6/GNA13/ADORA2A/RHOC/AHNAK/EMILIN2/IL1A/PLAUR/…	92
up	MF	GO:0038024	cargo receptor activity	25/2171	65/18639	0.384615	3.30209	6.7505	2.41113e-08	1.56362e-05	1.2982e-05	DAB2/ABCA7/COLEC12/OLR1/CD36/SORL1/MARCO/ACKR3/LYVE1/SCARB1/ITGAM/STBD1/ENPP2/CXCL16/LGALS3BP/LDLR/STAB1/LRP12/MRC1/MSR1/SDC1/ASGR2/INSR/ITGB2/TFRC	25
up	BP	GO:0022604	regulation of cell morphogenesis	56/2140	247/18805	0.226721	1.99228	5.62532	2.97828e-07	1.71464e-05	1.24565e-05	CDC42EP4/CSF1R/EPS8/RIMS1/FGD4/BAIAP2/RHOQ/SLC30A1/FMNL2/EPB41L3/CUX2/PTK2B/FGR/LPAR1/DBN1/CAPZB/WTIP/MIR21/CDC42EP2/CDC42EP3/C15orf62/ENPP2/VEGFA/RREB1/LIMD1/CORO1C/SRC/FES/ITPKA/NEDD4L/NTNG2/PALM/KANK1/CPNE9/GNA13/PARVG/ARHGAP15/PLXNC1/RHOBTB2/EFNA5/AGO4/MYO10/PLXND1/FGD2/F11R/ITGB2/MARK2/HCK/RASAL1/CXCR4/PARVB/CCL2/WDR1/CD44/MFSD2A/P2RY1	56
up	BP	GO:0001666	response to hypoxia	67/2140	316/18805	0.212025	1.86315	5.545	3.11965e-07	1.7739e-05	1.28871e-05	GATA6/NDRG1/MMP2/CASR/PIK3CB/PLOD2/IRAK1/FOSL2/PLAU/ASCL2/PPARG/SRF/MALAT1/TGFB2/NPEPPS/CPT1A/INHBA/PTK2B/LIF/ADAM17/NOTCH1/WTIP/PMAIP1/PRKCE/PGF/ANGPT4/HK2/MIR21/ENG/PPARD/ADAM8/VEGFA/PTGS2/LIMD1/TERT/KCNMA1/MYC/SRC/RTN4/DNMT3A/LMNA/PTGIS/UCN3/MB/FOXO3/IL1A/ANGPTL4/BCL2/EDN1/BMP2/F7/DDIT4/MGARP/ITPR2/HSF1/TRPV4/NDP/TLR2/SLC9A1/TGFB1/ZFP36L1/EPAS1/CREBBP/MIR223/CXCR4/HIPK2/TFRC	67
up	BP	GO:0001776	leukocyte homeostasis	32/2140	114/18805	0.280702	2.46663	5.62843	8.41089e-07	3.94138e-05	2.86334e-05	PIK3CB/AIM2/P2RX7/CCR2/ADAM17/HMGB1/AXL/PMAIP1/TNFAIP3/SLC40A1/LIPA/SLC15A4/PDE4B/FCAR/LMO1/SLC46A2/TCIRG1/CSF1/HCAR2/TNFSF13B/KITLG/GPR183/LYN/BCL2/PIK3CD/MEF2C/IL2/TGFB1/SH2B2/LGALS2/IL7R/PPP2CA	32
up	BP	GO:0045927	positive regulation of growth	56/2140	259/18805	0.216216	1.89997	5.22618	1.49269e-06	6.18035e-05	4.48991e-05	SDCBP/IL9/MIR199A1/CHD7/RIMS1/GATA6/BMP10/PLCB1/SRF/TGFB2/PTK2B/ADAM17/NOTCH1/CACNA2D2/HBEGF/MKKS/PPARD/ACSL4/VEGFA/CXCL16/CSF1/TFCP2L1/EXTL3/SMAD7/RBPJ/PRSS2/MAPKAP1/NEDD4L/CPNE9/PPM1F/FOXS1/ZFPM2/RAG2/BCL2/EDN1/GHRH/MEF2C/IL2/EFNA5/S100A8/MAPT/INSR/SLC9A1/RPS6KA3/CAPN3/BASP1/MIR548C/RASAL1/CXCR4/S100A9/SLC6A3/PIM1/SEMA7A/SPHK1/MFSD2A/BMPR1A	56
up	BP	GO:0046434	organophosphate catabolic process	53/2140	242/18805	0.219008	1.92451	5.1871	1.88005e-06	7.28518e-05	5.29254e-05	ZBTB7A/SLC4A1/BCL2L13/PLCB1/PLB1/PLA2G4A/P2RX7/PRKCD/PLBD1/OGDH/PDE4D/GPD1L/SCARB1/PDE8B/HK2/LIPA/NUPR1/PDE4B/SMPDL3A/ENTPD1/ENPP2/NT5M/SMPDL3B/VNN1/SAMHD1/MLYCD/SUCLA2/UPB1/LIPC/SRC/PNPLA6/LDLR/NUDT16/HK3/FOXK1/PRKAG2/HK1/GDE1/DDIT4/GPCPD1/AMPD3/PLCG2/ABHD12/IER3/INSR/PLD2/PDE4A/INPP5F/FBP1/PFKFB3/PPP2CA/UPP1/NTSR1	53
up	MF	GO:0019955	cytokine binding	39/2171	144/18639	0.270833	2.32522	5.79632	2.89782e-07	7.67104e-05	6.36892e-05	IL10RA/XCR1/CSF1R/SOST/GREM2/CRLF2/PARK7/IL31RA/IL1RN/CD36/CCR2/ADAM17/HMGB1/ACKR3/CCR1/IFNGR1/ENG/CSF2RA/IL1R2/NRROS/LRG1/IL3RA/TNFRSF1A/TRIM16/PLP2/IL22RA2/IL12RB2/IFNAR1/CXCR6/CCR6/A2M/TGFBR2/MMP8/IL13RA1/TNFRSF1B/CSF3R/IL2RB/CXCR4/BMPR1A	39
up	MF	GO:0035091	phosphatidylinositol binding	63/2171	284/18639	0.221831	1.90452	5.5771	2.95722e-07	7.67104e-05	6.36892e-05	SDCBP/NCF4/SNX10/SNX16/CCDC88A/PLEKHF1/SNX21/PLCB1/GSN/PLEKHF2/NLRP3/HIP1/OSBPL5/CYTH3/ZCCHC2/GAB2/PLA2G4A/OSBPL8/TOM1L2/SH3PXD2A/ANXA2/FCGR3B/EEA1/SGK3/SCARB1/STAM/PITPNA/STAM2/PHLDA1/PLEKHA5/ZCCHC14/PHLDA2/SNX33/ADAP1/SNX27/MAPKAP1/FES/DNM1/PARD3B/SH3PXD2B/RAG2/THY1/SNX13/SESTD1/PXK/ESYT3/MYO10/FGD2/ITPR2/MAPT/MYO1E/VILL/KCNQ1/PLD2/SLC9A1/FLII/IQGAP2/ARAP3/SBF2/ZFYVE16/PICALM/GOLPH3/ZFYVE28	63
up	BP	GO:0150115	cell-substrate junction organization	29/2140	103/18805	0.281553	2.47412	5.37571	2.53009e-06	9.19343e-05	6.67885e-05	RCC2/ROCK1/DUSP22/PIK3R1/PTK2B/ACTG1/IQSEC1/VEGFA/DST/CORO1C/TNS1/VCL/PLEC/ITGB4/SRC/RAB8B/ACTN1/PPM1F/APOD/RHOD/THY1/BCL2/EFNA5/CTTN/FMN1/SLC9A1/PTEN/LIMS1/ITGA5	29
up	BP	GO:0034405	response to fluid shear stress	15/2140	36/18805	0.416667	3.66141	5.72759	3.56148e-06	0.00012095	8.78681e-05	MMP2/P2RX4/KLF4/HAS2/PTK2B/P2RX7/PTGS2/PLEC/SMAD7/MAPK7/SRC/SREBF2/MEF2C/XBP1/TGFB1	15
up	BP	GO:0015711	organic anion transport	86/2140	469/18805	0.183369	1.61133	4.80442	4.8318e-06	0.000159608	0.000115952	SLC6A6/SLC25A10/SLC37A2/SLC4A1/SLC7A10/ASIC3/SLC2A9/SLC27A3/ABCC1/CASR/SLC16A3/PLIN2/SLC6A12/ABCG2/PPARG/P2RX4/CACNB4/SLC11A1/CPT1A/SYK/IL1B/SLC25A25/SLCO4A1/SLCO6A1/PLA2G4A/MGST1/P2RX7/CD36/SLC1A2/ABCB11/SLC43A2/ABCC3/CA4/SLC19A1/ACSL3/SLC6A7/SLCO3A1/TTYH3/PTGES/SLC15A4/PPARD/ACSL4/SLC6A15/SLC16A5/SERINC5/PTGS2/SLC16A6/SLC46A2/SLC7A7/AQP9/SLC25A47/SLC38A10/SLC7A5/SLC25A13/ACSL1/SLC7A5P2/TRH/SLC3…	86
up	MF	GO:0005126	cytokine receptor binding	60/2171	275/18639	0.218182	1.87319	5.29663	1.00978e-06	0.000187098	0.000155339	SDCBP/IL9/CCDC88A/SMAD2/TGFB2/TYK2/CD300LF/SYK/PIK3R1/IL1B/ITCH/IL1RN/CCR2/LIF/ADAM17/CCL25/PGF/SOCS1/ENG/IL10/ADAM8/CD70/CTF1/VEGFA/CXCL16/LRG1/CSF1/IL31/SMAD7/TNFSF13B/KITLG/IFNW1/OSM/CCL1/RIPK1/TNFSF8/TLR5/TNFSF18/IL1A/TNFSF10/TGFBR2/RASL11B/IL2/BID/EFNA5/IL15/CISH/IFNL1/IL27/TNFSF15/MYD88/IL20/TGFB1/CLCF1/CCL2/IL37/NES/FASLG/MSMP/ITGA5	60
up	BP	GO:0007492	endoderm development	25/2140	87/18805	0.287356	2.52511	5.10929	8.22378e-06	0.000252349	0.000183327	EXT1/GATA6/SMAD2/MMP2/MESP1/INHBA/NOTCH1/DUSP1/COL8A1/COL5A1/MMP9/HSBP1/LAMB3/MMP8/MAP2K1/ITGB2/CTR9/TGFB1/CTNNB1/ZFP36L1/HMGA2/DUSP4/SSBP3/BMPR1A/ITGA5	25
up	MF	GO:0001221	transcription coregulator binding	32/2171	115/18639	0.278261	2.38899	5.42489	1.72935e-06	0.000280371	0.00023278	ZBTB7A/SMARCA4/BAIAP2/GATA6/ZBTB16/HDAC5/PPARG/EED/SP1/NEK6/BCL6/TRERF1/PPARD/RARA/TP73/TERT/STAT6/MYC/FOXO3/ESR1/PER3/AR/LMO2/ATF7/NR5A2/CTNNB1/RXRA/EPAS1/CREBBP/NR1D1/CHD6/PBX1	32
up	BP	GO:0035265	organ growth	41/2140	181/18805	0.226519	1.99051	4.79835	1.12625e-05	0.0003242	0.000235526	MIR199A1/EXT1/GATA6/SMAD2/FOSL2/BMP10/LATS2/MESP1/TGFB2/MMP13/PSAPL1/NOTCH1/SPRY2/CACNA2D2/CTDP1/RARA/TP73/RBPJ/FES/PSAP/RSPO2/FOXC2/DUSP6/SKI/ZFPM2/RAG2/MIR873/BCL2/TGFBR2/EDN1/MEF2C/ESR1/AR/MIR200B/BASP1/MIR548C/SORBS2/PTEN/BNC2/PIM1/BMPR1A	41
up	CC	GO:0062023	collagen-containing extracellular matrix	78/2231	432/19880	0.180556	1.60889	4.54919	1.43227e-05	0.000327036	0.000279419	ANXA6/ADAMTS3/ANXA5/IGFBP7/FGL2/SDC2/BCAM/SOST/CTSH/MMP2/PLOD2/CTSB/FCN1/ICAM1/COLEC12/TGFB2/GDF15/SMOC1/COL15A1/MARCO/ANXA2/TGFBI/NCAM1/SERPINE2/ANGPT4/COL8A1/COL5A1/ADAMTS8/SERPINF2/CTSD/COL8A2/MMP9/F3/DST/CDH2/VCAN/MFAP4/COL6A5/CLEC3B/FBN2/LAMB3/PRG3/ITGB4/TGM2/LGALS3BP/CTSZ/PSAP/F12/PCSK6/COL24A1/LGALS3/ANGPTL6/EDIL3/SERPINB6/TINAGL1/EMILIN2/A2M/CTSL/ANGPTL4/SERPINB1/MMP8/F7/CSPG4/EFNA5/COL23…	78
up	MF	GO:0005125	cytokine activity	52/2171	234/18639	0.222222	1.90788	5.0743	2.94746e-06	0.000424762	0.000352661	IL9/BMP10/GREM2/TGFB2/GDF15/NAMPT/IL1B/INHBA/IL1RN/LIF/HMGB1/CCL25/VSTM1/IL10/CTF1/VEGFA/CXCL16/CSF1/IL31/TNFSF13B/KITLG/SECTM1/IFNW1/OSM/CCL1/THNSL2/TNFSF8/TNFSF18/IL1A/FAM3C/TNFSF10/EDN1/BMP2/IL2/IL15/IFNL1/WNT6/SLURP1/IL27/TNFSF15/NDP/IL20/IL17C/TGFB1/CLCF1/IL17D/SCG2/CCL2/IL37/FASLG/TIMP1/MSMP	52
up	BP	GO:0070613	regulation of protein processing	19/2140	60/18805	0.316667	2.78267	4.95603	2.18266e-05	0.000542971	0.000394458	PLAU/GSN/PRNP/LDLRAD3/ANXA2/SERPINE2/INPP5B/SERPINF2/ADAM8/IL1R2/CLEC3B/GLG1/SRC/CTSZ/NLRC4/F12/GAS1/PLAUR/FURIN	19
up	BP	GO:0044703	multi-organism reproductive process	45/2140	211/18805	0.21327	1.87409	4.5755	2.21267e-05	0.000546704	0.000397171	AGRP/IGFBP7/PRDM1/MMP2/CTSB/FUT7/IL1B/HAVCR2/PTAFR/LIF/SLC19A1/PNOC/SERPINE2/MIR21/PPARD/ACSL4/RARA/VEGFA/PTGS2/MMP9/PCSK5/TPPP3/FBN2/DAZAP1/ITGB4/FOSB/SCGB1A1/MAFF/ACVR1B/ACVR2A/THBD/BCL2/EDN1/TEAD4/ESR1/AR/RLN1/NDP/PARP1/TGFB1/CORIN/YTHDF3/CLIC5/TIMP1/ITGA5	45
up	BP	GO:0007204	positive regulation of cytosolic calcium ion concentration	38/2140	170/18805	0.223529	1.96424	4.52557	3.17464e-05	0.000746719	0.000542477	XCR1/MIR199A1/C5AR1/FPR1/ADRA1D/P2RX4/SLC8A1/PTK2B/PROK2/P2RX7/CD36/CCR2/HMGB1/LPAR1/FPR3/ACKR3/CCR1/FPR2/SPPL3/JPH3/S1PR3/GPR35/PTGER2/CCL1/GNA13/CXCR6/CCR6/FFAR4/BCL2/EDN1/ESR1/C5AR2/IL2/ABL2/TRPV4/CMKLR1/CXCR4/P2RY1	38
up	BP	GO:0007163	establishment or maintenance of cell polarity	47/2140	228/18805	0.20614	1.81143	4.41736	3.66615e-05	0.000839466	0.000609856	UST/STK11/RHOQ/FSCN3/ROCK1/GSN/CYTH3/CDC42BPB/PRKCZ/DOCK2/SPRY2/HTT/PLEKHG3/DLG5/CLIC4/CRTAM/KIF26B/CTNNA1/DST/TCIRG1/SNX27/FRMD4B/LMNA/KANK1/PARD3B/AMOTL1/PDCD6IP/FBXW11/ANKFN1/PARVG/RAB11FIP2/RHOBTB2/MYO18A/ABL2/UBXN2B/NEK3/SLC9A1/MARK2/MPP7/CRKL/EPHB1/PARVB/NSFL1C/PARD6G/GOLPH3/WDR1/BCCIP	47
up	BP	GO:0032963	collagen metabolic process	28/2140	112/18805	0.25	2.19685	4.55236	4.21938e-05	0.000927496	0.000673808	ADAMTS3/MMP2/CTSB/FOSL2/MMP13/INHBA/P2RX7/NOTCH1/FAP/MIR21/COL5A1/ENG/PPARD/SERPINF2/MMP9/MFAP4/CIITA/PRSS2/CST3/MRC2/CTSL/FURIN/MMP8/MMP10/MMP17/TMEM131/MMP19/TGFB1	28
up	BP	GO:0090075	relaxation of muscle	13/2140	35/18805	0.371429	3.26389	4.80381	6.77939e-05	0.00131351	0.000954237	CAMK2D/GSN/P2RX4/SLC8A1/TIFAB/ATP2A2/PDE4D/PDE4B/CHGA/ADORA2B/SRI/TNNI2/P2RY1	13
up	BP	GO:0009410	response to xenobiotic stimulus	79/2140	453/18805	0.174393	1.53246	4.11076	7.02571e-05	0.00135256	0.000982611	MIR129-1/GATA6/HDAC5/MMP2/ABCC1/SMOX/PLIN2/FOSL2/ABCA3/PRNP/ALDH2/AIM2/AGPAT2/CPT1A/IL1B/PTK2B/P2RX7/SLC1A2/PRKCB/ABCB11/ADAM17/ABCA2/ABCC3/S100A12/LIPA/PDE4B/ENG/IL10/TP73/PTGS2/LPO/CARD9/MYC/SRC/SLC34A1/ACSL1/FOSB/DNMT3A/SCGB1A1/PTPRM/DUSP6/GSTP1/PPM1F/ADORA2A/FOXO3/FZD1/TXNIP/MIR873/LYN/BCL2/TGFBR2/EDN1/MEF2C/TXNRD2/AHRR/SRP68/NCEH1/SEMA3C/HSF1/KCNQ1/TOP1/SLC1A3/SUFU/ALDH3A1/PDE4A/TGFB1/FZD3/F…	79
up	CC	GO:0002102	podosome	14/2231	41/19880	0.341463	3.04271	4.65507	8.95664e-05	0.00146079	0.00124809	DOCK5/DBNL/GSN/SH3PXD2A/ADAM8/VCL/PLEC/SRC/SH3GL1/SH3PXD2B/CTTN/TNS3/FLII/WDR1	14
up	BP	GO:0140894	endolysosomal toll-like receptor signaling pathway	16/2140	50/18805	0.32	2.81196	4.59732	8.31981e-05	0.00153558	0.00111557	IRAK1/COLEC12/HAVCR2/HMGB1/FLOT1/TNFAIP3/SLC15A4/PTPRS/ZDHHC3/UNC93B1/SRC/RTN4/GRAMD4/MYD88/EPG5/TREML4	16
up	BP	GO:1903829	positive regulation of protein localization	85/2140	499/18805	0.170341	1.49685	4.03095	8.88475e-05	0.00162261	0.00117879	USP36/CCDC88A/PTP4A3/CASR/STK11/PLCB1/PTPN9/PPARG/CACNB4/PARK7/PRNP/ABCA7/TGFB2/NPEPPS/CDK5R1/SSH1/TYK2/ABLIM3/PIK3R1/IL1B/P2RX7/PRKCB/TM7SF3/PRKCD/SORL1/TMEM30B/ERGIC3/PRKCZ/ACSL3/GPD1L/PRKCE/PIAS1/FZD5/LIMK2/ITGAM/PPARD/ACSL4/SNX33/ADAM8/VEGFA/PTGS2/EPHA2/TERT/HCAR2/ARHGEF16/PRR5L/SRC/TLR4/RTN4/TRH/FFAR2/LGALS3/TMED10/ADORA2A/NEDD9/UCN3/IL1A/SREBF2/EDN1/STX3/RAB11FIP2/PECAM1/MYO18A/BAIAP3/MAPT/…	85
up	BP	GO:0097006	regulation of plasma lipoprotein particle levels	24/2140	95/18805	0.252632	2.21997	4.27173	0.000121576	0.00205863	0.00149555	MIR199A1/ABCA7/CD36/LPL/ANXA2/ACSL3/SCARB1/CETP/LIPA/MPO/EHD1/HMOX1/PCSK5/LIPC/LDLR/PCSK6/MSR1/FURIN/NCEH1/DGAT2/SOAT1/GPIHBP1/MIR223/MFSD2A	24
up	MF	GO:0140326	ATPase-coupled intramembrane lipid transporter activity	12/2171	27/18639	0.444444	3.81575	5.31605	1.94998e-05	0.00252912	0.00209982	ATP8B4/ABCA3/ABCA7/ABCA2/TMEM30B/ATP8B3/ATP10D/RFT1/ATP11A/ATP9A/ATP10B/MFSD2A	12
up	MF	GO:0140996	histone H3 kinase activity	68/2171	357/18639	0.190476	1.63532	4.40074	2.75912e-05	0.00275275	0.00228549	CSF1R/STK11/IRAK1/ROCK1/LATS2/ERN1/TYK2/SYK/CDC42BPB/AKT3/PTK2B/PRKCB/PDGFRB/PRKCD/WNK2/FGR/AXL/ULK1/MINK1/SIK3/CSNK1D/NEK6/RIPK4/SGK3/MATK/LIMK2/TNIK/MAPKAPK2/STK10/EPHA2/DAPK1/LMTK3/CIITA/SRC/FES/FLT1/SNRK/RIPK1/DAPK2/STK40/STK39/LYN/MAPKAPK3/PKMYT1/MAST3/ALPK1/NEK9/ABL2/KSR1/MAP2K1/NEK7/NEK3/INSR/RPS6KA3/MARK2/EPHB3/HCK/RAF1/EPHB1/TTBK2/INSRR/HIPK2/STK17A/TBK1/TNK2/PIM1/VRK2/STK24	68
up	BP	GO:0001701	in utero embryonic development	70/2140	403/18805	0.173697	1.52634	3.82754	0.000199918	0.0030595	0.00222267	PTPN18/ADAMTS3/CHD7/GATA6/PRDM1/SMAD2/SLC30A1/LATS2/ASCL2/SPECC1/SRF/KLF4/CEBPA/HS6ST1/ZMIZ1/ELL/LIF/DBN1/NOTCH1/ZFAND5/SH3PXD2A/MFN2/DNAJB6/FZD5/INPP5B/SNAI1/CHST11/IL10/PHLDA2/BIRC6/VEGFA/TMEM100/RBPJ/UPB1/GCM1/CEBPB/TMEM231/RTN4/GNA13/MAFF/TBL1XR1/ZFPM2/ACVR1B/FURIN/VASH1/ATP11A/TGFBR2/EDN1/TEAD4/AR/BMP2/TTLL4/ST14/HS3ST6/SMIM14/MAP2K1/MYO1E/SMG9/CTR9/MAFG/CTNNB1/ZFP36L1/PCDH12/EPAS1/HM13/WDTC…	70
up	MF	GO:0035173	histone kinase activity	68/2171	360/18639	0.188889	1.6217	4.32476	3.63287e-05	0.0031403	0.00260725	CSF1R/STK11/IRAK1/ROCK1/LATS2/ERN1/TYK2/SYK/CDC42BPB/AKT3/PTK2B/PRKCB/PDGFRB/PRKCD/WNK2/FGR/AXL/ULK1/MINK1/SIK3/CSNK1D/NEK6/RIPK4/SGK3/MATK/LIMK2/TNIK/MAPKAPK2/STK10/EPHA2/DAPK1/LMTK3/CIITA/SRC/FES/FLT1/SNRK/RIPK1/DAPK2/STK40/STK39/LYN/MAPKAPK3/PKMYT1/MAST3/ALPK1/NEK9/ABL2/KSR1/MAP2K1/NEK7/NEK3/INSR/RPS6KA3/MARK2/EPHB3/HCK/RAF1/EPHB1/TTBK2/INSRR/HIPK2/STK17A/TBK1/TNK2/PIM1/VRK2/STK24	68
up	MF	GO:0141003	histone H2AX kinase activity	67/2171	354/18639	0.189266	1.62493	4.31016	3.87392e-05	0.0031403	0.00260725	CSF1R/STK11/IRAK1/ROCK1/LATS2/ERN1/TYK2/SYK/CDC42BPB/AKT3/PTK2B/PDGFRB/PRKCD/WNK2/FGR/AXL/ULK1/MINK1/SIK3/CSNK1D/NEK6/RIPK4/SGK3/MATK/LIMK2/TNIK/MAPKAPK2/STK10/EPHA2/DAPK1/LMTK3/CIITA/SRC/FES/FLT1/SNRK/RIPK1/DAPK2/STK40/STK39/LYN/MAPKAPK3/PKMYT1/MAST3/ALPK1/NEK9/ABL2/KSR1/MAP2K1/NEK7/NEK3/INSR/RPS6KA3/MARK2/EPHB3/HCK/RAF1/EPHB1/TTBK2/INSRR/HIPK2/STK17A/TBK1/TNK2/PIM1/VRK2/STK24	67
up	MF	GO:0001540	amyloid-beta binding	23/2171	83/18639	0.277108	2.3791	4.57195	5.11463e-05	0.00390216	0.00323979	PRNP/TGFB2/LDLRAD3/CD36/SORL1/MARCO/PFDN1/FZD5/GSAP/SCARB1/ITGAM/ITM2B/FPR2/LILRB2/TLR4/LDLR/CST3/MSR1/ADRB2/INSR/TLR2/ITGB2/PICALM	23
up	MF	GO:0019207	kinase regulator activity	56/2171	287/18639	0.195122	1.67521	4.18549	6.92213e-05	0.00462035	0.00383608	CCDC88A/CCNJL/STK11/TGFA/TRIB1/CCND2/DUSP22/CDK5R1/PKIG/SH3BP5/PIK3R1/CCND3/SPRY2/HBEGF/DEPTOR/DNAJC3/SOCS1/ANGPT4/ERBB3/PIK3R5/VEGFA/ATG14/LAMTOR3/SRC/ACSL1/PRKAR2A/PRKAG2/GPRC5C/GSTP1/ATAD3A/PIK3R3/LYN/MOB1B/EPGN/PKIB/TGFBR2/EEF1A1/NEK9/CCNY/BMP2/IL2/LILRB4/EFNA5/PTPRC/MAP2K1/INSR/PIK3R6/TESC/MARK2/TGFB1/PRKAR2B/HEXIM2/NBN/TRIB3/PIM1/BCCIP	56
up	MF	GO:0002020	protease binding	32/2171	136/18639	0.235294	2.0201	4.33513	7.12875e-05	0.00462035	0.00383608	F2RL3/MBP/PARK7/PRNP/CDK5R1/SH3PXD2A/ANXA2/FLOT1/TNFAIP3/FAP/SYVN1/NFRKB/SERPINF2/F3/CSTA/LDLR/NLRC4/PSAP/CST3/SERPINB6/A2M/FURIN/BCL2/TNFRSF8/ATP9A/XBP1/PTEN/SRI/BIN1/TIMP2/SLC6A3/TIMP1	32
up	BP	GO:0170062	nutrient storage	23/2140	97/18805	0.237113	2.08361	3.83419	0.000450855	0.00573822	0.00416871	PLIN2/PPARG/CPT1A/IL1B/GM2A/CD36/OSBPL8/ABHD5/LPL/PISD/SCARB1/LIPA/EHD1/PPARD/RNF213/IKBKE/MSR1/FFAR2/SREBF2/DGAT2/SOAT1/CES1/CRY2	23
up	BP	GO:0140962	multicellular organismal-level chemical homeostasis	20/2140	80/18805	0.25	2.19685	3.84416	0.000502055	0.00628348	0.00456483	EXT1/ATP6V1B1/CTSH/ABCA3/HAS2/SLC11A1/SLC40A1/EXT2/LIPA/HMOX1/VEGFA/SFTPD/FBXL5/TRPV4/TGFB1/LPCAT1/CYBRD1/EPAS1/TFRC/PICALM	20
up	BP	GO:0048545	response to steroid hormone	59/2140	338/18805	0.174556	1.53389	3.5493	0.000535645	0.00660811	0.00480067	ZBTB7A/SMARCA4/IGFBP7/PADI2/DAB2/ABHD2/FOSL2/NCOR2/ABCA3/ADTRP/PARK7/TGFB2/INHBA/IL1RN/ZMIZ1/NR2C1/PTAFR/SSTR2/ABCA2/ZDHHC7/TRERF1/TBL1X/PPARD/IL10/PTGS2/ZFP36L2/CARD9/SRC/FOSB/PTGDS/HSPA1A/SCGB1A1/PTGER2/DNAJA1/SDC1/UCN3/FOXO3/TXNIP/STK39/A2M/BCL2/EDN1/ESR1/AR/DDIT4/JUN/MGARP/PTPRC/GNRH1/TLR2/PARP1/TGFB1/PAQR8/ZFP36L1/RXRA/CYP1B1/KANK2/NR1D1/CRY2	59
up	BP	GO:0007584	response to nutrient	34/2140	169/18805	0.201183	1.76788	3.59325	0.000653688	0.00774813	0.00562887	CASR/PPARG/SRF/CPT1A/MN1/PRKCB/LPL/ENSA/LIPA/PPARD/RARA/PTGS2/MLYCD/SLC34A1/ACSL1/FES/DNMT3A/ERCC1/IL1A/A2M/TMIGD1/GNAI2/F7/KYNU/MAT2A/HSF1/PHEX/XBP1/TGFB1/RXRA/CYP1B1/KANK2/TFRC/PIM1	34
up	BP	GO:0140895	cell surface toll-like receptor signaling pathway	18/2140	72/18805	0.25	2.19685	3.64611	0.000939444	0.0103066	0.00748756	TRIL/IRAK1/LILRA2/PIK3R1/TNFAIP3/PRKCE/NINJ1/IRAK2/TLR4/BPIFB1/TLR5/LYN/RAB11FIP2/MIR200B/MYD88/TLR2/NR1D1/TBK1	18
up	BP	GO:0035924	cellular response to vascular endothelial growth factor stimulus	26/2140	122/18805	0.213115	1.87272	3.46546	0.00112628	0.0118981	0.00864373	ADAMTS3/MIR199A1/CSF1R/PTP4A3/PIK3CB/ERN1/PDGFRB/NOTCH1/SPRY2/AXL/PGF/MIR21/MAPKAPK2/VEGFA/EPHA2/FLT1/GAS1/PIK3CD/CD63/INSR/XBP1/EPHB3/EGR3/EPHB1/INSRR/SPHK1	26
up	BP	GO:0035336	long-chain fatty-acyl-CoA metabolic process	9/2140	25/18805	0.36	3.16346	3.87882	0.00117018	0.0121333	0.00881461	FAR2/ACSL3/ACSF3/ACSL4/ACSL1/FAR1/ELOVL5/DGAT2/ELOVL1	9
up	MF	GO:0042578	phosphoric ester hydrolase activity	65/2171	363/18639	0.179063	1.53734	3.75379	0.000264797	0.0122658	0.0101837	PTPN18/PPM1H/PTP4A3/CASR/IMPA2/PLCB1/PTPN9/INPP5D/ACP6/EYA3/DUSP22/SSH1/PTPRE/PTP4A2/PTPMT1/PDE4D/DUSP1/HTT/CCR1/PDE8B/CTDP1/INPP5B/PDE4B/PDIA3/SMPDL3A/ENPP2/PTPRS/INPP5A/NT5M/SMPDL3B/SAMHD1/TNS1/PDE6A/FIG4/PLCXD1/G6PC3/PTPRM/PLCL1/DUSP6/PPM1F/PDE1C/PDE6H/CTDSP1/GDE1/PTPRC/GPCPD1/TNS3/PLCG2/PDP1/PPM1M/PLD2/PDE4A/INPP5F/FBP1/PTEN/PALD1/SSH3/MTMR11/CPPED1/PFKFB3/DUSP4/PPP2CA/INPP4A/RNGTT/PLD6	65
up	CC	GO:0017053	transcription repressor complex	19/2231	79/19880	0.240506	2.1431	3.61945	0.000962821	0.0123913	0.0105871	ZBTB16/NCOR2/SP1/HMGB1/MIER1/MXD1/JAZF1/TBL1X/RBPJ/MYC/SKI/AKIRIN2/TBL1XR1/FOXO3/CTNNBIP1/CTNNB1/BIN1/DEPDC1/CRY2	19
up	BP	GO:0003018	vascular process in circulatory system	49/2140	278/18805	0.176259	1.54886	3.30375	0.00122301	0.0125306	0.00910327	SLC6A6/P2RY2/DOCK5/EXT1/MMP2/ABCC1/PTP4A3/CASR/TBXAS1/ROCK1/ABCG2/ADRA1D/EDN2/SLC8A1/CD36/SLC1A2/ITGA9/ABCA2/ABCC3/SLC19A1/SLCO3A1/MKKS/EXT2/MIR21/PPARD/SERPINF2/VEGFA/PTGS2/PLEC/KCNMA1/SLC7A5/SRC/SLC7A8/FOXC2/ADORA2A/DOCK4/ADRB2/EDN1/ATP2A3/HRH2/CTNNBIP1/INSR/SLC1A3/TRPV4/TGFB1/ADORA2B/TFRC/MFSD2A/P2RY1	49
up	MF	GO:0030169	low-density lipoprotein particle binding	8/2171	17/18639	0.470588	4.04021	4.55328	0.000307337	0.0137454	0.0114122	COLEC12/CD36/SORL1/SCARB1/LIPC/LDLR/STAB1/MSR1	8
up	BP	GO:0019058	viral life cycle	51/2140	295/18805	0.172881	1.51917	3.2207	0.00152305	0.0148978	0.010823	CD28/CH25H/CLEC5A/CTSB/IFITM3/CD86/ICAM1/APOBEC3A/ITCH/ADAR/HMGB1/NOTCH1/AXL/N4BP1/NCAM1/APOBEC3G/SCARB1/ATG16L1/SELPLG/EPHA2/VAPA/PCSK5/SRC/IFITM2/LDLR/HSPA1A/OASL/MRC1/CXCR6/PDCD6IP/CTSL/FURIN/BCL2/EEF1A1/SIGLEC1/ANPEP/AICDA/F11R/NR5A2/VPS37C/INSR/ATG16L2/PABPC1/RAB7A/CXCR4/CCL2/HMGA2/TFRC/TNIP1/APOBEC3B/ITGA5	51
up	MF	GO:0042910	xenobiotic transmembrane transporter activity	11/2171	32/18639	0.34375	2.95125	4.01105	0.000651786	0.0155496	0.0129101	SLC31A1/ABCC1/ABCG2/ABCA3/ABCB11/ABCC3/SLC19A1/SLC37A3/SLC47A2/SLC18A1/ABCB5	11
up	MF	GO:0140823	histone H2BS36 kinase activity	46/2171	245/18639	0.187755	1.61196	3.50088	0.000707343	0.0155496	0.0129101	STK11/IRAK1/ROCK1/LATS2/ERN1/CDC42BPB/AKT3/WNK2/ULK1/MINK1/SIK3/CSNK1D/NEK6/RIPK4/SGK3/LIMK2/TNIK/MAPKAPK2/STK10/DAPK1/LMTK3/CIITA/SNRK/RIPK1/DAPK2/STK40/STK39/MAPKAPK3/PKMYT1/MAST3/ALPK1/NEK9/KSR1/NEK7/NEK3/RPS6KA3/MARK2/RAF1/TTBK2/HIPK2/STK17A/TBK1/TNK2/PIM1/VRK2/STK24	46
up	MF	GO:0140855	histone H3S57 kinase activity	46/2171	245/18639	0.187755	1.61196	3.50088	0.000707343	0.0155496	0.0129101	STK11/IRAK1/ROCK1/LATS2/ERN1/CDC42BPB/AKT3/WNK2/ULK1/MINK1/SIK3/CSNK1D/NEK6/RIPK4/SGK3/LIMK2/TNIK/MAPKAPK2/STK10/DAPK1/LMTK3/CIITA/SNRK/RIPK1/DAPK2/STK40/STK39/MAPKAPK3/PKMYT1/MAST3/ALPK1/NEK9/KSR1/NEK7/NEK3/RPS6KA3/MARK2/RAF1/TTBK2/HIPK2/STK17A/TBK1/TNK2/PIM1/VRK2/STK24	46
up	MF	GO:0140995	histone H2A kinase activity	46/2171	245/18639	0.187755	1.61196	3.50088	0.000707343	0.0155496	0.0129101	STK11/IRAK1/ROCK1/LATS2/ERN1/CDC42BPB/AKT3/WNK2/ULK1/MINK1/SIK3/CSNK1D/NEK6/RIPK4/SGK3/LIMK2/TNIK/MAPKAPK2/STK10/DAPK1/LMTK3/CIITA/SNRK/RIPK1/DAPK2/STK40/STK39/MAPKAPK3/PKMYT1/MAST3/ALPK1/NEK9/KSR1/NEK7/NEK3/RPS6KA3/MARK2/RAF1/TTBK2/HIPK2/STK17A/TBK1/TNK2/PIM1/VRK2/STK24	46
up	MF	GO:0140997	histone H4 kinase activity	46/2171	245/18639	0.187755	1.61196	3.50088	0.000707343	0.0155496	0.0129101	STK11/IRAK1/ROCK1/LATS2/ERN1/CDC42BPB/AKT3/WNK2/ULK1/MINK1/SIK3/CSNK1D/NEK6/RIPK4/SGK3/LIMK2/TNIK/MAPKAPK2/STK10/DAPK1/LMTK3/CIITA/SNRK/RIPK1/DAPK2/STK40/STK39/MAPKAPK3/PKMYT1/MAST3/ALPK1/NEK9/KSR1/NEK7/NEK3/RPS6KA3/MARK2/RAF1/TTBK2/HIPK2/STK17A/TBK1/TNK2/PIM1/VRK2/STK24	46
up	MF	GO:0140998	histone H2B kinase activity	46/2171	245/18639	0.187755	1.61196	3.50088	0.000707343	0.0155496	0.0129101	STK11/IRAK1/ROCK1/LATS2/ERN1/CDC42BPB/AKT3/WNK2/ULK1/MINK1/SIK3/CSNK1D/NEK6/RIPK4/SGK3/LIMK2/TNIK/MAPKAPK2/STK10/DAPK1/LMTK3/CIITA/SNRK/RIPK1/DAPK2/STK40/STK39/MAPKAPK3/PKMYT1/MAST3/ALPK1/NEK9/KSR1/NEK7/NEK3/RPS6KA3/MARK2/RAF1/TTBK2/HIPK2/STK17A/TBK1/TNK2/PIM1/VRK2/STK24	46
up	MF	GO:0140857	histone H3T45 kinase activity	46/2171	246/18639	0.186992	1.60541	3.47055	0.000773877	0.0163751	0.0135955	STK11/IRAK1/ROCK1/LATS2/ERN1/CDC42BPB/AKT3/WNK2/ULK1/MINK1/SIK3/CSNK1D/NEK6/RIPK4/SGK3/LIMK2/TNIK/MAPKAPK2/STK10/DAPK1/LMTK3/CIITA/SNRK/RIPK1/DAPK2/STK40/STK39/MAPKAPK3/PKMYT1/MAST3/ALPK1/NEK9/KSR1/NEK7/NEK3/RPS6KA3/MARK2/RAF1/TTBK2/HIPK2/STK17A/TBK1/TNK2/PIM1/VRK2/STK24	46
up	BP	GO:0062012	regulation of small molecule metabolic process	58/2140	347/18805	0.167147	1.46878	3.15846	0.00172289	0.0163755	0.0118965	ZBTB7A/P2RY6/CH25H/SLC4A1/STK11/DAB2/CD244/PPARG/PARK7/GDF15/CPT1A/IL1B/P2RX7/ABCB11/PTAFR/PMAIP1/PID1/MIR21/NUPR1/SNAI1/PPARD/LPGAT1/DKK3/PTGS2/SLC7A7/MLYCD/MID1IP1/PPP1R3G/SRC/PDK4/LDLR/FOXK1/PRKAG2/SREBF2/ELOVL5/WDR5/BMP2/DDIT4/IER3/IGFBP4/ADIPOR1/INSR/CDA/PARP1/ACADM/FBP1/TCF7L2/CES1/PPP2CA/NR1D1/WDTC1/PTH1R/TRIB3/SLC35B4/NTSR1/MFSD2A/P2RY1/ME2	58
up	BP	GO:0032956	regulation of actin cytoskeleton organization	58/2140	348/18805	0.166667	1.46456	3.13461	0.00184363	0.0169116	0.012286	PREX1/CDC42EP4/CSF1R/EPS8/CCDC88A/BAIAP2/ASAP3/RHOQ/ROCK1/BMP10/GSN/SIGLEC15/CDK5R1/SSH1/PIK3R1/PTK2B/ACTG1/PDGFRB/PRKCD/LPAR1/PRKCE/ARHGEF10L/VASP/MKKS/MIR21/CDC42EP2/CDC42EP3/C15orf62/SERPINF2/C9orf72/ARHGEF16/ARHGEF10/TRPM2/KANK1/NAA20/PPM1F/NEDD9/RHOC/IL1A/EDN1/RHOBTB2/EFNA5/CTTN/FMN1/ABL2/F11R/PXN/VILL/SLC9A1/FLII/TGFB1/IQGAP2/ARAP3/HCK/BIN1/SSH3/KANK2/WDR1	58
up	BP	GO:0016051	carbohydrate biosynthetic process	38/2140	207/18805	0.183575	1.61314	3.17865	0.0019632	0.0177127	0.012868	CHST15/P2RY6/SLC25A10/ST3GAL4/EXT1/CHSY1/STK11/FUT7/CD244/GYG1/HAS2/HAS1/PTAFR/EXT2/CHST11/PGM2/ST6GALNAC1/SLC25A13/PPP1R3G/G6PC3/PRKAG2/WDR5/PGD/INSR/PARP1/ACADM/TGFB1/FBP1/TCF7L2/ATF3/NR1D1/PTH1R/CHST13/NDST1/SLC35B4/B3GALNT1/NTSR1/P2RY1	38
up	MF	GO:0008514	organic anion transmembrane transporter activity	49/2171	269/18639	0.182156	1.56389	3.38241	0.000970213	0.0185054	0.0153642	SLC6A6/SLC25A10/SLC37A2/SLC4A1/SLC7A10/ASIC3/ABCC1/SLC16A3/SLC6A12/ABCG2/GRID1/SLC25A25/SLCO4A1/SLCO6A1/CD36/SLC1A2/ABCB11/SLC43A2/ABCC3/SLC19A1/SLC6A7/SLCO3A1/SLC15A4/SLC6A15/SLC16A5/SERINC5/SLC16A6/SLC46A2/SLC7A7/SLC25A47/SLC38A10/SLC7A5/SLC25A13/SLC38A8/SLC7A8/SLC4A7/AKR1C4/SLC36A1/SLC16A10/SLC25A19/SLC4A5/SLC27A5/BEST1/SLC17A9/SLC1A3/SLC25A29/SFXN5/SLC35B4/MFSD2A	49
up	BP	GO:0044843	cell cycle G1/S phase transition	47/2140	271/18805	0.173432	1.52401	3.11365	0.00212952	0.0188453	0.0136908	ARID1A/SMARCA4/SLFN11/CCNJL/RASSF1/LATS2/TFDP1/PLCB1/CACNB4/CCND2/KLF4/INHBA/MN1/CCND3/ADAM17/UBE2E2/TM4SF5/CUL1/PIAS1/GIGYF2/SUSD2/TERT/RPA2/MYC/KIF14/GPNMB/CUL5/RRM1/ACVR1B/MIR873/BCL2/CACUL1/CTDSP1/AIF1/BID/RBL1/LSM11/PBRM1/PLCG2/DGKZ/LSM10/PTEN/IQGAP3/CCL2/KANK2/PPP2CA/ID4	47
up	BP	GO:1990858	cellular response to lectin	8/2140	23/18805	0.347826	3.05648	3.53628	0.00281683	0.022464	0.0163197	SYK/CLEC7A/SRC/KLRK1/LYN/PLCG2/CREBBP/CLEC6A	8
up	BP	GO:0030644	intracellular chloride ion homeostasis	5/2140	10/18805	0.5	4.39369	3.84663	0.00292268	0.022564	0.0163923	TBXAS1/KCNE3/STK39/KCNQ1/FASLG	5
up	BP	GO:0046135	pyrimidine nucleoside catabolic process	5/2140	10/18805	0.5	4.39369	3.84663	0.00292268	0.022564	0.0163923	APOBEC3G/UPB1/AICDA/CDA/UPP1	5
up	BP	GO:0060947	cardiac vascular smooth muscle cell differentiation	5/2140	10/18805	0.5	4.39369	3.84663	0.00292268	0.022564	0.0163923	GATA6/MESP1/SRF/NOTCH1/VEGFA	5
up	CC	GO:0005938	cell cortex	54/2231	325/19880	0.166154	1.48056	3.10564	0.00206104	0.0252109	0.0215401	FLNB/SLC4A1/DBNL/EPS8/RIMS1/GSN/HIP1/MYZAP/PTK2B/ITCH/OSBPL8/PRKCB/GLRX3/ACTN4/RAI14/MYO7A/DBN1/CAPZB/PRKCZ/MYL9/FLOT1/CD302/MYO9B/BFSP1/DST/CDH2/CORO1C/VCL/CTSZ/MYO1A/SLC38A8/KANK1/PARD3B/ACTN1/NEDD9/STK39/EEF1A1/TMEM201/CYTIP/CTTN/MYO10/ITPR2/PXN/MYO1E/TRPV4/IQGAP2/MPP7/CTNNB1/IQGAP3/CLIP1/PARD6G/MLPH/CLIC5/WDR1	54
up	BP	GO:0140888	interferon-mediated signaling pathway	23/2140	112/18805	0.205357	1.80455	3.06022	0.00347448	0.025645	0.0186306	IRAK1/IFITM3/PPARG/TYK2/ADAR/IFNGR1/MIR21/GIGYF2/IFNGR2/RBM47/SAMHD1/IFITM2/IFNW1/OASL/IKBKE/IFNAR1/IFNL1/MYD88/HCK/EPG5/RAF1/YTHDF3/TBK1	23
up	MF	GO:0015179	L-amino acid transmembrane transporter activity	16/2171	62/18639	0.258065	2.2156	3.48103	0.00157459	0.0272299	0.0226078	SLC7A10/SLC1A2/SLC43A2/SLC6A7/SLC15A4/SERINC5/SLC7A7/SLC38A10/SLC7A5/SLC25A13/SLC38A8/SLC7A8/SLC36A1/SLC16A10/SLC1A3/SLC25A29	16
up	BP	GO:0031669	cellular response to nutrient levels	44/2140	258/18805	0.170543	1.49862	2.88985	0.00398303	0.0282931	0.0205544	MAP1LC3C/CASR/GAS2L1/PLIN2/SRF/WDR59/INHBA/MN1/SP1/LPL/SEH1L/PMAIP1/ULK1/RNF152/PPARD/ATG14/SLC7A5/DAP/SLC34A1/MAPKAP1/FES/PDK4/UCN2/PRKAG2/CLEC16A/MAP1LC3B2/UCN3/FOXO3/SREBF2/BCL2/KLF10/MAT2A/PHEX/SH3GLB1/XBP1/CPEB4/RXRA/CREBBP/ATF3/KANK2/UPP1/PIM1/MFSD2A/STK24	44
up	BP	GO:0032409	regulation of transporter activity	36/2140	202/18805	0.178218	1.56607	2.89856	0.00420856	0.0294453	0.0213915	PPIF/MIR129-1/CAMK2D/CACNB4/CNIH3/ACTN4/CCR2/PRKCD/WNK2/HTT/MINK1/KCNE3/MMP9/JPH3/FXYD2/DAPK1/GPR35/NEDD4L/SCN4B/RIPK1/AHNAK/STK39/MIR873/BCL2/EDN1/SYNGR3/ATP1B3/KCNQ1/SLC9A1/TESC/GSTO1/SRI/RXRA/CCL2/MIR192/PIM1	36
up	CC	GO:1990531	phospholipid-translocating ATPase complex	6/2231	14/19880	0.428571	3.81892	3.75127	0.00267833	0.0310959	0.0265683	ATP8B4/TMEM30B/ATP8B3/ATP10D/ATP11A/ATP10B	6
up	MF	GO:0036041	long-chain fatty acid binding	7/2171	17/18639	0.411765	3.53518	3.79691	0.00193849	0.0314278	0.0260931	PPARG/PPARD/ALOX5AP/STX3/S100A8/OXER1/S100A9	7
up	BP	GO:0045869	negative regulation of single stranded viral RNA replication via double stranded DNA intermediate	5/2140	11/18805	0.454545	3.99427	3.55964	0.00485893	0.0321359	0.0233461	APOBEC3A/APOBEC3G/AICDA/HMGA2/APOBEC3B	5
up	BP	GO:1903579	negative regulation of ATP metabolic process	8/2140	25/18805	0.32	2.81196	3.24863	0.00505097	0.0326209	0.0236984	SLC4A1/PID1/NUPR1/DDIT4/IER3/PARP1/FBP1/PPP2CA	8
up	BP	GO:0031648	protein destabilization	13/2140	53/18805	0.245283	2.1554	3.01838	0.00547759	0.0347129	0.0252183	CTSH/GSN/PRNP/HTT/CCDC88C/SRC/FBXW11/BMP2/XBP1/CAPN3/VPS35/CREBBP/NR1D1	13
up	BP	GO:0046902	regulation of mitochondrial membrane permeability	14/2140	59/18805	0.237288	2.08514	2.99149	0.00552831	0.0347749	0.0252633	PPIF/NAIF1/STPG1/PMAIP1/HK2/HSPA1A/BCL2/BID/THEM4/SLC35F6/IER3/SLC9A1/VDAC2/RHOT2	14
up	BP	GO:1900120	regulation of receptor binding	6/2140	16/18805	0.375	3.29527	3.29133	0.00628041	0.0383873	0.0278877	GREM2/ATP2A2/ANXA2/IL10/MMP9/ATP2A3	6
up	BP	GO:0010038	response to metal ion	55/2140	347/18805	0.158501	1.39281	2.6466	0.00691989	0.0410508	0.0298226	MYOG/PPIF/NDRG1/CASR/IMPA2/SLFN14/SLC30A1/CAMK2D/LGMN/P2RX4/PARK7/PRNP/SLC11A1/CEBPA/PTK2B/P2RX7/CLIC4/HMOX1/PTGS2/MEF2A/TERT/TCIRG1/ALOX5AP/KCNMA1/SLC25A13/SLC34A1/FOSB/ITPKA/DNMT3A/ERCC1/TRPM2/CPNE9/SDC1/TXNIP/STK39/IL1A/BCL2/HVCN1/EDN1/MEF2C/HAAO/S100A8/PLCG2/HSF1/MAPT/NEK7/PARP1/CAPN3/FBP1/CYBRD1/RASAL1/PPP2CA/TFRC/SUCNR1/SLC6A3	55
up	BP	GO:0050885	neuromuscular process controlling balance	13/2140	55/18805	0.236364	2.07702	2.86637	0.00762056	0.0437892	0.0318121	GPR88/CDH23/TIFAB/GM2A/MYO7A/TPP1/PDE8B/GIGYF2/JPH3/FOXS1/ANKFN1/SLC1A3/NBN	13
up	BP	GO:0141087	positive regulation of inflammasome-mediated signaling pathway	8/2140	27/18805	0.296296	2.60367	2.98814	0.00843472	0.0473865	0.0344254	LATS2/P2RX7/CD36/TLR4/PLCG2/NEK7/MYD88/PPP2CA	8
up	MF	GO:0004862	cAMP-dependent protein kinase inhibitor activity	5/2171	10/18639	0.5	4.29272	3.78155	0.00324351	0.0478049	0.0396903	PKIG/PRKAR2A/PRKAG2/PKIB/PRKAR2B	5
up	MF	GO:0001217	DNA-binding transcription repressor activity	48/2171	278/18639	0.172662	1.48238	2.9422	0.00335415	0.0478058	0.0396911	ZBTB7A/SATB1/PRDM1/ZBTB16/BHLHE40/ASCL2/NACC2/ELK3/PPARG/GTF2IRD1/CUX2/NR2C1/LRRFIP1/KLF16/MXD1/TCFL5/TBX21/BCL6/HIC1/SNAI1/PPARD/RARA/ZFHX3/SPI1/HHEX/IRF8/BACH2/MYC/CEBPB/FOXK1/SKI/ZBTB4/FOXS1/FOXO3/SREBF2/CREM/ATF7/JUN/HSF1/ZNF750/PLAGL1/ZNF668/SCRT2/SOX13/ATF3/NFIL3/NR1D1/MITF	48
up	BP	GO:0002679	respiratory burst involved in defense response	6/2140	17/18805	0.352941	3.10143	3.10619	0.00878443	0.0486281	0.0353274	LIPA/MPO/SLAMF8/PIK3CD/HCK/S100A9	6
down	BP	GO:0030098	lymphocyte differentiation	160/3850	432/18805	0.37037	1.80904	8.63149	7.37906e-16	4.58756e-12	4.03829e-12	CD79A/CHD7/CR2/CAMK4/MYB/ITM2A/CD28/CD3D/IL7R/FOXP1/RASGRP1/ATF2/NDFIP1/CD2/TGFBR2/CMTM7/CCR9/LIPA/IRF4/CCR7/SASH3/SLAMF1/SMARCA2/IL10/SOS1/LY9/BRAF/BAK1/CD40LG/TNFSF8/PTK2B/DOCK10/LMBR1L/SMAD7/LEF1/SEMA4A/FLT3LG/RUNX1/BCL11B/DOCK11/SMARCE1/ARID1B/ATP7A/CD3G/ZAP70/IRF1/IFNG/CD3E/LIG4/DNAJB9/YY1/B2M/ITGA4/CDK6/IL2RA/EGR3/TESPA1/NFAM1/ARID1A/XBP1/IL23A/PPP2R3C/RUNX2/CRTAM/SHH/FOXO3/THEMIS/CYLD/CD27…	160
down	MF	GO:0003712	transcription coregulator activity	176/3943	495/18639	0.355556	1.68075	7.95129	5.5377e-14	7.44821e-11	6.33629e-11	PRDM8/SETD4/DYRK1B/MED15/LPIN2/NUP98/CITED4/XPC/CCDC124/SAP30/PER2/UXT/APBB1/BTG2/MAML2/IRF4/SMARCA2/ZNF451/NRIP1/ATF7IP/CD274/PARP10/ING4/DNAJB1/SMAD7/PBXIP1/HIRA/SMARCE1/ARID3A/ARID1B/COPS5/TOX2/ARID5B/NPAT/LPXN/TLE4/SFMBT2/HDAC7/MED22/DNMT3A/N4BP2L2/TRIM14/TBL1X/BCL11A/MED30/AKIRIN2/MED11/MED19/MED1/ACTN4/AIP/ENY2/ARID1A/USP16/DYRK1A/PSMD9/COPS2/TRIM38/KAT6B/BIRC2/LDB1/TLE6/FUS/KDM7A/RNF20/NUC…	176
down	BP	GO:0008380	RNA splicing	168/3850	482/18805	0.348548	1.70245	7.92691	7.76592e-14	2.41404e-10	2.125e-10	PRMT7/HNRNPH2/DDX42/NUP98/SCAF1/PPP4R2/DHX40/CLP1/BCAS2/HNRNPC/PNN/WBP11/FASTK/AKAP8L/PTBP1/YBX1/C2orf49/SRPK2/SF3B5/RNVU1-4/RBM38/PRPF38B/RBM41/CWC25/TRA2A/CDC40/CDK13/RTCB/LSM1/SDE2/CWC22/RBM23/ENY2/RBM25/TIA1/DYRK1A/PPIH/ISY1/MBNL3/FUS/CELF6/SNRNP200/YTHDC1/SMU1/RBM6/HNRNPA1L2/RNVU1-3/ZCCHC8/HABP4/KHDRBS1/PSIP1/RBMXL1/NSRP1/METTL16/ZBTB8OS/AKAP17A/ZC3H13/SFPQ/SNRPB/SUPT3H/PRPF8/RBM22/ZC3H10/RB…	168
down	BP	GO:0072594	establishment of protein localization to organelle	161/3850	467/18805	0.344754	1.68392	7.59365	7.26931e-13	1.12983e-09	9.94557e-10	GOLPH3/HK2/HSPA4/NUP98/PPP3R1/ATF2/TMEM126A/GDAP1/SORL1/GCC2/SRP72/HACL1/PEX16/LAMP1/ING1/MON1B/USP36/PEX1/PPP1R10/LEPROT/DNAJC15/LAMP3/VPS13C/STK4/M6PR/SRP54/SGTB/NUP54/LAMP2/SAE1/PRKAA1/RAN/RALA/TIMM44/TOMM20/SMAD3/RAB11A/FIS1/HERPUD1/IFNG/VPS41/TPR/SSR3/RAB7A/GNPTAB/POM121/KPNA5/AKIRIN2/MED1/TIMM8A/KPNA4/AIP/CCT7/IPO11/TOMM20L/ATG14/XBP1/SRP19/EDEM1/PEX6/LONP2/NUP107/SHH/PIN1/SAMM50/CBLB/KPNA3…	161
down	BP	GO:0006403	RNA localization	86/3850	206/18805	0.417476	2.03912	7.60885	2.58802e-12	3.21794e-09	2.83266e-09	XPO1/FXR1/NUP98/TGFBR2/NOP58/AKAP8L/SENP2/YBX1/MVP/DDX19A/ZC3H3/AHCTF1/NUP54/RAN/TOMM20/PABPN1/TPR/NUP210/SSB/YY1/CETN3/POM121/G3BP2/NEAT1/ATR/NUP160/AAAS/CCT7/ENY2/TOMM20L/IGF2BP3/NUP107/DHX36/NUP43/YTHDC1/EIF4E/HNRNPA1L2/NAF1/NDC1/KHDRBS1/NUP155/CCT4/RFTN1/RUVBL1/CCT3/CCT2/ZC3H11A/HNRNPA1/QKI/TERF1/SIDT2/PRPF6/FYTTD1/NCBP2/CCT8/ZFP36L1/KPNB1/DCP2/NUP50/SETD2/KIF5C/EIF4A3/THOC1/SRSF1/NUP153/TCP1…	86
down	CC	GO:0016607	nuclear speck	142/3993	415/19880	0.342169	1.70356	7.26146	7.48356e-12	5.62764e-09	4.01749e-09	API5/ELL3/DDX42/UNC45A/MBD4/BMP2K/APBB1/BCAS2/PNN/HBP1/MAML2/USP36/AKAP8L/NRIP1/LHPP/SRP54/SRPK2/PRKAA1/EAF2/PABPN1/LPXN/PIP5K1A/CWC25/SFMBT2/CDC40/VPS72/CDK13/AP5Z1/CMYA5/SDE2/CWC22/DGKZ/RBM25/DYRK1A/SGK1/DAZAP2/PPIH/ATOH8/PIN1/DHX36/NUP43/YTHDC1/RMI2/SMU1/FAM76B/EIF4E/BASP1/PNISR/HABP4/NSRP1/AKAP17A/TUT1/ITPKC/ZC3H13/SFPQ/PRPF8/KIF22/RREB1/PLRG1/SLU7/PATL1/THRAP3/TENM1/UBASH3A/TRIM69/SRRM2/ACIN…	142
down	MF	GO:0042393	histone binding	96/3943	247/18639	0.388664	1.83726	6.8613	1.36969e-10	6.14078e-08	5.22405e-08	CHD7/USP3/PRMT7/UHRF2/MTF2/TSPYL1/CHD8/APBB1/KDM8/ING1/SMARCA2/SET/NAP1L1/SPIN1/ING4/CHD6/HIRA/MSL3/SPIN2B/SFMBT2/VPS72/TSPYL4/TBL1X/HINFP/USP16/MORC4/ANP32E/CKS2/SPTY2D1/ANP32A/KDM7A/RNF20/SSRP1/SCML4/RBBP7/MLLT3/NPM3/PRKCB/PWP1/STAT1/ATAD2B/MYSM1/UIMC1/CBX1/PHF6/PHF8/TSPYL2/NPM1/ING3/TRIM24/MLLT10/BRD1/CXXC1/JMJD7/NAP1L4/SMARCA5/SMARCA4/TBL1XR1/ZMYND11/SAMD7/MPHOSPH8/CHD4/WDR5B/ZZEF1/FAM156B/CB…	96
down	BP	GO:0033044	regulation of chromosome organization	91/3850	244/18805	0.372951	1.82165	6.55453	8.4927e-10	6.53354e-07	5.75127e-07	BUB3/RAD50/NCAPH/NSMCE2/HNRNPC/MAD1L1/SMARCA2/PPP1R10/ZWILCH/GNL3L/PRKCQ/PIF1/NUMA1/SMARCE1/ARID1B/TINF2/SKA3/LIG4/TPR/TERF2IP/YY1/FBXO4/ATR/CDC6/NVL/CCT7/ARID1A/TRAPPC12/DHX36/CDK2/RMI2/ACTL6A/NAF1/SMC2/CCT4/MAD2L1/RUVBL1/XRCC1/USP7/RNF4/ACTR8/TTK/CHFR/NAT10/DUSP1/CCT3/APC/MYC/CCT2/SMARCA5/SMARCA4/AXIN2/PARP1/HNRNPA1/CENPF/TERF2/TERF1/CDC16/SPC24/HNRNPD/CCT8/FEN1/DCP2/MCPH1/ANAPC7/ANAPC4/NFRKB/K…	91
down	BP	GO:0022613	ribonucleoprotein complex biogenesis	157/3850	494/18805	0.317814	1.55233	6.31207	1.4439e-09	8.16063e-07	7.18355e-07	CHD7/XPO1/PRMT7/NOB1/TFB2M/SUV39H1/DDX42/CLP1/WBP11/DIS3/USP36/MDN1/NOP58/NSUN5/WDR43/GNL3L/MRTO4/RPS19BP1/RPS28/SRPK2/SF3B5/RNVU1-4/RAN/DDX27/UTP6/TBL3/RPL35A/ISG20/RCL1/NOLC1/AGO2/RPL7L1/DIMT1/SDE2/ATR/POP4/RIOK1/NVL/USP16/RPUSD2/GAR1/MAK16/ISY1/RPS19/WDR75/CELF6/NOL10/SNRNP200/YTHDC1/UTP18/RPS15A/NAF1/RNVU1-3/NPM3/PSIP1/METTL16/LAS1L/NLE1/SNRPB/PWP1/PRPF8/RPL27/NGDN/ERAL1/SLU7/DDX10/TRMT2B/RUV…	157
down	MF	GO:0140297	DNA-binding transcription factor binding	158/3943	488/18639	0.32377	1.5305	6.15117	3.29636e-09	1.1084e-06	9.42934e-07	UHRF2/FOS/RBX1/MAX/FOXP1/ATF2/TMF1/XPC/PURA/NRIP1/PER1/PSMA6/PARP10/GSK3B/LEF1/PCNA/PBXIP1/TTC8/STK4/RUNX1/ANXA4/HIRA/SMARCE1/CCNT1/ELK1/SMAD3/TLE4/STRN/HDAC7/YY1/DNMT3A/BCL11A/MED30/TBP/MED1/ACTN4/AIP/ARID1A/PSMD9/XBP1/MAP3K7/CPNE1/DAZAP2/ATOH8/RUNX2/LDB1/SMAD2/KDM4C/NUCKS1/BCOR/EIF4E/TDG/JUN/ADD1/PSIP1/PRKCB/BCL2/ASXL1/CCDC62/THRAP3/FHL2/SKI/MTA2/TLE1/CNOT1/NPM1/CRTC3/MYC/PHB2/TRIM24/SNW1/HMGB2…	158
down	BP	GO:0140014	mitotic nuclear division	98/3850	282/18805	0.347518	1.69742	5.98723	1.41991e-08	5.85394e-06	5.15304e-06	KIF14/BUB3/CHMP7/CD28/CDC42/MAP9/SPAST/NCAPH/NSMCE2/DRG1/MAD1L1/AKAP8L/CDC14A/SKA2/STAG2/SPICE1/ZWILCH/NUMA1/RAN/MYBL2/RAB11A/SKA3/TPR/VPS4B/NDE1/TUBG1/AAAS/KIF2A/KIF20B/PPP2R1A/USP16/PIN1/SMC2/MKI67/KIF18A/MAD2L1/UBXN2B/KIF22/AURKAIP1/CLASP2/TTK/CHMP3/DUSP1/APC/PHB2/CDC14B/MTBP/SMARCA5/MZT1/CHMP4A/CHEK2/CENPF/CDC16/SPC24/LSM14A/MAPRE1/SMC3/CEP97/CUL9/RRS1/CDCA2/KPNB1/CENPC/KATNB1/EDN1/POLDIP2/PP…	98
down	BP	GO:0050851	antigen receptor-mediated signaling pathway	79/3850	213/18805	0.370892	1.81159	6.04402	1.43103e-08	5.85394e-06	5.15304e-06	CD2AP/CD79A/CD28/CD3D/FOXP1/LIPA/CCR7/SOS1/BRAF/PDE4D/PRKCH/TXK/CD3G/ZAP70/LPXN/CD3E/LAT/PIK3CA/SLC39A10/TESPA1/TRAT1/DGKZ/BTRC/NFAM1/GCSAM/MAP3K7/STAP1/THEMIS/CYLD/IKBKB/CBLB/UBE2N/EIF2B2/KHDRBS1/MS4A1/BLNK/RFTN1/PRKCB/CD8A/BCL2/PRAM1/PLCL2/UBASH3A/KCNN4/MOG/NFATC2/SLC39A6/ITK/LCP2/FYN/PTPRC/CTLA4/CD38/ABL1/CD226/STOML2/PDE4B/UBR2/LYN/CRKL/NCKAP1L/LCK/LAPTM5/KLHL6/BTN3A2/BANK1/CD22/EIF2B1/NFKBIZ…	79
down	BP	GO:0016236	macroautophagy	121/3850	374/18805	0.323529	1.58025	5.75096	3.59787e-08	9.7252e-06	8.56079e-06	SESN3/HK2/CHMP7/RAB43/CDC37/PGAM5/PIP4K2A/C9orf72/LZTS1/USP36/RAB33B/GNAI3/SUPT5H/RHEB/CALM1/ATG2A/RAB5A/VPS13C/TECPR1/LAMP2/SCFD1/STX17/VPS41/STX12/ATP6V1H/VPS4B/LRBA/PIK3CA/AP5Z1/RAB7A/HMOX1/TP53INP2/ZFYVE26/RNF5/TMEM41B/VPS39/ATG14/MAP3K7/VPS37B/PIK3C3/RAB1A/PAFAH1B2/ATG3/UBXN2B/TEX264/ULK2/TBC1D25/CHMP3/KDR/ATG12/RAB33A/PHB2/ATP6V1C1/UBQLN2/HUWE1/CHMP4A/UVRAG/CHEK2/YOD1/TMEM39A/RB1CC1/PDCD6IP…	121
down	BP	GO:0007059	chromosome segregation	135/3850	431/18805	0.313225	1.52992	5.6469	5.38214e-08	1.30568e-05	1.14935e-05	KIF14/BUB3/CHMP7/CDC42/MAP9/NCAPH/NSMCE2/BCAS2/DRG1/MAD1L1/MAPRE2/SMARCA2/PUM1/AKAP8L/SKA2/STAG2/SPICE1/CENPM/ZWILCH/SMARCAD1/NUMA1/SMARCE1/MND1/ESCO2/SETDB2/ARID1B/RAN/MYBL2/RAB11A/SKA3/TPR/VPS4B/CENPH/NDE1/HAUS5/TUBG1/RAD18/CDC6/AAAS/KIF2A/PPP2R1A/ARID1A/TEX11/MAU2/RNF212/TRAPPC12/NUP43/DYNC1H1/RMI2/DDB1/ACTL6A/NDC1/SMC2/MKI67/KIF18A/MAD2L1/BRIP1/CCNE1/KIF22/CLASP2/RNF4/CENPU/TTK/CHFR/CHMP3/DUS…	135
down	BP	GO:0002181	cytoplasmic translation	65/3850	169/18805	0.384615	1.87862	5.82145	5.46047e-08	1.30568e-05	1.14935e-05	GTPBP1/DRG1/YBX1/RPL39/RPL37/RPS28/CNBP/RPL35A/RPL18/UBA52/DHX36/RPS19/RPS15A/ETF1/RPL31/EIF2B2/RPL36/YBX3/RPL27/RPL18A/RPL30/AKT2/CPEB4/RPL14/RPS29/EIF4A1/RPL13/EIF3H/RPS6/RBM4/FTSJ1/RPS11/HNRNPD/RPL21/SH3BGRL/EIF3D/UNK/NCBP2/RPL23A/RPSA/EIF2S2/SMYD5/RPLP1/CSDE1/RPS7/RPL6/RPS27A/SYNCRIP/RPS20/EIF4B/EIF2B1/RPS3A/RPL28/RPL5/RPL24/RPL29/FAU/RPS16/RPL23/RPL8/EIF2B5/RPL10A/RPS24/RPLP2/RPL27A	65
down	BP	GO:0048872	homeostasis of number of cells	111/3850	339/18805	0.327434	1.59932	5.64984	6.46525e-08	1.43552e-05	1.26364e-05	DNASE2/MYB/WDR48/IL7R/KLF2/GCNT4/LIPA/TSC22D3/CCR7/SASH3/GPR174/SOS1/BAK1/KLF13/DOCK10/NOS3/DOCK11/JAM3/ARID4A/LAT/CHST3/B2M/CDK6/IL2RA/HMOX1/HSPA9/OCIAD2/MED1/TMOD3/PPP2R1A/PPP2R3C/LDB1/SFXN1/FOXO3/RPS19/CYLD/GPI/BPGM/SLC25A38/NLE1/STAT1/CSF1/BCL2/ASXL1/KRAS/MIR17HG/OCIAD1/ACIN1/ITPKB/PRDX1/CORO1A/BRD1/HMGB2/VPS54/IKZF1/GPR183/CITED2/RPS6/ETS1/SH2B3/CCNB2/TUBA1A/GPAM/CD74/MAEA/GATA2/SIVA1/ABL1/Z…	111
down	MF	GO:0003735	structural constituent of ribosome	68/3943	175/18639	0.388571	1.83682	5.76105	6.48196e-08	1.74365e-05	1.48334e-05	MRPL42/MRPS14/MRPL24/MRPS18C/LINC01004/MRPS6/RPL39/MRPS17/RPL37/RPS28/RPL35A/RPL7L1/MRPS5/MRPL35/RPL18/UBA52/MRPS31/RPS19/RPS15A/RPL31/RPL36/RPL27/RPL18A/RPL30/MRPL22/MRPS33/RPL14/RPS29/RPL13/RPS6/RPS11/MRPL52/MRPS35/MRPL36/RPL21/MRPS22/MRPS25/MRPL54/RPL23A/RSL24D1/RPL39L/RPSA/RPLP1/MRPL11/RPS7/MRPL43/RPL6/MRPL20/RPS27A/RPS20/MRPL16/MRPL19/MRPS18B/MRPL55/RPS3A/RPL28/RPL5/RPL24/RPL29/FAU/RPS16/RPL…	68
down	BP	GO:0048193	Golgi vesicle transport	101/3850	306/18805	0.330065	1.61218	5.47804	1.61475e-07	2.57408e-05	2.26588e-05	GOLPH3/YIPF5/TMEM115/SPAST/SORL1/GCC2/SEC23B/SEC31A/TRAPPC13/ARF4/LAMP1/RAB33B/INSIG1/MYO5A/VPS13C/PREPL/GOLGA5/COPE/MIA3/SCFD1/CUX1/TRAPPC2/RAB11A/STXBP5/STX17/VPS41/ANK1/SNX2/RAB4B/AP5Z1/TMED10/TRAPPC9/SNX3/TRAPPC12/AMN/LMAN2/RAB1A/NAPA/ERGIC2/GOLT1B/TBC1D20/SEC22C/KLHL20/TMED4/COG6/RNF139/PKDCC/P4HB/SEC23A/VPS54/TRAPPC4/UVRAG/BBS2/GOSR2/CCDC91/SAR1A/NBAS/SCAMP2/COMMD1/ANK3/SEC22A/USO1/WHAMM/GO…	101
down	BP	GO:0009895	negative regulation of catabolic process	116/3850	368/18805	0.315217	1.53965	5.30463	3.17777e-07	4.59447e-05	4.04437e-05	USP38/DFFB/FXR1/USP25/SORL1/ZCCHC17/HNRNPC/MDM4/MAP1A/LZTS1/USP36/IL10/RRAGA/N4BP1/BOLL/LAMP3/VPS13C/YBX1/ANGEL2/MYCBP2/SCFD1/RBM38/PRKAA1/MTMR2/RRAGB/SMAD3/STYX/BSCL2/PDE3B/PIK3CA/CNR1/HMGCR/HMOX1/PSMF1/RNF5/ZKSCAN3/SNX3/IGF2BP3/AZIN1/SHH/PIN1/DHX36/FUS/FAM76B/NAF1/MTMR9/PDCL3/METTL16/YBX3/PIK3CG/MAD2L1/BCL2/BAG5/SVIP/THRAP3/USP7/DAP/WNT1/RGP1/CRTC3/PRKCG/EIF3H/UBXN1/HFE/TAF15/HERC1/AXIN2/HSP90A…	116
down	CC	GO:1902493	acetyltransferase complex	43/3993	106/19880	0.40566	2.01967	5.27703	1.06514e-06	5.94976e-05	4.24745e-05	NAA35/ATF2/ING4/MSL3/SF3B5/VPS72/KANSL2/EPC2/ENY2/MAP3K7/KAT6B/ACTL6A/KAT7/SUPT3H/TAF2/RUVBL1/NAA25/MBIP/JADE2/MSL2/ING3/BRD1/TRRAP/DR1/JADE1/SUPT20H/DLD/NAA20/TAF9/PHF20L1/MSL1/NAA15/NAA50/KAT2B/TADA1/OGT/SF3B3/BRPF3/POLE3/EP300/NAA16/MRGBP/KAT6A	43
down	BP	GO:0031647	regulation of protein stability	119/3850	386/18805	0.30829	1.50582	5.09468	8.10738e-07	8.82639e-05	7.7696e-05	USP38/USP25/RTN4/CDC37/DAD1/UXT/TREX1/MDM4/KDM8/LAMP1/USP36/SENP2/IP6K2/SMAD7/GNL3L/STK4/APTX/USP28/LAMP2/MIR101-1/AAK1/SMAD3/PFDN2/STX12/PPIB/USP1/CMTM6/TMC8/TBL1X/FBXO4/RNF5/DPM2/CCT7/BTRC/XBP1/DAZAP2/INSC/PEX6/CDKN2AIP/EPHA4/PIN1/HIP1/NR1D1/MTMR9/CCT4/PDCL3/USP12/CDC37L1/HIP1R/BCL2/BAG5/GBA3/RAB21/RUVBL1/USP7/AKT2/RNF139/CHFR/APOA1/CCT3/CCT2/PHB2/TRIM24/CCNH/DERL1/CHEK2/HSP90AB1/PIK3R1/CD74/US…	119
down	BP	GO:0019827	stem cell population maintenance	66/3850	187/18805	0.352941	1.72391	5.0478	1.66951e-06	0.000148276	0.000130523	PAF1/MTF2/MED15/SAP30/ING1/SMARCA2/BRMS1L/BRAF/NOG/PCM1/WDR43/CNOT3/SMARCE1/ZHX2/ARID4A/LIG4/VPS72/NANOS2/LSM1/MED30/ARID1A/LDB1/FOXO3/KDM4C/LBH/EIF4E/ACTL6A/RBBP7/ZC3H13/WNT7A/FOXO1/SKI/MED7/CNOT1/MYC/SAP130/SMARCA4/BRMS1/SMC3/GATA2/HES1/NCOA3/BCL9L/REST/PELO/MCPH1/CDC73/KIT/MED17/SMC1A/MED14/DDX6/LEO1/MED6/LINC-ROR/EIF4ENIF1/OGT/LOXL2/MED28/TRIM8/PHF10/ASPM/SIRT6/SAV1/ZFP36L2/SMO	66
down	MF	GO:0003697	single-stranded DNA binding	48/3943	121/18639	0.396694	1.87522	5.00294	2.68408e-06	0.000451261	0.000383894	FUBP1/RAD50/WDR48/XPC/MCM3/ZRANB3/TREX1/WBP11/PURA/PCBP3/SSBP2/MCM10/YBX1/APTX/TSNAX/TERF2IP/NABP1/RAD18/RPA1/RAD51B/DHX36/NUCKS1/SSBP3/TDP1/SMC2/RPA3/RPA2/HMGB2/HMCES/HNRNPA1/TERF2/RBMS1/TERF1/SPRTN/POLR2G/SAMHD1/MCM2/NEIL3/ERCC5/HMGB1/TOP1/SWSAP1/HNRNPA2B1/PURB/LRPPRC/RAD23A/SMC4/CTC1	48
down	MF	GO:0106310	protein serine kinase activity	113/3943	361/18639	0.313019	1.47968	4.76708	3.45785e-06	0.000516757	0.000439613	TNIK/CDKL3/CAMK4/DYRK1B/STK17B/ULK4/NUAK2/BMP2K/MAPK13/DYRK2/SNRK/FASTK/BRAF/MAP4K4/MAP3K14/GSK3B/STK10/MOK/PRKCH/PRKCQ/STK4/CSNK2A3/MARK3/SRPK2/PRKCA/PRKAA1/TSSK6/PDIK1L/AAK1/CAMK1D/CDKL2/CDK13/PIK3CA/PRKCE/CDK6/RPS6KA3/CDKL5/ATR/RPS6KA5/RIOK1/IRAK4/STK24/DYRK1A/CSNK1G3/ARAF/MAP3K7/SGK1/MAP4K3/CDK2/IKBKB/STK16/PRKX/PRKACB/PRKCB/PIK3CG/TNK2/CDK4/CDK15/MAP2K5/TRPM7/ULK2/AKT2/TTBK1/MAPK6/TTK/MAP3K3…	113
down	BP	GO:0140694	membraneless organelle assembly	125/3850	427/18805	0.29274	1.42986	4.55888	7.91981e-06	0.000543687	0.000478591	CEP152/CHMP7/MAP9/FXR1/AKAP13/C9orf72/BCAS2/DRG1/MAPRE2/MDN1/SKA2/STAG2/SPICE1/MRTO4/RPS28/NUMA1/MOSPD2/PRKAA1/MYBL2/RAB11A/SKA3/BSCL2/TPR/VPS4B/CENPH/HAUS5/AGO2/KIF9/G3BP2/PRKAR1A/AAAS/TMOD3/KIF2A/PRRC2C/LCP1/PPP2R1A/MYBPC1/TIA1/DAZAP2/CNOT6L/TRAPPC12/GRB7/FUS/RPS19/CDK2/DYNC1H1/DDB1/PISD/CCP110/MSN/MYOZ1/ASB2/ERAL1/PATL1/CLASP2/RNF4/CENPA/CNOT1/NPM1/CHMP3/PLK4/MZT1/CHMP4A/TUBGCP5/CHEK2/PWP2/CEN…	125
down	BP	GO:0034976	response to endoplasmic reticulum stress	89/3850	283/18805	0.314488	1.53609	4.6105	7.9581e-06	0.000543687	0.000478591	TMEM67/CREBRF/USP25/TMTC3/EDEM3/UBAC2/NRBF2/PARP8/BAK1/GSK3B/GORASP2/RASGRF2/DERL2/COPS5/NCK2/HERPUD1/DNAJB9/PTPN1/SERINC3/TTC23L/STT3B/RNF5/BFAR/MAN1C1/XBP1/TXNDC12/EDEM1/MAN1B1/FAM8A1/BHLHA15/JUN/PSMC6/PPP1R15B/BCL2/RNF121/SVIP/AKT2/PIK3R2/RNF139/P4HB/CANX/RNF7/UBXN1/DERL1/UBQLN2/FAF1/YOD1/PIK3R1/ERP29/ANKZF1/ABCA7/RNFT2/ITPR1/ERP44/ABL1/VCP/ERMP1/ERN1/TMEM117/UBE4A/TMUB1/FAF2/SERP1/UFC1/DNAJC1…	89
down	MF	GO:0019207	kinase regulator activity	93/3943	287/18639	0.324042	1.53178	4.70269	5.18014e-06	0.000569613	0.000484578	RAD50/CCNK/CDC37/TGFBR2/AREG/CCNY/PIK3IP1/PARP8/RHEB/CALM1/CD40LG/HTR2A/MOB3A/PRKCH/STK4/CCNT1/DBF4/PIK3CA/PIK3R5/PRKAR1A/CCND2/CCNG2/ELP3/ATG14/DAZAP2/PRKAG1/CKS2/STAP1/TCL1A/PPP2R5A/IRS2/RHOH/CDK4/CCNE1/PKIA/SH3BP5/CDKN2C/MBIP/PRKAR2A/PIK3R2/NPM1/ETAA1/APC/CCNG1/CCNH/FAF1/HSP90AB1/CCNB2/CNPPD1/PIK3R1/CCNC/PTPRC/SOCS1/RICTOR/CALM2/GRM5/PIK3R3/ITPRIP/PKIG/TRIB2/LYN/CASP3/RPLP1/NCKAP1L/CCNA2/LAMTO…	93
down	MF	GO:0044389	ubiquitin-like protein ligase binding	102/3943	322/18639	0.31677	1.49741	4.66366	5.7195e-06	0.000569613	0.000484578	CASP8/RBX1/USP25/UBE2W/RTN4/CXCR4/APBB1/TGFBR1/SH3KBP1/PER1/RRAGA/GSK3B/PTK2B/SMAD7/SNX9/SHPRH/UBB/ZNF675/CACYBP/RALA/SMAD3/CASP10/RAD18/UBA52/HSPA9/PRKAR1A/XBP1/MAP3K7/DAZAP2/TRAF3/SUMO1P1/SMAD2/RNF20/UBASH3B/GPI/UBE2N/JUN/PRKACB/CD40/TRIM28/RANGAP1/FOXO1/STAT1/RFFL/TNK2/BCL2/BAG5/GLMN/PRKAR2A/SKI/JAK1/CACUL1/ARIH1/RPA2/APC/CCT2/UBXN1/CCDC50/PIAS1/DERL1/AXIN2/FAF1/PARP1/CHEK2/HSP90AB1/YOD1/HSPBP…	102
down	MF	GO:0043021	ribonucleoprotein complex binding	63/3943	177/18639	0.355932	1.68253	4.72589	6.35256e-06	0.000569613	0.000484578	PRMT7/FXR1/SRP72/MTIF3/LEMD3/SRP54/DERL2/NEAT1/RBM23/NVL/USP16/SECISBP2L/PPIH/SRP19/ETF1/LTN1/HABP4/YBX3/SNRPB/ERAL1/GUF1/PHF6/SNRPG/EIF1/DAP/CPEB4/NPM1/EEFSEC/DERL1/MRPS27/LETM2/PRPF6/UNK/RICTOR/GTPBP4/NOMO1/SERBP1/PQBP1/RPSA/MALSU1/DDX5/SRP9/CBX5/SNRPD1/RBM39/EIF4A3/NAA15/PELO/RPLP1/CSDE1/EIF4B/CPSF6/ERI1/ZNF622/CKAP5/EIF5A/TTC5/NAA16/TMA16/SBDS/SNRPA/LETMD1/SND1	63
down	CC	GO:0005925	focal adhesion	119/3993	424/19880	0.28066	1.39733	4.14601	4.23447e-05	0.000909807	0.000649498	EVL/ACTN1/GIT2/FLT1/CDC42/DPP4/MAPRE2/SH3KBP1/CD44/APBB1IP/MAP4K4/SORBS3/PTK2B/NEDD9/RRAS2/RALA/CPNE3/LPXN/PIP5K1A/MYH9/PPIB/YWHAQ/B2M/ITGA4/MDC1/RPL18/HSPA9/EPHA2/ARPC3/ACTN4/LCP1/PPP1CB/MPZL1/GRB7/RPS19/LAYN/LMLN/PPP1R12A/RPL31/GDI2/CAT/ADD1/TNS4/ANXA6/MSN/RPL27/NUMB/KRAS/RAB21/CLASP2/FHL2/RPL30/PRKAR2A/PIK3R2/FLNB/SENP1/NPM1/P4HB/JAK1/RPS29/SDCBP/TPM4/RSU1/WASF1/GNA13/LIMD1/RPS11/YES1/PDCD6IP/…	119
down	CC	GO:0001772	immunological synapse	22/3993	48/19880	0.458333	2.28191	4.4578	5.00614e-05	0.00101746	0.000726354	CD28/GZMA/NEDD9/PRKCQ/ZAP70/CD3E/MYH9/LAT/PRKAR1A/CRTAM/NPTN/RHOH/CORO1A/SCIMP/PDCD6IP/STX7/CD6/STOML2/LCK/CD37/PTPRJ/HLA-DRB1	22
down	BP	GO:0001701	in utero embryonic development	117/3850	403/18805	0.290323	1.41806	4.30444	2.29228e-05	0.00128389	0.00113016	CHD7/CASP8/KLF2/ATF2/CHD8/RTN4/TGFBR2/DAD1/TGFBR1/KDM8/IL10/NOG/LEF1/YBX1/STK4/NOS3/CNOT3/ATP7A/SMAD3/NPAT/MYH9/LIG4/RTCB/RPL7L1/WDR19/N4BP2L2/ST8SIA6/POLG2/HINFP/MED1/HEG1/COPS2/RAD51B/SMAD2/KDM4C/GPI/YTHDC1/TMEM231/BCOR/ACTL6A/SLC39A1/NSRP1/YBX3/BTF3/TRIM28/NLE1/PRDM1/GINS4/CCDC62/PHF6/CHST11/CNOT1/BRK1/ACVR1C/RPL13/VPS54/CITED2/GNA13/PLK4/ELL/COPS3/TERF2/CCNB2/TBL1XR1/EPN1/TAF8/ZNF568/MFNG/UNK…	117
down	MF	GO:0016887	ATP hydrolysis activity	123/3943	417/18639	0.294964	1.39433	4.21833	3.09124e-05	0.00226836	0.00192973	CHD7/KIF14/DDX42/RAD50/ATP1A1/SPAST/CHD8/DHX40/MCM3/ATP6V1G3/PEX1/MDN1/ATF7IP/ABCD2/CLPX/CHD6/DDX19A/CARNS1/HELB/SMARCAD1/PIF1/SRP54/DNAH6/ATP7A/DDX27/ATP6V1H/VPS4B/HSPA14/ORC1/KIF9/SLFN11/HSPA9/C10orf88/CDC6/KIF2A/YTHDC2/NVL/CCT7/KIF20B/MORC4/PEX6/LONP2/RAD51B/DHX36/DYNC1H1/SNRNP200/ATP8A1/BTAF1/SMC2/CCT4/KIF18A/KIF3A/PSMC6/WRNIP1/AK9/ATAD2B/ABCG1/BRIP1/KIF22/DDX10/RUVBL1/ATP13A1/VWA8/ACIN1/CCT3…	123
down	MF	GO:0140104	molecular carrier activity	80/3943	249/18639	0.321285	1.51875	4.26856	3.20438e-05	0.00226836	0.00192973	CHD7/XPO1/DDX42/RAD50/COX17/CHD8/DHX40/MCM3/XPO6/NAP1L1/CHD6/EMC7/DDX19A/HELB/SMARCAD1/PIF1/ATP7A/RAN/DDX27/FXN/VPS72/VPS4B/NUBPL/KPNA5/C10orf88/KPNA4/YTHDC2/IPO11/ANP32E/SPTY2D1/DHX36/SNRNP200/KPNA3/CCS/TNPO3/WRNIP1/PWP1/BRIP1/DDX10/RUVBL1/IPCEF1/RANBP6/EIF4A1/DPH3/EMC9/DDX23/DDX18/FIGNL1/NAV2/TDRD12/DUSP16/BAG3/EMC2/KPNB1/VCP/CHD4/DDX5/EIF4A3/XPO7/DHX38/MCM2/DDX6/NTPCR/EIF4ENIF1/DHX35/DDX21/DDX…	80
down	CC	GO:0098845	postsynaptic endosome	13/3993	24/19880	0.541667	2.6968	4.16982	0.000224579	0.00301577	0.00215292	RAB5A/RAB11A/STX12/ANP32E/EEA1/PIK3C3/CLSTN1/AP3M1/MKLN1/NSG1/VPS26B/ARC/ZDHHC2	13
down	MF	GO:0030159	signaling receptor complex adaptor activity	24/3943	52/18639	0.461538	2.18174	4.42012	4.87261e-05	0.00327683	0.00278765	LDLRAP1/IRS1/GNB5/CD3G/NCK2/CD3E/LAT/G3BP2/TRAT1/STAP1/GNB1/IRS2/BLNK/DEDD2/GNB4/DOK2/SH2B3/GRB10/PIK3R1/RGS14/NUP62/SHB/MMS19/FRS3	24
down	BP	GO:0070227	lymphocyte apoptotic process	33/3850	85/18805	0.388235	1.8963	4.20217	7.81508e-05	0.00369476	0.00325238	FASLG/IL7R/FOXP1/LIPA/TSC22D3/GIMAP8/IL10/CD274/BAK1/LMBR1L/PRKCQ/BCL11B/CD3G/SLC39A10/IL2RA/CD27/IRS2/BCL2/MIR17HG/RPS6/CHEK2/GPAM/CD74/SIVA1/LYN/CRKL/ST3GAL1/HIF1A/KIFAP3/HSH2D/DFFA/NFKBIZ/TRAF3IP2	33
down	CC	GO:0030496	midbody	63/3993	209/19880	0.301435	1.50076	3.64851	0.000334417	0.00419136	0.00299215	USP3/KIF14/CHMP7/CDC42/STK17B/SPAST/CCDC124/C9orf72/YPEL5/GNAI3/CAPG/PITPNM1/RAN/RALA/VPS4B/TTC23L/ZFYVE26/RASGEF1B/KIF20B/RAP2A/PIN1/CYLD/VPS37B/PIK3C3/CNTRL/ANXA11/SYNE1/CCDC66/RAB11FIP4/CRMP1/CHMP3/NAT10/MICAL3/DCDC1/CHMP4A/UVRAG/CENPF/PDCD6IP/SAFB/ARL8B/CENPC/KATNB1/POLDIP2/NUDC/ERH/LZTS2/MICAL1/GNAI1/KIF23/GNAI2/DNM2/NUP62/RACGAP1/ASPM/MYH10/CENPE/EXOC2/CHMP2B/SH3GLB1/PTCH1/ANLN/PKP4/CDK1	63
down	BP	GO:0007159	leukocyte cell-cell adhesion	120/3850	433/18805	0.277136	1.35365	3.77746	0.000163102	0.00641774	0.00564933	GOLPH3/CD28/CD5/IL7R/RASGRP1/DPP4/PECAM1/NDFIP1/TGFBR2/MAD1L1/CCR7/CD44/FBXO38/SASH3/SLAMF1/SMARCA2/IL10/CD274/CD40LG/STK10/SMAD7/LEF1/PRKCQ/RUNX1/MIA3/SMARCE1/ARID1B/PRKAA1/ZAP70/NCK2/IRF1/SEMA4D/IFNG/CD3E/EBI3/PIK3CA/B2M/ITGA4/IL2RA/LGALS9C/EGR3/TESPA1/PRKAR1A/ARID1A/XBP1/IL23A/SLC39A8/CRTAM/SHH/FOXO3/ADORA2A/CYLD/CBLB/CD27/DUSP10/ACTL6A/RHOH/MSN/PAG1/IL4R/GLMN/CD69/FOXJ1/ITPKB/HSPH1/CORO1A/HFE…	120
down	CC	GO:1904949	ATPase complex	41/3993	127/19880	0.322835	1.6073	3.44203	0.00078961	0.00824704	0.00588744	ATP6V1G3/ACTR6/SMARCA2/BCL11B/SMARCE1/ARID1B/ATP6V1H/VPS4B/YY1/BCL11A/ARID1A/ANP32E/ATP6AP2/ACTL6A/RBBP7/RUVBL1/MTA2/ACTR8/ING3/SMARCA5/SMARCA4/ATP6V1C1/TRRAP/MTA3/VCP/CHD4/ATP6V0E2/NFRKB/BAZ2A/CFDP1/RSF1/MYBBP1A/DDX21/BAZ1A/ATP6V0E1/PHF10/POLE3/ATP6V0B/ATP6V1C2/ATP6V1G1/BPTF	41
down	BP	GO:0016032	viral process	116/3850	421/18805	0.275534	1.34582	3.64116	0.000266109	0.00924246	0.00813585	CR2/CHMP7/CD28/SMPD1/RAB43/CCNK/DPP4/CXCR4/LAMP1/MON1B/SLAMF1/OAS2/PARP10/PTBP1/N4BP1/GSK3B/HTR2A/LAMP3/LEF1/MGAT5/SRPK2/RAN/CCNT1/MYH9/LIG4/PPIB/VPS4B/ISG20/SSB/RAB7A/TRIM14/EPHA2/TMEM41B/YTHDC2/CLDN1/TRIM38/PPIH/MAN1B1/NUCKS1/ST3GAL2/DDB1/KPNA3/VPS37B/JUN/PIK3C3/RAB1A/TPCN1/TBC1D20/TRIM28/STAT1/BCL2/TYRO3/ZNF639/P4HB/CHMP3/MOG/CANX/ATG12/CDHR3/SNW1/SMARCA4/SELPLG/CHMP4A/UVRAG/HSP90AB1/TMEM39A/P…	116
down	BP	GO:0180012	co-transcriptional RNA 3'-end processing, cleavage and polyadenylation pathway	8/3850	11/18805	0.727273	3.5523	4.29617	0.000277991	0.00949599	0.00835902	PCF11/ZCCHC8/PAPOLA/TUT1/SSU72/NUDT21/CPSF6/CPSF7	8
down	MF	GO:0051536	iron-sulfur cluster binding	30/3943	76/18639	0.394737	1.86597	3.91829	0.000210617	0.0101172	0.0086068	DDX12P/ISCU/FXN/NUBPL/ACO2/ELP3/LIAS/NDUFV1/CDKAL1/CDK5RAP1/BRIP1/DPH1/CISD2/DPYD/PPAT/MUTYH/ISCA1/ETFDH/ISCA2/NFS1/RFESD/NDUFS8/IREB2/ABAT/POLR3F/POLE/UQCRFS1/NDUFV2/GLRX3/NDUFS2	30
down	CC	GO:0030684	preribosome	35/3993	106/19880	0.330189	1.64391	3.33242	0.00118272	0.0118587	0.00846578	NOB1/MDN1/NOP58/WDR43/MRTO4/RPS19BP1/RPS28/UTP6/TBL3/RCL1/DIMT1/RIOK1/MAK16/RPS19/WDR75/NOL10/UTP18/RPS15A/NGDN/NAT10/NOC4L/PPAN/RPS6/PWP2/RPS11/RRS1/RPF1/RPS7/RPS27A/KRR1/RPS3A/ZNF622/XRCC5/RPS16/RPS24	35
down	BP	GO:0022904	respiratory electron transport chain	40/3850	117/18805	0.34188	1.66989	3.68786	0.000370571	0.0119781	0.0105439	NDUFB6/NDUFA1/COX7C/DNAJC15/ISCU/NDUFB7/UQCRQ/NDUFV3/NDUFV1/NDUFB8/CYCS/NDUFA12/UQCRC2/COX7A2L/COX6B1/VPS54/CHCHD2/GHITM/COX6A1/COX7A2/DGUOK/CYC1/COX6C/COX7B/DLD/ETFDH/ETFB/NDUFS8/MYBBP1A/COQ9/UQCRFS1/NDUFV2/NDUFA8/COX5B/NDUFB9/PLEC/CCNB1/NDUFS2/PUM2/CDK1	40
down	BP	GO:0006661	phosphatidylinositol biosynthetic process	41/3850	121/18805	0.338843	1.65505	3.66771	0.000389467	0.0123537	0.0108745	PIGU/PIP4K2A/IP6K2/HTR2A/PITPNM1/MTMR2/PIP5K1A/PIK3CA/DPM2/PIGG/ATG14/PIK3C3/SYNJ2/IMPA1/PIK3CG/PIGT/ITPKC/MTMR1/ITPKB/MTMR4/UVRAG/PIK3R1/TTC7A/PIK3R3/CDIPT/PI4K2A/PIP5K1B/IP6K1/MTMR14/SYNJ1/PIGO/PGAP3/VAC14/PIP5KL1/PIGA/INPP4B/PITPNM2/PIGW/FIG4/PGAP1/PLCG2	41
down	BP	GO:0009314	response to radiation	120/3850	442/18805	0.271493	1.32609	3.51992	0.000397633	0.0125487	0.0110462	INIP/AEN/TIPIN/FOS/RBX1/SMPD1/RRM1/XPC/DCUN1D3/PER2/ZRANB3/TREX1/MAPK13/GNB5/GPR88/PER1/BRAF/SLC1A3/NOG/BAK1/N4BP1/NPHP1/PCNA/PITPNM1/USP28/MMP9/PRKAA1/COL6A3/ELK1/AANAT/LIG4/USP1/NABP1/YY1/HMGCR/DNMT3A/SDE2/CCND2/FBXO4/ATR/CEP250/CYP2R1/EYA3/PPP1CB/RGS9BP/DHX36/MAP4K3/NUCKS1/DDB1/BABAM1/CAT/GRIN1/SYNE1/CACNA1F/CCDC66/BCL2/UIMC1/KRAS/TMEM109/RFWD3/RDH13/FOXB1/AKT2/CRB1/PLEKHB1/NPM1/DCLRE1C/MAPK10…	120
down	BP	GO:0031503	protein-containing complex localization	65/3850	216/18805	0.300926	1.46985	3.52385	0.000491733	0.0146976	0.0129378	XPO1/ZNF365/FXR1/PPP3R1/NME7/IFT81/MDN1/PCM1/SMAD7/IFT27/RAN/RALA/RAB11A/IFT172/IFT74/RAB7A/WDR19/TMEM232/AKIRIN2/ATR/HIP1/CBLB/NDC1/IFT43/SYNE1/NPTN/NUMB/CALY/DLG2/CLSTN1/NPM1/DYNLL1/AP2B1/AP2M1/MZT1/LCA5/TERF1/STX7/RAPSN/AP3M1/MKLN1/TTC21A/SLC12A5/CLUAP1/BBS12/NSG1/ADAM10/KIF5C/NPTX1/SLC1A1/VAMP4/AP2A1/VPS35/KIFAP3/VPS26B/SSX2IP/VAC14/OGT/AP3D1/FKBP4/ARC/ZDHHC2/TTC21B/EPG5/KIF2C	65
down	MF	GO:0016407	acetyltransferase activity	35/3943	96/18639	0.364583	1.72343	3.68089	0.000403891	0.0159775	0.0135923	ATF2/ING4/SMARCE1/ESCO2/AANAT/FASN/ELP3/KAT6B/ACAT1/ESCO1/PAFAH1B2/KAT7/JADE2/NAT10/ING3/BRD1/HGSNAT/JADE1/NAA20/NCOA3/TAF9/NAA15/NAA50/PAFAH2/KAT2B/SAT1/HAT1/ATAT1/BRPF3/PHF10/EP300/NAA16/CASD1/KAT6A/ACAA1	35
down	MF	GO:0019787	ubiquitin-like protein transferase activity	132/3943	479/18639	0.275574	1.30267	3.4761	0.000444664	0.0162285	0.0138058	RNF157/UHRF2/UBE2D2/CDC42/RBX1/UBE2W/IRF2BPL/NSMCE2/HERC6/MDM4/ZNF451/BIRC3/NFX1/RNF11/FBXO3/SHPRH/MYCBP2/AKTIP/MGRN1/FBXL14/HERC4/HDAC7/RNF216/TRIM14/RAD18/RNF44/MED30/FBXO4/RNF5/TNFAIP1/MED11/MED1/BFAR/BTRC/TTC3/UBE2D4/TRIM38/RNF212/TRAF3/BIRC2/RNF20/CBLB/LTN1/BCOR/UBE2N/RNF215/FBXO11/ATG3/TRIM28/KLHL20/ASB2/NOSIP/RFFL/RNF121/HERC3/TRIM2/RFWD3/PPP1R11/TRIM69/RNF4/MED7/RNF139/CHFR/HACE1/ARIH1/MS…	132
down	BP	GO:2000209	regulation of anoikis	13/3850	26/18805	0.5	2.44221	3.73371	0.000756338	0.0204441	0.0179963	CEACAM6/PIK3CA/BCL2/TLE1/CHEK2/BRMS1/PIK3R3/ANKRD13C/PTK2/MYBBP1A/BCL2L1/SNAI2/ZNF304	13
down	BP	GO:0071456	cellular response to hypoxia	49/3850	156/18805	0.314103	1.53421	3.39944	0.00082133	0.0219151	0.0192911	SUV39H1/FOS/SUV39H2/ATF2/RTN4/MDM4/FAM162A/HILPDA/ATP7A/PRKAA1/ADO/MALAT1/PTPN1/PRKCE/DNMT3A/MAP3K7/EPHA4/PIN1/FOXO3/BCL2/BRIP1/P4HB/PDK1/MYC/PHB2/CITED2/CHCHD2/AQP3/ZFP36L1/EPAS1/EDN1/RORA/BAD/CCNA2/CYSLTR1/PPARD/PDK3/HIF1A/INHBA/PGK1/AIFM1/MIR146A/NDRG1/CYBB/RGCC/OPRD1/CDKN1B/SCN2A/BNIP3	49
down	BP	GO:0140588	chromatin looping	52/3850	168/18805	0.309524	1.51184	3.38116	0.000846409	0.0221344	0.0194842	CHD7/CCAT1/DDX42/RAD50/CHD8/DHX40/MCM3/NSMCE2/JPX/CHD6/DDX19A/HELB/SMARCAD1/CASC11/PIF1/DDX27/VPS4B/C10orf88/YTHDC2/DHX36/SNRNP200/WRNIP1/BRIP1/DDX10/RUVBL1/EIF4A1/DDX23/DDX18/FIGNL1/NAV2/TDRD12/VCP/CHD4/DDX5/EIF4A3/DHX38/MCM2/DDX6/NTPCR/DHX35/DDX21/DDX24/CHD2/DHX58/DDX50/DDX56/BRD2/ATRX/DDX47/DDX31/DDX39B/CTCF	52
down	MF	GO:0140097	catalytic activity, acting on DNA	96/3943	336/18639	0.285714	1.3506	3.35922	0.000718401	0.023006	0.0195715	CHD7/AEN/DNASE2/DFFB/DDX42/RAD50/CHD8/DHX40/MCM3/MBD4/ZRANB3/TREX1/SMARCA2/DDX12P/CHD6/PCNA/DDX19A/APTX/HELB/SMARCAD1/PIF1/DDX27/LIG4/VPS4B/THAP9/ISG20/DNMT3A/C10orf88/POLG2/ASTE1/YTHDC2/MAU2/NEIL1/RAD51B/DHX36/PLD3/SNRNP200/TDG/TDP1/BTAF1/WRNIP1/BRIP1/DDX10/RUVBL1/XRCC1/DCLRE1C/EIF4A1/SMARCA5/SMARCA4/EXO1/DDX23/DDX18/SMUG1/TERF2/FIGNL1/TERF1/NAV2/TDRD12/FEN1/VCP/CHD4/DDX5/NEIL2/DNMT3B/DNASE1L3/M…	96
down	BP	GO:0051338	regulation of transferase activity	122/3850	463/18805	0.263499	1.28704	3.17299	0.00121646	0.0270097	0.0237758	KIF14/RAD50/FLT1/RASGRP1/CCNK/CDC37/CCR7/CCNY/CALM1/RBL1/GSK3B/PTK2B/PCNA/SNX9/MVP/PRKCH/NEDD9/ZNF675/TINF2/CCNT1/PABPN1/PLA2G1B/IFNG/LAT/PTPN1/PPP1R3F/PIK3R5/CCND2/POLG2/CDC6/BTRC/HEG1/MAP3K7/PRKAG1/EPHA4/LDB1/DUSP10/IRS2/RBL2/PIK3CG/MAD2L1/CDK5RAP1/BAG5/PKIA/CDKN2C/TENM1/XRCC1/TSPYL2/NPM1/CACUL1/APOA1/DUSP1/ETAA1/APC/CDC14B/SKP1/CDKN3/CCNG1/CD200/FEM1A/NEK10/UVRAG/LCP2/ERP29/CD74/PTPRC/SOCS4/GT…	122
down	MF	GO:0001217	DNA-binding transcription repressor activity	81/3943	278/18639	0.291367	1.37732	3.28323	0.000963888	0.0275836	0.0234658	HIVEP1/BACH1/ZFP90/ZNF91/MAX/FOXP1/KLF12/ZBTB10/PURA/IKZF5/PRDM2/NFX1/LEF1/TRPS1/MZF1/NFE2L3/ZNF354C/SMAD3/MXI1/THAP1/YY1/BCL11A/ZBTB5/HINFP/ZKSCAN3/FOXO3/ZBTB26/SP2/CUX2/TGIF1/BACH2/JUN/NR1D1/NFATC3/FOXO1/PRDM1/ZNF692/ZBTB32/TGIF2/SKI/MYC/NFATC2/GFI1/TCF7/NFE2L1/ZBTB18/ZNF750/ZBTB21/CREM/JPH2/SAMD7/ZNF93/LRRFIP1/RARA/SATB1/ZNF85/ZNF572/HES1/TCF3/ZNF217/REST/ZNF140/PPARD/ZNF134/HIF1A/ZBED2/SREBF2…	81
down	CC	GO:1904115	axon cytoplasm	22/3993	63/19880	0.349206	1.7386	2.94365	0.00426841	0.0281565	0.0201005	SPAST/MAP1A/DYNC1H1/KIF3A/RANGAP1/RAB21/CALY/DLG2/BLOC1S3/AGTPBP1/AP3M1/ARL8B/AP3M2/SOD1/KIF5C/HDAC6/HIF1A/NDEL1/AP3D1/BLOC1S6/FBXW11/TRAK1	22
down	MF	GO:0140996	histone H3 kinase activity	100/3943	357/18639	0.280112	1.32412	3.20289	0.00116196	0.0287929	0.0244945	TNIK/DYRK1B/FLT1/STK17B/ULK4/NUAK2/BMP2K/DYRK2/SNRK/BRAF/MAP4K4/GSK3B/PTK2B/STK10/STK4/CSNK2A3/MARK3/TXK/SRPK2/PRKCA/FER/PRKAA1/ZAP70/TSSK6/PDIK1L/AAK1/PIK3CA/RPS6KA3/EPHA2/ATR/RPS6KA5/RIOK1/IRAK4/STK24/DYRK1A/CSNK1G3/ARAF/SGK1/EPHA4/MAP4K3/DDR1/IKBKB/STK16/PRKX/PRKCB/PIK3CG/TNK2/TYRO3/MAP2K5/TRPM7/ULK2/AKT2/TTBK1/TTK/PKDCC/JAK1/KDR/TESK2/NEK10/ITK/CHEK2/YES1/RPS6KB1/MAST4/FYN/RPS6KA2/TLK1/ABL1/L…	100
down	MF	GO:0031386	protein tag activity	9/3943	15/18639	0.6	2.83627	3.68518	0.00120055	0.0287929	0.0244945	UBB/UBA52/SUMO1P1/ATG12/RPS27A/UBL5/SUMO1/FAU/URM1	9
down	MF	GO:0141047	molecular tag activity	9/3943	15/18639	0.6	2.83627	3.68518	0.00120055	0.0287929	0.0244945	UBB/UBA52/SUMO1P1/ATG12/RPS27A/UBL5/SUMO1/FAU/URM1	9
down	MF	GO:0035198	miRNA binding	18/3943	42/18639	0.428571	2.0259	3.44765	0.00124163	0.0287929	0.0244945	PUM1/ZC3H7B/YBX1/MALAT1/AGO2/NEAT1/ZC3H7A/ZC3H10/RBM4/HNRNPA1/QKI/LINC-ROR/ZNF346/TARBP2/HNRNPA2B1/DDX21/MATR3/PUM2	18
down	MF	GO:0140658	ATP-dependent chromatin remodeler activity	50/3943	158/18639	0.316456	1.49592	3.24259	0.00129493	0.0295199	0.025113	CHD7/DDX42/RAD50/CHD8/DHX40/MCM3/SMARCA2/CHD6/DDX19A/HELB/SMARCAD1/PIF1/DDX27/VPS4B/C10orf88/YTHDC2/DHX36/SNRNP200/WRNIP1/BRIP1/DDX10/RUVBL1/EIF4A1/SMARCA5/SMARCA4/DDX23/DDX18/FIGNL1/NAV2/TDRD12/VCP/CHD4/DDX5/EIF4A3/DHX38/MCM2/DDX6/NTPCR/RSF1/DHX35/DDX21/DDX24/CHD2/DHX58/DDX50/DDX56/ATRX/DDX47/DDX31/DDX39B	50
down	BP	GO:0034612	response to tumor necrosis factor	69/3850	241/18805	0.286307	1.39844	3.15865	0.00149367	0.0313721	0.0276159	CASP8/FOS/NUB1/SMPD1/KLF2/FOXP1/BIRC3/RRAGA/SMPD4/PTK2B/AFF3/ZNF675/IGBP1/TMC8/YTHDC2/ACTN4/CLDN1/MAP3K7/CPNE1/TRAF3/BIRC2/FOXO3/MAP4K3/CYLD/IKBKB/TNFRSF1A/TIFA/NR1D1/NKIRAS1/YBX3/CD40/STAT1/PRPF8/RFFL/TMSB4X/APOA1/TNFRSF25/COMMD7/TUBA1A/NFATC1/RPS6KB1/ZFP36L1/LIMS1/TNFRSF13C/EXT1/EDN1/NSMAF/HES1/SPPL2B/ADAM10/RORA/CASP3/CTSK/TNFRSF17/LAPTM5/TNFAIP3/TXNDC17/SMPD3/GCH1/TNFRSF11A/MAPKAPK2/HYAL3/TNF…	69
down	BP	GO:0061077	chaperone-mediated protein folding	27/3850	76/18805	0.355263	1.73525	3.25873	0.00165655	0.0341018	0.0300188	UNC45A/VBP1/DNAJB1/PFDN2/PPIB/HSPA14/HSPA9/CCT7/CCT4/PDCL3/DNAJB4/CCT3/HSPH1/CCT2/HSP90AB1/CD74/CCT8/DNAJB8/TCP1/DFFA/DNAJB13/FKBP4/SDF2/CSNK2A1/DNAJB12/HSPA13/PDIA4	27
down	MF	GO:0051010	microtubule plus-end binding	11/3943	21/18639	0.52381	2.47611	3.5057	0.00157217	0.0341059	0.0290144	MAPRE2/NUMA1/KIF18A/CLASP2/APC/MAPRE1/STIM1/FBXW11/CKAP5/TTBK2/KIF2C	11
down	MF	GO:0140312	cargo adaptor activity	11/3943	21/18639	0.52381	2.47611	3.5057	0.00157217	0.0341059	0.0290144	GOLPH3/LDLRAP1/HIP1/AP1M1/HIP1R/AP1S3/AP2B1/AP2M1/GOLPH3L/AP2A1/AP4E1	11
down	CC	GO:0032279	asymmetric synapse	96/3993	376/19880	0.255319	1.27116	2.66124	0.00565034	0.0357063	0.0254902	TNIK/HNRNPH2/PSD/ATP1A1/RTN4/CNIH2/CAPZB/SH3KBP1/LZTS1/GRID1/SOS1/RHEB/PTK2B/DNAJB1/GRID2IP/FBXO45/ATP7A/IQSEC1/MTMR2/NCK2/NRCAM/STRN/GAP43/CDKL5/ANP32E/EPHA4/ADORA2A/LIN7C/RPS19/LRFN3/ADD1/GRIN1/LRFN4/ARHGEF9/PTPRO/NPTN/HIP1R/IGSF9/RPL30/CPEB4/DLG2/CLSTN1/RPL14/AGAP3/CAMK2D/PHB2/PRKCG/TRAPPC4/GRIN2A/HNRNPD/ABHD17B/FYN/RNF10/ITPR1/CNKSR2/GRM5/PLXNC1/ABL1/GOPC/CHD4/SLC16A7/PDE4B/VANGL2/ADAM10/CASP…	96
down	MF	GO:0140713	histone chaperone activity	51/3943	164/18639	0.310976	1.47002	3.13153	0.00178095	0.0372382	0.031679	CHD7/DDX42/RAD50/CHD8/DHX40/MCM3/NAP1L1/CHD6/DDX19A/HELB/SMARCAD1/PIF1/DDX27/VPS72/VPS4B/C10orf88/YTHDC2/ANP32E/SPTY2D1/DHX36/SNRNP200/WRNIP1/PWP1/BRIP1/DDX10/RUVBL1/EIF4A1/DDX23/DDX18/FIGNL1/NAV2/TDRD12/VCP/CHD4/DDX5/EIF4A3/DHX38/MCM2/DDX6/NTPCR/DHX35/DDX21/DDX24/CHD2/DHX58/DDX50/DDX56/ATRX/DDX47/DDX31/DDX39B	51
down	MF	GO:0140852	histone ubiquitin ligase activity	8/3943	13/18639	0.615385	2.90899	3.56639	0.0018273	0.0372382	0.031679	RNF20/MSL2/HUWE1/TRIM37/UBR2/UHRF1/DTX3L/PCGF5	8
down	MF	GO:0140597	protein carrier chaperone	57/3943	188/18639	0.303191	1.43322	3.09237	0.0019199	0.0377009	0.0320727	CHD7/DDX42/RAD50/CHD8/DHX40/MCM3/NAP1L1/CHD6/EMC7/DDX19A/HELB/SMARCAD1/PIF1/DDX27/VPS72/VPS4B/C10orf88/YTHDC2/ANP32E/SPTY2D1/DHX36/SNRNP200/WRNIP1/PWP1/BRIP1/DDX10/RUVBL1/EIF4A1/EMC9/DDX23/DDX18/FIGNL1/NAV2/TDRD12/DUSP16/BAG3/EMC2/VCP/CHD4/DDX5/EIF4A3/DHX38/MCM2/DDX6/NTPCR/DHX35/DDX21/DDX24/CHD2/DHX58/DDX50/DDX56/ATRX/EMC10/DDX47/DDX31/DDX39B	57
down	MF	GO:0141003	histone H2AX kinase activity	98/3943	354/18639	0.276836	1.30864	3.03678	0.0019341	0.0377009	0.0320727	TNIK/DYRK1B/FLT1/STK17B/ULK4/NUAK2/BMP2K/DYRK2/SNRK/BRAF/MAP4K4/GSK3B/PTK2B/STK10/STK4/CSNK2A3/MARK3/TXK/SRPK2/FER/PRKAA1/ZAP70/TSSK6/PDIK1L/AAK1/PIK3CA/RPS6KA3/EPHA2/ATR/RPS6KA5/RIOK1/IRAK4/STK24/DYRK1A/CSNK1G3/ARAF/SGK1/EPHA4/MAP4K3/DDR1/IKBKB/STK16/PRKX/PIK3CG/TNK2/TYRO3/MAP2K5/TRPM7/ULK2/AKT2/TTBK1/TTK/PKDCC/JAK1/KDR/TESK2/NEK10/ITK/CHEK2/YES1/RPS6KB1/MAST4/FYN/RPS6KA2/TLK1/ABL1/LMTK3/DMPK/PI…	98
down	BP	GO:0010634	positive regulation of epithelial cell migration	19/3850	48/18805	0.395833	1.93341	3.28531	0.00188999	0.0378639	0.0333304	RTN4/TGFBR2/MAPRE2/MAP4K4/MMP9/ENPP2/IQSEC1/RAB11A/IFNG/PRKCE/IRS2/RREB1/CLASP2/EPB41L4B/HDAC6/HIF1A/PTK2/GLIPR2/PLCG2	19
down	MF	GO:0003925	G protein activity	21/3943	54/18639	0.388889	1.83832	3.1955	0.00223307	0.0413502	0.0351772	CDC42/RAB5A/GNAS/RAN/RALA/RAB11A/RAB4B/RAB7A/RAP2A/RAB1A/RAP1B/KRAS/GNA13/SAR1A/ARL8B/GNAQ/GNAI1/SAR1B/RAB1B/NRAS/RASL11A	21
down	BP	GO:0016049	cell growth	127/3850	492/18805	0.25813	1.26081	2.97438	0.00220259	0.041353	0.0364018	CD2AP/RNF157/CDKL3/KIF14/CDC42/FOXP1/NIN/CRLF3/RTN4/DCUN1D3/TGFBR2/C9orf72/CXCR4/SEMA6C/CYFIP2/TGFBR1/ING1/SMARCA2/IP6K2/GSK3B/PTK2B/ING4/SMAD7/PRKCQ/VGLL4/CSNK2A3/DERL2/EAF2/SLC9A6/SMAD3/FXN/SEMA4D/NRCAM/YY1/ITGA4/MIR23A/RPS6KA3/BCL11A/CDKL5/LLPH/PRSS2/XBP1/SGK1/CPNE1/CDKN2AIP/DDR1/RBBP7/ZC3H12D/KAT7/BCL2/CDKN2C/ZNF639/MAP2K5/RAB21/CLASP2/JADE2/ULK2/CLSTN1/TSPYL2/CAMK2D/SDCBP/WASF1/FSTL4/ESR2/SM…	127
down	BP	GO:0045926	negative regulation of growth	66/3850	233/18805	0.283262	1.38357	2.98919	0.00248327	0.0447493	0.0393914	CDKL3/FOXP1/CRLF3/RTN4/DCUN1D3/SEMA6C/ING1/SMARCA2/IP6K2/NOG/ING4/STK4/GNAS/VGLL4/PLAC8/JARID2/EAF2/SMAD3/FXN/YY1/BCL11A/GPC3/CDKN2AIP/DUSP10/RBBP7/ZC3H12D/MYOZ1/BCL2/CDKN2C/MIR17HG/ULK2/TSPYL2/FSTL4/ESR2/CITED2/SMARCA4/IFRD1/NAIF1/BBS2/JADE1/ST20/TMPRSS4/NDRG3/MYL2/ADIPOR1/SIPA1/PPARD/GJA1/HDAC6/HIF1A/INHBA/BTG1/GSK3A/CDHR2/SERTAD3/SMAD4/LGMN/SAV1/CDKN1B/PTCH1/TP73/PTPRJ/TCHP/NTN1/FBP1/PI16	66
down	BP	GO:0070229	negative regulation of lymphocyte apoptotic process	16/3850	39/18805	0.410256	2.00386	3.18407	0.00274693	0.0485161	0.0427072	IL7R/FOXP1/TSC22D3/PRKCQ/BCL11B/SLC39A10/CD27/IRS2/BCL2/MIR17HG/GPAM/CD74/ST3GAL1/HIF1A/KIFAP3/HSH2D	16
